# Supplementary material for: Whole Genome Sequence Analysis of <em>Listeria monocytogenes</em> Isolates Recovered from Cattle Farms, Cattle Abattoirs, and Retail Outlets in Gauteng Province, South Africa
Source: Preprints.org preprint supplement (doi:10.20944/preprints202403.1868.v1), 2024-03-29
Supplement: Supplementary file 1 [file supplementary]

## Sheet: Table S1
Supplementary Table S1. Coverage of the sequences used for further analysis
Bin Id	Marker lineage	# genomes	# markers	# marker sets	Completeness	Contamination	Strain heterogeneity	Genome size (bp)	# ambiguous bases	# scaffolds	# contigs	N50 (scaffolds)	N50 (contigs)	Mean scaffold length (bp)	Mean contig length (bp)	Longest scaffold (bp)	Longest contig (bp)	GC	GC std (scaffolds > 1kbp)	Coding density	Translation table	# predicted genes	0	1	2	3	4	5+	classification
CFSAN117454	c__Bacilli (UID354)	515	329	183	99.45	0	0	3050337	0	42	42	175439	175439	72627	72627	357398	357398	37.7	4.68	89.84	11	3032	1	328	0	0	0	0	d__Bacteria;p__Firmicutes;c__Bacilli;o__Lactobacillales;f__Listeriaceae;g__Listeria;s__Listeria monocytogenes_B
CFSAN117456	c__Bacilli (UID354)	515	328	182	99.45	0	0	3003161	0	55	55	133442	133442	54602	54602	217173	217173	38	2.99	89.96	11	2988	1	327	0	0	0	0	d__Bacteria;p__Firmicutes;c__Bacilli;o__Lactobacillales;f__Listeriaceae;g__Listeria;s__Listeria monocytogenes
CFSAN117461	c__Bacilli (UID354)	515	329	183	99.45	0	0	3084484	0	65	65	164130	164130	47453	47453	369196	369196	37.7	3.34	89.85	11	3091	1	328	0	0	0	0	d__Bacteria;p__Firmicutes;c__Bacilli;o__Lactobacillales;f__Listeriaceae;g__Listeria;s__Listeria monocytogenes_B
CFSAN117462	c__Bacilli (UID354)	515	328	182	99.45	0	0	2957583	0	120	120	55934	55934	24646	24646	151463	151463	38	3.64	90.13	11	2948	1	327	0	0	0	0	d__Bacteria;p__Firmicutes;c__Bacilli;o__Lactobacillales;f__Listeriaceae;g__Listeria;s__Listeria monocytogenes
CFSAN117464	c__Bacilli (UID354)	515	329	183	99.45	0	0	3053448	0	154	154	58026	58026	19827	19827	183644	183644	37.9	3.43	89.81	11	3082	1	328	0	0	0	0	d__Bacteria;p__Firmicutes;c__Bacilli;o__Lactobacillales;f__Listeriaceae;g__Listeria;s__Listeria monocytogenes_B
CFSAN117466	c__Bacilli (UID354)	515	329	183	99.45	0	0	3054690	0	34	34	225254	225254	89843	89843	481622	481622	37.8	4.52	89.82	11	3030	1	328	0	0	0	0	d__Bacteria;p__Firmicutes;c__Bacilli;o__Lactobacillales;f__Listeriaceae;g__Listeria;s__Listeria monocytogenes_B
CFSAN117470	c__Bacilli (UID354)	515	328	182	99.45	0	0	3031035	0	33	33	277112	277112	91849	91849	438064	438064	37.9	4.74	89.91	11	3022	1	327	0	0	0	0	d__Bacteria;p__Firmicutes;c__Bacilli;o__Lactobacillales;f__Listeriaceae;g__Listeria;s__Listeria monocytogenes
CFSAN117471	c__Bacilli (UID354)	515	328	182	99.45	0	0	3032227	0	25	25	270201	270201	121289	121289	542863	542863	37.9	4.59	89.88	11	3017	1	327	0	0	0	0	d__Bacteria;p__Firmicutes;c__Bacilli;o__Lactobacillales;f__Listeriaceae;g__Listeria;s__Listeria monocytogenes
CFSAN117472	c__Bacilli (UID354)	515	328	182	99.45	0.27	0	3094165	0	22	22	473927	473927	140643	140643	937590	937590	37.8	4.93	89.64	11	3118	1	326	1	0	0	0	d__Bacteria;p__Firmicutes;c__Bacilli;o__Lactobacillales;f__Listeriaceae;g__Listeria;s__Listeria monocytogenes
CFSAN117473	c__Bacilli (UID354)	515	329	183	99.45	0	0	3067744	0	42	42	128973	128973	73041	73041	329637	329637	37.7	4.09	90.07	11	3067	1	328	0	0	0	0	d__Bacteria;p__Firmicutes;c__Bacilli;o__Lactobacillales;f__Listeriaceae;g__Listeria;s__Listeria monocytogenes_B
CFSAN117481	c__Bacilli (UID354)	515	328	182	99.45	0	0	2994117	0	25	25	424701	424701	119764	119764	508519	508519	37.9	5.39	90.06	11	2988	1	327	0	0	0	0	d__Bacteria;p__Firmicutes;c__Bacilli;o__Lactobacillales;f__Listeriaceae;g__Listeria;s__Listeria monocytogenes
CFSAN117486	c__Bacilli (UID354)	515	329	183	99.45	0	0	3049414	0	59	59	146578	146578	51684	51684	254899	254899	37.8	4.11	89.84	11	3034	1	328	0	0	0	0	d__Bacteria;p__Firmicutes;c__Bacilli;o__Lactobacillales;f__Listeriaceae;g__Listeria;s__Listeria monocytogenes_B
CFSAN117490	c__Bacilli (UID354)	515	329	183	99.45	0.55	0	2938561	0	38	38	201863	201863	77330	77330	442895	442895	37.8	4.75	89.93	11	2878	1	327	1	0	0	0	d__Bacteria;p__Firmicutes;c__Bacilli;o__Lactobacillales;f__Listeriaceae;g__Listeria;s__Listeria monocytogenes
CFSAN117492	c__Bacilli (UID354)	515	329	183	99.45	0.55	0	2939297	0	31	31	324206	324206	94816	94816	435240	435240	37.8	4.8	89.93	11	2877	1	327	1	0	0	0	d__Bacteria;p__Firmicutes;c__Bacilli;o__Lactobacillales;f__Listeriaceae;g__Listeria;s__Listeria monocytogenes
CFSAN117493	c__Bacilli (UID354)	515	328	182	99.45	0	0	3007951	0	67	67	178152	178152	44894	44894	369828	369828	37.9	3.45	89.87	11	3000	1	327	0	0	0	0	d__Bacteria;p__Firmicutes;c__Bacilli;o__Lactobacillales;f__Listeriaceae;g__Listeria;s__Listeria monocytogenes
CFSAN117494	c__Bacilli (UID354)	515	328	182	99.45	0	0	3011261	0	62	62	163856	163856	48568	48568	542575	542575	37.9	4.3	89.79	11	3000	1	327	0	0	0	0	d__Bacteria;p__Firmicutes;c__Bacilli;o__Lactobacillales;f__Listeriaceae;g__Listeria;s__Listeria monocytogenes
CFSAN117495	c__Bacilli (UID354)	515	329	183	99.45	0	0	3104461	0	25	25	357371	357371	124178	124178	480703	480703	37.8	4.35	89.72	11	3085	1	328	0	0	0	0	d__Bacteria;p__Firmicutes;c__Bacilli;o__Lactobacillales;f__Listeriaceae;g__Listeria;s__Listeria monocytogenes_B
CFSAN117497	c__Bacilli (UID354)	515	328	182	99.45	0	0	2954021	0	41	41	180694	180694	72049	72049	393092	393092	38	3.91	89.97	11	2926	1	327	0	0	0	0	d__Bacteria;p__Firmicutes;c__Bacilli;o__Lactobacillales;f__Listeriaceae;g__Listeria;s__Listeria monocytogenes
CFSAN117498	c__Bacilli (UID354)	515	328	182	99.45	0	0	2989604	0	58	58	141266	141266	51544	51544	282278	282278	38	3.46	89.86	11	2972	1	327	0	0	0	0	d__Bacteria;p__Firmicutes;c__Bacilli;o__Lactobacillales;f__Listeriaceae;g__Listeria;s__Listeria monocytogenes
CFSAN117501	c__Bacilli (UID354)	515	328	182	99.45	0	0	2991746	0	26	26	243827	243827	115067	115067	435771	435771	37.9	4.55	90.07	11	2991	1	327	0	0	0	0	d__Bacteria;p__Firmicutes;c__Bacilli;o__Lactobacillales;f__Listeriaceae;g__Listeria;s__Listeria monocytogenes
CFSAN117503	c__Bacilli (UID354)	515	328	182	99.45	0	0	2991985	0	26	26	361992	361992	115076	115076	435770	435770	37.9	4.69	89.85	11	2964	1	327	0	0	0	0	d__Bacteria;p__Firmicutes;c__Bacilli;o__Lactobacillales;f__Listeriaceae;g__Listeria;s__Listeria monocytogenes
CFSAN117504	c__Bacilli (UID354)	515	328	182	99.45	0	0	2953499	0	24	24	257039	257039	123062	123062	424607	424607	38	5.22	89.98	11	2920	1	327	0	0	0	0	d__Bacteria;p__Firmicutes;c__Bacilli;o__Lactobacillales;f__Listeriaceae;g__Listeria;s__Listeria monocytogenes
CFSAN117537	c__Bacilli (UID354)	515	329	183	99.45	0	0	3164454	0	30	30	308340	308340	105481	105481	535421	535421	37.7	4.91	90.04	11	3184	1	328	0	0	0	0	d__Bacteria;p__Firmicutes;c__Bacilli;o__Lactobacillales;f__Listeriaceae;g__Listeria;s__Listeria monocytogenes_B
CFSAN117541	c__Bacilli (UID354)	515	328	182	99.45	0	0	2946577	0	48	48	125873	125873	61387	61387	359420	359420	38	3.92	89.86	11	2897	1	327	0	0	0	0	d__Bacteria;p__Firmicutes;c__Bacilli;o__Lactobacillales;f__Listeriaceae;g__Listeria;s__Listeria monocytogenes
CFSAN117542	c__Bacilli (UID354)	515	329	183	99.45	0	0	3057035	0	36	36	321562	321562	84917	84917	506337	506337	37.8	5.27	89.78	11	3036	1	328	0	0	0	0	d__Bacteria;p__Firmicutes;c__Bacilli;o__Lactobacillales;f__Listeriaceae;g__Listeria;s__Listeria monocytogenes_B
CFSAN117545	c__Bacilli (UID354)	515	329	183	99.45	0	0	3022841	0	37	37	225245	225245	81698	81698	357401	357401	37.7	4.63	89.81	11	3004	1	328	0	0	0	0	d__Bacteria;p__Firmicutes;c__Bacilli;o__Lactobacillales;f__Listeriaceae;g__Listeria;s__Listeria monocytogenes_B
CFSAN117546	c__Bacilli (UID354)	515	329	183	99.45	0	0	3025033	0	27	27	264370	264370	112038	112038	477600	477600	37.7	4.99	89.82	11	2997	1	328	0	0	0	0	d__Bacteria;p__Firmicutes;c__Bacilli;o__Lactobacillales;f__Listeriaceae;g__Listeria;s__Listeria monocytogenes_B
CFSAN117555	c__Bacilli (UID354)	515	328	182	99.45	0	0	3030224	0	23	23	242303	242303	131748	131748	546620	546620	37.9	1.14	89.91	11	3015	1	327	0	0	0	0	d__Bacteria;p__Firmicutes;c__Bacilli;o__Lactobacillales;f__Listeriaceae;g__Listeria;s__Listeria monocytogenes
CFSAN117559	c__Bacilli (UID354)	515	328	182	99.45	0.27	0	3093731	0	40	40	219483	219483	77343	77343	442551	442551	37.8	4.43	89.68	11	3125	1	326	1	0	0	0	d__Bacteria;p__Firmicutes;c__Bacilli;o__Lactobacillales;f__Listeriaceae;g__Listeria;s__Listeria monocytogenes
CFSAN117561	c__Bacilli (UID354)	515	328	182	99.45	0	0	2990426	0	70	70	87244	87244	42720	42720	199929	199929	38	3.85	89.92	11	2982	1	327	0	0	0	0	d__Bacteria;p__Firmicutes;c__Bacilli;o__Lactobacillales;f__Listeriaceae;g__Listeria;s__Listeria monocytogenes
CFSAN117565	c__Bacilli (UID354)	515	328	182	99.45	0	0	3029698	0	21	21	278345	278345	144271	144271	546623	546623	37.9	1.08	89.92	11	3016	1	327	0	0	0	0	d__Bacteria;p__Firmicutes;c__Bacilli;o__Lactobacillales;f__Listeriaceae;g__Listeria;s__Listeria monocytogenes
CFSAN117567	c__Bacilli (UID354)	515	329	183	99.45	0	0	3049066	0	32	32	159548	159548	95283	95283	463682	463682	37.7	4.15	89.82	11	3027	1	328	0	0	0	0	d__Bacteria;p__Firmicutes;c__Bacilli;o__Lactobacillales;f__Listeriaceae;g__Listeria;s__Listeria monocytogenes_B
CFSAN117571	c__Bacilli (UID354)	515	329	183	99.45	0	0	3050176	0	27	27	182374	182374	112969	112969	417906	417906	37.7	4.61	89.82	11	3026	1	328	0	0	0	0	d__Bacteria;p__Firmicutes;c__Bacilli;o__Lactobacillales;f__Listeriaceae;g__Listeria;s__Listeria monocytogenes_B
CFSAN117572	c__Bacilli (UID354)	515	328	182	99.45	0	0	2979317	0	116	116	61619	61619	25683	25683	201228	201228	38	3.48	90.04	11	2998	1	327	0	0	0	0	d__Bacteria;p__Firmicutes;c__Bacilli;o__Lactobacillales;f__Listeriaceae;g__Listeria;s__Listeria monocytogenes
CFSAN117577	c__Bacilli (UID354)	515	328	182	99.45	0.27	0	3091364	0	38	38	229576	229576	81351	81351	423639	423639	37.8	4.13	89.72	11	3121	1	326	1	0	0	0	d__Bacteria;p__Firmicutes;c__Bacilli;o__Lactobacillales;f__Listeriaceae;g__Listeria;s__Listeria monocytogenes
CFSAN117584	c__Bacilli (UID354)	515	329	183	99.45	0.08	100	3050785	0	37	37	126531	126531	82453	82453	333676	333676	37.7	2.83	89.84	11	3037	1	327	1	0	0	0	d__Bacteria;p__Firmicutes;c__Bacilli;o__Lactobacillales;f__Listeriaceae;g__Listeria;s__Listeria monocytogenes_B
CFSAN117588	c__Bacilli (UID354)	515	328	182	99.45	0.27	100	3043136	0	46	46	259414	259414	66155	66155	542863	542863	38	4.98	89.84	11	3039	1	326	1	0	0	0	d__Bacteria;p__Firmicutes;c__Bacilli;o__Lactobacillales;f__Listeriaceae;g__Listeria;s__Listeria monocytogenes
CFSAN119105	c__Bacilli (UID354)	515	329	183	99.45	0	0	2952776	0	46	46	146062	146062	64190	64190	252586	252586	37.8	4.86	89.99	11	2907	1	328	0	0	0	0	d__Bacteria;p__Firmicutes;c__Bacilli;o__Lactobacillales;f__Listeriaceae;g__Listeria;s__Listeria monocytogenes_B
CFSAN119106	c__Bacilli (UID354)	515	328	182	99.45	0	0	3031765	0	31	31	333051	333051	97798	97798	435771	435771	37.9	4.96	89.88	11	3023	1	327	0	0	0	0	d__Bacteria;p__Firmicutes;c__Bacilli;o__Lactobacillales;f__Listeriaceae;g__Listeria;s__Listeria monocytogenes
CFSAN119107	c__Bacilli (UID354)	515	328	182	99.45	0	0	3032317	0	30	30	333140	333140	101077	101077	433192	433192	37.9	4.98	89.88	11	3019	1	327	0	0	0	0	d__Bacteria;p__Firmicutes;c__Bacilli;o__Lactobacillales;f__Listeriaceae;g__Listeria;s__Listeria monocytogenes
CFSAN119110	c__Bacilli (UID354)	515	328	182	99.45	0	0	3026977	0	71	71	90632	90632	42633	42633	342667	342667	37.9	4	89.91	11	3022	1	327	0	0	0	0	d__Bacteria;p__Firmicutes;c__Bacilli;o__Lactobacillales;f__Listeriaceae;g__Listeria;s__Listeria monocytogenes
CFSAN119111	c__Bacilli (UID354)	515	328	182	99.45	0	0	3066386	0	146	146	45638	45638	21002	21002	166878	166878	37.9	3.48	89.97	11	3110	1	327	0	0	0	0	d__Bacteria;p__Firmicutes;c__Bacilli;o__Lactobacillales;f__Listeriaceae;g__Listeria;s__Listeria monocytogenes
CFSAN119113	c__Bacilli (UID354)	515	329	183	99.45	0	0	2948230	0	119	119	46350	46350	24775	24775	156224	156224	37.9	3.73	90.15	11	2924	1	328	0	0	0	0	d__Bacteria;p__Firmicutes;c__Bacilli;o__Lactobacillales;f__Listeriaceae;g__Listeria;s__Listeria monocytogenes_B
CFSAN119117	c__Bacilli (UID354)	515	328	182	99.45	0	0	2993994	0	45	45	179049	179049	66533	66533	418154	418154	38	4.26	89.96	11	2975	1	327	0	0	0	0	d__Bacteria;p__Firmicutes;c__Bacilli;o__Lactobacillales;f__Listeriaceae;g__Listeria;s__Listeria monocytogenes
CFSAN119118	c__Bacilli (UID354)	515	329	183	99.45	0	0	3067595	0	98	98	81768	81768	31301	31301	255745	255745	37.7	3.43	89.88	11	3083	1	328	0	0	0	0	d__Bacteria;p__Firmicutes;c__Bacilli;o__Lactobacillales;f__Listeriaceae;g__Listeria;s__Listeria monocytogenes_B
CFSAN119119	c__Bacilli (UID354)	515	328	182	99.45	0	0	3028416	0	47	47	164109	164109	64434	64434	342444	342444	37.9	5.06	89.89	11	3034	1	327	0	0	0	0	d__Bacteria;p__Firmicutes;c__Bacilli;o__Lactobacillales;f__Listeriaceae;g__Listeria;s__Listeria monocytogenes
CFSAN119120	c__Bacilli (UID354)	515	328	182	99.45	0	0	2951119	0	35	35	176080	176080	84317	84317	540611	540611	38	4.48	90	11	2917	1	327	0	0	0	0	d__Bacteria;p__Firmicutes;c__Bacilli;o__Lactobacillales;f__Listeriaceae;g__Listeria;s__Listeria monocytogenes
CFSAN119122	c__Bacilli (UID354)	515	328	182	99.45	0.27	0	3089166	0	50	50	137780	137780	61783	61783	358592	358592	37.8	4.12	89.67	11	3123	1	326	1	0	0	0	d__Bacteria;p__Firmicutes;c__Bacilli;o__Lactobacillales;f__Listeriaceae;g__Listeria;s__Listeria monocytogenes
CFSAN119123	c__Bacilli (UID354)	515	328	182	99.45	0.27	0	3091950	0	31	31	211582	211582	99740	99740	433975	433975	37.8	4.29	89.67	11	3119	1	326	1	0	0	0	d__Bacteria;p__Firmicutes;c__Bacilli;o__Lactobacillales;f__Listeriaceae;g__Listeria;s__Listeria monocytogenes
CFSAN119134	c__Bacilli (UID354)	515	329	183	99.45	0	0	3054809	0	37	37	205540	205540	82562	82562	524070	524070	37.8	4.13	89.82	11	3035	1	328	0	0	0	0	d__Bacteria;p__Firmicutes;c__Bacilli;o__Lactobacillales;f__Listeriaceae;g__Listeria;s__Listeria monocytogenes_B
CFSAN119135	c__Bacilli (UID354)	515	329	183	99.45	0	0	3049165	0	86	86	76503	76503	35455	35455	255301	255301	37.8	3.44	89.88	11	3047	1	328	0	0	0	0	d__Bacteria;p__Firmicutes;c__Bacilli;o__Lactobacillales;f__Listeriaceae;g__Listeria;s__Listeria monocytogenes_B
CFSAN119136	c__Bacilli (UID354)	515	329	183	99.45	0	0	3054127	0	40	40	225254	225254	76353	76353	449499	449499	37.8	4.46	89.8	11	3033	1	328	0	0	0	0	d__Bacteria;p__Firmicutes;c__Bacilli;o__Lactobacillales;f__Listeriaceae;g__Listeria;s__Listeria monocytogenes_B
CFSAN119137	c__Bacilli (UID354)	515	328	182	99.45	0	0	3031639	0	34	34	260909	260909	89165	89165	510074	510074	37.9	4.33	89.86	11	3034	1	327	0	0	0	0	d__Bacteria;p__Firmicutes;c__Bacilli;o__Lactobacillales;f__Listeriaceae;g__Listeria;s__Listeria monocytogenes
CFSAN119138	c__Bacilli (UID354)	515	328	182	99.45	0	0	3030573	0	34	34	260909	260909	89134	89134	373993	373993	37.9	4.38	89.88	11	3033	1	327	0	0	0	0	d__Bacteria;p__Firmicutes;c__Bacilli;o__Lactobacillales;f__Listeriaceae;g__Listeria;s__Listeria monocytogenes
CFSAN119139	c__Bacilli (UID354)	515	329	183	99.45	0	0	3052706	0	51	51	140940	140940	59856	59856	415601	415601	37.8	3.98	89.82	11	3036	1	328	0	0	0	0	d__Bacteria;p__Firmicutes;c__Bacilli;o__Lactobacillales;f__Listeriaceae;g__Listeria;s__Listeria monocytogenes_B
CFSAN119141	c__Bacilli (UID354)	515	329	183	99.45	0	0	3053598	0	40	40	205846	205846	76339	76339	522659	522659	37.8	4.34	89.82	11	3030	1	328	0	0	0	0	d__Bacteria;p__Firmicutes;c__Bacilli;o__Lactobacillales;f__Listeriaceae;g__Listeria;s__Listeria monocytogenes_B
CFSAN119142	c__Bacilli (UID354)	515	329	183	99.45	0	0	3054861	0	50	50	178350	178350	61097	61097	337830	337830	37.8	3.74	89.79	11	3044	1	328	0	0	0	0	d__Bacteria;p__Firmicutes;c__Bacilli;o__Lactobacillales;f__Listeriaceae;g__Listeria;s__Listeria monocytogenes_B
CFSAN119143	c__Bacilli (UID354)	515	329	183	99.45	0	0	3022939	0	32	32	215353	215353	94466	94466	467012	467012	37.7	5.53	89.85	11	3000	1	328	0	0	0	0	d__Bacteria;p__Firmicutes;c__Bacilli;o__Lactobacillales;f__Listeriaceae;g__Listeria;s__Listeria monocytogenes_B
CFSAN119144	c__Bacilli (UID354)	515	329	183	99.45	0	0	3020233	0	45	45	176219	176219	67116	67116	412470	412470	37.7	4.37	89.88	11	3001	1	328	0	0	0	0	d__Bacteria;p__Firmicutes;c__Bacilli;o__Lactobacillales;f__Listeriaceae;g__Listeria;s__Listeria monocytogenes_B
CFSAN119146	c__Bacilli (UID354)	515	328	182	99.45	0	0	3028721	0	29	29	233415	233415	104438	104438	410264	410264	37.9	4.18	89.89	11	3015	1	327	0	0	0	0	d__Bacteria;p__Firmicutes;c__Bacilli;o__Lactobacillales;f__Listeriaceae;g__Listeria;s__Listeria monocytogenes

## Sheet: Table S2
Supplementary data: Table S2. Sample Information: Source and Type of sample, ST and CC of isolates
SampleID	Species	Industry	Source	Type	Class	ST	abcZ	bglA	cat	dapE	dat	ldh	lhkA	CC	Lineage
CFSAN117454	Listeria monocytogenes	Retail	CHAIN RETAIL	VIENNA	RTE	876	125	1	1	1	3	1	3	CC1	I
CFSAN117456	Listeria monocytogenes	Retail	LARGE RETAIL	MINCED BEEF	RAW	204	5	7	6	4	5	4	1	CC204	II
CFSAN117461	Listeria monocytogenes	Retail	CHAIN RETAIL	MINCED BEEF	RAW	876	125	1	1	1	3	1	3	CC1	I
CFSAN117462	Listeria monocytogenes	Retail	MEDIUM RETAIL	MINCED BEEF	RAW	204	5	7	6	4	5	4	1	CC204	II
CFSAN117464	Listeria monocytogenes	Retail	LARGE RETAIL	WORS	RAW	2	1	1	11	11	2	1	5	CC2	I
CFSAN117466	Listeria monocytogenes	Retail	CHAIN RETAIL	BILTONG	RTE	2	1	1	11	11	2	1	5	CC2	I
CFSAN117470	Listeria monocytogenes	Retail	SMALL RETAIL	BEEF CHUCK	RAW	204	5	7	6	4	5	4	1	CC204	II
CFSAN117471	Listeria monocytogenes	Retail	CHAIN RETAIL	OFFAL	RAW	204	5	7	6	4	5	4	1	CC204	II
CFSAN117472	Listeria monocytogenes	Retail	SMALL RETAIL	MINCED BEEF	RAW	31	7	14	10	19	9	8	1	CC31	II
CFSAN117473	Listeria monocytogenes	Retail	CHAIN RETAIL	BEEF POLONY	RTE	2	1	1	11	11	2	1	5	CC2	I
CFSAN117481	Listeria monocytogenes	Retail	LARGE RETAIL	OFFAL	RAW	204	5	7	6	4	5	4	1	CC204	II
CFSAN117486	Listeria monocytogenes	Retail	MEDIUM RETAIL	WORS	RAW	2	1	1	11	11	2	1	5	CC2	I
CFSAN117490	Listeria monocytogenes	Retail	SMALL RETAIL	BEEF STEAK	RAW	14	8	6	13	6	5	2	1	CC14	II
CFSAN117492	Listeria monocytogenes	Retail	CHAIN RETAIL	MINCED BEEF	RAW	14	8	6	13	6	5	2	1	CC14	II
CFSAN117493	Listeria monocytogenes	Retail	SMALL RETAIL	MINCED BEEF	RAW	204	5	7	6	4	5	4	1	CC204	II
CFSAN117494	Listeria monocytogenes	Retail	SMALL RETAIL	BEEF STEW	RAW	204	5	7	6	4	5	4	1	CC204	II
CFSAN117495	Listeria monocytogenes	Retail	SMALL RETAIL	BEEF BRISKET	RAW	876	125	1	1	1	3	1	3	CC1	I
CFSAN117497	Listeria monocytogenes	Retail	CHAIN RETAIL	BEEF POLONY	RTE	204	5	7	6	4	5	4	1	CC204	II
CFSAN117498	Listeria monocytogenes	Retail	LARGE RETAIL	BEEF POLONY	RTE	204	5	7	6	4	5	4	1	CC204	II
CFSAN117501	Listeria monocytogenes	Retail	LARGE RETAIL	OFFAL	RAW	204	5	7	6	4	5	4	1	CC204	II
CFSAN117503	Listeria monocytogenes	Retail	MEDIUM RETAIL	BEEF POLONY	RTE	204	5	7	6	4	5	4	1	CC204	II
CFSAN117504	Listeria monocytogenes	Retail	CHAIN RETAIL	WORS	RAW	204	5	7	6	4	5	4	1	CC204	II
CFSAN117537	Listeria monocytogenes	Retail	CHAIN RETAIL	MINCED BEEF	RAW	2	1	1	11	11	2	1	5	CC2	I
CFSAN117541	Listeria monocytogenes	Retail	CHAIN RETAIL	BRISKET	RAW	204	5	7	6	4	5	4	1	CC204	II
CFSAN117542	Listeria monocytogenes	Retail	LARGE RETAIL	WORS	RAW	2	1	1	11	11	2	1	5	CC2	I
CFSAN117545	Listeria monocytogenes	Retail	SMALL RETAIL	BEEF POLONY	RTE	1	3	1	1	1	3	1	3	CC1	I
CFSAN117546	Listeria monocytogenes	Retail	LARGE RETAIL	BEEF STEW	RAW	1	3	1	1	1	3	1	3	CC1	I
CFSAN117555	Listeria monocytogenes	Farm	COMMUNAL FARM	ENVIRONMENTAL-FAECES	ENVIRONMENTAL-FAECAL	204	5	7	6	4	5	4	1	CC204	II
CFSAN117559	Listeria monocytogenes	Farm	COMMUNAL FARM	FRESH FAECES	CATTLE-FAECAL	31	7	14	10	19	9	8	1	CC31	II
CFSAN117561	Listeria monocytogenes	Farm	COMMUNAL FARM	ENVIRONMENTAL-FAECES	ENVIRONMENTAL-FAECAL	204	5	7	6	4	5	4	1	CC204	II
CFSAN117565	Listeria monocytogenes	Farm	COW-CALF OPERATION	FRESH FAECES	CATTLE-FAECAL	204	5	7	6	4	5	4	1	CC204	II
CFSAN117567	Listeria monocytogenes	Farm	COW-CALF OPERATION	FRESH FAECES	CATTLE-FAECAL	876	125	1	1	1	3	1	3	CC1	I
CFSAN117571	Listeria monocytogenes	Farm	COW-CALF OPERATION	FEED: GRAIN	FEED-GRAIN	876	125	1	1	1	3	1	3	CC1	I
CFSAN117572	Listeria monocytogenes	Farm	COW-CALF OPERATION	FEED: GRAIN	FEED-GRAIN	204	5	7	6	4	5	4	1	CC204	II
CFSAN117577	Listeria monocytogenes	Farm	COW-CALF OPERATION	FEED: GRAIN	FEED-GRAIN	31	7	14	10	19	9	8	1	CC31	II
CFSAN117584	Listeria monocytogenes	Farm	FEEDLOT FARM	FRESH FAECES	CATTLE-FAECAL	876	125	1	1	1	3	1	3	CC1	I
CFSAN117588	Listeria monocytogenes	Farm	FEEDLOT FARM	ENVIRONMENTAL-WATER	ENVIRONMENTAL-WATER	204	5	7	6	4	5	4	1	CC204	II
CFSAN119105	Listeria monocytogenes	Abattoir	HIGH THROUGHPUT (HT)	FAECAL SWAB	CATTLE-FAECAL	224	11	3	12	38	3	94	2	CC224	I
CFSAN119106	Listeria monocytogenes	Abattoir	HIGH THROUGHPUT (HT)	PRE-EVISCERATION CARCASS SWAB	BEEF-SWAB	204	5	7	6	4	5	4	1	CC204	II
CFSAN119107	Listeria monocytogenes	Abattoir	HIGH THROUGHPUT (HT)	ENVIRONMENTAL-EFFLUENT	EFFLUENT-ENVIRONMENTAL	204	5	7	6	4	5	4	1	CC204	II
CFSAN119110	Listeria monocytogenes	Abattoir	HIGH THROUGHPUT (HT)	PRE-EVISCERATION CARCASS SWAB	BEEF-SWAB	204	5	7	6	4	5	4	1	CC204	II
CFSAN119111	Listeria monocytogenes	Abattoir	HIGH THROUGHPUT (HT)	POST-EVISCERATION CARCASS SWAB	BEEF-SWAB	204	5	7	6	4	5	4	1	CC204	II
CFSAN119113	Listeria monocytogenes	Abattoir	HIGH THROUGHPUT (HT)	ENVIRONMENTAL-EFFLUENT	EFFLUENT-ENVIRONMENTAL	2	1	1	11	11	2	1	5	CC2	I
CFSAN119117	Listeria monocytogenes	Abattoir	HIGH THROUGHPUT (HT)	PRE-EVISCERATION CARCASS SWAB	BEEF-SWAB	204	5	7	6	4	5	4	1	CC204	II
CFSAN119118	Listeria monocytogenes	Abattoir	HIGH THROUGHPUT (HT)	POST-EVISCERATION CARCASS SWAB	BEEF-SWAB	876	125	1	1	1	3	1	3	CC1	I
CFSAN119119	Listeria monocytogenes	Abattoir	HIGH THROUGHPUT (HT)	POST-EVISCERATION CARCASS SWAB	BEEF-SWAB	204	5	7	6	4	5	4	1	CC204	II
CFSAN119120	Listeria monocytogenes	Abattoir	HIGH THROUGHPUT (HT)	CHILLED CARCASS SWAB	BEEF-SWAB	204	5	7	6	4	5	4	1	CC204	II
CFSAN119122	Listeria monocytogenes	Abattoir	HIGH THROUGHPUT (HT)	PRE-EVISCERATION CARCASS SWAB	BEEF-SWAB	31	7	14	10	19	9	8	1	CC31	II
CFSAN119123	Listeria monocytogenes	Abattoir	HIGH THROUGHPUT (HT)	PRE-EVISCERATION CARCASS SWAB	BEEF-SWAB	31	7	14	10	19	9	8	1	CC31	II
CFSAN119134	Listeria monocytogenes	Retail	SMALL RETAIL	WORS	RAW	2	1	1	11	11	2	1	5	CC2	I
CFSAN119135	Listeria monocytogenes	Retail	MEDIUM RETAIL	MINCED BEEF	RAW	2	1	1	11	11	2	1	5	CC2	I
CFSAN119136	Listeria monocytogenes	Retail	SMALL RETAIL	KIDNEY	RAW	2	1	1	11	11	2	1	5	CC2	I
CFSAN119137	Listeria monocytogenes	Retail	CHAIN RETAIL	STIR FRY BEEF	RAW	204	5	7	6	4	5	4	1	CC204	II
CFSAN119138	Listeria monocytogenes	Retail	MEDIUM RETAIL	WORS	RAW	204	5	7	6	4	5	4	1	CC204	II
CFSAN119139	Listeria monocytogenes	Retail	SMALL RETAIL	VIENNA	RAW	2	1	1	11	11	2	1	5	CC2	I
CFSAN119141	Listeria monocytogenes	Retail	MEDIUM RETAIL	BEEF POLONY	RTE	2	1	1	11	11	2	1	5	CC2	I
CFSAN119142	Listeria monocytogenes	Retail	CHAIN RETAIL	BILTONG	RTE	2	1	1	11	11	2	1	5	CC2	I
CFSAN119143	Listeria monocytogenes	Retail	SMALL RETAIL	MINCED BEEF	RAW	1	3	1	1	1	3	1	3	CC1	I
CFSAN119144	Listeria monocytogenes	Retail	MEDIUM RETAIL	SPLEEN	RAW	1	3	1	1	1	3	1	3	CC1	I
CFSAN119146	Listeria monocytogenes	Farm	FEEDLOT FARM	FRESH FAECES	CATTLE-FAECAL	204	5	7	6	4	5	4	1	CC204	II

## Sheet: Table S3
Supplementary Data, Table S3. Distribution of clonal complexes and lineages in 60 L. monocytogenes
recovered from cattle farms, abattoirs, and retail outlets in Gauteng province
			Lineage 1				Lineage 2			p-value
Source	Class of sample	No. of isolates	CC1*	CC2	CC224		CC14	CC31	CC204
Cattle farms	Environmenta	3	0 (0.0)	0 (0.0)	0 (0.0)		0 (0.0)	0 (0.0)	3 (100.0)
(n=11)	Faeces	5	2 (40.0)	0 (0.0)	0 (0.0)		0 (0.0)	1 (20.0)	2 (40.0)
	Feedb	3	1 (33.3)	0 (0.0)	0 (0.0)		0 (0.0)	1 (33.3)	1 (33.3)
		p-value	0.8504	NA	NA		NA	1	0.8504
	Subtotal	11	3 (27.3)	0 (0.0)	0 (0.0)		0 (0.0)	2 (18.2)	6 (54.5)	0.1699
Abattoirs (HT)	Environment	2	0 (0.0)	1 (50.0)	0 (0.0)		0 (0.0)	0 (0.0)	1 (50.0)
(n=12)	Faeces	1	0 (0.0)	0 (0.0)	1 (100.0)		0 (0.0)	0 (0.0)	0 (0.0)
	Carcass swabsc	9	1 (11.1)	0 (0.0)	0 (0.0)		0 (0.0)	2 (22.2)	6 (66.7)
		p-value	1	1	1		NA	1	0.6576
	Subtotal	12	1 (8.3)	1 (8.3)	1 (8.3)		0 (0.0)	2 (16.7)	7 (58.3)	0.0068
Retail outlets	RTEd	10	2 (20.0)	5 (50.0)	0 (0.0)		0 (0.0)	0 (0.0)	3 (30.0)
(N=37)	Milled beef	15	2 (13.3)	6 (40.0)	0 (0.0)		1 (6.7)	1 (6.7)	5 (33.3)
	Raw beef	7	2 (28.6)	0 (0.0)	0 (0.0)		1 (14.3)	0 (0.0)	4 (57.1)
	Offal & Organs	5	1 (20.0)	1 (20.0)	0 (0.0)		0 (0.0)	0 (0.0)	3 (60.0)
		p-value	0.8634	0.5353	NA		0.4118	1	0.4992
	Subtotal	37	7 (18.9)	12 (32.4)	0 (0.0)		2 (5.4)	1 (2.7)	15 (40.5)	4.6e-05
	Grand total	60	11 (18.3)	13 (21.7)	1 (1.7)		2 (3.3)	5 (8.3)	28 (46.7)
		p-value	0.4973	0.1004	1		1	0.1338	0.4751
*ST1 and ST876

## Sheet: Table S4
Supplementary data: Table S4: Virulence factors
Sample	Contig	START	END	STRAND	GENE	COVERAGE	%COVERAGE	%IDENTITY	DATABASE	ACCESSION	PRODUCT
CFSAN117454	NODE_10_length_130391_cov_22.193438	40612	42039	+	iap/cwhA	1-1449/1449	98.34	95.25	vfdb	NP_464110	(iap/cwhA) P60 extracellular protein invasion associated protein Iap [P60 (VF0068) - Invasion (VFC0083)] [Listeria monocytogenes EGD-e]
CFSAN117454	NODE_11_length_106713_cov_24.537453	1155	2411	+	vip	1-1200/1200	100	85.28	vfdb	NP_463850	(vip) surface adhesin Vip [Vip (VF0443) - Invasion (VFC0083)] [Listeria monocytogenes EGD-e]
CFSAN117454	NODE_11_length_106713_cov_24.537453	101944	104406	-	clpC	1-2463/2463	100	94.07	vfdb	NP_463763	(clpC) endopeptidase Clp ATP-binding chain C [ClpC (VF0072) - Stress survival (VFC0282)] [Listeria monocytogenes EGD-e]
CFSAN117454	NODE_12_length_104540_cov_23.316694	24789	26189	-	pdgA	1-1401/1401	100	97	vfdb	NP_463944	(pdgA) Peptidoglycan N-deacetylase [PgdA (VF0442) - Immune modulation (VFC0258)] [Listeria monocytogenes EGD-e]
CFSAN117454	NODE_12_length_104540_cov_23.316694	31575	34046	-	inlF	1-2466/2466	99.96	80.79	vfdb	NP_463939	(inlF) internalin F [InlF (VF0447) - Adherence (VFC0001)] [Listeria monocytogenes EGD-e]
CFSAN117454	NODE_13_length_87879_cov_25.390270	25142	26010	-	plcB	2-870/870	99.89	95.51	vfdb	NP_463736	(plcB) phospholipase C [PlcB (VF0067) - Exotoxin (VFC0235)] [Listeria monocytogenes EGD-e]
CFSAN117454	NODE_13_length_87879_cov_25.390270	28061	29593	-	mpl	1-1533/1533	100	94.85	vfdb	NP_463734	(mpl) Zinc metalloproteinase precursor [Mpl (VF0065) - Exoenzyme (VFC0251)] [Listeria monocytogenes EGD-e]
CFSAN117454	NODE_13_length_87879_cov_25.390270	29924	31513	-	hly	1-1590/1590	100	97.3	vfdb	NP_463733	(hly) listeriolysin O precursor [LLO (VF0064) - Exotoxin (VFC0235)] [Listeria monocytogenes EGD-e]
CFSAN117454	NODE_13_length_87879_cov_25.390270	31756	32709	+	plcA	1-954/954	100	97.38	vfdb	NP_463732	(plcA) phosphatidylinositol-specific phospholipase c [PlcA (VF0063) - Exotoxin (VFC0235)] [Listeria monocytogenes EGD-e]
CFSAN117454	NODE_13_length_87879_cov_25.390270	32982	33695	+	prfA	1-714/714	100	97.62	vfdb	NP_463731	(prfA) listeriolysin positive regulatory protein [PrfA (VF0062) - Regulation (VFC0301)] [Listeria monocytogenes EGD-e]
CFSAN117454	NODE_20_length_32366_cov_20.411582	20136	20753	-	lntA	1-618/618	100	96.12	vfdb	NP_463967	(lntA) listeria nuclear targeted protein A [LntA (VF0440) - Immune modulation (VFC0258)] [Listeria monocytogenes EGD-e]
CFSAN117454	NODE_20_length_32366_cov_20.411582	22455	24345	-	inlB	1-1891/1893	99.89	92.7	vfdb	NP_463963	(inlB) Internalin B [InlB (VF0070) - Invasion (VFC0083)] [Listeria monocytogenes EGD-e]
CFSAN117454	NODE_20_length_32366_cov_20.411582	24430	26832	-	inlA	1-2403/2403	100	96.75	vfdb	NP_463962	(inlA) Internalin A [InlA (VF0069) - Invasion (VFC0083)] [Listeria monocytogenes EGD-e]
CFSAN117454	NODE_2_length_302078_cov_19.836076	233674	236274	+	lap	1-2601/2601	100	97.19	vfdb	NP_465159	(lap) Listeria adhesion protein Lap [Lap (VF0444) - Adherence (VFC0001)] [Listeria monocytogenes EGD-e]
CFSAN117454	NODE_2_length_302078_cov_19.836076	276127	281265	-	lapB	1-5136/5136	100	93.29	vfdb	NP_465191	(lapB) Listeria adhesion protein LapB [LapB (VF0446) - Adherence (VFC0001)] [Listeria monocytogenes EGD-e]
CFSAN117454	NODE_30_length_9028_cov_6.072688	3074	3661	-	llsP	1-588/588	100	93.71	vfdb	AHK25023	(llsP) CAAX amino terminal protease LlsP [LLS (VF0410) - Exotoxin (VFC0235)] [Listeria innocua SLCC6294]
CFSAN117454	NODE_30_length_9028_cov_6.072688	3654	4967	-	llsD	1-1314/1314	100	98.1	vfdb	AHK25022	(llsD) streptolysin-associated protein LlsD [LLS (VF0410) - Exotoxin (VFC0235)] [Listeria innocua SLCC6294]
CFSAN117454	NODE_30_length_9028_cov_6.072688	4960	5877	-	llsY	1-918/918	100	96.19	vfdb	AHK25021	(llsY) LlsY [LLS (VF0410) - Exotoxin (VFC0235)] [Listeria innocua SLCC6294]
CFSAN117454	NODE_30_length_9028_cov_6.072688	5885	6760	-	llsB	1-876/876	100	97.37	vfdb	AHK25020	(llsB) SagB family dehydrogenase LlsB [LLS (VF0410) - Exotoxin (VFC0235)] [Listeria innocua SLCC6294]
CFSAN117454	NODE_30_length_9028_cov_6.072688	6757	7074	-	llsX	1-318/318	100	97.17	vfdb	AHK25019	(llsX) LlsX [LLS (VF0410) - Exotoxin (VFC0235)] [Listeria innocua SLCC6294]
CFSAN117454	NODE_30_length_9028_cov_6.072688	7115	7864	-	llsH	1-750/750	100	97.47	vfdb	AHK25018	(llsH) ABC transporter permease protein LlsH [LLS (VF0410) - Exotoxin (VFC0235)] [Listeria innocua SLCC6294]
CFSAN117454	NODE_30_length_9028_cov_6.072688	7864	8751	-	llsG	1-888/888	100	97.3	vfdb	AHK25017	(llsG) ABC transporter ATP-binding protein LlsG [LLS (VF0410) - Exotoxin (VFC0235)] [Listeria innocua SLCC6294]
CFSAN117454	NODE_30_length_9028_cov_6.072688	8816	8965	-	llsA	1-150/150	100	98	vfdb	AHK25016	(llsA) listeriolysin S [LLS (VF0410) - Exotoxin (VFC0235)] [Listeria innocua SLCC6294]
CFSAN117454	NODE_3_length_283937_cov_22.163106	137215	138192	-	bsh	1-978/978	100	97.75	vfdb	NP_465591	(bsh) bile salt hydrolase [BSH (VF0350) - Stress survival (VFC0282)] [Listeria monocytogenes EGD-e]
CFSAN117454	NODE_3_length_283937_cov_22.163106	269750	271459	-	hbp2	1-1710/1710	100	93.51	vfdb	NP_465709	(hbp2) hypothetical protein [SvpA (VF0263) - Nutritional/Metabolic factor (VFC0272)] [Listeria monocytogenes EGD-e]
CFSAN117454	NODE_3_length_283937_cov_22.163106	271472	272098	-	hbp1/svpA	1-624/624	100	90.27	vfdb	NP_465710	(hbp1/svpA) Haemoglobin binding protein 1 [SvpA (VF0263) - Nutritional/Metabolic factor (VFC0272)] [Listeria monocytogenes EGD-e]
CFSAN117454	NODE_4_length_218142_cov_21.468491	163516	164901	+	hpt	1-1386/1386	100	97.62	vfdb	NP_464364	(hpt) hexose phosphate transport protein [Hpt (VF0264) - Nutritional/Metabolic factor (VFC0272)] [Listeria monocytogenes EGD-e]
CFSAN117454	NODE_5_length_202671_cov_25.278651	41438	41875	+	gtcA	1-438/438	99.54	80.45	vfdb	NP_466072	(gtcA) wall teichoic acid glycosylation protein GtcA [GtcA (VF0607) - Post-translational modification (VFC0315)] [Listeria monocytogenes EGD-e]
CFSAN117454	NODE_5_length_202671_cov_25.278651	121423	122589	-	inlP	1-1167/1167	100	95.2	vfdb	NP_465993	(inlP) internalin P [InlP (VF0577) - Adherence (VFC0001)] [Listeria monocytogenes EGD-e]
CFSAN117454	NODE_5_length_202671_cov_25.278651	124247	124843	-	clpP	1-597/597	100	96.82	vfdb	NP_465991	(clpP) ATP-dependent Clp protease proteolytic subunit [ClpP (VF0074) - Stress survival (VFC0282)] [Listeria monocytogenes EGD-e]
CFSAN117454	NODE_6_length_175439_cov_19.376688	49815	51641	+	inlK	1-1797/1797	100	89	vfdb	NP_464815	(inlK) internalin K [InlK (VF0439) - Immune modulation (VFC0258)] [Listeria monocytogenes EGD-e]
CFSAN117454	NODE_6_length_175439_cov_19.376688	51674	53560	-	oatA	1-1869/1869	100	93.53	vfdb	NP_464816	(oatA) peptidoglycan O-acetyltransferase [OatA (VF0441) - Immune modulation (VFC0258)] [Listeria monocytogenes EGD-e]
CFSAN117454	NODE_7_length_164080_cov_22.717169	6429	7319	-	inlC	1-891/891	100	97.19	vfdb	NP_465311	(inlC) internalin C [InlC (VF0438) - Immune modulation (VFC0258)] [Listeria monocytogenes EGD-e]
CFSAN117454	NODE_7_length_164080_cov_22.717169	49929	51641	+	fbpA	1-1713/1713	100	91.65	vfdb	NP_465354	(fbpA) fibronectin-binding protein [FbpA (VF0349) - Adherence (VFC0001)] [Listeria monocytogenes EGD-e]
CFSAN117454	NODE_7_length_164080_cov_22.717169	66211	66675	-	lspA	1-465/465	100	97.42	vfdb	NP_465369	(lspA) signal peptidase II [Lsp (VF0351) - Post-translational modification (VFC0315)] [Listeria monocytogenes EGD-e]
CFSAN117454	NODE_7_length_164080_cov_22.717169	69600	70532	-	lpeA	1-933/933	100	96.78	vfdb	NP_465372	(lpeA) lipoprotein promoting cell invasion [LpeA (VF0346) - Invasion (VFC0083)] [Listeria monocytogenes EGD-e]
CFSAN117454	NODE_8_length_159009_cov_20.552567	49377	51545	+	clpE	1-2175/2175	99.72	93.47	vfdb	NP_464522	(clpE) ATP-dependent protease [ClpE (VF0073) - Stress survival (VFC0282)] [Listeria monocytogenes EGD-e]
CFSAN117454	NODE_8_length_159009_cov_20.552567	109579	110574	-	lplA1	1-996/996	100	92.77	vfdb	NP_464456	(lplA1) lipoate protein ligase [LplA1 (VF0347) - Nutritional/Metabolic factor (VFC0272)] [Listeria monocytogenes EGD-e]
CFSAN117454	NODE_9_length_149898_cov_22.241462	20109	20990	+	prsA2	1-882/882	100	96.48	vfdb	NP_465743	(prsA2) post translocation chaperone PrsA2 [PrsA2 (VF0449) - Post-translational modification (VFC0315)] [Listeria monocytogenes EGD-e]
CFSAN117456	NODE_11_length_111307_cov_13.738874	88844	90640	+	inlK	1-1797/1797	100	100	vfdb	NP_464815	(inlK) internalin K [InlK (VF0439) - Immune modulation (VFC0258)] [Listeria monocytogenes EGD-e]
CFSAN117456	NODE_11_length_111307_cov_13.738874	90674	92542	-	oatA	1-1869/1869	100	99.57	vfdb	NP_464816	(oatA) peptidoglycan O-acetyltransferase [OatA (VF0441) - Immune modulation (VFC0258)] [Listeria monocytogenes EGD-e]
CFSAN117456	NODE_12_length_111081_cov_14.773375	5286	6728	-	iap/cwhA	1-1449/1449	99.59	99.59	vfdb	NP_464110	(iap/cwhA) P60 extracellular protein invasion associated protein Iap [P60 (VF0068) - Invasion (VFC0083)] [Listeria monocytogenes EGD-e]
CFSAN117456	NODE_19_length_59267_cov_18.118668	54535	56997	-	clpC	1-2463/2463	100	100	vfdb	NP_463763	(clpC) endopeptidase Clp ATP-binding chain C [ClpC (VF0072) - Stress survival (VFC0282)] [Listeria monocytogenes EGD-e]
CFSAN117456	NODE_1_length_217173_cov_13.840439	151563	154163	+	lap	1-2601/2601	100	100	vfdb	NP_465159	(lap) Listeria adhesion protein Lap [Lap (VF0444) - Adherence (VFC0001)] [Listeria monocytogenes EGD-e]
CFSAN117456	NODE_1_length_217173_cov_13.840439	191348	196483	-	lapB	1-5136/5136	100	98.87	vfdb	NP_465191	(lapB) Listeria adhesion protein LapB [LapB (VF0446) - Adherence (VFC0001)] [Listeria monocytogenes EGD-e]
CFSAN117456	NODE_21_length_52096_cov_13.509535	2892	4609	-	aut	1-1719/1719	99.94	99.83	vfdb	NP_464601	(aut) autolysin [Auto (VF0348) - Invasion (VFC0083)] [Listeria monocytogenes EGD-e]
CFSAN117456	NODE_22_length_51815_cov_14.511666	43472	44089	-	lntA	1-618/618	100	99.68	vfdb	NP_463967	(lntA) listeria nuclear targeted protein A [LntA (VF0440) - Immune modulation (VFC0258)] [Listeria monocytogenes EGD-e]
CFSAN117456	NODE_23_length_43183_cov_15.153382	810	2702	-	inlB	1-1893/1893	100	100	vfdb	NP_463963	(inlB) Internalin B [InlB (VF0070) - Invasion (VFC0083)] [Listeria monocytogenes EGD-e]
CFSAN117456	NODE_23_length_43183_cov_15.153382	2787	5189	-	inlA	1-2403/2403	100	100	vfdb	NP_463962	(inlA) Internalin A [InlA (VF0069) - Invasion (VFC0083)] [Listeria monocytogenes EGD-e]
CFSAN117456	NODE_23_length_43183_cov_15.153382	20841	22241	-	pdgA	1-1401/1401	100	100	vfdb	NP_463944	(pdgA) Peptidoglycan N-deacetylase [PgdA (VF0442) - Immune modulation (VFC0258)] [Listeria monocytogenes EGD-e]
CFSAN117456	NODE_23_length_43183_cov_15.153382	27629	30094	-	inlF	1-2466/2466	100	100	vfdb	NP_463939	(inlF) internalin F [InlF (VF0447) - Adherence (VFC0001)] [Listeria monocytogenes EGD-e]
CFSAN117456	NODE_25_length_37522_cov_16.260463	25112	25981	-	plcB	1-870/870	100	100	vfdb	NP_463736	(plcB) phospholipase C [PlcB (VF0067) - Exotoxin (VFC0235)] [Listeria monocytogenes EGD-e]
CFSAN117456	NODE_25_length_37522_cov_16.260463	26017	27936	-	actA	1-1920/1920	100	100	vfdb	NP_463735	(actA) actin-assembly inducing protein precursor [ActA (VF0066) - Motility (VFC0204)] [Listeria monocytogenes EGD-e]
CFSAN117456	NODE_25_length_37522_cov_16.260463	28135	29667	-	mpl	1-1533/1533	100	99.94	vfdb	NP_463734	(mpl) Zinc metalloproteinase precursor [Mpl (VF0065) - Exoenzyme (VFC0251)] [Listeria monocytogenes EGD-e]
CFSAN117456	NODE_25_length_37522_cov_16.260463	29998	31587	-	hly	1-1590/1590	100	100	vfdb	NP_463733	(hly) listeriolysin O precursor [LLO (VF0064) - Exotoxin (VFC0235)] [Listeria monocytogenes EGD-e]
CFSAN117456	NODE_25_length_37522_cov_16.260463	31829	32782	+	plcA	1-954/954	100	100	vfdb	NP_463732	(plcA) phosphatidylinositol-specific phospholipase c [PlcA (VF0063) - Exotoxin (VFC0235)] [Listeria monocytogenes EGD-e]
CFSAN117456	NODE_25_length_37522_cov_16.260463	33053	33766	+	prfA	1-714/714	100	100	vfdb	NP_463731	(prfA) listeriolysin positive regulatory protein [PrfA (VF0062) - Regulation (VFC0301)] [Listeria monocytogenes EGD-e]
CFSAN117456	NODE_26_length_34017_cov_14.645943	13598	14983	+	hpt	1-1386/1386	100	97.83	vfdb	NP_464364	(hpt) hexose phosphate transport protein [Hpt (VF0264) - Nutritional/Metabolic factor (VFC0272)] [Listeria monocytogenes EGD-e]
CFSAN117456	NODE_2_length_196225_cov_15.506655	129826	130803	-	bsh	1-978/978	100	100	vfdb	NP_465591	(bsh) bile salt hydrolase [BSH (VF0350) - Stress survival (VFC0282)] [Listeria monocytogenes EGD-e]
CFSAN117456	NODE_32_length_17154_cov_14.270746	9866	10756	+	inlC	1-891/891	100	100	vfdb	NP_465311	(inlC) internalin C [InlC (VF0438) - Immune modulation (VFC0258)] [Listeria monocytogenes EGD-e]
CFSAN117456	NODE_3_length_195386_cov_19.360706	61823	62419	+	clpP	1-597/597	100	100	vfdb	NP_465991	(clpP) ATP-dependent Clp protease proteolytic subunit [ClpP (VF0074) - Stress survival (VFC0282)] [Listeria monocytogenes EGD-e]
CFSAN117456	NODE_3_length_195386_cov_19.360706	64074	65240	+	inlP	1-1167/1167	100	99.14	vfdb	NP_465993	(inlP) internalin P [InlP (VF0577) - Adherence (VFC0001)] [Listeria monocytogenes EGD-e]
CFSAN117456	NODE_3_length_195386_cov_19.360706	144788	145225	-	gtcA	1-438/438	100	100	vfdb	NP_466072	(gtcA) wall teichoic acid glycosylation protein GtcA [GtcA (VF0607) - Post-translational modification (VFC0315)] [Listeria monocytogenes EGD-e]
CFSAN117456	NODE_3_length_195386_cov_19.360706	154975	157728	+	ami	1-2754/2754	100	99.27	vfdb	NP_466081	(ami) autolysin amidase adhesin [Ami (VF0071) - Adherence (VFC0001)] [Listeria monocytogenes EGD-e]
CFSAN117456	NODE_5_length_181476_cov_15.447954	59469	61178	-	hbp2	1-1710/1710	100	100	vfdb	NP_465709	(hbp2) hypothetical protein [SvpA (VF0263) - Nutritional/Metabolic factor (VFC0272)] [Listeria monocytogenes EGD-e]
CFSAN117456	NODE_5_length_181476_cov_15.447954	61193	61816	-	hbp1/svpA	1-624/624	100	100	vfdb	NP_465710	(hbp1/svpA) Haemoglobin binding protein 1 [SvpA (VF0263) - Nutritional/Metabolic factor (VFC0272)] [Listeria monocytogenes EGD-e]
CFSAN117456	NODE_5_length_181476_cov_15.447954	93899	94780	+	prsA2	1-882/882	100	100	vfdb	NP_465743	(prsA2) post translocation chaperone PrsA2 [PrsA2 (VF0449) - Post-translational modification (VFC0315)] [Listeria monocytogenes EGD-e]
CFSAN117456	NODE_6_length_168042_cov_14.803395	29513	31687	+	clpE	1-2175/2175	100	100	vfdb	NP_464522	(clpE) ATP-dependent protease [ClpE (VF0073) - Stress survival (VFC0282)] [Listeria monocytogenes EGD-e]
CFSAN117456	NODE_6_length_168042_cov_14.803395	88781	89776	-	lplA1	1-996/996	100	100	vfdb	NP_464456	(lplA1) lipoate protein ligase [LplA1 (VF0347) - Nutritional/Metabolic factor (VFC0272)] [Listeria monocytogenes EGD-e]
CFSAN117456	NODE_7_length_158451_cov_16.859996	44480	47035	+	inlJ	1-2556/2556	100	100	vfdb	NP_466343	(inlJ) internalin J [InlJ (VF0445) - Adherence (VFC0001)] [Listeria monocytogenes EGD-e]
CFSAN117456	NODE_8_length_146047_cov_16.317873	91880	92812	+	lpeA	1-933/933	100	100	vfdb	NP_465372	(lpeA) lipoprotein promoting cell invasion [LpeA (VF0346) - Invasion (VFC0083)] [Listeria monocytogenes EGD-e]
CFSAN117456	NODE_8_length_146047_cov_16.317873	95737	96201	+	lspA	1-465/465	100	100	vfdb	NP_465369	(lspA) signal peptidase II [Lsp (VF0351) - Post-translational modification (VFC0315)] [Listeria monocytogenes EGD-e]
CFSAN117456	NODE_8_length_146047_cov_16.317873	110773	112485	-	fbpA	1-1713/1713	100	99.88	vfdb	NP_465354	(fbpA) fibronectin-binding protein [FbpA (VF0349) - Adherence (VFC0001)] [Listeria monocytogenes EGD-e]
CFSAN117461	NODE_10_length_104497_cov_19.014305	24746	26146	-	pdgA	1-1401/1401	100	97	vfdb	NP_463944	(pdgA) Peptidoglycan N-deacetylase [PgdA (VF0442) - Immune modulation (VFC0258)] [Listeria monocytogenes EGD-e]
CFSAN117461	NODE_10_length_104497_cov_19.014305	31532	34003	-	inlF	1-2466/2466	99.96	80.79	vfdb	NP_463939	(inlF) internalin F [InlF (VF0447) - Adherence (VFC0001)] [Listeria monocytogenes EGD-e]
CFSAN117461	NODE_11_length_92294_cov_20.777686	2433	4895	+	clpC	1-2463/2463	100	94.07	vfdb	NP_463763	(clpC) endopeptidase Clp ATP-binding chain C [ClpC (VF0072) - Stress survival (VFC0282)] [Listeria monocytogenes EGD-e]
CFSAN117461	NODE_12_length_92291_cov_17.344668	42977	43972	-	lplA1	1-996/996	100	92.77	vfdb	NP_464456	(lplA1) lipoate protein ligase [LplA1 (VF0347) - Nutritional/Metabolic factor (VFC0272)] [Listeria monocytogenes EGD-e]
CFSAN117461	NODE_13_length_87309_cov_21.002466	53615	54328	-	prfA	1-714/714	100	97.62	vfdb	NP_463731	(prfA) listeriolysin positive regulatory protein [PrfA (VF0062) - Regulation (VFC0301)] [Listeria monocytogenes EGD-e]
CFSAN117461	NODE_13_length_87309_cov_21.002466	54601	55554	-	plcA	1-954/954	100	97.38	vfdb	NP_463732	(plcA) phosphatidylinositol-specific phospholipase c [PlcA (VF0063) - Exotoxin (VFC0235)] [Listeria monocytogenes EGD-e]
CFSAN117461	NODE_13_length_87309_cov_21.002466	55797	57386	+	hly	1-1590/1590	100	97.3	vfdb	NP_463733	(hly) listeriolysin O precursor [LLO (VF0064) - Exotoxin (VFC0235)] [Listeria monocytogenes EGD-e]
CFSAN117461	NODE_13_length_87309_cov_21.002466	57717	59249	+	mpl	1-1533/1533	100	94.85	vfdb	NP_463734	(mpl) Zinc metalloproteinase precursor [Mpl (VF0065) - Exoenzyme (VFC0251)] [Listeria monocytogenes EGD-e]
CFSAN117461	NODE_13_length_87309_cov_21.002466	61300	62168	+	plcB	2-870/870	99.89	95.51	vfdb	NP_463736	(plcB) phospholipase C [PlcB (VF0067) - Exotoxin (VFC0235)] [Listeria monocytogenes EGD-e]
CFSAN117461	NODE_15_length_68661_cov_18.902311	20689	25827	+	lapB	1-5136/5136	100	93.29	vfdb	NP_465191	(lapB) Listeria adhesion protein LapB [LapB (VF0446) - Adherence (VFC0001)] [Listeria monocytogenes EGD-e]
CFSAN117461	NODE_15_length_68661_cov_18.902311	65680	68280	-	lap	1-2601/2601	100	97.19	vfdb	NP_465159	(lap) Listeria adhesion protein Lap [Lap (VF0444) - Adherence (VFC0001)] [Listeria monocytogenes EGD-e]
CFSAN117461	NODE_17_length_57474_cov_17.646311	43322	45031	-	hbp2	1-1710/1710	100	93.51	vfdb	NP_465709	(hbp2) hypothetical protein [SvpA (VF0263) - Nutritional/Metabolic factor (VFC0272)] [Listeria monocytogenes EGD-e]
CFSAN117461	NODE_17_length_57474_cov_17.646311	45044	45670	-	hbp1/svpA	1-624/624	100	90.27	vfdb	NP_465710	(hbp1/svpA) Haemoglobin binding protein 1 [SvpA (VF0263) - Nutritional/Metabolic factor (VFC0272)] [Listeria monocytogenes EGD-e]
CFSAN117461	NODE_1_length_369196_cov_19.394392	6455	7345	-	inlC	1-891/891	100	97.19	vfdb	NP_465311	(inlC) internalin C [InlC (VF0438) - Immune modulation (VFC0258)] [Listeria monocytogenes EGD-e]
CFSAN117461	NODE_1_length_369196_cov_19.394392	49913	51625	+	fbpA	1-1713/1713	100	91.65	vfdb	NP_465354	(fbpA) fibronectin-binding protein [FbpA (VF0349) - Adherence (VFC0001)] [Listeria monocytogenes EGD-e]
CFSAN117461	NODE_1_length_369196_cov_19.394392	66195	66659	-	lspA	1-465/465	100	97.42	vfdb	NP_465369	(lspA) signal peptidase II [Lsp (VF0351) - Post-translational modification (VFC0315)] [Listeria monocytogenes EGD-e]
CFSAN117461	NODE_1_length_369196_cov_19.394392	69584	70516	-	lpeA	1-933/933	100	96.78	vfdb	NP_465372	(lpeA) lipoprotein promoting cell invasion [LpeA (VF0346) - Invasion (VFC0083)] [Listeria monocytogenes EGD-e]
CFSAN117461	NODE_1_length_369196_cov_19.394392	301348	302325	-	bsh	1-978/978	100	97.75	vfdb	NP_465591	(bsh) bile salt hydrolase [BSH (VF0350) - Stress survival (VFC0282)] [Listeria monocytogenes EGD-e]
CFSAN117461	NODE_24_length_28000_cov_13.200086	24562	24711	+	llsA	1-150/150	100	98	vfdb	AHK25016	(llsA) listeriolysin S [LLS (VF0410) - Exotoxin (VFC0235)] [Listeria innocua SLCC6294]
CFSAN117461	NODE_24_length_28000_cov_13.200086	24776	25663	+	llsG	1-888/888	100	97.3	vfdb	AHK25017	(llsG) ABC transporter ATP-binding protein LlsG [LLS (VF0410) - Exotoxin (VFC0235)] [Listeria innocua SLCC6294]
CFSAN117461	NODE_24_length_28000_cov_13.200086	25663	26412	+	llsH	1-750/750	100	97.47	vfdb	AHK25018	(llsH) ABC transporter permease protein LlsH [LLS (VF0410) - Exotoxin (VFC0235)] [Listeria innocua SLCC6294]
CFSAN117461	NODE_24_length_28000_cov_13.200086	26453	26770	+	llsX	1-318/318	100	97.17	vfdb	AHK25019	(llsX) LlsX [LLS (VF0410) - Exotoxin (VFC0235)] [Listeria innocua SLCC6294]
CFSAN117461	NODE_24_length_28000_cov_13.200086	26767	27591	+	llsB	1-825/876	94.18	97.21	vfdb	AHK25020	(llsB) SagB family dehydrogenase LlsB [LLS (VF0410) - Exotoxin (VFC0235)] [Listeria innocua SLCC6294]
CFSAN117461	NODE_27_length_20899_cov_14.472896	15024	17192	-	clpE	1-2175/2175	99.72	93.47	vfdb	NP_464522	(clpE) ATP-dependent protease [ClpE (VF0073) - Stress survival (VFC0282)] [Listeria monocytogenes EGD-e]
CFSAN117461	NODE_33_length_14516_cov_15.775175	12140	13396	-	vip	1-1200/1200	100	85.28	vfdb	NP_463850	(vip) surface adhesin Vip [Vip (VF0443) - Invasion (VFC0083)] [Listeria monocytogenes EGD-e]
CFSAN117461	NODE_3_length_249577_cov_16.360858	1	905	+	llsY	14-918/918	98.58	95.91	vfdb	AHK25021	(llsY) LlsY [LLS (VF0410) - Exotoxin (VFC0235)] [Listeria innocua SLCC6294]
CFSAN117461	NODE_3_length_249577_cov_16.360858	898	2211	+	llsD	1-1314/1314	100	98.1	vfdb	AHK25022	(llsD) streptolysin-associated protein LlsD [LLS (VF0410) - Exotoxin (VFC0235)] [Listeria innocua SLCC6294]
CFSAN117461	NODE_3_length_249577_cov_16.360858	2204	2791	+	llsP	1-588/588	100	93.71	vfdb	AHK25023	(llsP) CAAX amino terminal protease LlsP [LLS (VF0410) - Exotoxin (VFC0235)] [Listeria innocua SLCC6294]
CFSAN117461	NODE_3_length_249577_cov_16.360858	166502	168328	+	inlK	1-1797/1797	100	89	vfdb	NP_464815	(inlK) internalin K [InlK (VF0439) - Immune modulation (VFC0258)] [Listeria monocytogenes EGD-e]
CFSAN117461	NODE_3_length_249577_cov_16.360858	168361	170247	-	oatA	1-1869/1869	100	93.53	vfdb	NP_464816	(oatA) peptidoglycan O-acetyltransferase [OatA (VF0441) - Immune modulation (VFC0258)] [Listeria monocytogenes EGD-e]
CFSAN117461	NODE_4_length_205410_cov_18.153666	57318	58745	+	iap/cwhA	1-1449/1449	98.34	95.25	vfdb	NP_464110	(iap/cwhA) P60 extracellular protein invasion associated protein Iap [P60 (VF0068) - Invasion (VFC0083)] [Listeria monocytogenes EGD-e]
CFSAN117461	NODE_4_length_205410_cov_18.153666	193193	193810	-	lntA	1-618/618	100	96.12	vfdb	NP_463967	(lntA) listeria nuclear targeted protein A [LntA (VF0440) - Immune modulation (VFC0258)] [Listeria monocytogenes EGD-e]
CFSAN117461	NODE_4_length_205410_cov_18.153666	195512	197402	-	inlB	1-1891/1893	99.89	92.65	vfdb	NP_463963	(inlB) Internalin B [InlB (VF0070) - Invasion (VFC0083)] [Listeria monocytogenes EGD-e]
CFSAN117461	NODE_4_length_205410_cov_18.153666	197487	199889	-	inlA	1-2403/2403	100	96.75	vfdb	NP_463962	(inlA) Internalin A [InlA (VF0069) - Invasion (VFC0083)] [Listeria monocytogenes EGD-e]
CFSAN117461	NODE_6_length_181620_cov_17.281151	86649	88034	-	hpt	1-1386/1386	100	97.62	vfdb	NP_464364	(hpt) hexose phosphate transport protein [Hpt (VF0264) - Nutritional/Metabolic factor (VFC0272)] [Listeria monocytogenes EGD-e]
CFSAN117461	NODE_7_length_164130_cov_20.829692	70323	70919	+	clpP	1-597/597	100	96.82	vfdb	NP_465991	(clpP) ATP-dependent Clp protease proteolytic subunit [ClpP (VF0074) - Stress survival (VFC0282)] [Listeria monocytogenes EGD-e]
CFSAN117461	NODE_7_length_164130_cov_20.829692	72577	73743	+	inlP	1-1167/1167	100	95.2	vfdb	NP_465993	(inlP) internalin P [InlP (VF0577) - Adherence (VFC0001)] [Listeria monocytogenes EGD-e]
CFSAN117461	NODE_7_length_164130_cov_20.829692	153291	153728	-	gtcA	1-438/438	99.54	80.45	vfdb	NP_466072	(gtcA) wall teichoic acid glycosylation protein GtcA [GtcA (VF0607) - Post-translational modification (VFC0315)] [Listeria monocytogenes EGD-e]
CFSAN117461	NODE_9_length_109692_cov_18.172519	20217	21098	+	prsA2	1-882/882	100	96.48	vfdb	NP_465743	(prsA2) post translocation chaperone PrsA2 [PrsA2 (VF0449) - Post-translational modification (VFC0315)] [Listeria monocytogenes EGD-e]
CFSAN117462	NODE_13_length_67649_cov_29.195048	35051	37804	-	ami	1-2754/2754	100	99.27	vfdb	NP_466081	(ami) autolysin amidase adhesin [Ami (VF0071) - Adherence (VFC0001)] [Listeria monocytogenes EGD-e]
CFSAN117462	NODE_13_length_67649_cov_29.195048	47554	47991	+	gtcA	1-438/438	100	100	vfdb	NP_466072	(gtcA) wall teichoic acid glycosylation protein GtcA [GtcA (VF0607) - Post-translational modification (VFC0315)] [Listeria monocytogenes EGD-e]
CFSAN117462	NODE_17_length_55934_cov_19.193309	40722	42518	+	inlK	1-1797/1797	100	100	vfdb	NP_464815	(inlK) internalin K [InlK (VF0439) - Immune modulation (VFC0258)] [Listeria monocytogenes EGD-e]
CFSAN117462	NODE_17_length_55934_cov_19.193309	42552	44420	-	oatA	1-1869/1869	100	99.57	vfdb	NP_464816	(oatA) peptidoglycan O-acetyltransferase [OatA (VF0441) - Immune modulation (VFC0258)] [Listeria monocytogenes EGD-e]
CFSAN117462	NODE_20_length_45647_cov_21.175066	37347	37964	-	lntA	1-618/618	100	99.68	vfdb	NP_463967	(lntA) listeria nuclear targeted protein A [LntA (VF0440) - Immune modulation (VFC0258)] [Listeria monocytogenes EGD-e]
CFSAN117462	NODE_21_length_43087_cov_24.708543	13101	15566	+	inlF	1-2466/2466	100	100	vfdb	NP_463939	(inlF) internalin F [InlF (VF0447) - Adherence (VFC0001)] [Listeria monocytogenes EGD-e]
CFSAN117462	NODE_21_length_43087_cov_24.708543	20954	22354	+	pdgA	1-1401/1401	100	100	vfdb	NP_463944	(pdgA) Peptidoglycan N-deacetylase [PgdA (VF0442) - Immune modulation (VFC0258)] [Listeria monocytogenes EGD-e]
CFSAN117462	NODE_21_length_43087_cov_24.708543	38006	40408	+	inlA	1-2403/2403	100	100	vfdb	NP_463962	(inlA) Internalin A [InlA (VF0069) - Invasion (VFC0083)] [Listeria monocytogenes EGD-e]
CFSAN117462	NODE_21_length_43087_cov_24.708543	40493	42385	+	inlB	1-1893/1893	100	100	vfdb	NP_463963	(inlB) Internalin B [InlB (VF0070) - Invasion (VFC0083)] [Listeria monocytogenes EGD-e]
CFSAN117462	NODE_24_length_40198_cov_23.416611	17609	19051	+	iap/cwhA	1-1449/1449	99.59	99.59	vfdb	NP_464110	(iap/cwhA) P60 extracellular protein invasion associated protein Iap [P60 (VF0068) - Invasion (VFC0083)] [Listeria monocytogenes EGD-e]
CFSAN117462	NODE_27_length_37055_cov_25.946788	20691	25826	+	lapB	1-5136/5136	100	98.87	vfdb	NP_465191	(lapB) Listeria adhesion protein LapB [LapB (VF0446) - Adherence (VFC0001)] [Listeria monocytogenes EGD-e]
CFSAN117462	NODE_28_length_36301_cov_21.941892	24371	26971	-	lap	1-2601/2601	100	100	vfdb	NP_465159	(lap) Listeria adhesion protein Lap [Lap (VF0444) - Adherence (VFC0001)] [Listeria monocytogenes EGD-e]
CFSAN117462	NODE_29_length_36020_cov_31.519461	31288	33750	-	clpC	1-2463/2463	100	100	vfdb	NP_463763	(clpC) endopeptidase Clp ATP-binding chain C [ClpC (VF0072) - Stress survival (VFC0282)] [Listeria monocytogenes EGD-e]
CFSAN117462	NODE_2_length_144124_cov_26.970034	91914	92846	+	lpeA	1-933/933	100	100	vfdb	NP_465372	(lpeA) lipoprotein promoting cell invasion [LpeA (VF0346) - Invasion (VFC0083)] [Listeria monocytogenes EGD-e]
CFSAN117462	NODE_2_length_144124_cov_26.970034	95771	96235	+	lspA	1-465/465	100	100	vfdb	NP_465369	(lspA) signal peptidase II [Lsp (VF0351) - Post-translational modification (VFC0315)] [Listeria monocytogenes EGD-e]
CFSAN117462	NODE_2_length_144124_cov_26.970034	110807	112519	-	fbpA	1-1713/1713	100	99.88	vfdb	NP_465354	(fbpA) fibronectin-binding protein [FbpA (VF0349) - Adherence (VFC0001)] [Listeria monocytogenes EGD-e]
CFSAN117462	NODE_31_length_33240_cov_28.841331	65	1018	-	plcA	1-954/954	100	100	vfdb	NP_463732	(plcA) phosphatidylinositol-specific phospholipase c [PlcA (VF0063) - Exotoxin (VFC0235)] [Listeria monocytogenes EGD-e]
CFSAN117462	NODE_31_length_33240_cov_28.841331	1260	2849	+	hly	1-1590/1590	100	100	vfdb	NP_463733	(hly) listeriolysin O precursor [LLO (VF0064) - Exotoxin (VFC0235)] [Listeria monocytogenes EGD-e]
CFSAN117462	NODE_31_length_33240_cov_28.841331	3180	4712	+	mpl	1-1533/1533	100	99.94	vfdb	NP_463734	(mpl) Zinc metalloproteinase precursor [Mpl (VF0065) - Exoenzyme (VFC0251)] [Listeria monocytogenes EGD-e]
CFSAN117462	NODE_31_length_33240_cov_28.841331	4911	6830	+	actA	1-1920/1920	100	100	vfdb	NP_463735	(actA) actin-assembly inducing protein precursor [ActA (VF0066) - Motility (VFC0204)] [Listeria monocytogenes EGD-e]
CFSAN117462	NODE_31_length_33240_cov_28.841331	6866	7735	+	plcB	1-870/870	100	100	vfdb	NP_463736	(plcB) phospholipase C [PlcB (VF0067) - Exotoxin (VFC0235)] [Listeria monocytogenes EGD-e]
CFSAN117462	NODE_33_length_31416_cov_28.445780	215	928	+	prfA	1-714/714	100	100	vfdb	NP_463731	(prfA) listeriolysin positive regulatory protein [PrfA (VF0062) - Regulation (VFC0301)] [Listeria monocytogenes EGD-e]
CFSAN117462	NODE_3_length_139189_cov_21.758992	78075	79070	+	lplA1	1-996/996	100	100	vfdb	NP_464456	(lplA1) lipoate protein ligase [LplA1 (VF0347) - Nutritional/Metabolic factor (VFC0272)] [Listeria monocytogenes EGD-e]
CFSAN117462	NODE_3_length_139189_cov_21.758992	136055	138229	-	clpE	1-2175/2175	100	100	vfdb	NP_464522	(clpE) ATP-dependent protease [ClpE (VF0073) - Stress survival (VFC0282)] [Listeria monocytogenes EGD-e]
CFSAN117462	NODE_46_length_26077_cov_21.659692	23635	25344	-	hbp2	1-1710/1710	100	100	vfdb	NP_465709	(hbp2) hypothetical protein [SvpA (VF0263) - Nutritional/Metabolic factor (VFC0272)] [Listeria monocytogenes EGD-e]
CFSAN117462	NODE_46_length_26077_cov_21.659692	25359	25982	-	hbp1/svpA	1-624/624	100	100	vfdb	NP_465710	(hbp1/svpA) Haemoglobin binding protein 1 [SvpA (VF0263) - Nutritional/Metabolic factor (VFC0272)] [Listeria monocytogenes EGD-e]
CFSAN117462	NODE_4_length_105164_cov_26.800727	87364	89919	-	inlJ	1-2556/2556	100	100	vfdb	NP_466343	(inlJ) internalin J [InlJ (VF0445) - Adherence (VFC0001)] [Listeria monocytogenes EGD-e]
CFSAN117462	NODE_51_length_19904_cov_19.296203	13598	14983	+	hpt	1-1386/1386	100	97.83	vfdb	NP_464364	(hpt) hexose phosphate transport protein [Hpt (VF0264) - Nutritional/Metabolic factor (VFC0272)] [Listeria monocytogenes EGD-e]
CFSAN117462	NODE_53_length_18965_cov_18.660155	139	1856	-	aut	1-1719/1719	99.94	99.83	vfdb	NP_464601	(aut) autolysin [Auto (VF0348) - Invasion (VFC0083)] [Listeria monocytogenes EGD-e]
CFSAN117462	NODE_55_length_16777_cov_22.968168	9492	10382	+	inlC	1-891/891	100	100	vfdb	NP_465311	(inlC) internalin C [InlC (VF0438) - Immune modulation (VFC0258)] [Listeria monocytogenes EGD-e]
CFSAN117462	NODE_5_length_103152_cov_23.947323	36743	37720	-	bsh	1-978/978	100	100	vfdb	NP_465591	(bsh) bile salt hydrolase [BSH (VF0350) - Stress survival (VFC0282)] [Listeria monocytogenes EGD-e]
CFSAN117462	NODE_6_length_95663_cov_27.679786	59771	60937	-	inlP	1-1167/1167	100	99.14	vfdb	NP_465993	(inlP) internalin P [InlP (VF0577) - Adherence (VFC0001)] [Listeria monocytogenes EGD-e]
CFSAN117462	NODE_6_length_95663_cov_27.679786	62592	63188	-	clpP	1-597/597	100	100	vfdb	NP_465991	(clpP) ATP-dependent Clp protease proteolytic subunit [ClpP (VF0074) - Stress survival (VFC0282)] [Listeria monocytogenes EGD-e]
CFSAN117462	NODE_7_length_87751_cov_24.996428	113	994	+	prsA2	1-882/882	100	100	vfdb	NP_465743	(prsA2) post translocation chaperone PrsA2 [PrsA2 (VF0449) - Post-translational modification (VFC0315)] [Listeria monocytogenes EGD-e]
CFSAN117464	NODE_19_length_57950_cov_10.625218	32083	34683	+	lap	1-2601/2601	100	96.85	vfdb	NP_465159	(lap) Listeria adhesion protein Lap [Lap (VF0444) - Adherence (VFC0001)] [Listeria monocytogenes EGD-e]
CFSAN117464	NODE_25_length_42257_cov_15.216924	37364	39826	-	clpC	1-2463/2463	100	94.15	vfdb	NP_463763	(clpC) endopeptidase Clp ATP-binding chain C [ClpC (VF0072) - Stress survival (VFC0282)] [Listeria monocytogenes EGD-e]
CFSAN117464	NODE_26_length_37661_cov_14.099110	25105	25973	-	plcB	2-870/870	99.89	95.63	vfdb	NP_463736	(plcB) phospholipase C [PlcB (VF0067) - Exotoxin (VFC0235)] [Listeria monocytogenes EGD-e]
CFSAN117464	NODE_26_length_37661_cov_14.099110	26012	27929	-	actA	1-1918/1920	99.9	94.21	vfdb	NP_463735	(actA) actin-assembly inducing protein precursor [ActA (VF0066) - Motility (VFC0204)] [Listeria monocytogenes EGD-e]
CFSAN117464	NODE_26_length_37661_cov_14.099110	28129	29661	-	mpl	1-1533/1533	100	94.91	vfdb	NP_463734	(mpl) Zinc metalloproteinase precursor [Mpl (VF0065) - Exoenzyme (VFC0251)] [Listeria monocytogenes EGD-e]
CFSAN117464	NODE_26_length_37661_cov_14.099110	29996	31585	-	hly	1-1590/1590	100	97.36	vfdb	NP_463733	(hly) listeriolysin O precursor [LLO (VF0064) - Exotoxin (VFC0235)] [Listeria monocytogenes EGD-e]
CFSAN117464	NODE_26_length_37661_cov_14.099110	31828	32781	+	plcA	1-954/954	100	97.28	vfdb	NP_463732	(plcA) phosphatidylinositol-specific phospholipase c [PlcA (VF0063) - Exotoxin (VFC0235)] [Listeria monocytogenes EGD-e]
CFSAN117464	NODE_26_length_37661_cov_14.099110	33054	33767	+	prfA	1-714/714	100	97.48	vfdb	NP_463731	(prfA) listeriolysin positive regulatory protein [PrfA (VF0062) - Regulation (VFC0301)] [Listeria monocytogenes EGD-e]
CFSAN117464	NODE_28_length_35252_cov_11.095516	20086	20967	+	prsA2	1-882/882	100	96.37	vfdb	NP_465743	(prsA2) post translocation chaperone PrsA2 [PrsA2 (VF0449) - Post-translational modification (VFC0315)] [Listeria monocytogenes EGD-e]
CFSAN117464	NODE_29_length_35233_cov_12.923603	20685	25841	+	lapB	1-5136/5136	100	93.08	vfdb	NP_465191	(lapB) Listeria adhesion protein LapB [LapB (VF0446) - Adherence (VFC0001)] [Listeria monocytogenes EGD-e]
CFSAN117464	NODE_2_length_133588_cov_12.873776	19523	21235	+	fbpA	1-1713/1713	100	91.71	vfdb	NP_465354	(fbpA) fibronectin-binding protein [FbpA (VF0349) - Adherence (VFC0001)] [Listeria monocytogenes EGD-e]
CFSAN117464	NODE_2_length_133588_cov_12.873776	35806	36270	-	lspA	1-465/465	100	97.42	vfdb	NP_465369	(lspA) signal peptidase II [Lsp (VF0351) - Post-translational modification (VFC0315)] [Listeria monocytogenes EGD-e]
CFSAN117464	NODE_2_length_133588_cov_12.873776	39195	40127	-	lpeA	1-933/933	100	96.68	vfdb	NP_465372	(lpeA) lipoprotein promoting cell invasion [LpeA (VF0346) - Invasion (VFC0083)] [Listeria monocytogenes EGD-e]
CFSAN117464	NODE_33_length_29330_cov_11.421669	20318	20935	-	lntA	1-618/618	100	95.95	vfdb	NP_463967	(lntA) listeria nuclear targeted protein A [LntA (VF0440) - Immune modulation (VFC0258)] [Listeria monocytogenes EGD-e]
CFSAN117464	NODE_33_length_29330_cov_11.421669	22637	24527	-	inlB	1-1891/1893	99.89	92.33	vfdb	NP_463963	(inlB) Internalin B [InlB (VF0070) - Invasion (VFC0083)] [Listeria monocytogenes EGD-e]
CFSAN117464	NODE_33_length_29330_cov_11.421669	24612	27014	-	inlA	1-2403/2403	100	96.75	vfdb	NP_463962	(inlA) Internalin A [InlA (VF0069) - Invasion (VFC0083)] [Listeria monocytogenes EGD-e]
CFSAN117464	NODE_35_length_26919_cov_11.510824	12983	14692	-	hbp2	1-1710/1710	100	93.45	vfdb	NP_465709	(hbp2) hypothetical protein [SvpA (VF0263) - Nutritional/Metabolic factor (VFC0272)] [Listeria monocytogenes EGD-e]
CFSAN117464	NODE_35_length_26919_cov_11.510824	14705	15331	-	hbp1/svpA	1-624/624	100	90.27	vfdb	NP_465710	(hbp1/svpA) Haemoglobin binding protein 1 [SvpA (VF0263) - Nutritional/Metabolic factor (VFC0272)] [Listeria monocytogenes EGD-e]
CFSAN117464	NODE_36_length_26567_cov_11.150378	19382	20767	-	hpt	1-1386/1386	100	97.76	vfdb	NP_464364	(hpt) hexose phosphate transport protein [Hpt (VF0264) - Nutritional/Metabolic factor (VFC0272)] [Listeria monocytogenes EGD-e]
CFSAN117464	NODE_37_length_26470_cov_11.705728	20603	22030	-	iap/cwhA	1-1449/1449	98.34	95.45	vfdb	NP_464110	(iap/cwhA) P60 extracellular protein invasion associated protein Iap [P60 (VF0068) - Invasion (VFC0083)] [Listeria monocytogenes EGD-e]
CFSAN117464	NODE_3_length_108165_cov_11.889539	70063	71040	+	bsh	1-978/978	100	97.75	vfdb	NP_465591	(bsh) bile salt hydrolase [BSH (VF0350) - Stress survival (VFC0282)] [Listeria monocytogenes EGD-e]
CFSAN117464	NODE_45_length_19993_cov_16.658915	4	420	+	gtcA	22-438/438	94.75	80.43	vfdb	NP_466072	(gtcA) wall teichoic acid glycosylation protein GtcA [GtcA (VF0607) - Post-translational modification (VFC0315)] [Listeria monocytogenes EGD-e]
CFSAN117464	NODE_4_length_106610_cov_10.824911	55072	57240	-	clpE	1-2175/2175	99.72	93.66	vfdb	NP_464522	(clpE) ATP-dependent protease [ClpE (VF0073) - Stress survival (VFC0282)] [Listeria monocytogenes EGD-e]
CFSAN117464	NODE_50_length_16867_cov_10.293787	9547	10437	+	inlC	1-891/891	100	97.19	vfdb	NP_465311	(inlC) internalin C [InlC (VF0438) - Immune modulation (VFC0258)] [Listeria monocytogenes EGD-e]
CFSAN117464	NODE_6_length_92625_cov_12.774157	23775	25175	-	pdgA	1-1401/1401	100	97	vfdb	NP_463944	(pdgA) Peptidoglycan N-deacetylase [PgdA (VF0442) - Immune modulation (VFC0258)] [Listeria monocytogenes EGD-e]
CFSAN117464	NODE_6_length_92625_cov_12.774157	30561	33032	-	inlF	1-2466/2466	99.96	80.95	vfdb	NP_463939	(inlF) internalin F [InlF (VF0447) - Adherence (VFC0001)] [Listeria monocytogenes EGD-e]
CFSAN117464	NODE_7_length_82606_cov_11.426690	2890	3885	-	lplA1	1-996/996	100	92.57	vfdb	NP_464456	(lplA1) lipoate protein ligase [LplA1 (VF0347) - Nutritional/Metabolic factor (VFC0272)] [Listeria monocytogenes EGD-e]
CFSAN117464	NODE_83_length_5397_cov_11.733397	1162	2418	+	vip	1-1200/1200	100	85.36	vfdb	NP_463850	(vip) surface adhesin Vip [Vip (VF0443) - Invasion (VFC0083)] [Listeria monocytogenes EGD-e]
CFSAN117464	NODE_86_length_4998_cov_8.551222	300	2120	+	inlK	1-1797/1797	100	89.18	vfdb	NP_464815	(inlK) internalin K [InlK (VF0439) - Immune modulation (VFC0258)] [Listeria monocytogenes EGD-e]
CFSAN117464	NODE_86_length_4998_cov_8.551222	2153	4039	-	oatA	1-1869/1869	100	93.48	vfdb	NP_464816	(oatA) peptidoglycan O-acetyltransferase [OatA (VF0441) - Immune modulation (VFC0258)] [Listeria monocytogenes EGD-e]
CFSAN117464	NODE_8_length_81610_cov_12.974841	59816	60982	-	inlP	1-1167/1167	100	95.29	vfdb	NP_465993	(inlP) internalin P [InlP (VF0577) - Adherence (VFC0001)] [Listeria monocytogenes EGD-e]
CFSAN117464	NODE_8_length_81610_cov_12.974841	62640	63236	-	clpP	1-597/597	100	96.82	vfdb	NP_465991	(clpP) ATP-dependent Clp protease proteolytic subunit [ClpP (VF0074) - Stress survival (VFC0282)] [Listeria monocytogenes EGD-e]
CFSAN117466	NODE_10_length_90312_cov_33.076399	56546	57259	-	prfA	1-714/714	100	97.48	vfdb	NP_463731	(prfA) listeriolysin positive regulatory protein [PrfA (VF0062) - Regulation (VFC0301)] [Listeria monocytogenes EGD-e]
CFSAN117466	NODE_10_length_90312_cov_33.076399	57532	58485	-	plcA	1-954/954	100	97.28	vfdb	NP_463732	(plcA) phosphatidylinositol-specific phospholipase c [PlcA (VF0063) - Exotoxin (VFC0235)] [Listeria monocytogenes EGD-e]
CFSAN117466	NODE_10_length_90312_cov_33.076399	58728	60317	+	hly	1-1590/1590	100	97.36	vfdb	NP_463733	(hly) listeriolysin O precursor [LLO (VF0064) - Exotoxin (VFC0235)] [Listeria monocytogenes EGD-e]
CFSAN117466	NODE_10_length_90312_cov_33.076399	60652	62184	+	mpl	1-1533/1533	100	94.91	vfdb	NP_463734	(mpl) Zinc metalloproteinase precursor [Mpl (VF0065) - Exoenzyme (VFC0251)] [Listeria monocytogenes EGD-e]
CFSAN117466	NODE_10_length_90312_cov_33.076399	62384	64301	+	actA	1-1918/1920	99.9	94.21	vfdb	NP_463735	(actA) actin-assembly inducing protein precursor [ActA (VF0066) - Motility (VFC0204)] [Listeria monocytogenes EGD-e]
CFSAN117466	NODE_10_length_90312_cov_33.076399	64340	65208	+	plcB	2-870/870	99.89	95.63	vfdb	NP_463736	(plcB) phospholipase C [PlcB (VF0067) - Exotoxin (VFC0235)] [Listeria monocytogenes EGD-e]
CFSAN117466	NODE_11_length_88592_cov_24.343707	5088	6473	-	hpt	1-1386/1386	100	97.76	vfdb	NP_464364	(hpt) hexose phosphate transport protein [Hpt (VF0264) - Nutritional/Metabolic factor (VFC0272)] [Listeria monocytogenes EGD-e]
CFSAN117466	NODE_13_length_81098_cov_27.035185	5369	7771	+	inlA	1-2403/2403	100	96.75	vfdb	NP_463962	(inlA) Internalin A [InlA (VF0069) - Invasion (VFC0083)] [Listeria monocytogenes EGD-e]
CFSAN117466	NODE_13_length_81098_cov_27.035185	7856	9746	+	inlB	1-1891/1893	99.89	92.33	vfdb	NP_463963	(inlB) Internalin B [InlB (VF0070) - Invasion (VFC0083)] [Listeria monocytogenes EGD-e]
CFSAN117466	NODE_13_length_81098_cov_27.035185	11448	12065	+	lntA	1-618/618	100	95.95	vfdb	NP_463967	(lntA) listeria nuclear targeted protein A [LntA (VF0440) - Immune modulation (VFC0258)] [Listeria monocytogenes EGD-e]
CFSAN117466	NODE_1_length_481622_cov_22.138620	20685	25841	+	lapB	1-5136/5136	100	93.08	vfdb	NP_465191	(lapB) Listeria adhesion protein LapB [LapB (VF0446) - Adherence (VFC0001)] [Listeria monocytogenes EGD-e]
CFSAN117466	NODE_1_length_481622_cov_22.138620	65698	68298	-	lap	1-2601/2601	100	96.85	vfdb	NP_465159	(lap) Listeria adhesion protein Lap [Lap (VF0444) - Adherence (VFC0001)] [Listeria monocytogenes EGD-e]
CFSAN117466	NODE_1_length_481622_cov_22.138620	423927	425813	+	oatA	1-1869/1869	100	93.48	vfdb	NP_464816	(oatA) peptidoglycan O-acetyltransferase [OatA (VF0441) - Immune modulation (VFC0258)] [Listeria monocytogenes EGD-e]
CFSAN117466	NODE_1_length_481622_cov_22.138620	425846	427666	-	inlK	1-1797/1797	100	89.18	vfdb	NP_464815	(inlK) internalin K [InlK (VF0439) - Immune modulation (VFC0258)] [Listeria monocytogenes EGD-e]
CFSAN117466	NODE_20_length_17295_cov_23.672996	6428	7318	-	inlC	1-891/891	100	97.19	vfdb	NP_465311	(inlC) internalin C [InlC (VF0438) - Immune modulation (VFC0258)] [Listeria monocytogenes EGD-e]
CFSAN117466	NODE_3_length_354891_cov_26.114073	32902	34614	+	fbpA	1-1713/1713	100	91.71	vfdb	NP_465354	(fbpA) fibronectin-binding protein [FbpA (VF0349) - Adherence (VFC0001)] [Listeria monocytogenes EGD-e]
CFSAN117466	NODE_3_length_354891_cov_26.114073	49185	49649	-	lspA	1-465/465	100	97.42	vfdb	NP_465369	(lspA) signal peptidase II [Lsp (VF0351) - Post-translational modification (VFC0315)] [Listeria monocytogenes EGD-e]
CFSAN117466	NODE_3_length_354891_cov_26.114073	52574	53506	-	lpeA	1-933/933	100	96.68	vfdb	NP_465372	(lpeA) lipoprotein promoting cell invasion [LpeA (VF0346) - Invasion (VFC0083)] [Listeria monocytogenes EGD-e]
CFSAN117466	NODE_3_length_354891_cov_26.114073	284475	285452	-	bsh	1-978/978	100	97.75	vfdb	NP_465591	(bsh) bile salt hydrolase [BSH (VF0350) - Stress survival (VFC0282)] [Listeria monocytogenes EGD-e]
CFSAN117466	NODE_4_length_239841_cov_29.671425	24313	25713	-	pdgA	1-1401/1401	100	97	vfdb	NP_463944	(pdgA) Peptidoglycan N-deacetylase [PgdA (VF0442) - Immune modulation (VFC0258)] [Listeria monocytogenes EGD-e]
CFSAN117466	NODE_4_length_239841_cov_29.671425	31099	33570	-	inlF	1-2466/2466	99.96	80.95	vfdb	NP_463939	(inlF) internalin F [InlF (VF0447) - Adherence (VFC0001)] [Listeria monocytogenes EGD-e]
CFSAN117466	NODE_4_length_239841_cov_29.671425	123531	124787	+	vip	1-1200/1200	100	85.36	vfdb	NP_463850	(vip) surface adhesin Vip [Vip (VF0443) - Invasion (VFC0083)] [Listeria monocytogenes EGD-e]
CFSAN117466	NODE_4_length_239841_cov_29.671425	234948	237410	-	clpC	1-2463/2463	100	94.15	vfdb	NP_463763	(clpC) endopeptidase Clp ATP-binding chain C [ClpC (VF0072) - Stress survival (VFC0282)] [Listeria monocytogenes EGD-e]
CFSAN117466	NODE_5_length_225254_cov_26.334051	66175	67602	-	iap/cwhA	1-1449/1449	98.34	95.45	vfdb	NP_464110	(iap/cwhA) P60 extracellular protein invasion associated protein Iap [P60 (VF0068) - Invasion (VFC0083)] [Listeria monocytogenes EGD-e]
CFSAN117466	NODE_6_length_219724_cov_24.458153	65661	67829	+	clpE	1-2175/2175	99.72	93.66	vfdb	NP_464522	(clpE) ATP-dependent protease [ClpE (VF0073) - Stress survival (VFC0282)] [Listeria monocytogenes EGD-e]
CFSAN117466	NODE_6_length_219724_cov_24.458153	125859	126854	-	lplA1	1-996/996	100	92.57	vfdb	NP_464456	(lplA1) lipoate protein ligase [LplA1 (VF0347) - Nutritional/Metabolic factor (VFC0272)] [Listeria monocytogenes EGD-e]
CFSAN117466	NODE_7_length_150923_cov_26.402584	62163	63872	-	hbp2	1-1710/1710	100	93.45	vfdb	NP_465709	(hbp2) hypothetical protein [SvpA (VF0263) - Nutritional/Metabolic factor (VFC0272)] [Listeria monocytogenes EGD-e]
CFSAN117466	NODE_7_length_150923_cov_26.402584	63885	64511	-	hbp1/svpA	1-624/624	100	90.27	vfdb	NP_465710	(hbp1/svpA) Haemoglobin binding protein 1 [SvpA (VF0263) - Nutritional/Metabolic factor (VFC0272)] [Listeria monocytogenes EGD-e]
CFSAN117466	NODE_7_length_150923_cov_26.402584	96592	97473	+	prsA2	1-882/882	100	96.37	vfdb	NP_465743	(prsA2) post translocation chaperone PrsA2 [PrsA2 (VF0449) - Post-translational modification (VFC0315)] [Listeria monocytogenes EGD-e]
CFSAN117466	NODE_8_length_143436_cov_32.300867	41656	42093	+	gtcA	1-438/438	99.54	80.45	vfdb	NP_466072	(gtcA) wall teichoic acid glycosylation protein GtcA [GtcA (VF0607) - Post-translational modification (VFC0315)] [Listeria monocytogenes EGD-e]
CFSAN117466	NODE_8_length_143436_cov_32.300867	121642	122808	-	inlP	1-1167/1167	100	95.29	vfdb	NP_465993	(inlP) internalin P [InlP (VF0577) - Adherence (VFC0001)] [Listeria monocytogenes EGD-e]
CFSAN117466	NODE_8_length_143436_cov_32.300867	124466	125062	-	clpP	1-597/597	100	96.82	vfdb	NP_465991	(clpP) ATP-dependent Clp protease proteolytic subunit [ClpP (VF0074) - Stress survival (VFC0282)] [Listeria monocytogenes EGD-e]
CFSAN117470	NODE_12_length_86899_cov_37.966959	82134	84596	-	clpC	1-2463/2463	100	100	vfdb	NP_463763	(clpC) endopeptidase Clp ATP-binding chain C [ClpC (VF0072) - Stress survival (VFC0282)] [Listeria monocytogenes EGD-e]
CFSAN117470	NODE_16_length_64254_cov_37.059897	30489	31202	-	prfA	1-714/714	100	100	vfdb	NP_463731	(prfA) listeriolysin positive regulatory protein [PrfA (VF0062) - Regulation (VFC0301)] [Listeria monocytogenes EGD-e]
CFSAN117470	NODE_16_length_64254_cov_37.059897	31473	32426	-	plcA	1-954/954	100	100	vfdb	NP_463732	(plcA) phosphatidylinositol-specific phospholipase c [PlcA (VF0063) - Exotoxin (VFC0235)] [Listeria monocytogenes EGD-e]
CFSAN117470	NODE_16_length_64254_cov_37.059897	32668	34257	+	hly	1-1590/1590	100	100	vfdb	NP_463733	(hly) listeriolysin O precursor [LLO (VF0064) - Exotoxin (VFC0235)] [Listeria monocytogenes EGD-e]
CFSAN117470	NODE_16_length_64254_cov_37.059897	34588	36120	+	mpl	1-1533/1533	100	99.94	vfdb	NP_463734	(mpl) Zinc metalloproteinase precursor [Mpl (VF0065) - Exoenzyme (VFC0251)] [Listeria monocytogenes EGD-e]
CFSAN117470	NODE_16_length_64254_cov_37.059897	36319	38238	+	actA	1-1920/1920	100	100	vfdb	NP_463735	(actA) actin-assembly inducing protein precursor [ActA (VF0066) - Motility (VFC0204)] [Listeria monocytogenes EGD-e]
CFSAN117470	NODE_16_length_64254_cov_37.059897	38274	39143	+	plcB	1-870/870	100	100	vfdb	NP_463736	(plcB) phospholipase C [PlcB (VF0067) - Exotoxin (VFC0235)] [Listeria monocytogenes EGD-e]
CFSAN117470	NODE_1_length_438064_cov_36.712979	206978	209533	-	inlJ	1-2556/2556	100	100	vfdb	NP_466343	(inlJ) internalin J [InlJ (VF0445) - Adherence (VFC0001)] [Listeria monocytogenes EGD-e]
CFSAN117470	NODE_2_length_435771_cov_32.124184	232013	233455	+	iap/cwhA	1-1449/1449	99.59	99.59	vfdb	NP_464110	(iap/cwhA) P60 extracellular protein invasion associated protein Iap [P60 (VF0068) - Invasion (VFC0083)] [Listeria monocytogenes EGD-e]
CFSAN117470	NODE_2_length_435771_cov_32.124184	384176	384793	-	lntA	1-618/618	100	99.68	vfdb	NP_463967	(lntA) listeria nuclear targeted protein A [LntA (VF0440) - Immune modulation (VFC0258)] [Listeria monocytogenes EGD-e]
CFSAN117470	NODE_2_length_435771_cov_32.124184	393398	395290	-	inlB	1-1893/1893	100	100	vfdb	NP_463963	(inlB) Internalin B [InlB (VF0070) - Invasion (VFC0083)] [Listeria monocytogenes EGD-e]
CFSAN117470	NODE_2_length_435771_cov_32.124184	395375	397777	-	inlA	1-2403/2403	100	100	vfdb	NP_463962	(inlA) Internalin A [InlA (VF0069) - Invasion (VFC0083)] [Listeria monocytogenes EGD-e]
CFSAN117470	NODE_2_length_435771_cov_32.124184	413429	414829	-	pdgA	1-1401/1401	100	100	vfdb	NP_463944	(pdgA) Peptidoglycan N-deacetylase [PgdA (VF0442) - Immune modulation (VFC0258)] [Listeria monocytogenes EGD-e]
CFSAN117470	NODE_2_length_435771_cov_32.124184	420217	422682	-	inlF	1-2466/2466	100	100	vfdb	NP_463939	(inlF) internalin F [InlF (VF0447) - Adherence (VFC0001)] [Listeria monocytogenes EGD-e]
CFSAN117470	NODE_3_length_433103_cov_34.236757	11792	12415	+	hbp1/svpA	1-624/624	100	100	vfdb	NP_465710	(hbp1/svpA) Haemoglobin binding protein 1 [SvpA (VF0263) - Nutritional/Metabolic factor (VFC0272)] [Listeria monocytogenes EGD-e]
CFSAN117470	NODE_3_length_433103_cov_34.236757	12430	14139	+	hbp2	1-1710/1710	100	100	vfdb	NP_465709	(hbp2) hypothetical protein [SvpA (VF0263) - Nutritional/Metabolic factor (VFC0272)] [Listeria monocytogenes EGD-e]
CFSAN117470	NODE_3_length_433103_cov_34.236757	139114	140091	+	bsh	1-978/978	100	100	vfdb	NP_465591	(bsh) bile salt hydrolase [BSH (VF0350) - Stress survival (VFC0282)] [Listeria monocytogenes EGD-e]
CFSAN117470	NODE_3_length_433103_cov_34.236757	361784	362716	+	lpeA	1-933/933	100	100	vfdb	NP_465372	(lpeA) lipoprotein promoting cell invasion [LpeA (VF0346) - Invasion (VFC0083)] [Listeria monocytogenes EGD-e]
CFSAN117470	NODE_3_length_433103_cov_34.236757	365641	366105	+	lspA	1-465/465	100	100	vfdb	NP_465369	(lspA) signal peptidase II [Lsp (VF0351) - Post-translational modification (VFC0315)] [Listeria monocytogenes EGD-e]
CFSAN117470	NODE_3_length_433103_cov_34.236757	380677	382389	-	fbpA	1-1713/1713	100	99.88	vfdb	NP_465354	(fbpA) fibronectin-binding protein [FbpA (VF0349) - Adherence (VFC0001)] [Listeria monocytogenes EGD-e]
CFSAN117470	NODE_3_length_433103_cov_34.236757	425421	426311	+	inlC	1-891/891	100	100	vfdb	NP_465311	(inlC) internalin C [InlC (VF0438) - Immune modulation (VFC0258)] [Listeria monocytogenes EGD-e]
CFSAN117470	NODE_4_length_277112_cov_30.716761	25881	27598	-	aut	1-1719/1719	99.94	99.83	vfdb	NP_464601	(aut) autolysin [Auto (VF0348) - Invasion (VFC0083)] [Listeria monocytogenes EGD-e]
CFSAN117470	NODE_4_length_277112_cov_30.716761	104594	106768	+	clpE	1-2175/2175	100	100	vfdb	NP_464522	(clpE) ATP-dependent protease [ClpE (VF0073) - Stress survival (VFC0282)] [Listeria monocytogenes EGD-e]
CFSAN117470	NODE_4_length_277112_cov_30.716761	163862	164857	-	lplA1	1-996/996	100	100	vfdb	NP_464456	(lplA1) lipoate protein ligase [LplA1 (VF0347) - Nutritional/Metabolic factor (VFC0272)] [Listeria monocytogenes EGD-e]
CFSAN117470	NODE_4_length_277112_cov_30.716761	262131	263516	-	hpt	1-1386/1386	100	97.83	vfdb	NP_464364	(hpt) hexose phosphate transport protein [Hpt (VF0264) - Nutritional/Metabolic factor (VFC0272)] [Listeria monocytogenes EGD-e]
CFSAN117470	NODE_5_length_232658_cov_37.104524	101572	102168	+	clpP	1-597/597	100	100	vfdb	NP_465991	(clpP) ATP-dependent Clp protease proteolytic subunit [ClpP (VF0074) - Stress survival (VFC0282)] [Listeria monocytogenes EGD-e]
CFSAN117470	NODE_5_length_232658_cov_37.104524	103823	104989	+	inlP	1-1167/1167	100	99.14	vfdb	NP_465993	(inlP) internalin P [InlP (VF0577) - Adherence (VFC0001)] [Listeria monocytogenes EGD-e]
CFSAN117470	NODE_5_length_232658_cov_37.104524	184537	184974	-	gtcA	1-438/438	100	100	vfdb	NP_466072	(gtcA) wall teichoic acid glycosylation protein GtcA [GtcA (VF0607) - Post-translational modification (VFC0315)] [Listeria monocytogenes EGD-e]
CFSAN117470	NODE_5_length_232658_cov_37.104524	194724	197477	+	ami	1-2754/2754	100	99.27	vfdb	NP_466081	(ami) autolysin amidase adhesin [Ami (VF0071) - Adherence (VFC0001)] [Listeria monocytogenes EGD-e]
CFSAN117470	NODE_6_length_175597_cov_30.084898	49168	50964	+	inlK	1-1797/1797	100	100	vfdb	NP_464815	(inlK) internalin K [InlK (VF0439) - Immune modulation (VFC0258)] [Listeria monocytogenes EGD-e]
CFSAN117470	NODE_6_length_175597_cov_30.084898	50998	52866	-	oatA	1-1869/1869	100	99.57	vfdb	NP_464816	(oatA) peptidoglycan O-acetyltransferase [OatA (VF0441) - Immune modulation (VFC0258)] [Listeria monocytogenes EGD-e]
CFSAN117470	NODE_8_length_109552_cov_34.351419	20300	21181	+	prsA2	1-882/882	100	100	vfdb	NP_465743	(prsA2) post translocation chaperone PrsA2 [PrsA2 (VF0449) - Post-translational modification (VFC0315)] [Listeria monocytogenes EGD-e]
CFSAN117470	NODE_9_length_101942_cov_31.399057	36332	38932	+	lap	1-2601/2601	100	100	vfdb	NP_465159	(lap) Listeria adhesion protein Lap [Lap (VF0444) - Adherence (VFC0001)] [Listeria monocytogenes EGD-e]
CFSAN117470	NODE_9_length_101942_cov_31.399057	76117	81252	-	lapB	1-5136/5136	100	98.87	vfdb	NP_465191	(lapB) Listeria adhesion protein LapB [LapB (VF0446) - Adherence (VFC0001)] [Listeria monocytogenes EGD-e]
CFSAN117471	NODE_13_length_64254_cov_37.243392	30489	31202	-	prfA	1-714/714	100	100	vfdb	NP_463731	(prfA) listeriolysin positive regulatory protein [PrfA (VF0062) - Regulation (VFC0301)] [Listeria monocytogenes EGD-e]
CFSAN117471	NODE_13_length_64254_cov_37.243392	31473	32426	-	plcA	1-954/954	100	100	vfdb	NP_463732	(plcA) phosphatidylinositol-specific phospholipase c [PlcA (VF0063) - Exotoxin (VFC0235)] [Listeria monocytogenes EGD-e]
CFSAN117471	NODE_13_length_64254_cov_37.243392	32668	34257	+	hly	1-1590/1590	100	100	vfdb	NP_463733	(hly) listeriolysin O precursor [LLO (VF0064) - Exotoxin (VFC0235)] [Listeria monocytogenes EGD-e]
CFSAN117471	NODE_13_length_64254_cov_37.243392	34588	36120	+	mpl	1-1533/1533	100	99.94	vfdb	NP_463734	(mpl) Zinc metalloproteinase precursor [Mpl (VF0065) - Exoenzyme (VFC0251)] [Listeria monocytogenes EGD-e]
CFSAN117471	NODE_13_length_64254_cov_37.243392	36319	38238	+	actA	1-1920/1920	100	100	vfdb	NP_463735	(actA) actin-assembly inducing protein precursor [ActA (VF0066) - Motility (VFC0204)] [Listeria monocytogenes EGD-e]
CFSAN117471	NODE_13_length_64254_cov_37.243392	38274	39143	+	plcB	1-870/870	100	100	vfdb	NP_463736	(plcB) phospholipase C [PlcB (VF0067) - Exotoxin (VFC0235)] [Listeria monocytogenes EGD-e]
CFSAN117471	NODE_14_length_49385_cov_32.971132	7700	8317	+	lntA	1-618/618	100	99.68	vfdb	NP_463967	(lntA) listeria nuclear targeted protein A [LntA (VF0440) - Immune modulation (VFC0258)] [Listeria monocytogenes EGD-e]
CFSAN117471	NODE_15_length_43262_cov_34.965156	889	2781	-	inlB	1-1893/1893	100	100	vfdb	NP_463963	(inlB) Internalin B [InlB (VF0070) - Invasion (VFC0083)] [Listeria monocytogenes EGD-e]
CFSAN117471	NODE_15_length_43262_cov_34.965156	2866	5268	-	inlA	1-2403/2403	100	100	vfdb	NP_463962	(inlA) Internalin A [InlA (VF0069) - Invasion (VFC0083)] [Listeria monocytogenes EGD-e]
CFSAN117471	NODE_15_length_43262_cov_34.965156	20920	22320	-	pdgA	1-1401/1401	100	100	vfdb	NP_463944	(pdgA) Peptidoglycan N-deacetylase [PgdA (VF0442) - Immune modulation (VFC0258)] [Listeria monocytogenes EGD-e]
CFSAN117471	NODE_15_length_43262_cov_34.965156	27708	30173	-	inlF	1-2466/2466	100	100	vfdb	NP_463939	(inlF) internalin F [InlF (VF0447) - Adherence (VFC0001)] [Listeria monocytogenes EGD-e]
CFSAN117471	NODE_1_length_542863_cov_36.316286	88588	89469	-	prsA2	1-882/882	100	100	vfdb	NP_465743	(prsA2) post translocation chaperone PrsA2 [PrsA2 (VF0449) - Post-translational modification (VFC0315)] [Listeria monocytogenes EGD-e]
CFSAN117471	NODE_1_length_542863_cov_36.316286	121552	122175	+	hbp1/svpA	1-624/624	100	100	vfdb	NP_465710	(hbp1/svpA) Haemoglobin binding protein 1 [SvpA (VF0263) - Nutritional/Metabolic factor (VFC0272)] [Listeria monocytogenes EGD-e]
CFSAN117471	NODE_1_length_542863_cov_36.316286	122190	123899	+	hbp2	1-1710/1710	100	100	vfdb	NP_465709	(hbp2) hypothetical protein [SvpA (VF0263) - Nutritional/Metabolic factor (VFC0272)] [Listeria monocytogenes EGD-e]
CFSAN117471	NODE_1_length_542863_cov_36.316286	248874	249851	+	bsh	1-978/978	100	100	vfdb	NP_465591	(bsh) bile salt hydrolase [BSH (VF0350) - Stress survival (VFC0282)] [Listeria monocytogenes EGD-e]
CFSAN117471	NODE_1_length_542863_cov_36.316286	471544	472476	+	lpeA	1-933/933	100	100	vfdb	NP_465372	(lpeA) lipoprotein promoting cell invasion [LpeA (VF0346) - Invasion (VFC0083)] [Listeria monocytogenes EGD-e]
CFSAN117471	NODE_1_length_542863_cov_36.316286	475401	475865	+	lspA	1-465/465	100	100	vfdb	NP_465369	(lspA) signal peptidase II [Lsp (VF0351) - Post-translational modification (VFC0315)] [Listeria monocytogenes EGD-e]
CFSAN117471	NODE_1_length_542863_cov_36.316286	490437	492149	-	fbpA	1-1713/1713	100	99.88	vfdb	NP_465354	(fbpA) fibronectin-binding protein [FbpA (VF0349) - Adherence (VFC0001)] [Listeria monocytogenes EGD-e]
CFSAN117471	NODE_1_length_542863_cov_36.316286	535181	536071	+	inlC	1-891/891	100	100	vfdb	NP_465311	(inlC) internalin C [InlC (VF0438) - Immune modulation (VFC0258)] [Listeria monocytogenes EGD-e]
CFSAN117471	NODE_2_length_343128_cov_34.384815	109663	111105	-	iap/cwhA	1-1449/1449	99.59	99.59	vfdb	NP_464110	(iap/cwhA) P60 extracellular protein invasion associated protein Iap [P60 (VF0068) - Invasion (VFC0083)] [Listeria monocytogenes EGD-e]
CFSAN117471	NODE_3_length_342799_cov_37.965054	228435	230990	+	inlJ	1-2556/2556	100	100	vfdb	NP_466343	(inlJ) internalin J [InlJ (VF0445) - Adherence (VFC0001)] [Listeria monocytogenes EGD-e]
CFSAN117471	NODE_4_length_277100_cov_32.958527	25868	27585	-	aut	1-1719/1719	99.94	99.83	vfdb	NP_464601	(aut) autolysin [Auto (VF0348) - Invasion (VFC0083)] [Listeria monocytogenes EGD-e]
CFSAN117471	NODE_4_length_277100_cov_32.958527	104581	106755	+	clpE	1-2175/2175	100	100	vfdb	NP_464522	(clpE) ATP-dependent protease [ClpE (VF0073) - Stress survival (VFC0282)] [Listeria monocytogenes EGD-e]
CFSAN117471	NODE_4_length_277100_cov_32.958527	163849	164844	-	lplA1	1-996/996	100	100	vfdb	NP_464456	(lplA1) lipoate protein ligase [LplA1 (VF0347) - Nutritional/Metabolic factor (VFC0272)] [Listeria monocytogenes EGD-e]
CFSAN117471	NODE_4_length_277100_cov_32.958527	262118	263503	-	hpt	1-1386/1386	100	97.83	vfdb	NP_464364	(hpt) hexose phosphate transport protein [Hpt (VF0264) - Nutritional/Metabolic factor (VFC0272)] [Listeria monocytogenes EGD-e]
CFSAN117471	NODE_5_length_270201_cov_37.961107	139331	139927	+	clpP	1-597/597	100	100	vfdb	NP_465991	(clpP) ATP-dependent Clp protease proteolytic subunit [ClpP (VF0074) - Stress survival (VFC0282)] [Listeria monocytogenes EGD-e]
CFSAN117471	NODE_5_length_270201_cov_37.961107	141582	142748	+	inlP	1-1167/1167	100	99.14	vfdb	NP_465993	(inlP) internalin P [InlP (VF0577) - Adherence (VFC0001)] [Listeria monocytogenes EGD-e]
CFSAN117471	NODE_5_length_270201_cov_37.961107	222296	222733	-	gtcA	1-438/438	100	100	vfdb	NP_466072	(gtcA) wall teichoic acid glycosylation protein GtcA [GtcA (VF0607) - Post-translational modification (VFC0315)] [Listeria monocytogenes EGD-e]
CFSAN117471	NODE_5_length_270201_cov_37.961107	232483	235236	+	ami	1-2754/2754	100	99.27	vfdb	NP_466081	(ami) autolysin amidase adhesin [Ami (VF0071) - Adherence (VFC0001)] [Listeria monocytogenes EGD-e]
CFSAN117471	NODE_6_length_259489_cov_31.837991	206643	208511	+	oatA	1-1869/1869	100	99.57	vfdb	NP_464816	(oatA) peptidoglycan O-acetyltransferase [OatA (VF0441) - Immune modulation (VFC0258)] [Listeria monocytogenes EGD-e]
CFSAN117471	NODE_6_length_259489_cov_31.837991	208545	210341	-	inlK	1-1797/1797	100	100	vfdb	NP_464815	(inlK) internalin K [InlK (VF0439) - Immune modulation (VFC0258)] [Listeria monocytogenes EGD-e]
CFSAN117471	NODE_7_length_217173_cov_33.463925	151563	154163	+	lap	1-2601/2601	100	100	vfdb	NP_465159	(lap) Listeria adhesion protein Lap [Lap (VF0444) - Adherence (VFC0001)] [Listeria monocytogenes EGD-e]
CFSAN117471	NODE_7_length_217173_cov_33.463925	191348	196483	-	lapB	1-5136/5136	100	98.87	vfdb	NP_465191	(lapB) Listeria adhesion protein LapB [LapB (VF0446) - Adherence (VFC0001)] [Listeria monocytogenes EGD-e]
CFSAN117471	NODE_8_length_167711_cov_35.556933	162946	165408	-	clpC	1-2463/2463	100	100	vfdb	NP_463763	(clpC) endopeptidase Clp ATP-binding chain C [ClpC (VF0072) - Stress survival (VFC0282)] [Listeria monocytogenes EGD-e]
CFSAN117472	NODE_1_length_937590_cov_25.468404	72009	74474	+	inlF	1-2466/2466	100	98.22	vfdb	NP_463939	(inlF) internalin F [InlF (VF0447) - Adherence (VFC0001)] [Listeria monocytogenes EGD-e]
CFSAN117472	NODE_1_length_937590_cov_25.468404	79862	81262	+	pdgA	1-1401/1401	100	99.71	vfdb	NP_463944	(pdgA) Peptidoglycan N-deacetylase [PgdA (VF0442) - Immune modulation (VFC0258)] [Listeria monocytogenes EGD-e]
CFSAN117472	NODE_1_length_937590_cov_25.468404	96914	99316	+	inlA	1-2403/2403	100	99.21	vfdb	NP_463962	(inlA) Internalin A [InlA (VF0069) - Invasion (VFC0083)] [Listeria monocytogenes EGD-e]
CFSAN117472	NODE_1_length_937590_cov_25.468404	99401	101293	+	inlB	1-1893/1893	100	99.37	vfdb	NP_463963	(inlB) Internalin B [InlB (VF0070) - Invasion (VFC0083)] [Listeria monocytogenes EGD-e]
CFSAN117472	NODE_1_length_937590_cov_25.468404	102965	103582	+	lntA	1-618/618	100	91.1	vfdb	NP_463967	(lntA) listeria nuclear targeted protein A [LntA (VF0440) - Immune modulation (VFC0258)] [Listeria monocytogenes EGD-e]
CFSAN117472	NODE_1_length_937590_cov_25.468404	261307	262743	-	iap/cwhA	1-1449/1449	99.17	98.28	vfdb	NP_464110	(iap/cwhA) P60 extracellular protein invasion associated protein Iap [P60 (VF0068) - Invasion (VFC0083)] [Listeria monocytogenes EGD-e]
CFSAN117472	NODE_1_length_937590_cov_25.468404	510824	512209	+	hpt	1-1386/1386	100	97.69	vfdb	NP_464364	(hpt) hexose phosphate transport protein [Hpt (VF0264) - Nutritional/Metabolic factor (VFC0272)] [Listeria monocytogenes EGD-e]
CFSAN117472	NODE_1_length_937590_cov_25.468404	610280	611275	+	lplA1	1-996/996	100	98.49	vfdb	NP_464456	(lplA1) lipoate protein ligase [LplA1 (VF0347) - Nutritional/Metabolic factor (VFC0272)] [Listeria monocytogenes EGD-e]
CFSAN117472	NODE_1_length_937590_cov_25.468404	668369	670543	-	clpE	1-2175/2175	100	99.63	vfdb	NP_464522	(clpE) ATP-dependent protease [ClpE (VF0073) - Stress survival (VFC0282)] [Listeria monocytogenes EGD-e]
CFSAN117472	NODE_1_length_937590_cov_25.468404	747536	749254	+	aut	1-1719/1719	100	99.65	vfdb	NP_464601	(aut) autolysin [Auto (VF0348) - Invasion (VFC0083)] [Listeria monocytogenes EGD-e]
CFSAN117472	NODE_2_length_507861_cov_26.261986	53860	54741	-	prsA2	1-882/882	100	99.89	vfdb	NP_465743	(prsA2) post translocation chaperone PrsA2 [PrsA2 (VF0449) - Post-translational modification (VFC0315)] [Listeria monocytogenes EGD-e]
CFSAN117472	NODE_2_length_507861_cov_26.261986	86824	87447	+	hbp1/svpA	1-624/624	100	99.84	vfdb	NP_465710	(hbp1/svpA) Haemoglobin binding protein 1 [SvpA (VF0263) - Nutritional/Metabolic factor (VFC0272)] [Listeria monocytogenes EGD-e]
CFSAN117472	NODE_2_length_507861_cov_26.261986	87462	89171	+	hbp2	1-1710/1710	100	99.94	vfdb	NP_465709	(hbp2) hypothetical protein [SvpA (VF0263) - Nutritional/Metabolic factor (VFC0272)] [Listeria monocytogenes EGD-e]
CFSAN117472	NODE_2_length_507861_cov_26.261986	215609	216586	+	bsh	1-978/978	100	99.9	vfdb	NP_465591	(bsh) bile salt hydrolase [BSH (VF0350) - Stress survival (VFC0282)] [Listeria monocytogenes EGD-e]
CFSAN117472	NODE_2_length_507861_cov_26.261986	437032	437964	+	lpeA	1-933/933	100	97.53	vfdb	NP_465372	(lpeA) lipoprotein promoting cell invasion [LpeA (VF0346) - Invasion (VFC0083)] [Listeria monocytogenes EGD-e]
CFSAN117472	NODE_2_length_507861_cov_26.261986	440889	441353	+	lspA	1-465/465	100	99.78	vfdb	NP_465369	(lspA) signal peptidase II [Lsp (VF0351) - Post-translational modification (VFC0315)] [Listeria monocytogenes EGD-e]
CFSAN117472	NODE_2_length_507861_cov_26.261986	455929	457641	-	fbpA	1-1713/1713	100	95.45	vfdb	NP_465354	(fbpA) fibronectin-binding protein [FbpA (VF0349) - Adherence (VFC0001)] [Listeria monocytogenes EGD-e]
CFSAN117472	NODE_2_length_507861_cov_26.261986	500195	501082	+	inlC	4-891/891	99.66	99.89	vfdb	NP_465311	(inlC) internalin C [InlC (VF0438) - Immune modulation (VFC0258)] [Listeria monocytogenes EGD-e]
CFSAN117472	NODE_3_length_473927_cov_23.078356	59180	61780	-	lap	1-2601/2601	100	99.85	vfdb	NP_465159	(lap) Listeria adhesion protein Lap [Lap (VF0444) - Adherence (VFC0001)] [Listeria monocytogenes EGD-e]
CFSAN117472	NODE_3_length_473927_cov_23.078356	419743	421611	+	oatA	1-1869/1869	100	99.89	vfdb	NP_464816	(oatA) peptidoglycan O-acetyltransferase [OatA (VF0441) - Immune modulation (VFC0258)] [Listeria monocytogenes EGD-e]
CFSAN117472	NODE_3_length_473927_cov_23.078356	421645	423441	-	inlK	1-1797/1797	100	98.61	vfdb	NP_464815	(inlK) internalin K [InlK (VF0439) - Immune modulation (VFC0258)] [Listeria monocytogenes EGD-e]
CFSAN117472	NODE_4_length_418637_cov_30.175040	235279	237834	+	inlJ	1-2556/2556	100	97.61	vfdb	NP_466343	(inlJ) internalin J [InlJ (VF0445) - Adherence (VFC0001)] [Listeria monocytogenes EGD-e]
CFSAN117472	NODE_5_length_227541_cov_29.204825	48140	48577	+	gtcA	1-438/438	100	99.77	vfdb	NP_466072	(gtcA) wall teichoic acid glycosylation protein GtcA [GtcA (VF0607) - Post-translational modification (VFC0315)] [Listeria monocytogenes EGD-e]
CFSAN117472	NODE_5_length_227541_cov_29.204825	128124	129290	-	inlP	1-1167/1167	100	92.8	vfdb	NP_465993	(inlP) internalin P [InlP (VF0577) - Adherence (VFC0001)] [Listeria monocytogenes EGD-e]
CFSAN117472	NODE_5_length_227541_cov_29.204825	130947	131543	-	clpP	1-597/597	100	99.83	vfdb	NP_465991	(clpP) ATP-dependent Clp protease proteolytic subunit [ClpP (VF0074) - Stress survival (VFC0282)] [Listeria monocytogenes EGD-e]
CFSAN117472	NODE_7_length_141974_cov_25.902994	2271	4733	+	clpC	1-2463/2463	100	99.92	vfdb	NP_463763	(clpC) endopeptidase Clp ATP-binding chain C [ClpC (VF0072) - Stress survival (VFC0282)] [Listeria monocytogenes EGD-e]
CFSAN117472	NODE_9_length_59009_cov_29.567457	19976	20845	-	plcB	1-870/870	100	99.77	vfdb	NP_463736	(plcB) phospholipase C [PlcB (VF0067) - Exotoxin (VFC0235)] [Listeria monocytogenes EGD-e]
CFSAN117472	NODE_9_length_59009_cov_29.567457	22894	24426	-	mpl	1-1533/1533	100	99.22	vfdb	NP_463734	(mpl) Zinc metalloproteinase precursor [Mpl (VF0065) - Exoenzyme (VFC0251)] [Listeria monocytogenes EGD-e]
CFSAN117472	NODE_9_length_59009_cov_29.567457	24757	26346	-	hly	1-1590/1590	100	99.94	vfdb	NP_463733	(hly) listeriolysin O precursor [LLO (VF0064) - Exotoxin (VFC0235)] [Listeria monocytogenes EGD-e]
CFSAN117472	NODE_9_length_59009_cov_29.567457	26588	27541	+	plcA	1-954/954	100	98.32	vfdb	NP_463732	(plcA) phosphatidylinositol-specific phospholipase c [PlcA (VF0063) - Exotoxin (VFC0235)] [Listeria monocytogenes EGD-e]
CFSAN117472	NODE_9_length_59009_cov_29.567457	27812	28532	+	prfA	1-714/714	100	99.03	vfdb	NP_463731	(prfA) listeriolysin positive regulatory protein [PrfA (VF0062) - Regulation (VFC0301)] [Listeria monocytogenes EGD-e]
CFSAN117473	NODE_12_length_95845_cov_21.908690	61840	64311	+	inlF	1-2466/2466	99.96	80.95	vfdb	NP_463939	(inlF) internalin F [InlF (VF0447) - Adherence (VFC0001)] [Listeria monocytogenes EGD-e]
CFSAN117473	NODE_12_length_95845_cov_21.908690	69697	71097	+	pdgA	1-1401/1401	100	96.93	vfdb	NP_463944	(pdgA) Peptidoglycan N-deacetylase [PgdA (VF0442) - Immune modulation (VFC0258)] [Listeria monocytogenes EGD-e]
CFSAN117473	NODE_13_length_87591_cov_22.910535	25105	25973	-	plcB	2-870/870	99.89	95.63	vfdb	NP_463736	(plcB) phospholipase C [PlcB (VF0067) - Exotoxin (VFC0235)] [Listeria monocytogenes EGD-e]
CFSAN117473	NODE_13_length_87591_cov_22.910535	26012	27929	-	actA	1-1918/1920	99.9	94.21	vfdb	NP_463735	(actA) actin-assembly inducing protein precursor [ActA (VF0066) - Motility (VFC0204)] [Listeria monocytogenes EGD-e]
CFSAN117473	NODE_13_length_87591_cov_22.910535	28129	29661	-	mpl	1-1533/1533	100	94.91	vfdb	NP_463734	(mpl) Zinc metalloproteinase precursor [Mpl (VF0065) - Exoenzyme (VFC0251)] [Listeria monocytogenes EGD-e]
CFSAN117473	NODE_13_length_87591_cov_22.910535	29996	31585	-	hly	1-1590/1590	100	97.36	vfdb	NP_463733	(hly) listeriolysin O precursor [LLO (VF0064) - Exotoxin (VFC0235)] [Listeria monocytogenes EGD-e]
CFSAN117473	NODE_13_length_87591_cov_22.910535	31828	32781	+	plcA	1-954/954	100	97.38	vfdb	NP_463732	(plcA) phosphatidylinositol-specific phospholipase c [PlcA (VF0063) - Exotoxin (VFC0235)] [Listeria monocytogenes EGD-e]
CFSAN117473	NODE_13_length_87591_cov_22.910535	33054	33767	+	prfA	1-714/714	100	97.48	vfdb	NP_463731	(prfA) listeriolysin positive regulatory protein [PrfA (VF0062) - Regulation (VFC0301)] [Listeria monocytogenes EGD-e]
CFSAN117473	NODE_14_length_76298_cov_21.025732	62214	63923	-	hbp2	1-1710/1710	100	93.45	vfdb	NP_465709	(hbp2) hypothetical protein [SvpA (VF0263) - Nutritional/Metabolic factor (VFC0272)] [Listeria monocytogenes EGD-e]
CFSAN117473	NODE_14_length_76298_cov_21.025732	63936	64562	-	hbp1/svpA	1-624/624	100	90.27	vfdb	NP_465710	(hbp1/svpA) Haemoglobin binding protein 1 [SvpA (VF0263) - Nutritional/Metabolic factor (VFC0272)] [Listeria monocytogenes EGD-e]
CFSAN117473	NODE_19_length_61303_cov_21.631342	20297	21178	+	prsA2	1-882/882	100	96.37	vfdb	NP_465743	(prsA2) post translocation chaperone PrsA2 [PrsA2 (VF0449) - Post-translational modification (VFC0315)] [Listeria monocytogenes EGD-e]
CFSAN117473	NODE_1_length_329637_cov_20.198307	116915	119083	+	clpE	1-2175/2175	99.72	93.66	vfdb	NP_464522	(clpE) ATP-dependent protease [ClpE (VF0073) - Stress survival (VFC0282)] [Listeria monocytogenes EGD-e]
CFSAN117473	NODE_1_length_329637_cov_20.198307	177112	178107	-	lplA1	1-996/996	100	92.67	vfdb	NP_464456	(lplA1) lipoate protein ligase [LplA1 (VF0347) - Nutritional/Metabolic factor (VFC0272)] [Listeria monocytogenes EGD-e]
CFSAN117473	NODE_1_length_329637_cov_20.198307	276083	277468	-	hpt	1-1386/1386	100	97.76	vfdb	NP_464364	(hpt) hexose phosphate transport protein [Hpt (VF0264) - Nutritional/Metabolic factor (VFC0272)] [Listeria monocytogenes EGD-e]
CFSAN117473	NODE_22_length_49307_cov_18.341643	19075	20961	+	oatA	1-1869/1869	100	93.48	vfdb	NP_464816	(oatA) peptidoglycan O-acetyltransferase [OatA (VF0441) - Immune modulation (VFC0258)] [Listeria monocytogenes EGD-e]
CFSAN117473	NODE_22_length_49307_cov_18.341643	20994	22814	-	inlK	1-1797/1797	100	89.18	vfdb	NP_464815	(inlK) internalin K [InlK (VF0439) - Immune modulation (VFC0258)] [Listeria monocytogenes EGD-e]
CFSAN117473	NODE_24_length_41964_cov_22.156440	16124	21280	-	lapB	1-5136/5136	100	93.08	vfdb	NP_465191	(lapB) Listeria adhesion protein LapB [LapB (VF0446) - Adherence (VFC0001)] [Listeria monocytogenes EGD-e]
CFSAN117473	NODE_26_length_32338_cov_19.001925	5542	7944	+	inlA	1-2403/2403	100	96.71	vfdb	NP_463962	(inlA) Internalin A [InlA (VF0069) - Invasion (VFC0083)] [Listeria monocytogenes EGD-e]
CFSAN117473	NODE_26_length_32338_cov_19.001925	8029	9919	+	inlB	1-1891/1893	99.89	92.33	vfdb	NP_463963	(inlB) Internalin B [InlB (VF0070) - Invasion (VFC0083)] [Listeria monocytogenes EGD-e]
CFSAN117473	NODE_26_length_32338_cov_19.001925	11621	12238	+	lntA	1-618/618	100	95.95	vfdb	NP_463967	(lntA) listeria nuclear targeted protein A [LntA (VF0440) - Immune modulation (VFC0258)] [Listeria monocytogenes EGD-e]
CFSAN117473	NODE_2_length_261447_cov_22.980591	6431	7321	-	inlC	1-891/891	100	97.19	vfdb	NP_465311	(inlC) internalin C [InlC (VF0438) - Immune modulation (VFC0258)] [Listeria monocytogenes EGD-e]
CFSAN117473	NODE_2_length_261447_cov_22.980591	50123	51835	+	fbpA	1-1713/1713	100	91.71	vfdb	NP_465354	(fbpA) fibronectin-binding protein [FbpA (VF0349) - Adherence (VFC0001)] [Listeria monocytogenes EGD-e]
CFSAN117473	NODE_2_length_261447_cov_22.980591	66406	66870	-	lspA	1-465/465	100	97.42	vfdb	NP_465369	(lspA) signal peptidase II [Lsp (VF0351) - Post-translational modification (VFC0315)] [Listeria monocytogenes EGD-e]
CFSAN117473	NODE_2_length_261447_cov_22.980591	69795	70727	-	lpeA	1-933/933	100	96.68	vfdb	NP_465372	(lpeA) lipoprotein promoting cell invasion [LpeA (VF0346) - Invasion (VFC0083)] [Listeria monocytogenes EGD-e]
CFSAN117473	NODE_3_length_261392_cov_20.368764	23767	26367	-	lap	1-2601/2601	100	96.85	vfdb	NP_465159	(lap) Listeria adhesion protein Lap [Lap (VF0444) - Adherence (VFC0001)] [Listeria monocytogenes EGD-e]
CFSAN117473	NODE_4_length_225254_cov_21.440516	157653	159080	+	iap/cwhA	1-1449/1449	98.34	95.45	vfdb	NP_464110	(iap/cwhA) P60 extracellular protein invasion associated protein Iap [P60 (VF0068) - Invasion (VFC0083)] [Listeria monocytogenes EGD-e]
CFSAN117473	NODE_5_length_206976_cov_23.694763	81915	82511	+	clpP	1-597/597	100	96.82	vfdb	NP_465991	(clpP) ATP-dependent Clp protease proteolytic subunit [ClpP (VF0074) - Stress survival (VFC0282)] [Listeria monocytogenes EGD-e]
CFSAN117473	NODE_5_length_206976_cov_23.694763	84169	85335	+	inlP	1-1167/1167	100	95.29	vfdb	NP_465993	(inlP) internalin P [InlP (VF0577) - Adherence (VFC0001)] [Listeria monocytogenes EGD-e]
CFSAN117473	NODE_5_length_206976_cov_23.694763	164885	165322	-	gtcA	1-438/438	99.54	80.45	vfdb	NP_466072	(gtcA) wall teichoic acid glycosylation protein GtcA [GtcA (VF0607) - Post-translational modification (VFC0315)] [Listeria monocytogenes EGD-e]
CFSAN117473	NODE_7_length_128973_cov_22.470282	2432	4894	+	clpC	1-2463/2463	100	94.15	vfdb	NP_463763	(clpC) endopeptidase Clp ATP-binding chain C [ClpC (VF0072) - Stress survival (VFC0282)] [Listeria monocytogenes EGD-e]
CFSAN117473	NODE_7_length_128973_cov_22.470282	115058	116314	-	vip	1-1200/1200	100	85.36	vfdb	NP_463850	(vip) surface adhesin Vip [Vip (VF0443) - Invasion (VFC0083)] [Listeria monocytogenes EGD-e]
CFSAN117473	NODE_9_length_110154_cov_22.337744	39918	40895	-	bsh	1-978/978	100	97.75	vfdb	NP_465591	(bsh) bile salt hydrolase [BSH (VF0350) - Stress survival (VFC0282)] [Listeria monocytogenes EGD-e]
CFSAN117481	NODE_11_length_64254_cov_48.078329	25112	25981	-	plcB	1-870/870	100	100	vfdb	NP_463736	(plcB) phospholipase C [PlcB (VF0067) - Exotoxin (VFC0235)] [Listeria monocytogenes EGD-e]
CFSAN117481	NODE_11_length_64254_cov_48.078329	26017	27936	-	actA	1-1920/1920	100	100	vfdb	NP_463735	(actA) actin-assembly inducing protein precursor [ActA (VF0066) - Motility (VFC0204)] [Listeria monocytogenes EGD-e]
CFSAN117481	NODE_11_length_64254_cov_48.078329	28135	29667	-	mpl	1-1533/1533	100	99.94	vfdb	NP_463734	(mpl) Zinc metalloproteinase precursor [Mpl (VF0065) - Exoenzyme (VFC0251)] [Listeria monocytogenes EGD-e]
CFSAN117481	NODE_11_length_64254_cov_48.078329	29998	31587	-	hly	1-1590/1590	100	100	vfdb	NP_463733	(hly) listeriolysin O precursor [LLO (VF0064) - Exotoxin (VFC0235)] [Listeria monocytogenes EGD-e]
CFSAN117481	NODE_11_length_64254_cov_48.078329	31829	32782	+	plcA	1-954/954	100	100	vfdb	NP_463732	(plcA) phosphatidylinositol-specific phospholipase c [PlcA (VF0063) - Exotoxin (VFC0235)] [Listeria monocytogenes EGD-e]
CFSAN117481	NODE_11_length_64254_cov_48.078329	33053	33766	+	prfA	1-714/714	100	100	vfdb	NP_463731	(prfA) listeriolysin positive regulatory protein [PrfA (VF0062) - Regulation (VFC0301)] [Listeria monocytogenes EGD-e]
CFSAN117481	NODE_1_length_508519_cov_45.043673	6793	7683	-	inlC	1-891/891	100	100	vfdb	NP_465311	(inlC) internalin C [InlC (VF0438) - Immune modulation (VFC0258)] [Listeria monocytogenes EGD-e]
CFSAN117481	NODE_1_length_508519_cov_45.043673	50703	52415	+	fbpA	1-1713/1713	100	99.88	vfdb	NP_465354	(fbpA) fibronectin-binding protein [FbpA (VF0349) - Adherence (VFC0001)] [Listeria monocytogenes EGD-e]
CFSAN117481	NODE_1_length_508519_cov_45.043673	66987	67451	-	lspA	1-465/465	100	100	vfdb	NP_465369	(lspA) signal peptidase II [Lsp (VF0351) - Post-translational modification (VFC0315)] [Listeria monocytogenes EGD-e]
CFSAN117481	NODE_1_length_508519_cov_45.043673	70376	71308	-	lpeA	1-933/933	100	100	vfdb	NP_465372	(lpeA) lipoprotein promoting cell invasion [LpeA (VF0346) - Invasion (VFC0083)] [Listeria monocytogenes EGD-e]
CFSAN117481	NODE_1_length_508519_cov_45.043673	293001	293978	-	bsh	1-978/978	100	100	vfdb	NP_465591	(bsh) bile salt hydrolase [BSH (VF0350) - Stress survival (VFC0282)] [Listeria monocytogenes EGD-e]
CFSAN117481	NODE_1_length_508519_cov_45.043673	418953	420662	-	hbp2	1-1710/1710	100	100	vfdb	NP_465709	(hbp2) hypothetical protein [SvpA (VF0263) - Nutritional/Metabolic factor (VFC0272)] [Listeria monocytogenes EGD-e]
CFSAN117481	NODE_1_length_508519_cov_45.043673	420677	421300	-	hbp1/svpA	1-624/624	100	100	vfdb	NP_465710	(hbp1/svpA) Haemoglobin binding protein 1 [SvpA (VF0263) - Nutritional/Metabolic factor (VFC0272)] [Listeria monocytogenes EGD-e]
CFSAN117481	NODE_1_length_508519_cov_45.043673	453383	454264	+	prsA2	1-882/882	100	100	vfdb	NP_465743	(prsA2) post translocation chaperone PrsA2 [PrsA2 (VF0449) - Post-translational modification (VFC0315)] [Listeria monocytogenes EGD-e]
CFSAN117481	NODE_2_length_435770_cov_42.725686	232012	233454	+	iap/cwhA	1-1449/1449	99.59	99.59	vfdb	NP_464110	(iap/cwhA) P60 extracellular protein invasion associated protein Iap [P60 (VF0068) - Invasion (VFC0083)] [Listeria monocytogenes EGD-e]
CFSAN117481	NODE_2_length_435770_cov_42.725686	384175	384792	-	lntA	1-618/618	100	99.68	vfdb	NP_463967	(lntA) listeria nuclear targeted protein A [LntA (VF0440) - Immune modulation (VFC0258)] [Listeria monocytogenes EGD-e]
CFSAN117481	NODE_2_length_435770_cov_42.725686	393397	395289	-	inlB	1-1893/1893	100	100	vfdb	NP_463963	(inlB) Internalin B [InlB (VF0070) - Invasion (VFC0083)] [Listeria monocytogenes EGD-e]
CFSAN117481	NODE_2_length_435770_cov_42.725686	395374	397776	-	inlA	1-2403/2403	100	100	vfdb	NP_463962	(inlA) Internalin A [InlA (VF0069) - Invasion (VFC0083)] [Listeria monocytogenes EGD-e]
CFSAN117481	NODE_2_length_435770_cov_42.725686	413428	414828	-	pdgA	1-1401/1401	100	100	vfdb	NP_463944	(pdgA) Peptidoglycan N-deacetylase [PgdA (VF0442) - Immune modulation (VFC0258)] [Listeria monocytogenes EGD-e]
CFSAN117481	NODE_2_length_435770_cov_42.725686	420216	422681	-	inlF	1-2466/2466	100	100	vfdb	NP_463939	(inlF) internalin F [InlF (VF0447) - Adherence (VFC0001)] [Listeria monocytogenes EGD-e]
CFSAN117481	NODE_3_length_431857_cov_45.367855	180627	182344	-	aut	1-1719/1719	99.94	99.83	vfdb	NP_464601	(aut) autolysin [Auto (VF0348) - Invasion (VFC0083)] [Listeria monocytogenes EGD-e]
CFSAN117481	NODE_3_length_431857_cov_45.367855	259340	261514	+	clpE	1-2175/2175	100	100	vfdb	NP_464522	(clpE) ATP-dependent protease [ClpE (VF0073) - Stress survival (VFC0282)] [Listeria monocytogenes EGD-e]
CFSAN117481	NODE_3_length_431857_cov_45.367855	318608	319603	-	lplA1	1-996/996	100	100	vfdb	NP_464456	(lplA1) lipoate protein ligase [LplA1 (VF0347) - Nutritional/Metabolic factor (VFC0272)] [Listeria monocytogenes EGD-e]
CFSAN117481	NODE_3_length_431857_cov_45.367855	416876	418261	-	hpt	1-1386/1386	100	97.83	vfdb	NP_464364	(hpt) hexose phosphate transport protein [Hpt (VF0264) - Nutritional/Metabolic factor (VFC0272)] [Listeria monocytogenes EGD-e]
CFSAN117481	NODE_4_length_424701_cov_46.615445	193617	196172	-	inlJ	1-2556/2556	100	100	vfdb	NP_466343	(inlJ) internalin J [InlJ (VF0445) - Adherence (VFC0001)] [Listeria monocytogenes EGD-e]
CFSAN117481	NODE_5_length_259508_cov_38.727054	206643	208511	+	oatA	1-1869/1869	100	99.57	vfdb	NP_464816	(oatA) peptidoglycan O-acetyltransferase [OatA (VF0441) - Immune modulation (VFC0258)] [Listeria monocytogenes EGD-e]
CFSAN117481	NODE_5_length_259508_cov_38.727054	208545	210341	-	inlK	1-1797/1797	100	100	vfdb	NP_464815	(inlK) internalin K [InlK (VF0439) - Immune modulation (VFC0258)] [Listeria monocytogenes EGD-e]
CFSAN117481	NODE_6_length_229933_cov_47.660000	35182	37935	-	ami	1-2754/2754	100	99.27	vfdb	NP_466081	(ami) autolysin amidase adhesin [Ami (VF0071) - Adherence (VFC0001)] [Listeria monocytogenes EGD-e]
CFSAN117481	NODE_6_length_229933_cov_47.660000	47685	48122	+	gtcA	1-438/438	100	100	vfdb	NP_466072	(gtcA) wall teichoic acid glycosylation protein GtcA [GtcA (VF0607) - Post-translational modification (VFC0315)] [Listeria monocytogenes EGD-e]
CFSAN117481	NODE_6_length_229933_cov_47.660000	127670	128836	-	inlP	1-1167/1167	100	99.14	vfdb	NP_465993	(inlP) internalin P [InlP (VF0577) - Adherence (VFC0001)] [Listeria monocytogenes EGD-e]
CFSAN117481	NODE_6_length_229933_cov_47.660000	130491	131087	-	clpP	1-597/597	100	100	vfdb	NP_465991	(clpP) ATP-dependent Clp protease proteolytic subunit [ClpP (VF0074) - Stress survival (VFC0282)] [Listeria monocytogenes EGD-e]
CFSAN117481	NODE_7_length_217173_cov_40.849009	151563	154163	+	lap	1-2601/2601	100	100	vfdb	NP_465159	(lap) Listeria adhesion protein Lap [Lap (VF0444) - Adherence (VFC0001)] [Listeria monocytogenes EGD-e]
CFSAN117481	NODE_7_length_217173_cov_40.849009	191348	196483	-	lapB	1-5136/5136	100	98.87	vfdb	NP_465191	(lapB) Listeria adhesion protein LapB [LapB (VF0446) - Adherence (VFC0001)] [Listeria monocytogenes EGD-e]
CFSAN117481	NODE_9_length_119359_cov_46.011322	114627	117089	-	clpC	1-2463/2463	100	100	vfdb	NP_463763	(clpC) endopeptidase Clp ATP-binding chain C [ClpC (VF0072) - Stress survival (VFC0282)] [Listeria monocytogenes EGD-e]
CFSAN117486	NODE_10_length_90312_cov_22.408527	25105	25973	-	plcB	2-870/870	99.89	95.63	vfdb	NP_463736	(plcB) phospholipase C [PlcB (VF0067) - Exotoxin (VFC0235)] [Listeria monocytogenes EGD-e]
CFSAN117486	NODE_10_length_90312_cov_22.408527	26012	27929	-	actA	1-1918/1920	99.9	94.21	vfdb	NP_463735	(actA) actin-assembly inducing protein precursor [ActA (VF0066) - Motility (VFC0204)] [Listeria monocytogenes EGD-e]
CFSAN117486	NODE_10_length_90312_cov_22.408527	28129	29661	-	mpl	1-1533/1533	100	94.91	vfdb	NP_463734	(mpl) Zinc metalloproteinase precursor [Mpl (VF0065) - Exoenzyme (VFC0251)] [Listeria monocytogenes EGD-e]
CFSAN117486	NODE_10_length_90312_cov_22.408527	29996	31585	-	hly	1-1590/1590	100	97.36	vfdb	NP_463733	(hly) listeriolysin O precursor [LLO (VF0064) - Exotoxin (VFC0235)] [Listeria monocytogenes EGD-e]
CFSAN117486	NODE_10_length_90312_cov_22.408527	31828	32781	+	plcA	1-954/954	100	97.28	vfdb	NP_463732	(plcA) phosphatidylinositol-specific phospholipase c [PlcA (VF0063) - Exotoxin (VFC0235)] [Listeria monocytogenes EGD-e]
CFSAN117486	NODE_10_length_90312_cov_22.408527	33054	33767	+	prfA	1-714/714	100	97.48	vfdb	NP_463731	(prfA) listeriolysin positive regulatory protein [PrfA (VF0062) - Regulation (VFC0301)] [Listeria monocytogenes EGD-e]
CFSAN117486	NODE_11_length_77191_cov_21.099722	20059	20940	+	prsA2	1-882/882	100	96.37	vfdb	NP_465743	(prsA2) post translocation chaperone PrsA2 [PrsA2 (VF0449) - Post-translational modification (VFC0315)] [Listeria monocytogenes EGD-e]
CFSAN117486	NODE_15_length_71481_cov_19.312849	49216	51384	+	clpE	1-2175/2175	99.72	93.66	vfdb	NP_464522	(clpE) ATP-dependent protease [ClpE (VF0073) - Stress survival (VFC0282)] [Listeria monocytogenes EGD-e]
CFSAN117486	NODE_1_length_254899_cov_22.112053	6431	7321	-	inlC	1-891/891	100	97.19	vfdb	NP_465311	(inlC) internalin C [InlC (VF0438) - Immune modulation (VFC0258)] [Listeria monocytogenes EGD-e]
CFSAN117486	NODE_1_length_254899_cov_22.112053	49523	51235	+	fbpA	1-1713/1713	100	91.71	vfdb	NP_465354	(fbpA) fibronectin-binding protein [FbpA (VF0349) - Adherence (VFC0001)] [Listeria monocytogenes EGD-e]
CFSAN117486	NODE_1_length_254899_cov_22.112053	65806	66270	-	lspA	1-465/465	100	97.42	vfdb	NP_465369	(lspA) signal peptidase II [Lsp (VF0351) - Post-translational modification (VFC0315)] [Listeria monocytogenes EGD-e]
CFSAN117486	NODE_1_length_254899_cov_22.112053	69195	70127	-	lpeA	1-933/933	100	96.68	vfdb	NP_465372	(lpeA) lipoprotein promoting cell invasion [LpeA (VF0346) - Invasion (VFC0083)] [Listeria monocytogenes EGD-e]
CFSAN117486	NODE_21_length_42963_cov_18.103885	105	1991	+	oatA	1-1869/1869	100	93.48	vfdb	NP_464816	(oatA) peptidoglycan O-acetyltransferase [OatA (VF0441) - Immune modulation (VFC0258)] [Listeria monocytogenes EGD-e]
CFSAN117486	NODE_21_length_42963_cov_18.103885	2024	3844	-	inlK	1-1797/1797	100	89.18	vfdb	NP_464815	(inlK) internalin K [InlK (VF0439) - Immune modulation (VFC0258)] [Listeria monocytogenes EGD-e]
CFSAN117486	NODE_22_length_42801_cov_20.647537	11828	12454	+	hbp1/svpA	1-624/624	100	90.27	vfdb	NP_465710	(hbp1/svpA) Haemoglobin binding protein 1 [SvpA (VF0263) - Nutritional/Metabolic factor (VFC0272)] [Listeria monocytogenes EGD-e]
CFSAN117486	NODE_22_length_42801_cov_20.647537	12467	14176	+	hbp2	1-1710/1710	100	93.45	vfdb	NP_465709	(hbp2) hypothetical protein [SvpA (VF0263) - Nutritional/Metabolic factor (VFC0272)] [Listeria monocytogenes EGD-e]
CFSAN117486	NODE_24_length_40345_cov_22.126535	14505	19661	-	lapB	1-5136/5136	100	93.08	vfdb	NP_465191	(lapB) Listeria adhesion protein LapB [LapB (VF0446) - Adherence (VFC0001)] [Listeria monocytogenes EGD-e]
CFSAN117486	NODE_25_length_39707_cov_27.205154	2271	4733	+	clpC	1-2463/2463	100	94.15	vfdb	NP_463763	(clpC) endopeptidase Clp ATP-binding chain C [ClpC (VF0072) - Stress survival (VFC0282)] [Listeria monocytogenes EGD-e]
CFSAN117486	NODE_27_length_34464_cov_20.339080	2317	4719	+	inlA	1-2403/2403	100	96.75	vfdb	NP_463962	(inlA) Internalin A [InlA (VF0069) - Invasion (VFC0083)] [Listeria monocytogenes EGD-e]
CFSAN117486	NODE_27_length_34464_cov_20.339080	4804	6694	+	inlB	1-1891/1893	99.89	92.33	vfdb	NP_463963	(inlB) Internalin B [InlB (VF0070) - Invasion (VFC0083)] [Listeria monocytogenes EGD-e]
CFSAN117486	NODE_27_length_34464_cov_20.339080	8396	9013	+	lntA	1-618/618	100	95.95	vfdb	NP_463967	(lntA) listeria nuclear targeted protein A [LntA (VF0440) - Immune modulation (VFC0258)] [Listeria monocytogenes EGD-e]
CFSAN117486	NODE_2_length_248683_cov_19.325524	25355	27955	-	lap	1-2601/2601	100	96.85	vfdb	NP_465159	(lap) Listeria adhesion protein Lap [Lap (VF0444) - Adherence (VFC0001)] [Listeria monocytogenes EGD-e]
CFSAN117486	NODE_3_length_225253_cov_20.615691	157652	159079	+	iap/cwhA	1-1449/1449	98.34	95.45	vfdb	NP_464110	(iap/cwhA) P60 extracellular protein invasion associated protein Iap [P60 (VF0068) - Invasion (VFC0083)] [Listeria monocytogenes EGD-e]
CFSAN117486	NODE_4_length_204983_cov_20.314240	66700	68085	+	hpt	1-1386/1386	100	97.76	vfdb	NP_464364	(hpt) hexose phosphate transport protein [Hpt (VF0264) - Nutritional/Metabolic factor (VFC0272)] [Listeria monocytogenes EGD-e]
CFSAN117486	NODE_4_length_204983_cov_20.314240	166062	167057	+	lplA1	1-996/996	100	92.57	vfdb	NP_464456	(lplA1) lipoate protein ligase [LplA1 (VF0347) - Nutritional/Metabolic factor (VFC0272)] [Listeria monocytogenes EGD-e]
CFSAN117486	NODE_6_length_194369_cov_20.702968	21227	22627	-	pdgA	1-1401/1401	100	97	vfdb	NP_463944	(pdgA) Peptidoglycan N-deacetylase [PgdA (VF0442) - Immune modulation (VFC0258)] [Listeria monocytogenes EGD-e]
CFSAN117486	NODE_6_length_194369_cov_20.702968	28013	30484	-	inlF	1-2466/2466	99.96	80.95	vfdb	NP_463939	(inlF) internalin F [InlF (VF0447) - Adherence (VFC0001)] [Listeria monocytogenes EGD-e]
CFSAN117486	NODE_6_length_194369_cov_20.702968	120445	121701	+	vip	1-1200/1200	100	85.36	vfdb	NP_463850	(vip) surface adhesin Vip [Vip (VF0443) - Invasion (VFC0083)] [Listeria monocytogenes EGD-e]
CFSAN117486	NODE_7_length_149609_cov_21.123747	45784	46761	-	bsh	1-978/978	100	97.75	vfdb	NP_465591	(bsh) bile salt hydrolase [BSH (VF0350) - Stress survival (VFC0282)] [Listeria monocytogenes EGD-e]
CFSAN117486	NODE_8_length_146578_cov_23.318339	1	368	+	gtcA	71-438/438	83.56	80.81	vfdb	NP_466072	(gtcA) wall teichoic acid glycosylation protein GtcA [GtcA (VF0607) - Post-translational modification (VFC0315)] [Listeria monocytogenes EGD-e]
CFSAN117486	NODE_8_length_146578_cov_23.318339	79917	81083	-	inlP	1-1167/1167	100	95.29	vfdb	NP_465993	(inlP) internalin P [InlP (VF0577) - Adherence (VFC0001)] [Listeria monocytogenes EGD-e]
CFSAN117486	NODE_8_length_146578_cov_23.318339	82741	83337	-	clpP	1-597/597	100	96.82	vfdb	NP_465991	(clpP) ATP-dependent Clp protease proteolytic subunit [ClpP (VF0074) - Stress survival (VFC0282)] [Listeria monocytogenes EGD-e]
CFSAN117490	NODE_11_length_85907_cov_30.346596	79443	80828	+	hpt	1-1386/1386	100	97.62	vfdb	NP_464364	(hpt) hexose phosphate transport protein [Hpt (VF0264) - Nutritional/Metabolic factor (VFC0272)] [Listeria monocytogenes EGD-e]
CFSAN117490	NODE_12_length_78610_cov_30.771377	26503	29103	-	lap	1-2601/2601	100	99.92	vfdb	NP_465159	(lap) Listeria adhesion protein Lap [Lap (VF0444) - Adherence (VFC0001)] [Listeria monocytogenes EGD-e]
CFSAN117490	NODE_14_length_64252_cov_39.067368	25119	25988	-	plcB	1-870/870	100	99.77	vfdb	NP_463736	(plcB) phospholipase C [PlcB (VF0067) - Exotoxin (VFC0235)] [Listeria monocytogenes EGD-e]
CFSAN117490	NODE_14_length_64252_cov_39.067368	26025	27944	-	actA	1-1920/1920	100	97.5	vfdb	NP_463735	(actA) actin-assembly inducing protein precursor [ActA (VF0066) - Motility (VFC0204)] [Listeria monocytogenes EGD-e]
CFSAN117490	NODE_14_length_64252_cov_39.067368	28143	29675	-	mpl	1-1533/1533	100	99.61	vfdb	NP_463734	(mpl) Zinc metalloproteinase precursor [Mpl (VF0065) - Exoenzyme (VFC0251)] [Listeria monocytogenes EGD-e]
CFSAN117490	NODE_14_length_64252_cov_39.067368	30006	31595	-	hly	1-1590/1590	100	99.94	vfdb	NP_463733	(hly) listeriolysin O precursor [LLO (VF0064) - Exotoxin (VFC0235)] [Listeria monocytogenes EGD-e]
CFSAN117490	NODE_14_length_64252_cov_39.067368	31837	32790	+	plcA	1-954/954	100	99.27	vfdb	NP_463732	(plcA) phosphatidylinositol-specific phospholipase c [PlcA (VF0063) - Exotoxin (VFC0235)] [Listeria monocytogenes EGD-e]
CFSAN117490	NODE_14_length_64252_cov_39.067368	33061	33774	+	prfA	1-714/714	100	100	vfdb	NP_463731	(prfA) listeriolysin positive regulatory protein [PrfA (VF0062) - Regulation (VFC0301)] [Listeria monocytogenes EGD-e]
CFSAN117490	NODE_15_length_53476_cov_25.740520	24291	26009	-	aut	1-1719/1719	100	99.83	vfdb	NP_464601	(aut) autolysin [Auto (VF0348) - Invasion (VFC0083)] [Listeria monocytogenes EGD-e]
CFSAN117490	NODE_18_length_34633_cov_36.768997	8807	13942	-	lapB	1-5136/5136	100	99.03	vfdb	NP_465191	(lapB) Listeria adhesion protein LapB [LapB (VF0446) - Adherence (VFC0001)] [Listeria monocytogenes EGD-e]
CFSAN117490	NODE_19_length_33770_cov_29.595280	12587	13468	-	prsA2	1-882/882	100	99.89	vfdb	NP_465743	(prsA2) post translocation chaperone PrsA2 [PrsA2 (VF0449) - Post-translational modification (VFC0315)] [Listeria monocytogenes EGD-e]
CFSAN117490	NODE_2_length_432290_cov_34.203835	11859	12482	+	hbp1/svpA	1-624/624	100	100	vfdb	NP_465710	(hbp1/svpA) Haemoglobin binding protein 1 [SvpA (VF0263) - Nutritional/Metabolic factor (VFC0272)] [Listeria monocytogenes EGD-e]
CFSAN117490	NODE_2_length_432290_cov_34.203835	12497	14206	+	hbp2	1-1710/1710	100	99.94	vfdb	NP_465709	(hbp2) hypothetical protein [SvpA (VF0263) - Nutritional/Metabolic factor (VFC0272)] [Listeria monocytogenes EGD-e]
CFSAN117490	NODE_2_length_432290_cov_34.203835	140628	141605	+	bsh	1-978/978	100	99.8	vfdb	NP_465591	(bsh) bile salt hydrolase [BSH (VF0350) - Stress survival (VFC0282)] [Listeria monocytogenes EGD-e]
CFSAN117490	NODE_2_length_432290_cov_34.203835	361692	362624	+	lpeA	1-933/933	100	99.57	vfdb	NP_465372	(lpeA) lipoprotein promoting cell invasion [LpeA (VF0346) - Invasion (VFC0083)] [Listeria monocytogenes EGD-e]
CFSAN117490	NODE_2_length_432290_cov_34.203835	365549	366013	+	lspA	1-465/465	100	99.36	vfdb	NP_465369	(lspA) signal peptidase II [Lsp (VF0351) - Post-translational modification (VFC0315)] [Listeria monocytogenes EGD-e]
CFSAN117490	NODE_2_length_432290_cov_34.203835	380589	382301	-	fbpA	1-1713/1713	100	99.88	vfdb	NP_465354	(fbpA) fibronectin-binding protein [FbpA (VF0349) - Adherence (VFC0001)] [Listeria monocytogenes EGD-e]
CFSAN117490	NODE_2_length_432290_cov_34.203835	425002	425892	+	inlC	1-891/891	100	99.21	vfdb	NP_465311	(inlC) internalin C [InlC (VF0438) - Immune modulation (VFC0258)] [Listeria monocytogenes EGD-e]
CFSAN117490	NODE_3_length_278294_cov_31.671298	151877	153679	+	inlK	1-1797/1797	100	98.11	vfdb	NP_464815	(inlK) internalin K [InlK (VF0439) - Immune modulation (VFC0258)] [Listeria monocytogenes EGD-e]
CFSAN117490	NODE_3_length_278294_cov_31.671298	153713	155581	-	oatA	1-1869/1869	100	99.62	vfdb	NP_464816	(oatA) peptidoglycan O-acetyltransferase [OatA (VF0441) - Immune modulation (VFC0258)] [Listeria monocytogenes EGD-e]
CFSAN117490	NODE_4_length_239884_cov_33.124438	67530	68966	-	iap/cwhA	1-1449/1449	99.17	98.97	vfdb	NP_464110	(iap/cwhA) P60 extracellular protein invasion associated protein Iap [P60 (VF0068) - Invasion (VFC0083)] [Listeria monocytogenes EGD-e]
CFSAN117490	NODE_5_length_201863_cov_31.320969	92080	93075	+	lplA1	1-996/996	100	98.29	vfdb	NP_464456	(lplA1) lipoate protein ligase [LplA1 (VF0347) - Nutritional/Metabolic factor (VFC0272)] [Listeria monocytogenes EGD-e]
CFSAN117490	NODE_5_length_201863_cov_31.320969	150171	152345	-	clpE	1-2175/2175	100	99.22	vfdb	NP_464522	(clpE) ATP-dependent protease [ClpE (VF0073) - Stress survival (VFC0282)] [Listeria monocytogenes EGD-e]
CFSAN117490	NODE_6_length_192097_cov_38.629984	35222	37975	-	ami	1-2754/2754	100	99.56	vfdb	NP_466081	(ami) autolysin amidase adhesin [Ami (VF0071) - Adherence (VFC0001)] [Listeria monocytogenes EGD-e]
CFSAN117490	NODE_6_length_192097_cov_38.629984	47725	48162	+	gtcA	1-438/438	100	100	vfdb	NP_466072	(gtcA) wall teichoic acid glycosylation protein GtcA [GtcA (VF0607) - Post-translational modification (VFC0315)] [Listeria monocytogenes EGD-e]
CFSAN117490	NODE_6_length_192097_cov_38.629984	127709	128875	-	inlP	1-1167/1167	100	92.89	vfdb	NP_465993	(inlP) internalin P [InlP (VF0577) - Adherence (VFC0001)] [Listeria monocytogenes EGD-e]
CFSAN117490	NODE_6_length_192097_cov_38.629984	130528	131124	-	clpP	1-597/597	100	100	vfdb	NP_465991	(clpP) ATP-dependent Clp protease proteolytic subunit [ClpP (VF0074) - Stress survival (VFC0282)] [Listeria monocytogenes EGD-e]
CFSAN117490	NODE_8_length_125811_cov_33.411771	28469	29086	-	lntA	1-618/618	100	94.66	vfdb	NP_463967	(lntA) listeria nuclear targeted protein A [LntA (VF0440) - Immune modulation (VFC0258)] [Listeria monocytogenes EGD-e]
CFSAN117490	NODE_8_length_125811_cov_33.411771	37689	39581	-	inlB	1-1893/1893	100	99.21	vfdb	NP_463963	(inlB) Internalin B [InlB (VF0070) - Invasion (VFC0083)] [Listeria monocytogenes EGD-e]
CFSAN117490	NODE_8_length_125811_cov_33.411771	39666	42068	-	inlA	1-2403/2403	100	97.79	vfdb	NP_463962	(inlA) Internalin A [InlA (VF0069) - Invasion (VFC0083)] [Listeria monocytogenes EGD-e]
CFSAN117490	NODE_8_length_125811_cov_33.411771	57720	59120	-	pdgA	1-1401/1401	100	99.93	vfdb	NP_463944	(pdgA) Peptidoglycan N-deacetylase [PgdA (VF0442) - Immune modulation (VFC0258)] [Listeria monocytogenes EGD-e]
CFSAN117490	NODE_9_length_115124_cov_36.708618	2304	4766	+	clpC	1-2463/2463	100	99.88	vfdb	NP_463763	(clpC) endopeptidase Clp ATP-binding chain C [ClpC (VF0072) - Stress survival (VFC0282)] [Listeria monocytogenes EGD-e]
CFSAN117490	NODE_9_length_115124_cov_36.708618	97830	99029	-	vip	1-1200/1200	100	99.42	vfdb	NP_463850	(vip) surface adhesin Vip [Vip (VF0443) - Invasion (VFC0083)] [Listeria monocytogenes EGD-e]
CFSAN117492	NODE_10_length_112953_cov_26.242196	20693	25828	+	lapB	1-5136/5136	100	99.03	vfdb	NP_465191	(lapB) Listeria adhesion protein LapB [LapB (VF0446) - Adherence (VFC0001)] [Listeria monocytogenes EGD-e]
CFSAN117492	NODE_10_length_112953_cov_26.242196	61327	63927	-	lap	1-2601/2601	100	99.92	vfdb	NP_465159	(lap) Listeria adhesion protein Lap [Lap (VF0444) - Adherence (VFC0001)] [Listeria monocytogenes EGD-e]
CFSAN117492	NODE_11_length_110975_cov_29.593254	11936	13135	+	vip	1-1200/1200	100	99.42	vfdb	NP_463850	(vip) surface adhesin Vip [Vip (VF0443) - Invasion (VFC0083)] [Listeria monocytogenes EGD-e]
CFSAN117492	NODE_11_length_110975_cov_29.593254	106210	108672	-	clpC	1-2463/2463	100	99.88	vfdb	NP_463763	(clpC) endopeptidase Clp ATP-binding chain C [ClpC (VF0072) - Stress survival (VFC0282)] [Listeria monocytogenes EGD-e]
CFSAN117492	NODE_13_length_76686_cov_30.645790	28780	29217	-	gtcA	1-438/438	100	100	vfdb	NP_466072	(gtcA) wall teichoic acid glycosylation protein GtcA [GtcA (VF0607) - Post-translational modification (VFC0315)] [Listeria monocytogenes EGD-e]
CFSAN117492	NODE_13_length_76686_cov_30.645790	38967	41720	+	ami	1-2754/2754	100	99.56	vfdb	NP_466081	(ami) autolysin amidase adhesin [Ami (VF0071) - Adherence (VFC0001)] [Listeria monocytogenes EGD-e]
CFSAN117492	NODE_14_length_64252_cov_30.907961	25119	25988	-	plcB	1-870/870	100	99.77	vfdb	NP_463736	(plcB) phospholipase C [PlcB (VF0067) - Exotoxin (VFC0235)] [Listeria monocytogenes EGD-e]
CFSAN117492	NODE_14_length_64252_cov_30.907961	26025	27944	-	actA	1-1920/1920	100	97.5	vfdb	NP_463735	(actA) actin-assembly inducing protein precursor [ActA (VF0066) - Motility (VFC0204)] [Listeria monocytogenes EGD-e]
CFSAN117492	NODE_14_length_64252_cov_30.907961	28143	29675	-	mpl	1-1533/1533	100	99.61	vfdb	NP_463734	(mpl) Zinc metalloproteinase precursor [Mpl (VF0065) - Exoenzyme (VFC0251)] [Listeria monocytogenes EGD-e]
CFSAN117492	NODE_14_length_64252_cov_30.907961	30006	31595	-	hly	1-1590/1590	100	99.94	vfdb	NP_463733	(hly) listeriolysin O precursor [LLO (VF0064) - Exotoxin (VFC0235)] [Listeria monocytogenes EGD-e]
CFSAN117492	NODE_14_length_64252_cov_30.907961	31837	32790	+	plcA	1-954/954	100	99.27	vfdb	NP_463732	(plcA) phosphatidylinositol-specific phospholipase c [PlcA (VF0063) - Exotoxin (VFC0235)] [Listeria monocytogenes EGD-e]
CFSAN117492	NODE_14_length_64252_cov_30.907961	33061	33774	+	prfA	1-714/714	100	100	vfdb	NP_463731	(prfA) listeriolysin positive regulatory protein [PrfA (VF0062) - Regulation (VFC0301)] [Listeria monocytogenes EGD-e]
CFSAN117492	NODE_2_length_393399_cov_25.144111	80420	82222	+	inlK	1-1797/1797	100	98.11	vfdb	NP_464815	(inlK) internalin K [InlK (VF0439) - Immune modulation (VFC0258)] [Listeria monocytogenes EGD-e]
CFSAN117492	NODE_2_length_393399_cov_25.144111	82256	84124	-	oatA	1-1869/1869	100	99.62	vfdb	NP_464816	(oatA) peptidoglycan O-acetyltransferase [OatA (VF0441) - Immune modulation (VFC0258)] [Listeria monocytogenes EGD-e]
CFSAN117492	NODE_3_length_358578_cov_27.923680	6399	7289	-	inlC	1-891/891	100	99.21	vfdb	NP_465311	(inlC) internalin C [InlC (VF0438) - Immune modulation (VFC0258)] [Listeria monocytogenes EGD-e]
CFSAN117492	NODE_3_length_358578_cov_27.923680	50014	51726	+	fbpA	1-1713/1713	100	99.88	vfdb	NP_465354	(fbpA) fibronectin-binding protein [FbpA (VF0349) - Adherence (VFC0001)] [Listeria monocytogenes EGD-e]
CFSAN117492	NODE_3_length_358578_cov_27.923680	66302	66766	-	lspA	1-465/465	100	99.36	vfdb	NP_465369	(lspA) signal peptidase II [Lsp (VF0351) - Post-translational modification (VFC0315)] [Listeria monocytogenes EGD-e]
CFSAN117492	NODE_3_length_358578_cov_27.923680	69691	70623	-	lpeA	1-933/933	100	99.57	vfdb	NP_465372	(lpeA) lipoprotein promoting cell invasion [LpeA (VF0346) - Invasion (VFC0083)] [Listeria monocytogenes EGD-e]
CFSAN117492	NODE_3_length_358578_cov_27.923680	290710	291687	-	bsh	1-978/978	100	99.8	vfdb	NP_465591	(bsh) bile salt hydrolase [BSH (VF0350) - Stress survival (VFC0282)] [Listeria monocytogenes EGD-e]
CFSAN117492	NODE_4_length_324206_cov_24.982208	107287	109005	-	aut	1-1719/1719	100	99.83	vfdb	NP_464601	(aut) autolysin [Auto (VF0348) - Invasion (VFC0083)] [Listeria monocytogenes EGD-e]
CFSAN117492	NODE_4_length_324206_cov_24.982208	185995	188169	+	clpE	1-2175/2175	100	99.22	vfdb	NP_464522	(clpE) ATP-dependent protease [ClpE (VF0073) - Stress survival (VFC0282)] [Listeria monocytogenes EGD-e]
CFSAN117492	NODE_4_length_324206_cov_24.982208	245265	246260	-	lplA1	1-996/996	100	98.29	vfdb	NP_464456	(lplA1) lipoate protein ligase [LplA1 (VF0347) - Nutritional/Metabolic factor (VFC0272)] [Listeria monocytogenes EGD-e]
CFSAN117492	NODE_5_length_218071_cov_26.281884	125793	126674	-	prsA2	1-882/882	100	99.89	vfdb	NP_465743	(prsA2) post translocation chaperone PrsA2 [PrsA2 (VF0449) - Post-translational modification (VFC0315)] [Listeria monocytogenes EGD-e]
CFSAN117492	NODE_5_length_218071_cov_26.281884	158755	159378	+	hbp1/svpA	1-624/624	100	100	vfdb	NP_465710	(hbp1/svpA) Haemoglobin binding protein 1 [SvpA (VF0263) - Nutritional/Metabolic factor (VFC0272)] [Listeria monocytogenes EGD-e]
CFSAN117492	NODE_5_length_218071_cov_26.281884	159393	161102	+	hbp2	1-1710/1710	100	99.94	vfdb	NP_465709	(hbp2) hypothetical protein [SvpA (VF0263) - Nutritional/Metabolic factor (VFC0272)] [Listeria monocytogenes EGD-e]
CFSAN117492	NODE_6_length_211523_cov_25.864647	190861	192246	+	hpt	1-1386/1386	100	97.62	vfdb	NP_464364	(hpt) hexose phosphate transport protein [Hpt (VF0264) - Nutritional/Metabolic factor (VFC0272)] [Listeria monocytogenes EGD-e]
CFSAN117492	NODE_7_length_125811_cov_26.274593	28469	29086	-	lntA	1-618/618	100	94.66	vfdb	NP_463967	(lntA) listeria nuclear targeted protein A [LntA (VF0440) - Immune modulation (VFC0258)] [Listeria monocytogenes EGD-e]
CFSAN117492	NODE_7_length_125811_cov_26.274593	37689	39581	-	inlB	1-1893/1893	100	99.21	vfdb	NP_463963	(inlB) Internalin B [InlB (VF0070) - Invasion (VFC0083)] [Listeria monocytogenes EGD-e]
CFSAN117492	NODE_7_length_125811_cov_26.274593	39666	42068	-	inlA	1-2403/2403	100	97.79	vfdb	NP_463962	(inlA) Internalin A [InlA (VF0069) - Invasion (VFC0083)] [Listeria monocytogenes EGD-e]
CFSAN117492	NODE_7_length_125811_cov_26.274593	57720	59120	-	pdgA	1-1401/1401	100	99.93	vfdb	NP_463944	(pdgA) Peptidoglycan N-deacetylase [PgdA (VF0442) - Immune modulation (VFC0258)] [Listeria monocytogenes EGD-e]
CFSAN117492	NODE_8_length_122236_cov_25.242890	2839	4275	+	iap/cwhA	1-1449/1449	99.17	98.97	vfdb	NP_464110	(iap/cwhA) P60 extracellular protein invasion associated protein Iap [P60 (VF0068) - Invasion (VFC0083)] [Listeria monocytogenes EGD-e]
CFSAN117492	NODE_9_length_118114_cov_28.787833	50770	51936	-	inlP	1-1167/1167	100	92.89	vfdb	NP_465993	(inlP) internalin P [InlP (VF0577) - Adherence (VFC0001)] [Listeria monocytogenes EGD-e]
CFSAN117492	NODE_9_length_118114_cov_28.787833	53589	54185	-	clpP	1-597/597	100	100	vfdb	NP_465991	(clpP) ATP-dependent Clp protease proteolytic subunit [ClpP (VF0074) - Stress survival (VFC0282)] [Listeria monocytogenes EGD-e]
CFSAN117493	NODE_10_length_110259_cov_18.132704	20186	21067	+	prsA2	1-882/882	100	100	vfdb	NP_465743	(prsA2) post translocation chaperone PrsA2 [PrsA2 (VF0449) - Post-translational modification (VFC0315)] [Listeria monocytogenes EGD-e]
CFSAN117493	NODE_13_length_87127_cov_19.790517	82362	84824	-	clpC	1-2463/2463	100	100	vfdb	NP_463763	(clpC) endopeptidase Clp ATP-binding chain C [ClpC (VF0072) - Stress survival (VFC0282)] [Listeria monocytogenes EGD-e]
CFSAN117493	NODE_15_length_64254_cov_19.713132	30489	31202	-	prfA	1-714/714	100	100	vfdb	NP_463731	(prfA) listeriolysin positive regulatory protein [PrfA (VF0062) - Regulation (VFC0301)] [Listeria monocytogenes EGD-e]
CFSAN117493	NODE_15_length_64254_cov_19.713132	31473	32426	-	plcA	1-954/954	100	100	vfdb	NP_463732	(plcA) phosphatidylinositol-specific phospholipase c [PlcA (VF0063) - Exotoxin (VFC0235)] [Listeria monocytogenes EGD-e]
CFSAN117493	NODE_15_length_64254_cov_19.713132	32668	34257	+	hly	1-1590/1590	100	100	vfdb	NP_463733	(hly) listeriolysin O precursor [LLO (VF0064) - Exotoxin (VFC0235)] [Listeria monocytogenes EGD-e]
CFSAN117493	NODE_15_length_64254_cov_19.713132	34588	36120	+	mpl	1-1533/1533	100	99.94	vfdb	NP_463734	(mpl) Zinc metalloproteinase precursor [Mpl (VF0065) - Exoenzyme (VFC0251)] [Listeria monocytogenes EGD-e]
CFSAN117493	NODE_15_length_64254_cov_19.713132	36319	38238	+	actA	1-1920/1920	100	100	vfdb	NP_463735	(actA) actin-assembly inducing protein precursor [ActA (VF0066) - Motility (VFC0204)] [Listeria monocytogenes EGD-e]
CFSAN117493	NODE_15_length_64254_cov_19.713132	38274	39143	+	plcB	1-870/870	100	100	vfdb	NP_463736	(plcB) phospholipase C [PlcB (VF0067) - Exotoxin (VFC0235)] [Listeria monocytogenes EGD-e]
CFSAN117493	NODE_16_length_54603_cov_13.577612	25646	27363	-	aut	1-1719/1719	99.94	99.83	vfdb	NP_464601	(aut) autolysin [Auto (VF0348) - Invasion (VFC0083)] [Listeria monocytogenes EGD-e]
CFSAN117493	NODE_1_length_369828_cov_19.861226	138839	141394	-	inlJ	1-2556/2556	100	100	vfdb	NP_466343	(inlJ) internalin J [InlJ (VF0445) - Adherence (VFC0001)] [Listeria monocytogenes EGD-e]
CFSAN117493	NODE_20_length_37539_cov_16.598819	23475	25184	-	hbp2	1-1710/1710	100	100	vfdb	NP_465709	(hbp2) hypothetical protein [SvpA (VF0263) - Nutritional/Metabolic factor (VFC0272)] [Listeria monocytogenes EGD-e]
CFSAN117493	NODE_20_length_37539_cov_16.598819	25199	25822	-	hbp1/svpA	1-624/624	100	100	vfdb	NP_465710	(hbp1/svpA) Haemoglobin binding protein 1 [SvpA (VF0263) - Nutritional/Metabolic factor (VFC0272)] [Listeria monocytogenes EGD-e]
CFSAN117493	NODE_21_length_34017_cov_16.450074	19035	20420	-	hpt	1-1386/1386	100	97.83	vfdb	NP_464364	(hpt) hexose phosphate transport protein [Hpt (VF0264) - Nutritional/Metabolic factor (VFC0272)] [Listeria monocytogenes EGD-e]
CFSAN117493	NODE_24_length_32929_cov_18.190385	8507	13642	-	lapB	1-5136/5136	100	98.87	vfdb	NP_465191	(lapB) Listeria adhesion protein LapB [LapB (VF0446) - Adherence (VFC0001)] [Listeria monocytogenes EGD-e]
CFSAN117493	NODE_2_length_268583_cov_15.640168	206654	208522	+	oatA	1-1869/1869	100	99.57	vfdb	NP_464816	(oatA) peptidoglycan O-acetyltransferase [OatA (VF0441) - Immune modulation (VFC0258)] [Listeria monocytogenes EGD-e]
CFSAN117493	NODE_2_length_268583_cov_15.640168	208556	210352	-	inlK	1-1797/1797	100	100	vfdb	NP_464815	(inlK) internalin K [InlK (VF0439) - Immune modulation (VFC0258)] [Listeria monocytogenes EGD-e]
CFSAN117493	NODE_3_length_226188_cov_18.669908	6793	7683	-	inlC	1-891/891	100	100	vfdb	NP_465311	(inlC) internalin C [InlC (VF0438) - Immune modulation (VFC0258)] [Listeria monocytogenes EGD-e]
CFSAN117493	NODE_3_length_226188_cov_18.669908	50355	52067	+	fbpA	1-1713/1713	100	99.88	vfdb	NP_465354	(fbpA) fibronectin-binding protein [FbpA (VF0349) - Adherence (VFC0001)] [Listeria monocytogenes EGD-e]
CFSAN117493	NODE_3_length_226188_cov_18.669908	66639	67103	-	lspA	1-465/465	100	100	vfdb	NP_465369	(lspA) signal peptidase II [Lsp (VF0351) - Post-translational modification (VFC0315)] [Listeria monocytogenes EGD-e]
CFSAN117493	NODE_3_length_226188_cov_18.669908	70028	70960	-	lpeA	1-933/933	100	99.89	vfdb	NP_465372	(lpeA) lipoprotein promoting cell invasion [LpeA (VF0346) - Invasion (VFC0083)] [Listeria monocytogenes EGD-e]
CFSAN117493	NODE_4_length_208393_cov_16.755020	4635	6077	+	iap/cwhA	1-1449/1449	99.59	99.59	vfdb	NP_464110	(iap/cwhA) P60 extracellular protein invasion associated protein Iap [P60 (VF0068) - Invasion (VFC0083)] [Listeria monocytogenes EGD-e]
CFSAN117493	NODE_4_length_208393_cov_16.755020	156798	157415	-	lntA	1-618/618	100	99.68	vfdb	NP_463967	(lntA) listeria nuclear targeted protein A [LntA (VF0440) - Immune modulation (VFC0258)] [Listeria monocytogenes EGD-e]
CFSAN117493	NODE_4_length_208393_cov_16.755020	166020	167912	-	inlB	1-1893/1893	100	100	vfdb	NP_463963	(inlB) Internalin B [InlB (VF0070) - Invasion (VFC0083)] [Listeria monocytogenes EGD-e]
CFSAN117493	NODE_4_length_208393_cov_16.755020	167997	170399	-	inlA	1-2403/2403	100	100	vfdb	NP_463962	(inlA) Internalin A [InlA (VF0069) - Invasion (VFC0083)] [Listeria monocytogenes EGD-e]
CFSAN117493	NODE_4_length_208393_cov_16.755020	186051	187451	-	pdgA	1-1401/1401	100	100	vfdb	NP_463944	(pdgA) Peptidoglycan N-deacetylase [PgdA (VF0442) - Immune modulation (VFC0258)] [Listeria monocytogenes EGD-e]
CFSAN117493	NODE_4_length_208393_cov_16.755020	192839	195304	-	inlF	1-2466/2466	100	100	vfdb	NP_463939	(inlF) internalin F [InlF (VF0447) - Adherence (VFC0001)] [Listeria monocytogenes EGD-e]
CFSAN117493	NODE_5_length_194673_cov_22.039430	37659	40412	-	ami	1-2754/2754	100	99.27	vfdb	NP_466081	(ami) autolysin amidase adhesin [Ami (VF0071) - Adherence (VFC0001)] [Listeria monocytogenes EGD-e]
CFSAN117493	NODE_5_length_194673_cov_22.039430	50162	50599	+	gtcA	1-438/438	100	100	vfdb	NP_466072	(gtcA) wall teichoic acid glycosylation protein GtcA [GtcA (VF0607) - Post-translational modification (VFC0315)] [Listeria monocytogenes EGD-e]
CFSAN117493	NODE_5_length_194673_cov_22.039430	130147	131313	-	inlP	1-1167/1167	100	99.14	vfdb	NP_465993	(inlP) internalin P [InlP (VF0577) - Adherence (VFC0001)] [Listeria monocytogenes EGD-e]
CFSAN117493	NODE_5_length_194673_cov_22.039430	132968	133564	-	clpP	1-597/597	100	100	vfdb	NP_465991	(clpP) ATP-dependent Clp protease proteolytic subunit [ClpP (VF0074) - Stress survival (VFC0282)] [Listeria monocytogenes EGD-e]
CFSAN117493	NODE_6_length_187751_cov_16.419813	49513	51687	+	clpE	1-2175/2175	100	100	vfdb	NP_464522	(clpE) ATP-dependent protease [ClpE (VF0073) - Stress survival (VFC0282)] [Listeria monocytogenes EGD-e]
CFSAN117493	NODE_6_length_187751_cov_16.419813	108781	109776	-	lplA1	1-996/996	100	100	vfdb	NP_464456	(lplA1) lipoate protein ligase [LplA1 (VF0347) - Nutritional/Metabolic factor (VFC0272)] [Listeria monocytogenes EGD-e]
CFSAN117493	NODE_7_length_178152_cov_16.424491	151563	154163	+	lap	1-2601/2601	100	100	vfdb	NP_465159	(lap) Listeria adhesion protein Lap [Lap (VF0444) - Adherence (VFC0001)] [Listeria monocytogenes EGD-e]
CFSAN117493	NODE_8_length_132998_cov_17.566730	65548	66525	+	bsh	1-978/978	100	100	vfdb	NP_465591	(bsh) bile salt hydrolase [BSH (VF0350) - Stress survival (VFC0282)] [Listeria monocytogenes EGD-e]
CFSAN117494	NODE_10_length_90997_cov_16.538990	13090	15555	+	inlF	1-2466/2466	100	100	vfdb	NP_463939	(inlF) internalin F [InlF (VF0447) - Adherence (VFC0001)] [Listeria monocytogenes EGD-e]
CFSAN117494	NODE_10_length_90997_cov_16.538990	20943	22343	+	pdgA	1-1401/1401	100	100	vfdb	NP_463944	(pdgA) Peptidoglycan N-deacetylase [PgdA (VF0442) - Immune modulation (VFC0258)] [Listeria monocytogenes EGD-e]
CFSAN117494	NODE_10_length_90997_cov_16.538990	37995	40397	+	inlA	1-2403/2403	100	100	vfdb	NP_463962	(inlA) Internalin A [InlA (VF0069) - Invasion (VFC0083)] [Listeria monocytogenes EGD-e]
CFSAN117494	NODE_10_length_90997_cov_16.538990	40482	42374	+	inlB	1-1893/1893	100	100	vfdb	NP_463963	(inlB) Internalin B [InlB (VF0070) - Invasion (VFC0083)] [Listeria monocytogenes EGD-e]
CFSAN117494	NODE_10_length_90997_cov_16.538990	50979	51596	+	lntA	1-618/618	100	99.68	vfdb	NP_463967	(lntA) listeria nuclear targeted protein A [LntA (VF0440) - Immune modulation (VFC0258)] [Listeria monocytogenes EGD-e]
CFSAN117494	NODE_11_length_90137_cov_14.691468	25929	27646	-	aut	1-1719/1719	99.94	99.83	vfdb	NP_464601	(aut) autolysin [Auto (VF0348) - Invasion (VFC0083)] [Listeria monocytogenes EGD-e]
CFSAN117494	NODE_13_length_86889_cov_19.281713	82124	84586	-	clpC	1-2463/2463	100	100	vfdb	NP_463763	(clpC) endopeptidase Clp ATP-binding chain C [ClpC (VF0072) - Stress survival (VFC0282)] [Listeria monocytogenes EGD-e]
CFSAN117494	NODE_18_length_64254_cov_19.758058	25112	25981	-	plcB	1-870/870	100	100	vfdb	NP_463736	(plcB) phospholipase C [PlcB (VF0067) - Exotoxin (VFC0235)] [Listeria monocytogenes EGD-e]
CFSAN117494	NODE_18_length_64254_cov_19.758058	26017	27936	-	actA	1-1920/1920	100	100	vfdb	NP_463735	(actA) actin-assembly inducing protein precursor [ActA (VF0066) - Motility (VFC0204)] [Listeria monocytogenes EGD-e]
CFSAN117494	NODE_18_length_64254_cov_19.758058	28135	29667	-	mpl	1-1533/1533	100	99.94	vfdb	NP_463734	(mpl) Zinc metalloproteinase precursor [Mpl (VF0065) - Exoenzyme (VFC0251)] [Listeria monocytogenes EGD-e]
CFSAN117494	NODE_18_length_64254_cov_19.758058	29998	31587	-	hly	1-1590/1590	100	100	vfdb	NP_463733	(hly) listeriolysin O precursor [LLO (VF0064) - Exotoxin (VFC0235)] [Listeria monocytogenes EGD-e]
CFSAN117494	NODE_18_length_64254_cov_19.758058	31829	32782	+	plcA	1-954/954	100	100	vfdb	NP_463732	(plcA) phosphatidylinositol-specific phospholipase c [PlcA (VF0063) - Exotoxin (VFC0235)] [Listeria monocytogenes EGD-e]
CFSAN117494	NODE_18_length_64254_cov_19.758058	33053	33766	+	prfA	1-714/714	100	100	vfdb	NP_463731	(prfA) listeriolysin positive regulatory protein [PrfA (VF0062) - Regulation (VFC0301)] [Listeria monocytogenes EGD-e]
CFSAN117494	NODE_1_length_542575_cov_17.321546	88588	89469	-	prsA2	1-882/882	100	100	vfdb	NP_465743	(prsA2) post translocation chaperone PrsA2 [PrsA2 (VF0449) - Post-translational modification (VFC0315)] [Listeria monocytogenes EGD-e]
CFSAN117494	NODE_1_length_542575_cov_17.321546	121552	122175	+	hbp1/svpA	1-624/624	100	100	vfdb	NP_465710	(hbp1/svpA) Haemoglobin binding protein 1 [SvpA (VF0263) - Nutritional/Metabolic factor (VFC0272)] [Listeria monocytogenes EGD-e]
CFSAN117494	NODE_1_length_542575_cov_17.321546	122190	123899	+	hbp2	1-1710/1710	100	100	vfdb	NP_465709	(hbp2) hypothetical protein [SvpA (VF0263) - Nutritional/Metabolic factor (VFC0272)] [Listeria monocytogenes EGD-e]
CFSAN117494	NODE_1_length_542575_cov_17.321546	248874	249851	+	bsh	1-978/978	100	100	vfdb	NP_465591	(bsh) bile salt hydrolase [BSH (VF0350) - Stress survival (VFC0282)] [Listeria monocytogenes EGD-e]
CFSAN117494	NODE_1_length_542575_cov_17.321546	471544	472476	+	lpeA	1-933/933	100	99.89	vfdb	NP_465372	(lpeA) lipoprotein promoting cell invasion [LpeA (VF0346) - Invasion (VFC0083)] [Listeria monocytogenes EGD-e]
CFSAN117494	NODE_1_length_542575_cov_17.321546	475401	475865	+	lspA	1-465/465	100	100	vfdb	NP_465369	(lspA) signal peptidase II [Lsp (VF0351) - Post-translational modification (VFC0315)] [Listeria monocytogenes EGD-e]
CFSAN117494	NODE_1_length_542575_cov_17.321546	490437	492149	-	fbpA	1-1713/1713	100	99.88	vfdb	NP_465354	(fbpA) fibronectin-binding protein [FbpA (VF0349) - Adherence (VFC0001)] [Listeria monocytogenes EGD-e]
CFSAN117494	NODE_1_length_542575_cov_17.321546	534893	535783	+	inlC	1-891/891	100	100	vfdb	NP_465311	(inlC) internalin C [InlC (VF0438) - Immune modulation (VFC0258)] [Listeria monocytogenes EGD-e]
CFSAN117494	NODE_20_length_34308_cov_17.451245	8483	13618	-	lapB	1-5136/5136	100	98.87	vfdb	NP_465191	(lapB) Listeria adhesion protein LapB [LapB (VF0446) - Adherence (VFC0001)] [Listeria monocytogenes EGD-e]
CFSAN117494	NODE_29_length_10640_cov_14.561781	4889	6274	-	hpt	1-1386/1386	100	97.83	vfdb	NP_464364	(hpt) hexose phosphate transport protein [Hpt (VF0264) - Nutritional/Metabolic factor (VFC0272)] [Listeria monocytogenes EGD-e]
CFSAN117494	NODE_2_length_262519_cov_19.041125	146679	149234	+	inlJ	1-2556/2556	100	100	vfdb	NP_466343	(inlJ) internalin J [InlJ (VF0445) - Adherence (VFC0001)] [Listeria monocytogenes EGD-e]
CFSAN117494	NODE_3_length_259592_cov_14.962665	206654	208522	+	oatA	1-1869/1869	100	99.57	vfdb	NP_464816	(oatA) peptidoglycan O-acetyltransferase [OatA (VF0441) - Immune modulation (VFC0258)] [Listeria monocytogenes EGD-e]
CFSAN117494	NODE_3_length_259592_cov_14.962665	208556	210352	-	inlK	1-1797/1797	100	100	vfdb	NP_464815	(inlK) internalin K [InlK (VF0439) - Immune modulation (VFC0258)] [Listeria monocytogenes EGD-e]
CFSAN117494	NODE_5_length_182875_cov_15.682754	28713	31313	-	lap	1-2601/2601	100	100	vfdb	NP_465159	(lap) Listeria adhesion protein Lap [Lap (VF0444) - Adherence (VFC0001)] [Listeria monocytogenes EGD-e]
CFSAN117494	NODE_6_length_163856_cov_19.671646	32986	33582	+	clpP	1-597/597	100	100	vfdb	NP_465991	(clpP) ATP-dependent Clp protease proteolytic subunit [ClpP (VF0074) - Stress survival (VFC0282)] [Listeria monocytogenes EGD-e]
CFSAN117494	NODE_6_length_163856_cov_19.671646	35237	36403	+	inlP	1-1167/1167	100	99.14	vfdb	NP_465993	(inlP) internalin P [InlP (VF0577) - Adherence (VFC0001)] [Listeria monocytogenes EGD-e]
CFSAN117494	NODE_6_length_163856_cov_19.671646	115951	116388	-	gtcA	1-438/438	100	100	vfdb	NP_466072	(gtcA) wall teichoic acid glycosylation protein GtcA [GtcA (VF0607) - Post-translational modification (VFC0315)] [Listeria monocytogenes EGD-e]
CFSAN117494	NODE_6_length_163856_cov_19.671646	126138	128891	+	ami	1-2754/2754	100	99.27	vfdb	NP_466081	(ami) autolysin amidase adhesin [Ami (VF0071) - Adherence (VFC0001)] [Listeria monocytogenes EGD-e]
CFSAN117494	NODE_7_length_152670_cov_15.967976	77927	78922	+	lplA1	1-996/996	100	100	vfdb	NP_464456	(lplA1) lipoate protein ligase [LplA1 (VF0347) - Nutritional/Metabolic factor (VFC0272)] [Listeria monocytogenes EGD-e]
CFSAN117494	NODE_7_length_152670_cov_15.967976	136016	138190	-	clpE	1-2175/2175	100	100	vfdb	NP_464522	(clpE) ATP-dependent protease [ClpE (VF0073) - Stress survival (VFC0282)] [Listeria monocytogenes EGD-e]
CFSAN117494	NODE_8_length_97292_cov_16.756517	91269	92711	-	iap/cwhA	1-1449/1449	99.59	99.59	vfdb	NP_464110	(iap/cwhA) P60 extracellular protein invasion associated protein Iap [P60 (VF0068) - Invasion (VFC0083)] [Listeria monocytogenes EGD-e]
CFSAN117495	NODE_10_length_109417_cov_29.335355	20156	21037	+	prsA2	1-882/882	100	96.48	vfdb	NP_465743	(prsA2) post translocation chaperone PrsA2 [PrsA2 (VF0449) - Post-translational modification (VFC0315)] [Listeria monocytogenes EGD-e]
CFSAN117495	NODE_11_length_104337_cov_29.295010	24826	26226	-	pdgA	1-1401/1401	100	97	vfdb	NP_463944	(pdgA) Peptidoglycan N-deacetylase [PgdA (VF0442) - Immune modulation (VFC0258)] [Listeria monocytogenes EGD-e]
CFSAN117495	NODE_11_length_104337_cov_29.295010	31612	34083	-	inlF	1-2466/2466	99.96	80.79	vfdb	NP_463939	(inlF) internalin F [InlF (VF0447) - Adherence (VFC0001)] [Listeria monocytogenes EGD-e]
CFSAN117495	NODE_1_length_480703_cov_27.686603	52917	54743	+	inlK	1-1797/1797	100	89	vfdb	NP_464815	(inlK) internalin K [InlK (VF0439) - Immune modulation (VFC0258)] [Listeria monocytogenes EGD-e]
CFSAN117495	NODE_1_length_480703_cov_27.686603	54776	56662	-	oatA	1-1869/1869	100	93.53	vfdb	NP_464816	(oatA) peptidoglycan O-acetyltransferase [OatA (VF0441) - Immune modulation (VFC0258)] [Listeria monocytogenes EGD-e]
CFSAN117495	NODE_1_length_480703_cov_27.686603	412299	414899	+	lap	1-2601/2601	100	97.19	vfdb	NP_465159	(lap) Listeria adhesion protein Lap [Lap (VF0444) - Adherence (VFC0001)] [Listeria monocytogenes EGD-e]
CFSAN117495	NODE_1_length_480703_cov_27.686603	454752	459890	-	lapB	1-5136/5136	100	93.29	vfdb	NP_465191	(lapB) Listeria adhesion protein LapB [LapB (VF0446) - Adherence (VFC0001)] [Listeria monocytogenes EGD-e]
CFSAN117495	NODE_2_length_458116_cov_28.538840	96880	99048	+	clpE	1-2175/2175	99.72	93.47	vfdb	NP_464522	(clpE) ATP-dependent protease [ClpE (VF0073) - Stress survival (VFC0282)] [Listeria monocytogenes EGD-e]
CFSAN117495	NODE_2_length_458116_cov_28.538840	157082	158077	-	lplA1	1-996/996	100	92.77	vfdb	NP_464456	(lplA1) lipoate protein ligase [LplA1 (VF0347) - Nutritional/Metabolic factor (VFC0272)] [Listeria monocytogenes EGD-e]
CFSAN117495	NODE_2_length_458116_cov_28.538840	293038	294423	-	hpt	1-1386/1386	100	97.62	vfdb	NP_464364	(hpt) hexose phosphate transport protein [Hpt (VF0264) - Nutritional/Metabolic factor (VFC0272)] [Listeria monocytogenes EGD-e]
CFSAN117495	NODE_3_length_448165_cov_30.807074	11737	12363	+	hbp1/svpA	1-624/624	100	90.27	vfdb	NP_465710	(hbp1/svpA) Haemoglobin binding protein 1 [SvpA (VF0263) - Nutritional/Metabolic factor (VFC0272)] [Listeria monocytogenes EGD-e]
CFSAN117495	NODE_3_length_448165_cov_30.807074	12376	14085	+	hbp2	1-1710/1710	100	93.51	vfdb	NP_465709	(hbp2) hypothetical protein [SvpA (VF0263) - Nutritional/Metabolic factor (VFC0272)] [Listeria monocytogenes EGD-e]
CFSAN117495	NODE_3_length_448165_cov_30.807074	145643	146620	+	bsh	1-978/978	100	97.75	vfdb	NP_465591	(bsh) bile salt hydrolase [BSH (VF0350) - Stress survival (VFC0282)] [Listeria monocytogenes EGD-e]
CFSAN117495	NODE_3_length_448165_cov_30.807074	377453	378385	+	lpeA	1-933/933	100	96.78	vfdb	NP_465372	(lpeA) lipoprotein promoting cell invasion [LpeA (VF0346) - Invasion (VFC0083)] [Listeria monocytogenes EGD-e]
CFSAN117495	NODE_3_length_448165_cov_30.807074	381310	381774	+	lspA	1-465/465	100	97.42	vfdb	NP_465369	(lspA) signal peptidase II [Lsp (VF0351) - Post-translational modification (VFC0315)] [Listeria monocytogenes EGD-e]
CFSAN117495	NODE_3_length_448165_cov_30.807074	396343	398055	-	fbpA	1-1713/1713	100	91.59	vfdb	NP_465354	(fbpA) fibronectin-binding protein [FbpA (VF0349) - Adherence (VFC0001)] [Listeria monocytogenes EGD-e]
CFSAN117495	NODE_3_length_448165_cov_30.807074	440821	441711	+	inlC	1-891/891	100	97.19	vfdb	NP_465311	(inlC) internalin C [InlC (VF0438) - Immune modulation (VFC0258)] [Listeria monocytogenes EGD-e]
CFSAN117495	NODE_5_length_225566_cov_31.810911	41652	42089	+	gtcA	1-438/438	99.54	80.45	vfdb	NP_466072	(gtcA) wall teichoic acid glycosylation protein GtcA [GtcA (VF0607) - Post-translational modification (VFC0315)] [Listeria monocytogenes EGD-e]
CFSAN117495	NODE_5_length_225566_cov_31.810911	121637	122803	-	inlP	1-1167/1167	100	95.2	vfdb	NP_465993	(inlP) internalin P [InlP (VF0577) - Adherence (VFC0001)] [Listeria monocytogenes EGD-e]
CFSAN117495	NODE_5_length_225566_cov_31.810911	124461	125057	-	clpP	1-597/597	100	96.82	vfdb	NP_465991	(clpP) ATP-dependent Clp protease proteolytic subunit [ClpP (VF0074) - Stress survival (VFC0282)] [Listeria monocytogenes EGD-e]
CFSAN117495	NODE_6_length_225282_cov_28.882676	77230	78657	+	iap/cwhA	1-1449/1449	98.34	95.25	vfdb	NP_464110	(iap/cwhA) P60 extracellular protein invasion associated protein Iap [P60 (VF0068) - Invasion (VFC0083)] [Listeria monocytogenes EGD-e]
CFSAN117495	NODE_6_length_225282_cov_28.882676	213105	213722	-	lntA	1-618/618	100	96.12	vfdb	NP_463967	(lntA) listeria nuclear targeted protein A [LntA (VF0440) - Immune modulation (VFC0258)] [Listeria monocytogenes EGD-e]
CFSAN117495	NODE_6_length_225282_cov_28.882676	215424	217314	-	inlB	1-1891/1893	99.89	92.7	vfdb	NP_463963	(inlB) Internalin B [InlB (VF0070) - Invasion (VFC0083)] [Listeria monocytogenes EGD-e]
CFSAN117495	NODE_6_length_225282_cov_28.882676	217399	219801	-	inlA	1-2403/2403	100	96.75	vfdb	NP_463962	(inlA) Internalin A [InlA (VF0069) - Invasion (VFC0083)] [Listeria monocytogenes EGD-e]
CFSAN117495	NODE_7_length_152317_cov_30.262941	118646	119359	-	prfA	1-714/714	100	97.62	vfdb	NP_463731	(prfA) listeriolysin positive regulatory protein [PrfA (VF0062) - Regulation (VFC0301)] [Listeria monocytogenes EGD-e]
CFSAN117495	NODE_7_length_152317_cov_30.262941	119632	120585	-	plcA	1-954/954	100	97.38	vfdb	NP_463732	(plcA) phosphatidylinositol-specific phospholipase c [PlcA (VF0063) - Exotoxin (VFC0235)] [Listeria monocytogenes EGD-e]
CFSAN117495	NODE_7_length_152317_cov_30.262941	120828	122417	+	hly	1-1590/1590	100	97.3	vfdb	NP_463733	(hly) listeriolysin O precursor [LLO (VF0064) - Exotoxin (VFC0235)] [Listeria monocytogenes EGD-e]
CFSAN117495	NODE_7_length_152317_cov_30.262941	122748	124280	+	mpl	1-1533/1533	100	94.85	vfdb	NP_463734	(mpl) Zinc metalloproteinase precursor [Mpl (VF0065) - Exoenzyme (VFC0251)] [Listeria monocytogenes EGD-e]
CFSAN117495	NODE_7_length_152317_cov_30.262941	126331	127199	+	plcB	2-870/870	99.89	95.51	vfdb	NP_463736	(plcB) phospholipase C [PlcB (VF0067) - Exotoxin (VFC0235)] [Listeria monocytogenes EGD-e]
CFSAN117495	NODE_8_length_150391_cov_27.902924	144366	144953	-	llsP	1-588/588	100	93.71	vfdb	AHK25023	(llsP) CAAX amino terminal protease LlsP [LLS (VF0410) - Exotoxin (VFC0235)] [Listeria innocua SLCC6294]
CFSAN117495	NODE_8_length_150391_cov_27.902924	144946	146259	-	llsD	1-1314/1314	100	98.1	vfdb	AHK25022	(llsD) streptolysin-associated protein LlsD [LLS (VF0410) - Exotoxin (VFC0235)] [Listeria innocua SLCC6294]
CFSAN117495	NODE_8_length_150391_cov_27.902924	146252	147169	-	llsY	1-918/918	100	96.19	vfdb	AHK25021	(llsY) LlsY [LLS (VF0410) - Exotoxin (VFC0235)] [Listeria innocua SLCC6294]
CFSAN117495	NODE_8_length_150391_cov_27.902924	147177	148052	-	llsB	1-876/876	100	97.37	vfdb	AHK25020	(llsB) SagB family dehydrogenase LlsB [LLS (VF0410) - Exotoxin (VFC0235)] [Listeria innocua SLCC6294]
CFSAN117495	NODE_8_length_150391_cov_27.902924	148049	148366	-	llsX	1-318/318	100	97.17	vfdb	AHK25019	(llsX) LlsX [LLS (VF0410) - Exotoxin (VFC0235)] [Listeria innocua SLCC6294]
CFSAN117495	NODE_8_length_150391_cov_27.902924	148407	149156	-	llsH	1-750/750	100	97.47	vfdb	AHK25018	(llsH) ABC transporter permease protein LlsH [LLS (VF0410) - Exotoxin (VFC0235)] [Listeria innocua SLCC6294]
CFSAN117495	NODE_8_length_150391_cov_27.902924	149156	150043	-	llsG	1-888/888	100	97.3	vfdb	AHK25017	(llsG) ABC transporter ATP-binding protein LlsG [LLS (VF0410) - Exotoxin (VFC0235)] [Listeria innocua SLCC6294]
CFSAN117495	NODE_8_length_150391_cov_27.902924	150108	150257	-	llsA	1-150/150	100	98	vfdb	AHK25016	(llsA) listeriolysin S [LLS (VF0410) - Exotoxin (VFC0235)] [Listeria innocua SLCC6294]
CFSAN117495	NODE_9_length_121086_cov_30.696178	15528	16784	+	vip	1-1200/1200	100	85.28	vfdb	NP_463850	(vip) surface adhesin Vip [Vip (VF0443) - Invasion (VFC0083)] [Listeria monocytogenes EGD-e]
CFSAN117495	NODE_9_length_121086_cov_30.696178	116317	118779	-	clpC	1-2463/2463	100	94.07	vfdb	NP_463763	(clpC) endopeptidase Clp ATP-binding chain C [ClpC (VF0072) - Stress survival (VFC0282)] [Listeria monocytogenes EGD-e]
CFSAN117497	NODE_13_length_75060_cov_28.879199	70295	72757	-	clpC	1-2463/2463	100	100	vfdb	NP_463763	(clpC) endopeptidase Clp ATP-binding chain C [ClpC (VF0072) - Stress survival (VFC0282)] [Listeria monocytogenes EGD-e]
CFSAN117497	NODE_18_length_64254_cov_27.519797	25112	25981	-	plcB	1-870/870	100	100	vfdb	NP_463736	(plcB) phospholipase C [PlcB (VF0067) - Exotoxin (VFC0235)] [Listeria monocytogenes EGD-e]
CFSAN117497	NODE_18_length_64254_cov_27.519797	26017	27936	-	actA	1-1920/1920	100	100	vfdb	NP_463735	(actA) actin-assembly inducing protein precursor [ActA (VF0066) - Motility (VFC0204)] [Listeria monocytogenes EGD-e]
CFSAN117497	NODE_18_length_64254_cov_27.519797	28135	29667	-	mpl	1-1533/1533	100	99.94	vfdb	NP_463734	(mpl) Zinc metalloproteinase precursor [Mpl (VF0065) - Exoenzyme (VFC0251)] [Listeria monocytogenes EGD-e]
CFSAN117497	NODE_18_length_64254_cov_27.519797	29998	31587	-	hly	1-1590/1590	100	100	vfdb	NP_463733	(hly) listeriolysin O precursor [LLO (VF0064) - Exotoxin (VFC0235)] [Listeria monocytogenes EGD-e]
CFSAN117497	NODE_18_length_64254_cov_27.519797	31829	32782	+	plcA	1-954/954	100	100	vfdb	NP_463732	(plcA) phosphatidylinositol-specific phospholipase c [PlcA (VF0063) - Exotoxin (VFC0235)] [Listeria monocytogenes EGD-e]
CFSAN117497	NODE_18_length_64254_cov_27.519797	33053	33766	+	prfA	1-714/714	100	100	vfdb	NP_463731	(prfA) listeriolysin positive regulatory protein [PrfA (VF0062) - Regulation (VFC0301)] [Listeria monocytogenes EGD-e]
CFSAN117497	NODE_1_length_393092_cov_24.661751	189323	190765	+	iap/cwhA	1-1449/1449	99.59	99.59	vfdb	NP_464110	(iap/cwhA) P60 extracellular protein invasion associated protein Iap [P60 (VF0068) - Invasion (VFC0083)] [Listeria monocytogenes EGD-e]
CFSAN117497	NODE_1_length_393092_cov_24.661751	341486	342103	-	lntA	1-618/618	100	99.68	vfdb	NP_463967	(lntA) listeria nuclear targeted protein A [LntA (VF0440) - Immune modulation (VFC0258)] [Listeria monocytogenes EGD-e]
CFSAN117497	NODE_1_length_393092_cov_24.661751	350708	352600	-	inlB	1-1893/1893	100	100	vfdb	NP_463963	(inlB) Internalin B [InlB (VF0070) - Invasion (VFC0083)] [Listeria monocytogenes EGD-e]
CFSAN117497	NODE_1_length_393092_cov_24.661751	352685	355087	-	inlA	1-2403/2403	100	100	vfdb	NP_463962	(inlA) Internalin A [InlA (VF0069) - Invasion (VFC0083)] [Listeria monocytogenes EGD-e]
CFSAN117497	NODE_1_length_393092_cov_24.661751	370739	372139	-	pdgA	1-1401/1401	100	100	vfdb	NP_463944	(pdgA) Peptidoglycan N-deacetylase [PgdA (VF0442) - Immune modulation (VFC0258)] [Listeria monocytogenes EGD-e]
CFSAN117497	NODE_1_length_393092_cov_24.661751	377527	379992	-	inlF	1-2466/2466	100	100	vfdb	NP_463939	(inlF) internalin F [InlF (VF0447) - Adherence (VFC0001)] [Listeria monocytogenes EGD-e]
CFSAN117497	NODE_22_length_37084_cov_25.287902	11259	16394	-	lapB	1-5136/5136	100	98.87	vfdb	NP_465191	(lapB) Listeria adhesion protein LapB [LapB (VF0446) - Adherence (VFC0001)] [Listeria monocytogenes EGD-e]
CFSAN117497	NODE_23_length_31552_cov_21.165282	13598	14983	+	hpt	1-1386/1386	100	97.83	vfdb	NP_464364	(hpt) hexose phosphate transport protein [Hpt (VF0264) - Nutritional/Metabolic factor (VFC0272)] [Listeria monocytogenes EGD-e]
CFSAN117497	NODE_2_length_343063_cov_27.715921	228924	231479	+	inlJ	1-2556/2556	100	100	vfdb	NP_466343	(inlJ) internalin J [InlJ (VF0445) - Adherence (VFC0001)] [Listeria monocytogenes EGD-e]
CFSAN117497	NODE_3_length_272667_cov_23.045014	99162	100139	-	bsh	1-978/978	100	100	vfdb	NP_465591	(bsh) bile salt hydrolase [BSH (VF0350) - Stress survival (VFC0282)] [Listeria monocytogenes EGD-e]
CFSAN117497	NODE_3_length_272667_cov_23.045014	225114	226823	-	hbp2	1-1710/1710	100	100	vfdb	NP_465709	(hbp2) hypothetical protein [SvpA (VF0263) - Nutritional/Metabolic factor (VFC0272)] [Listeria monocytogenes EGD-e]
CFSAN117497	NODE_3_length_272667_cov_23.045014	226838	227461	-	hbp1/svpA	1-624/624	100	100	vfdb	NP_465710	(hbp1/svpA) Haemoglobin binding protein 1 [SvpA (VF0263) - Nutritional/Metabolic factor (VFC0272)] [Listeria monocytogenes EGD-e]
CFSAN117497	NODE_3_length_272667_cov_23.045014	259544	260425	+	prsA2	1-882/882	100	100	vfdb	NP_465743	(prsA2) post translocation chaperone PrsA2 [PrsA2 (VF0449) - Post-translational modification (VFC0315)] [Listeria monocytogenes EGD-e]
CFSAN117497	NODE_4_length_193478_cov_19.276626	27597	28592	+	lplA1	1-996/996	100	100	vfdb	NP_464456	(lplA1) lipoate protein ligase [LplA1 (VF0347) - Nutritional/Metabolic factor (VFC0272)] [Listeria monocytogenes EGD-e]
CFSAN117497	NODE_4_length_193478_cov_19.276626	85686	87860	-	clpE	1-2175/2175	100	100	vfdb	NP_464522	(clpE) ATP-dependent protease [ClpE (VF0073) - Stress survival (VFC0282)] [Listeria monocytogenes EGD-e]
CFSAN117497	NODE_4_length_193478_cov_19.276626	164856	166573	+	aut	1-1719/1719	99.94	99.83	vfdb	NP_464601	(aut) autolysin [Auto (VF0348) - Invasion (VFC0083)] [Listeria monocytogenes EGD-e]
CFSAN117497	NODE_5_length_192239_cov_26.462017	35182	37935	-	ami	1-2754/2754	100	99.27	vfdb	NP_466081	(ami) autolysin amidase adhesin [Ami (VF0071) - Adherence (VFC0001)] [Listeria monocytogenes EGD-e]
CFSAN117497	NODE_5_length_192239_cov_26.462017	47685	48122	+	gtcA	1-438/438	100	100	vfdb	NP_466072	(gtcA) wall teichoic acid glycosylation protein GtcA [GtcA (VF0607) - Post-translational modification (VFC0315)] [Listeria monocytogenes EGD-e]
CFSAN117497	NODE_5_length_192239_cov_26.462017	127670	128836	-	inlP	1-1167/1167	100	99.14	vfdb	NP_465993	(inlP) internalin P [InlP (VF0577) - Adherence (VFC0001)] [Listeria monocytogenes EGD-e]
CFSAN117497	NODE_5_length_192239_cov_26.462017	130491	131087	-	clpP	1-597/597	100	100	vfdb	NP_465991	(clpP) ATP-dependent Clp protease proteolytic subunit [ClpP (VF0074) - Stress survival (VFC0282)] [Listeria monocytogenes EGD-e]
CFSAN117497	NODE_6_length_180694_cov_21.027181	15457	17325	+	oatA	1-1869/1869	100	99.57	vfdb	NP_464816	(oatA) peptidoglycan O-acetyltransferase [OatA (VF0441) - Immune modulation (VFC0258)] [Listeria monocytogenes EGD-e]
CFSAN117497	NODE_6_length_180694_cov_21.027181	17359	19155	-	inlK	1-1797/1797	100	100	vfdb	NP_464815	(inlK) internalin K [InlK (VF0439) - Immune modulation (VFC0258)] [Listeria monocytogenes EGD-e]
CFSAN117497	NODE_7_length_162851_cov_24.855940	6399	7289	-	inlC	1-891/891	100	100	vfdb	NP_465311	(inlC) internalin C [InlC (VF0438) - Immune modulation (VFC0258)] [Listeria monocytogenes EGD-e]
CFSAN117497	NODE_7_length_162851_cov_24.855940	50321	52033	+	fbpA	1-1713/1713	100	99.88	vfdb	NP_465354	(fbpA) fibronectin-binding protein [FbpA (VF0349) - Adherence (VFC0001)] [Listeria monocytogenes EGD-e]
CFSAN117497	NODE_7_length_162851_cov_24.855940	66605	67069	-	lspA	1-465/465	100	100	vfdb	NP_465369	(lspA) signal peptidase II [Lsp (VF0351) - Post-translational modification (VFC0315)] [Listeria monocytogenes EGD-e]
CFSAN117497	NODE_7_length_162851_cov_24.855940	69994	70926	-	lpeA	1-933/933	100	99.89	vfdb	NP_465372	(lpeA) lipoprotein promoting cell invasion [LpeA (VF0346) - Invasion (VFC0083)] [Listeria monocytogenes EGD-e]
CFSAN117497	NODE_8_length_122856_cov_20.023532	25909	28509	-	lap	1-2601/2601	100	100	vfdb	NP_465159	(lap) Listeria adhesion protein Lap [Lap (VF0444) - Adherence (VFC0001)] [Listeria monocytogenes EGD-e]
CFSAN117498	NODE_11_length_88798_cov_13.643401	13090	15555	+	inlF	1-2466/2466	100	100	vfdb	NP_463939	(inlF) internalin F [InlF (VF0447) - Adherence (VFC0001)] [Listeria monocytogenes EGD-e]
CFSAN117498	NODE_11_length_88798_cov_13.643401	20943	22343	+	pdgA	1-1401/1401	100	100	vfdb	NP_463944	(pdgA) Peptidoglycan N-deacetylase [PgdA (VF0442) - Immune modulation (VFC0258)] [Listeria monocytogenes EGD-e]
CFSAN117498	NODE_11_length_88798_cov_13.643401	37995	40397	+	inlA	1-2403/2403	100	100	vfdb	NP_463962	(inlA) Internalin A [InlA (VF0069) - Invasion (VFC0083)] [Listeria monocytogenes EGD-e]
CFSAN117498	NODE_11_length_88798_cov_13.643401	40482	42374	+	inlB	1-1893/1893	100	100	vfdb	NP_463963	(inlB) Internalin B [InlB (VF0070) - Invasion (VFC0083)] [Listeria monocytogenes EGD-e]
CFSAN117498	NODE_11_length_88798_cov_13.643401	50979	51596	+	lntA	1-618/618	100	99.68	vfdb	NP_463967	(lntA) listeria nuclear targeted protein A [LntA (VF0440) - Immune modulation (VFC0258)] [Listeria monocytogenes EGD-e]
CFSAN117498	NODE_13_length_86964_cov_15.748310	82199	84661	-	clpC	1-2463/2463	100	100	vfdb	NP_463763	(clpC) endopeptidase Clp ATP-binding chain C [ClpC (VF0072) - Stress survival (VFC0282)] [Listeria monocytogenes EGD-e]
CFSAN117498	NODE_14_length_86074_cov_12.538658	1806	3602	+	inlK	1-1797/1797	100	100	vfdb	NP_464815	(inlK) internalin K [InlK (VF0439) - Immune modulation (VFC0258)] [Listeria monocytogenes EGD-e]
CFSAN117498	NODE_14_length_86074_cov_12.538658	3636	5504	-	oatA	1-1869/1869	100	99.57	vfdb	NP_464816	(oatA) peptidoglycan O-acetyltransferase [OatA (VF0441) - Immune modulation (VFC0258)] [Listeria monocytogenes EGD-e]
CFSAN117498	NODE_17_length_64445_cov_16.207625	25303	26172	-	plcB	1-870/870	100	100	vfdb	NP_463736	(plcB) phospholipase C [PlcB (VF0067) - Exotoxin (VFC0235)] [Listeria monocytogenes EGD-e]
CFSAN117498	NODE_17_length_64445_cov_16.207625	26208	28127	-	actA	1-1920/1920	100	100	vfdb	NP_463735	(actA) actin-assembly inducing protein precursor [ActA (VF0066) - Motility (VFC0204)] [Listeria monocytogenes EGD-e]
CFSAN117498	NODE_17_length_64445_cov_16.207625	28326	29858	-	mpl	1-1533/1533	100	99.94	vfdb	NP_463734	(mpl) Zinc metalloproteinase precursor [Mpl (VF0065) - Exoenzyme (VFC0251)] [Listeria monocytogenes EGD-e]
CFSAN117498	NODE_17_length_64445_cov_16.207625	30189	31778	-	hly	1-1590/1590	100	100	vfdb	NP_463733	(hly) listeriolysin O precursor [LLO (VF0064) - Exotoxin (VFC0235)] [Listeria monocytogenes EGD-e]
CFSAN117498	NODE_17_length_64445_cov_16.207625	32020	32973	+	plcA	1-954/954	100	100	vfdb	NP_463732	(plcA) phosphatidylinositol-specific phospholipase c [PlcA (VF0063) - Exotoxin (VFC0235)] [Listeria monocytogenes EGD-e]
CFSAN117498	NODE_17_length_64445_cov_16.207625	33244	33957	+	prfA	1-714/714	100	100	vfdb	NP_463731	(prfA) listeriolysin positive regulatory protein [PrfA (VF0062) - Regulation (VFC0301)] [Listeria monocytogenes EGD-e]
CFSAN117498	NODE_1_length_282278_cov_16.399609	228924	231479	+	inlJ	1-2556/2556	100	100	vfdb	NP_466343	(inlJ) internalin J [InlJ (VF0445) - Adherence (VFC0001)] [Listeria monocytogenes EGD-e]
CFSAN117498	NODE_22_length_38196_cov_13.431847	24281	25990	-	hbp2	1-1710/1710	100	100	vfdb	NP_465709	(hbp2) hypothetical protein [SvpA (VF0263) - Nutritional/Metabolic factor (VFC0272)] [Listeria monocytogenes EGD-e]
CFSAN117498	NODE_22_length_38196_cov_13.431847	26005	26628	-	hbp1/svpA	1-624/624	100	100	vfdb	NP_465710	(hbp1/svpA) Haemoglobin binding protein 1 [SvpA (VF0263) - Nutritional/Metabolic factor (VFC0272)] [Listeria monocytogenes EGD-e]
CFSAN117498	NODE_23_length_34303_cov_14.823736	8478	13613	-	lapB	1-5136/5136	100	98.87	vfdb	NP_465191	(lapB) Listeria adhesion protein LapB [LapB (VF0446) - Adherence (VFC0001)] [Listeria monocytogenes EGD-e]
CFSAN117498	NODE_25_length_31911_cov_11.327366	2911	4628	-	aut	1-1719/1719	99.94	99.77	vfdb	NP_464601	(aut) autolysin [Auto (VF0348) - Invasion (VFC0083)] [Listeria monocytogenes EGD-e]
CFSAN117498	NODE_2_length_251853_cov_13.820893	140758	142200	+	iap/cwhA	1-1449/1449	99.59	99.59	vfdb	NP_464110	(iap/cwhA) P60 extracellular protein invasion associated protein Iap [P60 (VF0068) - Invasion (VFC0083)] [Listeria monocytogenes EGD-e]
CFSAN117498	NODE_31_length_19979_cov_12.243754	13598	14983	+	hpt	1-1386/1386	100	97.83	vfdb	NP_464364	(hpt) hexose phosphate transport protein [Hpt (VF0264) - Nutritional/Metabolic factor (VFC0272)] [Listeria monocytogenes EGD-e]
CFSAN117498	NODE_32_length_16984_cov_12.364596	6396	7286	-	inlC	1-891/891	100	100	vfdb	NP_465311	(inlC) internalin C [InlC (VF0438) - Immune modulation (VFC0258)] [Listeria monocytogenes EGD-e]
CFSAN117498	NODE_3_length_216742_cov_14.406398	115062	116039	-	bsh	1-978/978	100	100	vfdb	NP_465591	(bsh) bile salt hydrolase [BSH (VF0350) - Stress survival (VFC0282)] [Listeria monocytogenes EGD-e]
CFSAN117498	NODE_4_length_180549_cov_13.119038	151993	154593	+	lap	1-2601/2601	100	100	vfdb	NP_465159	(lap) Listeria adhesion protein Lap [Lap (VF0444) - Adherence (VFC0001)] [Listeria monocytogenes EGD-e]
CFSAN117498	NODE_5_length_164202_cov_16.363998	33116	33712	+	clpP	1-597/597	100	100	vfdb	NP_465991	(clpP) ATP-dependent Clp protease proteolytic subunit [ClpP (VF0074) - Stress survival (VFC0282)] [Listeria monocytogenes EGD-e]
CFSAN117498	NODE_5_length_164202_cov_16.363998	35367	36533	+	inlP	1-1167/1167	100	99.14	vfdb	NP_465993	(inlP) internalin P [InlP (VF0577) - Adherence (VFC0001)] [Listeria monocytogenes EGD-e]
CFSAN117498	NODE_5_length_164202_cov_16.363998	116081	116518	-	gtcA	1-438/438	100	100	vfdb	NP_466072	(gtcA) wall teichoic acid glycosylation protein GtcA [GtcA (VF0607) - Post-translational modification (VFC0315)] [Listeria monocytogenes EGD-e]
CFSAN117498	NODE_5_length_164202_cov_16.363998	126268	129021	+	ami	1-2754/2754	100	99.27	vfdb	NP_466081	(ami) autolysin amidase adhesin [Ami (VF0071) - Adherence (VFC0001)] [Listeria monocytogenes EGD-e]
CFSAN117498	NODE_6_length_160696_cov_14.889487	33461	35173	+	fbpA	1-1713/1713	100	99.88	vfdb	NP_465354	(fbpA) fibronectin-binding protein [FbpA (VF0349) - Adherence (VFC0001)] [Listeria monocytogenes EGD-e]
CFSAN117498	NODE_6_length_160696_cov_14.889487	49745	50209	-	lspA	1-465/465	100	100	vfdb	NP_465369	(lspA) signal peptidase II [Lsp (VF0351) - Post-translational modification (VFC0315)] [Listeria monocytogenes EGD-e]
CFSAN117498	NODE_6_length_160696_cov_14.889487	53134	54066	-	lpeA	1-933/933	100	100	vfdb	NP_465372	(lpeA) lipoprotein promoting cell invasion [LpeA (VF0346) - Invasion (VFC0083)] [Listeria monocytogenes EGD-e]
CFSAN117498	NODE_7_length_153007_cov_13.515509	14831	17005	+	clpE	1-2175/2175	100	100	vfdb	NP_464522	(clpE) ATP-dependent protease [ClpE (VF0073) - Stress survival (VFC0282)] [Listeria monocytogenes EGD-e]
CFSAN117498	NODE_7_length_153007_cov_13.515509	74099	75094	-	lplA1	1-996/996	100	100	vfdb	NP_464456	(lplA1) lipoate protein ligase [LplA1 (VF0347) - Nutritional/Metabolic factor (VFC0272)] [Listeria monocytogenes EGD-e]
CFSAN117498	NODE_9_length_109159_cov_14.679213	20489	21370	+	prsA2	1-882/882	100	100	vfdb	NP_465743	(prsA2) post translocation chaperone PrsA2 [PrsA2 (VF0449) - Post-translational modification (VFC0315)] [Listeria monocytogenes EGD-e]
CFSAN117501	NODE_12_length_87753_cov_30.041506	2271	4733	+	clpC	1-2463/2463	100	100	vfdb	NP_463763	(clpC) endopeptidase Clp ATP-binding chain C [ClpC (VF0072) - Stress survival (VFC0282)] [Listeria monocytogenes EGD-e]
CFSAN117501	NODE_13_length_64254_cov_30.020553	30489	31202	-	prfA	1-714/714	100	100	vfdb	NP_463731	(prfA) listeriolysin positive regulatory protein [PrfA (VF0062) - Regulation (VFC0301)] [Listeria monocytogenes EGD-e]
CFSAN117501	NODE_13_length_64254_cov_30.020553	31473	32426	-	plcA	1-954/954	100	100	vfdb	NP_463732	(plcA) phosphatidylinositol-specific phospholipase c [PlcA (VF0063) - Exotoxin (VFC0235)] [Listeria monocytogenes EGD-e]
CFSAN117501	NODE_13_length_64254_cov_30.020553	32668	34257	+	hly	1-1590/1590	100	100	vfdb	NP_463733	(hly) listeriolysin O precursor [LLO (VF0064) - Exotoxin (VFC0235)] [Listeria monocytogenes EGD-e]
CFSAN117501	NODE_13_length_64254_cov_30.020553	34588	36120	+	mpl	1-1533/1533	100	99.94	vfdb	NP_463734	(mpl) Zinc metalloproteinase precursor [Mpl (VF0065) - Exoenzyme (VFC0251)] [Listeria monocytogenes EGD-e]
CFSAN117501	NODE_13_length_64254_cov_30.020553	36319	38238	+	actA	1-1920/1920	100	100	vfdb	NP_463735	(actA) actin-assembly inducing protein precursor [ActA (VF0066) - Motility (VFC0204)] [Listeria monocytogenes EGD-e]
CFSAN117501	NODE_13_length_64254_cov_30.020553	38274	39143	+	plcB	1-870/870	100	100	vfdb	NP_463736	(plcB) phospholipase C [PlcB (VF0067) - Exotoxin (VFC0235)] [Listeria monocytogenes EGD-e]
CFSAN117501	NODE_16_length_34165_cov_25.758946	19184	20569	-	hpt	1-1386/1386	100	97.83	vfdb	NP_464364	(hpt) hexose phosphate transport protein [Hpt (VF0264) - Nutritional/Metabolic factor (VFC0272)] [Listeria monocytogenes EGD-e]
CFSAN117501	NODE_1_length_435771_cov_26.497223	232012	233454	+	iap/cwhA	1-1449/1449	99.59	99.59	vfdb	NP_464110	(iap/cwhA) P60 extracellular protein invasion associated protein Iap [P60 (VF0068) - Invasion (VFC0083)] [Listeria monocytogenes EGD-e]
CFSAN117501	NODE_1_length_435771_cov_26.497223	384175	384792	-	lntA	1-618/618	100	99.68	vfdb	NP_463967	(lntA) listeria nuclear targeted protein A [LntA (VF0440) - Immune modulation (VFC0258)] [Listeria monocytogenes EGD-e]
CFSAN117501	NODE_1_length_435771_cov_26.497223	393397	395289	-	inlB	1-1893/1893	100	100	vfdb	NP_463963	(inlB) Internalin B [InlB (VF0070) - Invasion (VFC0083)] [Listeria monocytogenes EGD-e]
CFSAN117501	NODE_1_length_435771_cov_26.497223	395374	397776	-	inlA	1-2403/2403	100	100	vfdb	NP_463962	(inlA) Internalin A [InlA (VF0069) - Invasion (VFC0083)] [Listeria monocytogenes EGD-e]
CFSAN117501	NODE_1_length_435771_cov_26.497223	413428	414829	-	pdgA	1-1401/1401	100	99.93	vfdb	NP_463944	(pdgA) Peptidoglycan N-deacetylase [PgdA (VF0442) - Immune modulation (VFC0258)] [Listeria monocytogenes EGD-e]
CFSAN117501	NODE_1_length_435771_cov_26.497223	420217	422682	-	inlF	1-2466/2466	100	100	vfdb	NP_463939	(inlF) internalin F [InlF (VF0447) - Adherence (VFC0001)] [Listeria monocytogenes EGD-e]
CFSAN117501	NODE_2_length_361979_cov_27.909913	6793	7683	-	inlC	1-891/891	100	100	vfdb	NP_465311	(inlC) internalin C [InlC (VF0438) - Immune modulation (VFC0258)] [Listeria monocytogenes EGD-e]
CFSAN117501	NODE_2_length_361979_cov_27.909913	50715	52427	+	fbpA	1-1713/1713	100	99.88	vfdb	NP_465354	(fbpA) fibronectin-binding protein [FbpA (VF0349) - Adherence (VFC0001)] [Listeria monocytogenes EGD-e]
CFSAN117501	NODE_2_length_361979_cov_27.909913	66999	67463	-	lspA	1-465/465	100	100	vfdb	NP_465369	(lspA) signal peptidase II [Lsp (VF0351) - Post-translational modification (VFC0315)] [Listeria monocytogenes EGD-e]
CFSAN117501	NODE_2_length_361979_cov_27.909913	70388	71320	-	lpeA	1-933/933	100	100	vfdb	NP_465372	(lpeA) lipoprotein promoting cell invasion [LpeA (VF0346) - Invasion (VFC0083)] [Listeria monocytogenes EGD-e]
CFSAN117501	NODE_2_length_361979_cov_27.909913	293013	293990	-	bsh	1-978/978	100	100	vfdb	NP_465591	(bsh) bile salt hydrolase [BSH (VF0350) - Stress survival (VFC0282)] [Listeria monocytogenes EGD-e]
CFSAN117501	NODE_3_length_298834_cov_28.905791	193618	196173	-	inlJ	1-2556/2556	100	100	vfdb	NP_466343	(inlJ) internalin J [InlJ (VF0445) - Adherence (VFC0001)] [Listeria monocytogenes EGD-e]
CFSAN117501	NODE_4_length_259958_cov_23.809061	206643	208511	+	oatA	1-1869/1869	100	99.57	vfdb	NP_464816	(oatA) peptidoglycan O-acetyltransferase [OatA (VF0441) - Immune modulation (VFC0258)] [Listeria monocytogenes EGD-e]
CFSAN117501	NODE_4_length_259958_cov_23.809061	208545	210341	-	inlK	1-1797/1797	100	100	vfdb	NP_464815	(inlK) internalin K [InlK (VF0439) - Immune modulation (VFC0258)] [Listeria monocytogenes EGD-e]
CFSAN117501	NODE_5_length_243827_cov_24.280131	27046	28763	-	aut	1-1719/1719	99.94	99.77	vfdb	NP_464601	(aut) autolysin [Auto (VF0348) - Invasion (VFC0083)] [Listeria monocytogenes EGD-e]
CFSAN117501	NODE_5_length_243827_cov_24.280131	105759	107933	+	clpE	1-2175/2175	100	100	vfdb	NP_464522	(clpE) ATP-dependent protease [ClpE (VF0073) - Stress survival (VFC0282)] [Listeria monocytogenes EGD-e]
CFSAN117501	NODE_5_length_243827_cov_24.280131	165027	166022	-	lplA1	1-996/996	100	100	vfdb	NP_464456	(lplA1) lipoate protein ligase [LplA1 (VF0347) - Nutritional/Metabolic factor (VFC0272)] [Listeria monocytogenes EGD-e]
CFSAN117501	NODE_6_length_229824_cov_30.034006	35182	37935	-	ami	1-2754/2754	100	99.27	vfdb	NP_466081	(ami) autolysin amidase adhesin [Ami (VF0071) - Adherence (VFC0001)] [Listeria monocytogenes EGD-e]
CFSAN117501	NODE_6_length_229824_cov_30.034006	47685	48122	+	gtcA	1-438/438	100	100	vfdb	NP_466072	(gtcA) wall teichoic acid glycosylation protein GtcA [GtcA (VF0607) - Post-translational modification (VFC0315)] [Listeria monocytogenes EGD-e]
CFSAN117501	NODE_6_length_229824_cov_30.034006	127670	128836	-	inlP	1-1167/1167	100	99.14	vfdb	NP_465993	(inlP) internalin P [InlP (VF0577) - Adherence (VFC0001)] [Listeria monocytogenes EGD-e]
CFSAN117501	NODE_6_length_229824_cov_30.034006	130491	131087	-	clpP	1-597/597	100	100	vfdb	NP_465991	(clpP) ATP-dependent Clp protease proteolytic subunit [ClpP (VF0074) - Stress survival (VFC0282)] [Listeria monocytogenes EGD-e]
CFSAN117501	NODE_7_length_217173_cov_25.522511	20691	25826	+	lapB	1-5136/5136	100	98.87	vfdb	NP_465191	(lapB) Listeria adhesion protein LapB [LapB (VF0446) - Adherence (VFC0001)] [Listeria monocytogenes EGD-e]
CFSAN117501	NODE_7_length_217173_cov_25.522511	63011	65611	-	lap	1-2601/2601	100	100	vfdb	NP_465159	(lap) Listeria adhesion protein Lap [Lap (VF0444) - Adherence (VFC0001)] [Listeria monocytogenes EGD-e]
CFSAN117501	NODE_8_length_172303_cov_26.688243	79994	80875	-	prsA2	1-882/882	100	100	vfdb	NP_465743	(prsA2) post translocation chaperone PrsA2 [PrsA2 (VF0449) - Post-translational modification (VFC0315)] [Listeria monocytogenes EGD-e]
CFSAN117501	NODE_8_length_172303_cov_26.688243	112958	113581	+	hbp1/svpA	1-624/624	100	100	vfdb	NP_465710	(hbp1/svpA) Haemoglobin binding protein 1 [SvpA (VF0263) - Nutritional/Metabolic factor (VFC0272)] [Listeria monocytogenes EGD-e]
CFSAN117501	NODE_8_length_172303_cov_26.688243	113596	115305	+	hbp2	1-1710/1710	100	100	vfdb	NP_465709	(hbp2) hypothetical protein [SvpA (VF0263) - Nutritional/Metabolic factor (VFC0272)] [Listeria monocytogenes EGD-e]
CFSAN117503	NODE_10_length_119359_cov_25.952186	114627	117089	-	clpC	1-2463/2463	100	100	vfdb	NP_463763	(clpC) endopeptidase Clp ATP-binding chain C [ClpC (VF0072) - Stress survival (VFC0282)] [Listeria monocytogenes EGD-e]
CFSAN117503	NODE_11_length_64242_cov_26.691741	25100	25969	-	plcB	1-870/870	100	100	vfdb	NP_463736	(plcB) phospholipase C [PlcB (VF0067) - Exotoxin (VFC0235)] [Listeria monocytogenes EGD-e]
CFSAN117503	NODE_11_length_64242_cov_26.691741	26005	27924	-	actA	1-1920/1920	100	100	vfdb	NP_463735	(actA) actin-assembly inducing protein precursor [ActA (VF0066) - Motility (VFC0204)] [Listeria monocytogenes EGD-e]
CFSAN117503	NODE_11_length_64242_cov_26.691741	28123	29655	-	mpl	1-1533/1533	100	99.94	vfdb	NP_463734	(mpl) Zinc metalloproteinase precursor [Mpl (VF0065) - Exoenzyme (VFC0251)] [Listeria monocytogenes EGD-e]
CFSAN117503	NODE_11_length_64242_cov_26.691741	29986	31575	-	hly	1-1590/1590	100	100	vfdb	NP_463733	(hly) listeriolysin O precursor [LLO (VF0064) - Exotoxin (VFC0235)] [Listeria monocytogenes EGD-e]
CFSAN117503	NODE_11_length_64242_cov_26.691741	31817	32770	+	plcA	1-954/954	100	100	vfdb	NP_463732	(plcA) phosphatidylinositol-specific phospholipase c [PlcA (VF0063) - Exotoxin (VFC0235)] [Listeria monocytogenes EGD-e]
CFSAN117503	NODE_11_length_64242_cov_26.691741	33041	33754	+	prfA	1-714/714	100	100	vfdb	NP_463731	(prfA) listeriolysin positive regulatory protein [PrfA (VF0062) - Regulation (VFC0301)] [Listeria monocytogenes EGD-e]
CFSAN117503	NODE_1_length_435770_cov_23.726069	232012	233454	+	iap/cwhA	1-1449/1449	99.59	99.59	vfdb	NP_464110	(iap/cwhA) P60 extracellular protein invasion associated protein Iap [P60 (VF0068) - Invasion (VFC0083)] [Listeria monocytogenes EGD-e]
CFSAN117503	NODE_1_length_435770_cov_23.726069	384175	384792	-	lntA	1-618/618	100	99.68	vfdb	NP_463967	(lntA) listeria nuclear targeted protein A [LntA (VF0440) - Immune modulation (VFC0258)] [Listeria monocytogenes EGD-e]
CFSAN117503	NODE_1_length_435770_cov_23.726069	393397	395289	-	inlB	1-1893/1893	100	100	vfdb	NP_463963	(inlB) Internalin B [InlB (VF0070) - Invasion (VFC0083)] [Listeria monocytogenes EGD-e]
CFSAN117503	NODE_1_length_435770_cov_23.726069	395374	397776	-	inlA	1-2403/2403	100	100	vfdb	NP_463962	(inlA) Internalin A [InlA (VF0069) - Invasion (VFC0083)] [Listeria monocytogenes EGD-e]
CFSAN117503	NODE_1_length_435770_cov_23.726069	413428	414828	-	pdgA	1-1401/1401	100	100	vfdb	NP_463944	(pdgA) Peptidoglycan N-deacetylase [PgdA (VF0442) - Immune modulation (VFC0258)] [Listeria monocytogenes EGD-e]
CFSAN117503	NODE_1_length_435770_cov_23.726069	420216	422681	-	inlF	1-2466/2466	100	100	vfdb	NP_463939	(inlF) internalin F [InlF (VF0447) - Adherence (VFC0001)] [Listeria monocytogenes EGD-e]
CFSAN117503	NODE_2_length_424702_cov_26.612410	228530	231085	+	inlJ	1-2556/2556	100	100	vfdb	NP_466343	(inlJ) internalin J [InlJ (VF0445) - Adherence (VFC0001)] [Listeria monocytogenes EGD-e]
CFSAN117503	NODE_3_length_414821_cov_25.192028	206643	208511	+	oatA	1-1869/1869	100	99.57	vfdb	NP_464816	(oatA) peptidoglycan O-acetyltransferase [OatA (VF0441) - Immune modulation (VFC0258)] [Listeria monocytogenes EGD-e]
CFSAN117503	NODE_3_length_414821_cov_25.192028	208545	210341	-	inlK	1-1797/1797	100	100	vfdb	NP_464815	(inlK) internalin K [InlK (VF0439) - Immune modulation (VFC0258)] [Listeria monocytogenes EGD-e]
CFSAN117503	NODE_4_length_361992_cov_24.960681	68003	68980	+	bsh	1-978/978	100	100	vfdb	NP_465591	(bsh) bile salt hydrolase [BSH (VF0350) - Stress survival (VFC0282)] [Listeria monocytogenes EGD-e]
CFSAN117503	NODE_4_length_361992_cov_24.960681	290673	291605	+	lpeA	1-933/933	100	100	vfdb	NP_465372	(lpeA) lipoprotein promoting cell invasion [LpeA (VF0346) - Invasion (VFC0083)] [Listeria monocytogenes EGD-e]
CFSAN117503	NODE_4_length_361992_cov_24.960681	294530	294994	+	lspA	1-465/465	100	100	vfdb	NP_465369	(lspA) signal peptidase II [Lsp (VF0351) - Post-translational modification (VFC0315)] [Listeria monocytogenes EGD-e]
CFSAN117503	NODE_4_length_361992_cov_24.960681	309566	311278	-	fbpA	1-1713/1713	100	99.88	vfdb	NP_465354	(fbpA) fibronectin-binding protein [FbpA (VF0349) - Adherence (VFC0001)] [Listeria monocytogenes EGD-e]
CFSAN117503	NODE_4_length_361992_cov_24.960681	354310	355200	+	inlC	1-891/891	100	100	vfdb	NP_465311	(inlC) internalin C [InlC (VF0438) - Immune modulation (VFC0258)] [Listeria monocytogenes EGD-e]
CFSAN117503	NODE_5_length_251477_cov_22.887503	13597	14982	+	hpt	1-1386/1386	100	97.83	vfdb	NP_464364	(hpt) hexose phosphate transport protein [Hpt (VF0264) - Nutritional/Metabolic factor (VFC0272)] [Listeria monocytogenes EGD-e]
CFSAN117503	NODE_5_length_251477_cov_22.887503	112256	113251	+	lplA1	1-996/996	100	100	vfdb	NP_464456	(lplA1) lipoate protein ligase [LplA1 (VF0347) - Nutritional/Metabolic factor (VFC0272)] [Listeria monocytogenes EGD-e]
CFSAN117503	NODE_5_length_251477_cov_22.887503	170345	172519	-	clpE	1-2175/2175	100	100	vfdb	NP_464522	(clpE) ATP-dependent protease [ClpE (VF0073) - Stress survival (VFC0282)] [Listeria monocytogenes EGD-e]
CFSAN117503	NODE_5_length_251477_cov_22.887503	249515	251232	+	aut	1-1719/1719	99.94	99.77	vfdb	NP_464601	(aut) autolysin [Auto (VF0348) - Invasion (VFC0083)] [Listeria monocytogenes EGD-e]
CFSAN117503	NODE_6_length_217173_cov_22.638095	151563	154163	+	lap	1-2601/2601	100	100	vfdb	NP_465159	(lap) Listeria adhesion protein Lap [Lap (VF0444) - Adherence (VFC0001)] [Listeria monocytogenes EGD-e]
CFSAN117503	NODE_6_length_217173_cov_22.638095	191348	196483	-	lapB	1-5136/5136	100	98.87	vfdb	NP_465191	(lapB) Listeria adhesion protein LapB [LapB (VF0446) - Adherence (VFC0001)] [Listeria monocytogenes EGD-e]
CFSAN117503	NODE_7_length_192148_cov_27.294192	35182	37935	-	ami	1-2754/2754	100	99.27	vfdb	NP_466081	(ami) autolysin amidase adhesin [Ami (VF0071) - Adherence (VFC0001)] [Listeria monocytogenes EGD-e]
CFSAN117503	NODE_7_length_192148_cov_27.294192	47685	48122	+	gtcA	1-438/438	100	100	vfdb	NP_466072	(gtcA) wall teichoic acid glycosylation protein GtcA [GtcA (VF0607) - Post-translational modification (VFC0315)] [Listeria monocytogenes EGD-e]
CFSAN117503	NODE_7_length_192148_cov_27.294192	127670	128836	-	inlP	1-1167/1167	100	99.14	vfdb	NP_465993	(inlP) internalin P [InlP (VF0577) - Adherence (VFC0001)] [Listeria monocytogenes EGD-e]
CFSAN117503	NODE_7_length_192148_cov_27.294192	130491	131087	-	clpP	1-597/597	100	100	vfdb	NP_465991	(clpP) ATP-dependent Clp protease proteolytic subunit [ClpP (VF0074) - Stress survival (VFC0282)] [Listeria monocytogenes EGD-e]
CFSAN117503	NODE_8_length_180722_cov_24.455378	88372	89253	-	prsA2	1-882/882	100	100	vfdb	NP_465743	(prsA2) post translocation chaperone PrsA2 [PrsA2 (VF0449) - Post-translational modification (VFC0315)] [Listeria monocytogenes EGD-e]
CFSAN117503	NODE_8_length_180722_cov_24.455378	121336	121959	+	hbp1/svpA	1-624/624	100	100	vfdb	NP_465710	(hbp1/svpA) Haemoglobin binding protein 1 [SvpA (VF0263) - Nutritional/Metabolic factor (VFC0272)] [Listeria monocytogenes EGD-e]
CFSAN117503	NODE_8_length_180722_cov_24.455378	121974	123683	+	hbp2	1-1710/1710	100	100	vfdb	NP_465709	(hbp2) hypothetical protein [SvpA (VF0263) - Nutritional/Metabolic factor (VFC0272)] [Listeria monocytogenes EGD-e]
CFSAN117504	NODE_12_length_64254_cov_28.769021	30489	31202	-	prfA	1-714/714	100	100	vfdb	NP_463731	(prfA) listeriolysin positive regulatory protein [PrfA (VF0062) - Regulation (VFC0301)] [Listeria monocytogenes EGD-e]
CFSAN117504	NODE_12_length_64254_cov_28.769021	31473	32426	-	plcA	1-954/954	100	100	vfdb	NP_463732	(plcA) phosphatidylinositol-specific phospholipase c [PlcA (VF0063) - Exotoxin (VFC0235)] [Listeria monocytogenes EGD-e]
CFSAN117504	NODE_12_length_64254_cov_28.769021	32668	34257	+	hly	1-1590/1590	100	100	vfdb	NP_463733	(hly) listeriolysin O precursor [LLO (VF0064) - Exotoxin (VFC0235)] [Listeria monocytogenes EGD-e]
CFSAN117504	NODE_12_length_64254_cov_28.769021	34588	36120	+	mpl	1-1533/1533	100	99.94	vfdb	NP_463734	(mpl) Zinc metalloproteinase precursor [Mpl (VF0065) - Exoenzyme (VFC0251)] [Listeria monocytogenes EGD-e]
CFSAN117504	NODE_12_length_64254_cov_28.769021	36319	38238	+	actA	1-1920/1920	100	100	vfdb	NP_463735	(actA) actin-assembly inducing protein precursor [ActA (VF0066) - Motility (VFC0204)] [Listeria monocytogenes EGD-e]
CFSAN117504	NODE_12_length_64254_cov_28.769021	38274	39143	+	plcB	1-870/870	100	100	vfdb	NP_463736	(plcB) phospholipase C [PlcB (VF0067) - Exotoxin (VFC0235)] [Listeria monocytogenes EGD-e]
CFSAN117504	NODE_16_length_20000_cov_21.560610	13597	14982	+	hpt	1-1386/1386	100	97.83	vfdb	NP_464364	(hpt) hexose phosphate transport protein [Hpt (VF0264) - Nutritional/Metabolic factor (VFC0272)] [Listeria monocytogenes EGD-e]
CFSAN117504	NODE_1_length_424607_cov_28.960545	193618	196173	-	inlJ	1-2556/2556	100	100	vfdb	NP_466343	(inlJ) internalin J [InlJ (VF0445) - Adherence (VFC0001)] [Listeria monocytogenes EGD-e]
CFSAN117504	NODE_2_length_379634_cov_25.366099	129784	130761	-	bsh	1-978/978	100	100	vfdb	NP_465591	(bsh) bile salt hydrolase [BSH (VF0350) - Stress survival (VFC0282)] [Listeria monocytogenes EGD-e]
CFSAN117504	NODE_2_length_379634_cov_25.366099	255736	257445	-	hbp2	1-1710/1710	100	100	vfdb	NP_465709	(hbp2) hypothetical protein [SvpA (VF0263) - Nutritional/Metabolic factor (VFC0272)] [Listeria monocytogenes EGD-e]
CFSAN117504	NODE_2_length_379634_cov_25.366099	257460	258083	-	hbp1/svpA	1-624/624	100	100	vfdb	NP_465710	(hbp1/svpA) Haemoglobin binding protein 1 [SvpA (VF0263) - Nutritional/Metabolic factor (VFC0272)] [Listeria monocytogenes EGD-e]
CFSAN117504	NODE_2_length_379634_cov_25.366099	290166	291047	+	prsA2	1-882/882	100	100	vfdb	NP_465743	(prsA2) post translocation chaperone PrsA2 [PrsA2 (VF0449) - Post-translational modification (VFC0315)] [Listeria monocytogenes EGD-e]
CFSAN117504	NODE_3_length_373989_cov_24.572085	13101	15566	+	inlF	1-2466/2466	100	100	vfdb	NP_463939	(inlF) internalin F [InlF (VF0447) - Adherence (VFC0001)] [Listeria monocytogenes EGD-e]
CFSAN117504	NODE_3_length_373989_cov_24.572085	20954	22354	+	pdgA	1-1401/1401	100	100	vfdb	NP_463944	(pdgA) Peptidoglycan N-deacetylase [PgdA (VF0442) - Immune modulation (VFC0258)] [Listeria monocytogenes EGD-e]
CFSAN117504	NODE_3_length_373989_cov_24.572085	38006	40408	+	inlA	1-2403/2403	100	100	vfdb	NP_463962	(inlA) Internalin A [InlA (VF0069) - Invasion (VFC0083)] [Listeria monocytogenes EGD-e]
CFSAN117504	NODE_3_length_373989_cov_24.572085	40493	42385	+	inlB	1-1893/1893	100	100	vfdb	NP_463963	(inlB) Internalin B [InlB (VF0070) - Invasion (VFC0083)] [Listeria monocytogenes EGD-e]
CFSAN117504	NODE_3_length_373989_cov_24.572085	50990	51607	+	lntA	1-618/618	100	99.68	vfdb	NP_463967	(lntA) listeria nuclear targeted protein A [LntA (VF0440) - Immune modulation (VFC0258)] [Listeria monocytogenes EGD-e]
CFSAN117504	NODE_3_length_373989_cov_24.572085	202328	203770	-	iap/cwhA	1-1449/1449	99.59	99.59	vfdb	NP_464110	(iap/cwhA) P60 extracellular protein invasion associated protein Iap [P60 (VF0068) - Invasion (VFC0083)] [Listeria monocytogenes EGD-e]
CFSAN117504	NODE_4_length_259451_cov_21.686327	206643	208511	+	oatA	1-1869/1869	100	99.57	vfdb	NP_464816	(oatA) peptidoglycan O-acetyltransferase [OatA (VF0441) - Immune modulation (VFC0258)] [Listeria monocytogenes EGD-e]
CFSAN117504	NODE_4_length_259451_cov_21.686327	208545	210341	-	inlK	1-1797/1797	100	100	vfdb	NP_464815	(inlK) internalin K [InlK (VF0439) - Immune modulation (VFC0258)] [Listeria monocytogenes EGD-e]
CFSAN117504	NODE_5_length_257039_cov_22.576618	92133	93128	+	lplA1	1-996/996	100	100	vfdb	NP_464456	(lplA1) lipoate protein ligase [LplA1 (VF0347) - Nutritional/Metabolic factor (VFC0272)] [Listeria monocytogenes EGD-e]
CFSAN117504	NODE_5_length_257039_cov_22.576618	150222	152396	-	clpE	1-2175/2175	100	100	vfdb	NP_464522	(clpE) ATP-dependent protease [ClpE (VF0073) - Stress survival (VFC0282)] [Listeria monocytogenes EGD-e]
CFSAN117504	NODE_5_length_257039_cov_22.576618	229392	231109	+	aut	1-1719/1719	99.94	99.83	vfdb	NP_464601	(aut) autolysin [Auto (VF0348) - Invasion (VFC0083)] [Listeria monocytogenes EGD-e]
CFSAN117504	NODE_6_length_201518_cov_28.921863	34966	37719	-	ami	1-2754/2754	100	99.27	vfdb	NP_466081	(ami) autolysin amidase adhesin [Ami (VF0071) - Adherence (VFC0001)] [Listeria monocytogenes EGD-e]
CFSAN117504	NODE_6_length_201518_cov_28.921863	47469	47906	+	gtcA	1-438/438	100	100	vfdb	NP_466072	(gtcA) wall teichoic acid glycosylation protein GtcA [GtcA (VF0607) - Post-translational modification (VFC0315)] [Listeria monocytogenes EGD-e]
CFSAN117504	NODE_6_length_201518_cov_28.921863	127454	128620	-	inlP	1-1167/1167	100	99.14	vfdb	NP_465993	(inlP) internalin P [InlP (VF0577) - Adherence (VFC0001)] [Listeria monocytogenes EGD-e]
CFSAN117504	NODE_6_length_201518_cov_28.921863	130275	130871	-	clpP	1-597/597	100	100	vfdb	NP_465991	(clpP) ATP-dependent Clp protease proteolytic subunit [ClpP (VF0074) - Stress survival (VFC0282)] [Listeria monocytogenes EGD-e]
CFSAN117504	NODE_7_length_167711_cov_27.008539	2304	4766	+	clpC	1-2463/2463	100	100	vfdb	NP_463763	(clpC) endopeptidase Clp ATP-binding chain C [ClpC (VF0072) - Stress survival (VFC0282)] [Listeria monocytogenes EGD-e]
CFSAN117504	NODE_8_length_163277_cov_26.593760	91958	92890	+	lpeA	1-933/933	100	99.89	vfdb	NP_465372	(lpeA) lipoprotein promoting cell invasion [LpeA (VF0346) - Invasion (VFC0083)] [Listeria monocytogenes EGD-e]
CFSAN117504	NODE_8_length_163277_cov_26.593760	95815	96279	+	lspA	1-465/465	100	100	vfdb	NP_465369	(lspA) signal peptidase II [Lsp (VF0351) - Post-translational modification (VFC0315)] [Listeria monocytogenes EGD-e]
CFSAN117504	NODE_8_length_163277_cov_26.593760	110851	112563	-	fbpA	1-1713/1713	100	99.88	vfdb	NP_465354	(fbpA) fibronectin-binding protein [FbpA (VF0349) - Adherence (VFC0001)] [Listeria monocytogenes EGD-e]
CFSAN117504	NODE_8_length_163277_cov_26.593760	155595	156485	+	inlC	1-891/891	100	100	vfdb	NP_465311	(inlC) internalin C [InlC (VF0438) - Immune modulation (VFC0258)] [Listeria monocytogenes EGD-e]
CFSAN117504	NODE_9_length_158924_cov_22.763472	20691	25826	+	lapB	1-5136/5136	100	98.87	vfdb	NP_465191	(lapB) Listeria adhesion protein LapB [LapB (VF0446) - Adherence (VFC0001)] [Listeria monocytogenes EGD-e]
CFSAN117504	NODE_9_length_158924_cov_22.763472	63011	65611	-	lap	1-2601/2601	100	100	vfdb	NP_465159	(lap) Listeria adhesion protein Lap [Lap (VF0444) - Adherence (VFC0001)] [Listeria monocytogenes EGD-e]
CFSAN117537	NODE_11_length_90313_cov_50.669006	25105	25973	-	plcB	2-870/870	99.89	95.63	vfdb	NP_463736	(plcB) phospholipase C [PlcB (VF0067) - Exotoxin (VFC0235)] [Listeria monocytogenes EGD-e]
CFSAN117537	NODE_11_length_90313_cov_50.669006	26012	27929	-	actA	1-1918/1920	99.9	94.21	vfdb	NP_463735	(actA) actin-assembly inducing protein precursor [ActA (VF0066) - Motility (VFC0204)] [Listeria monocytogenes EGD-e]
CFSAN117537	NODE_11_length_90313_cov_50.669006	28129	29661	-	mpl	1-1533/1533	100	94.91	vfdb	NP_463734	(mpl) Zinc metalloproteinase precursor [Mpl (VF0065) - Exoenzyme (VFC0251)] [Listeria monocytogenes EGD-e]
CFSAN117537	NODE_11_length_90313_cov_50.669006	29996	31585	-	hly	1-1590/1590	100	97.36	vfdb	NP_463733	(hly) listeriolysin O precursor [LLO (VF0064) - Exotoxin (VFC0235)] [Listeria monocytogenes EGD-e]
CFSAN117537	NODE_11_length_90313_cov_50.669006	31828	32781	+	plcA	1-954/954	100	97.28	vfdb	NP_463732	(plcA) phosphatidylinositol-specific phospholipase c [PlcA (VF0063) - Exotoxin (VFC0235)] [Listeria monocytogenes EGD-e]
CFSAN117537	NODE_11_length_90313_cov_50.669006	33054	33767	+	prfA	1-714/714	100	97.48	vfdb	NP_463731	(prfA) listeriolysin positive regulatory protein [PrfA (VF0062) - Regulation (VFC0301)] [Listeria monocytogenes EGD-e]
CFSAN117537	NODE_16_length_41419_cov_58.300494	2271	4733	+	clpC	1-2463/2463	100	94.15	vfdb	NP_463763	(clpC) endopeptidase Clp ATP-binding chain C [ClpC (VF0072) - Stress survival (VFC0282)] [Listeria monocytogenes EGD-e]
CFSAN117537	NODE_1_length_535421_cov_48.753920	20685	25841	+	lapB	1-5136/5136	100	93.08	vfdb	NP_465191	(lapB) Listeria adhesion protein LapB [LapB (VF0446) - Adherence (VFC0001)] [Listeria monocytogenes EGD-e]
CFSAN117537	NODE_1_length_535421_cov_48.753920	65698	68298	-	lap	1-2601/2601	100	96.85	vfdb	NP_465159	(lap) Listeria adhesion protein Lap [Lap (VF0444) - Adherence (VFC0001)] [Listeria monocytogenes EGD-e]
CFSAN117537	NODE_1_length_535421_cov_48.753920	423926	425812	+	oatA	1-1869/1869	100	93.48	vfdb	NP_464816	(oatA) peptidoglycan O-acetyltransferase [OatA (VF0441) - Immune modulation (VFC0258)] [Listeria monocytogenes EGD-e]
CFSAN117537	NODE_1_length_535421_cov_48.753920	425845	427665	-	inlK	1-1797/1797	100	89.18	vfdb	NP_464815	(inlK) internalin K [InlK (VF0439) - Immune modulation (VFC0258)] [Listeria monocytogenes EGD-e]
CFSAN117537	NODE_2_length_406444_cov_52.419990	6431	7321	-	inlC	1-891/891	100	97.19	vfdb	NP_465311	(inlC) internalin C [InlC (VF0438) - Immune modulation (VFC0258)] [Listeria monocytogenes EGD-e]
CFSAN117537	NODE_2_length_406444_cov_52.419990	38213	41440	-	ecbA/fss3	1-3228/3228	100	87.95	vfdb	WP_002286924	(ecbA/fss3) Collagen binding MSCRAMM EcbA/Fss3 [EcbA (VF0539) - Adherence (VFC0001)] [Enterococcus faecium DO]
CFSAN117537	NODE_2_length_406444_cov_52.419990	84526	86238	+	fbpA	1-1713/1713	100	91.71	vfdb	NP_465354	(fbpA) fibronectin-binding protein [FbpA (VF0349) - Adherence (VFC0001)] [Listeria monocytogenes EGD-e]
CFSAN117537	NODE_2_length_406444_cov_52.419990	100809	101273	-	lspA	1-465/465	100	97.42	vfdb	NP_465369	(lspA) signal peptidase II [Lsp (VF0351) - Post-translational modification (VFC0315)] [Listeria monocytogenes EGD-e]
CFSAN117537	NODE_2_length_406444_cov_52.419990	104198	105130	-	lpeA	1-933/933	100	96.68	vfdb	NP_465372	(lpeA) lipoprotein promoting cell invasion [LpeA (VF0346) - Invasion (VFC0083)] [Listeria monocytogenes EGD-e]
CFSAN117537	NODE_2_length_406444_cov_52.419990	336021	336998	-	bsh	1-978/978	100	97.75	vfdb	NP_465591	(bsh) bile salt hydrolase [BSH (VF0350) - Stress survival (VFC0282)] [Listeria monocytogenes EGD-e]
CFSAN117537	NODE_4_length_308340_cov_47.336764	82122	83507	+	hpt	1-1386/1386	100	97.76	vfdb	NP_464364	(hpt) hexose phosphate transport protein [Hpt (VF0264) - Nutritional/Metabolic factor (VFC0272)] [Listeria monocytogenes EGD-e]
CFSAN117537	NODE_4_length_308340_cov_47.336764	181484	182479	+	lplA1	1-996/996	100	92.57	vfdb	NP_464456	(lplA1) lipoate protein ligase [LplA1 (VF0347) - Nutritional/Metabolic factor (VFC0272)] [Listeria monocytogenes EGD-e]
CFSAN117537	NODE_4_length_308340_cov_47.336764	240509	242677	-	clpE	1-2175/2175	99.72	93.66	vfdb	NP_464522	(clpE) ATP-dependent protease [ClpE (VF0073) - Stress survival (VFC0282)] [Listeria monocytogenes EGD-e]
CFSAN117537	NODE_5_length_280142_cov_44.786697	69034	69651	-	lntA	1-618/618	100	95.95	vfdb	NP_463967	(lntA) listeria nuclear targeted protein A [LntA (VF0440) - Immune modulation (VFC0258)] [Listeria monocytogenes EGD-e]
CFSAN117537	NODE_5_length_280142_cov_44.786697	71353	73243	-	inlB	1-1891/1893	99.89	92.33	vfdb	NP_463963	(inlB) Internalin B [InlB (VF0070) - Invasion (VFC0083)] [Listeria monocytogenes EGD-e]
CFSAN117537	NODE_5_length_280142_cov_44.786697	73328	75730	-	inlA	1-2403/2403	100	96.75	vfdb	NP_463962	(inlA) Internalin A [InlA (VF0069) - Invasion (VFC0083)] [Listeria monocytogenes EGD-e]
CFSAN117537	NODE_5_length_280142_cov_44.786697	106034	107428	-	pdgA	1-1401/1401	99.57	96.57	vfdb	NP_463944	(pdgA) Peptidoglycan N-deacetylase [PgdA (VF0442) - Immune modulation (VFC0258)] [Listeria monocytogenes EGD-e]
CFSAN117537	NODE_5_length_280142_cov_44.786697	112814	115285	-	inlF	1-2466/2466	99.96	80.95	vfdb	NP_463939	(inlF) internalin F [InlF (VF0447) - Adherence (VFC0001)] [Listeria monocytogenes EGD-e]
CFSAN117537	NODE_5_length_280142_cov_44.786697	205246	206502	+	vip	1-1200/1200	100	85.36	vfdb	NP_463850	(vip) surface adhesin Vip [Vip (VF0443) - Invasion (VFC0083)] [Listeria monocytogenes EGD-e]
CFSAN117537	NODE_6_length_225306_cov_47.560461	157652	159079	+	iap/cwhA	1-1449/1449	98.34	95.45	vfdb	NP_464110	(iap/cwhA) P60 extracellular protein invasion associated protein Iap [P60 (VF0068) - Invasion (VFC0083)] [Listeria monocytogenes EGD-e]
CFSAN117537	NODE_7_length_221719_cov_46.066974	124228	125109	-	prsA2	1-882/882	100	96.37	vfdb	NP_465743	(prsA2) post translocation chaperone PrsA2 [PrsA2 (VF0449) - Post-translational modification (VFC0315)] [Listeria monocytogenes EGD-e]
CFSAN117537	NODE_7_length_221719_cov_46.066974	157190	157816	+	hbp1/svpA	1-624/624	100	90.27	vfdb	NP_465710	(hbp1/svpA) Haemoglobin binding protein 1 [SvpA (VF0263) - Nutritional/Metabolic factor (VFC0272)] [Listeria monocytogenes EGD-e]
CFSAN117537	NODE_7_length_221719_cov_46.066974	157829	159538	+	hbp2	1-1710/1710	100	93.45	vfdb	NP_465709	(hbp2) hypothetical protein [SvpA (VF0263) - Nutritional/Metabolic factor (VFC0272)] [Listeria monocytogenes EGD-e]
CFSAN117537	NODE_8_length_172493_cov_54.606042	70712	71149	+	gtcA	1-438/438	99.54	80.45	vfdb	NP_466072	(gtcA) wall teichoic acid glycosylation protein GtcA [GtcA (VF0607) - Post-translational modification (VFC0315)] [Listeria monocytogenes EGD-e]
CFSAN117537	NODE_8_length_172493_cov_54.606042	150699	151865	-	inlP	1-1167/1167	100	95.29	vfdb	NP_465993	(inlP) internalin P [InlP (VF0577) - Adherence (VFC0001)] [Listeria monocytogenes EGD-e]
CFSAN117537	NODE_8_length_172493_cov_54.606042	153523	154119	-	clpP	1-597/597	100	96.82	vfdb	NP_465991	(clpP) ATP-dependent Clp protease proteolytic subunit [ClpP (VF0074) - Stress survival (VFC0282)] [Listeria monocytogenes EGD-e]
CFSAN117541	NODE_10_length_100768_cov_30.851571	1530	2126	-	clpP	1-597/597	100	100	vfdb	NP_465991	(clpP) ATP-dependent Clp protease proteolytic subunit [ClpP (VF0074) - Stress survival (VFC0282)] [Listeria monocytogenes EGD-e]
CFSAN117541	NODE_12_length_91101_cov_26.017840	13090	15555	+	inlF	1-2466/2466	100	100	vfdb	NP_463939	(inlF) internalin F [InlF (VF0447) - Adherence (VFC0001)] [Listeria monocytogenes EGD-e]
CFSAN117541	NODE_12_length_91101_cov_26.017840	20943	22343	+	pdgA	1-1401/1401	100	100	vfdb	NP_463944	(pdgA) Peptidoglycan N-deacetylase [PgdA (VF0442) - Immune modulation (VFC0258)] [Listeria monocytogenes EGD-e]
CFSAN117541	NODE_12_length_91101_cov_26.017840	37995	40397	+	inlA	1-2403/2403	100	100	vfdb	NP_463962	(inlA) Internalin A [InlA (VF0069) - Invasion (VFC0083)] [Listeria monocytogenes EGD-e]
CFSAN117541	NODE_12_length_91101_cov_26.017840	40482	42374	+	inlB	1-1893/1893	100	100	vfdb	NP_463963	(inlB) Internalin B [InlB (VF0070) - Invasion (VFC0083)] [Listeria monocytogenes EGD-e]
CFSAN117541	NODE_12_length_91101_cov_26.017840	50979	51596	+	lntA	1-618/618	100	99.68	vfdb	NP_463967	(lntA) listeria nuclear targeted protein A [LntA (VF0440) - Immune modulation (VFC0258)] [Listeria monocytogenes EGD-e]
CFSAN117541	NODE_13_length_88363_cov_30.969559	2304	4766	+	clpC	1-2463/2463	100	100	vfdb	NP_463763	(clpC) endopeptidase Clp ATP-binding chain C [ClpC (VF0072) - Stress survival (VFC0282)] [Listeria monocytogenes EGD-e]
CFSAN117541	NODE_18_length_69677_cov_26.160187	55645	57354	-	hbp2	1-1710/1710	100	100	vfdb	NP_465709	(hbp2) hypothetical protein [SvpA (VF0263) - Nutritional/Metabolic factor (VFC0272)] [Listeria monocytogenes EGD-e]
CFSAN117541	NODE_18_length_69677_cov_26.160187	57369	57992	-	hbp1/svpA	1-624/624	100	100	vfdb	NP_465710	(hbp1/svpA) Haemoglobin binding protein 1 [SvpA (VF0263) - Nutritional/Metabolic factor (VFC0272)] [Listeria monocytogenes EGD-e]
CFSAN117541	NODE_19_length_64254_cov_31.621626	30489	31202	-	prfA	1-714/714	100	100	vfdb	NP_463731	(prfA) listeriolysin positive regulatory protein [PrfA (VF0062) - Regulation (VFC0301)] [Listeria monocytogenes EGD-e]
CFSAN117541	NODE_19_length_64254_cov_31.621626	31473	32426	-	plcA	1-954/954	100	100	vfdb	NP_463732	(plcA) phosphatidylinositol-specific phospholipase c [PlcA (VF0063) - Exotoxin (VFC0235)] [Listeria monocytogenes EGD-e]
CFSAN117541	NODE_19_length_64254_cov_31.621626	32668	34257	+	hly	1-1590/1590	100	100	vfdb	NP_463733	(hly) listeriolysin O precursor [LLO (VF0064) - Exotoxin (VFC0235)] [Listeria monocytogenes EGD-e]
CFSAN117541	NODE_19_length_64254_cov_31.621626	34588	36120	+	mpl	1-1533/1533	100	99.94	vfdb	NP_463734	(mpl) Zinc metalloproteinase precursor [Mpl (VF0065) - Exoenzyme (VFC0251)] [Listeria monocytogenes EGD-e]
CFSAN117541	NODE_19_length_64254_cov_31.621626	36319	38238	+	actA	1-1920/1920	100	100	vfdb	NP_463735	(actA) actin-assembly inducing protein precursor [ActA (VF0066) - Motility (VFC0204)] [Listeria monocytogenes EGD-e]
CFSAN117541	NODE_19_length_64254_cov_31.621626	38274	39143	+	plcB	1-870/870	100	100	vfdb	NP_463736	(plcB) phospholipase C [PlcB (VF0067) - Exotoxin (VFC0235)] [Listeria monocytogenes EGD-e]
CFSAN117541	NODE_1_length_359420_cov_30.795521	6793	7683	-	inlC	1-891/891	100	100	vfdb	NP_465311	(inlC) internalin C [InlC (VF0438) - Immune modulation (VFC0258)] [Listeria monocytogenes EGD-e]
CFSAN117541	NODE_1_length_359420_cov_30.795521	50715	52427	+	fbpA	1-1713/1713	100	99.88	vfdb	NP_465354	(fbpA) fibronectin-binding protein [FbpA (VF0349) - Adherence (VFC0001)] [Listeria monocytogenes EGD-e]
CFSAN117541	NODE_1_length_359420_cov_30.795521	66999	67463	-	lspA	1-465/465	100	100	vfdb	NP_465369	(lspA) signal peptidase II [Lsp (VF0351) - Post-translational modification (VFC0315)] [Listeria monocytogenes EGD-e]
CFSAN117541	NODE_1_length_359420_cov_30.795521	70388	71320	-	lpeA	1-933/933	100	99.89	vfdb	NP_465372	(lpeA) lipoprotein promoting cell invasion [LpeA (VF0346) - Invasion (VFC0083)] [Listeria monocytogenes EGD-e]
CFSAN117541	NODE_1_length_359420_cov_30.795521	293013	293990	-	bsh	1-978/978	100	100	vfdb	NP_465591	(bsh) bile salt hydrolase [BSH (VF0350) - Stress survival (VFC0282)] [Listeria monocytogenes EGD-e]
CFSAN117541	NODE_22_length_55497_cov_21.121510	27497	29214	+	aut	1-1719/1719	99.94	99.83	vfdb	NP_464601	(aut) autolysin [Auto (VF0348) - Invasion (VFC0083)] [Listeria monocytogenes EGD-e]
CFSAN117541	NODE_27_length_33443_cov_33.434806	9021	14156	-	lapB	1-5136/5136	100	98.87	vfdb	NP_465191	(lapB) Listeria adhesion protein LapB [LapB (VF0446) - Adherence (VFC0001)] [Listeria monocytogenes EGD-e]
CFSAN117541	NODE_2_length_221944_cov_26.996326	49425	51599	+	clpE	1-2175/2175	100	100	vfdb	NP_464522	(clpE) ATP-dependent protease [ClpE (VF0073) - Stress survival (VFC0282)] [Listeria monocytogenes EGD-e]
CFSAN117541	NODE_2_length_221944_cov_26.996326	108693	109688	-	lplA1	1-996/996	100	100	vfdb	NP_464456	(lplA1) lipoate protein ligase [LplA1 (VF0347) - Nutritional/Metabolic factor (VFC0272)] [Listeria monocytogenes EGD-e]
CFSAN117541	NODE_2_length_221944_cov_26.996326	206962	208347	-	hpt	1-1386/1386	100	97.83	vfdb	NP_464364	(hpt) hexose phosphate transport protein [Hpt (VF0264) - Nutritional/Metabolic factor (VFC0272)] [Listeria monocytogenes EGD-e]
CFSAN117541	NODE_3_length_216693_cov_30.772457	102623	105178	+	inlJ	1-2556/2556	100	100	vfdb	NP_466343	(inlJ) internalin J [InlJ (VF0445) - Adherence (VFC0001)] [Listeria monocytogenes EGD-e]
CFSAN117541	NODE_4_length_182322_cov_27.014984	28160	30760	-	lap	1-2601/2601	100	100	vfdb	NP_465159	(lap) Listeria adhesion protein Lap [Lap (VF0444) - Adherence (VFC0001)] [Listeria monocytogenes EGD-e]
CFSAN117541	NODE_5_length_128950_cov_31.752327	115	1281	+	inlP	1-1167/1167	100	99.14	vfdb	NP_465993	(inlP) internalin P [InlP (VF0577) - Adherence (VFC0001)] [Listeria monocytogenes EGD-e]
CFSAN117541	NODE_5_length_128950_cov_31.752327	80829	81266	-	gtcA	1-438/438	100	100	vfdb	NP_466072	(gtcA) wall teichoic acid glycosylation protein GtcA [GtcA (VF0607) - Post-translational modification (VFC0315)] [Listeria monocytogenes EGD-e]
CFSAN117541	NODE_5_length_128950_cov_31.752327	91016	93769	+	ami	1-2754/2754	100	99.27	vfdb	NP_466081	(ami) autolysin amidase adhesin [Ami (VF0071) - Adherence (VFC0001)] [Listeria monocytogenes EGD-e]
CFSAN117541	NODE_6_length_128040_cov_26.815617	1616	3412	+	inlK	1-1797/1797	100	100	vfdb	NP_464815	(inlK) internalin K [InlK (VF0439) - Immune modulation (VFC0258)] [Listeria monocytogenes EGD-e]
CFSAN117541	NODE_6_length_128040_cov_26.815617	3446	5314	-	oatA	1-1869/1869	100	99.57	vfdb	NP_464816	(oatA) peptidoglycan O-acetyltransferase [OatA (VF0441) - Immune modulation (VFC0258)] [Listeria monocytogenes EGD-e]
CFSAN117541	NODE_7_length_126085_cov_25.983058	90556	91998	+	iap/cwhA	1-1449/1449	99.59	99.59	vfdb	NP_464110	(iap/cwhA) P60 extracellular protein invasion associated protein Iap [P60 (VF0068) - Invasion (VFC0083)] [Listeria monocytogenes EGD-e]
CFSAN117541	NODE_9_length_110322_cov_28.595490	20249	21130	+	prsA2	1-882/882	100	100	vfdb	NP_465743	(prsA2) post translocation chaperone PrsA2 [PrsA2 (VF0449) - Post-translational modification (VFC0315)] [Listeria monocytogenes EGD-e]
CFSAN117542	NODE_17_length_16856_cov_35.261821	9539	10429	+	inlC	1-891/891	100	97.19	vfdb	NP_465311	(inlC) internalin C [InlC (VF0438) - Immune modulation (VFC0258)] [Listeria monocytogenes EGD-e]
CFSAN117542	NODE_1_length_506337_cov_39.469125	33471	35183	+	fbpA	1-1713/1713	100	91.71	vfdb	NP_465354	(fbpA) fibronectin-binding protein [FbpA (VF0349) - Adherence (VFC0001)] [Listeria monocytogenes EGD-e]
CFSAN117542	NODE_1_length_506337_cov_39.469125	49754	50218	-	lspA	1-465/465	100	97.42	vfdb	NP_465369	(lspA) signal peptidase II [Lsp (VF0351) - Post-translational modification (VFC0315)] [Listeria monocytogenes EGD-e]
CFSAN117542	NODE_1_length_506337_cov_39.469125	53143	54075	-	lpeA	1-933/933	100	96.68	vfdb	NP_465372	(lpeA) lipoprotein promoting cell invasion [LpeA (VF0346) - Invasion (VFC0083)] [Listeria monocytogenes EGD-e]
CFSAN117542	NODE_1_length_506337_cov_39.469125	285044	286021	-	bsh	1-978/978	100	97.75	vfdb	NP_465591	(bsh) bile salt hydrolase [BSH (VF0350) - Stress survival (VFC0282)] [Listeria monocytogenes EGD-e]
CFSAN117542	NODE_1_length_506337_cov_39.469125	417577	419286	-	hbp2	1-1710/1710	100	93.45	vfdb	NP_465709	(hbp2) hypothetical protein [SvpA (VF0263) - Nutritional/Metabolic factor (VFC0272)] [Listeria monocytogenes EGD-e]
CFSAN117542	NODE_1_length_506337_cov_39.469125	419299	419925	-	hbp1/svpA	1-624/624	100	90.27	vfdb	NP_465710	(hbp1/svpA) Haemoglobin binding protein 1 [SvpA (VF0263) - Nutritional/Metabolic factor (VFC0272)] [Listeria monocytogenes EGD-e]
CFSAN117542	NODE_1_length_506337_cov_39.469125	452006	452887	+	prsA2	1-882/882	100	96.37	vfdb	NP_465743	(prsA2) post translocation chaperone PrsA2 [PrsA2 (VF0449) - Post-translational modification (VFC0315)] [Listeria monocytogenes EGD-e]
CFSAN117542	NODE_2_length_476570_cov_36.960073	49624	51444	+	inlK	1-1797/1797	100	89.18	vfdb	NP_464815	(inlK) internalin K [InlK (VF0439) - Immune modulation (VFC0258)] [Listeria monocytogenes EGD-e]
CFSAN117542	NODE_2_length_476570_cov_36.960073	51477	53363	-	oatA	1-1869/1869	100	93.48	vfdb	NP_464816	(oatA) peptidoglycan O-acetyltransferase [OatA (VF0441) - Immune modulation (VFC0258)] [Listeria monocytogenes EGD-e]
CFSAN117542	NODE_2_length_476570_cov_36.960073	408992	411592	+	lap	1-2601/2601	100	96.85	vfdb	NP_465159	(lap) Listeria adhesion protein Lap [Lap (VF0444) - Adherence (VFC0001)] [Listeria monocytogenes EGD-e]
CFSAN117542	NODE_2_length_476570_cov_36.960073	451449	456605	-	lapB	1-5136/5136	100	93.08	vfdb	NP_465191	(lapB) Listeria adhesion protein LapB [LapB (VF0446) - Adherence (VFC0001)] [Listeria monocytogenes EGD-e]
CFSAN117542	NODE_4_length_321562_cov_38.408316	2432	4894	+	clpC	1-2463/2463	100	94.15	vfdb	NP_463763	(clpC) endopeptidase Clp ATP-binding chain C [ClpC (VF0072) - Stress survival (VFC0282)] [Listeria monocytogenes EGD-e]
CFSAN117542	NODE_4_length_321562_cov_38.408316	115055	116311	-	vip	1-1200/1200	100	85.36	vfdb	NP_463850	(vip) surface adhesin Vip [Vip (VF0443) - Invasion (VFC0083)] [Listeria monocytogenes EGD-e]
CFSAN117542	NODE_4_length_321562_cov_38.408316	206272	208743	+	inlF	1-2466/2466	99.96	80.95	vfdb	NP_463939	(inlF) internalin F [InlF (VF0447) - Adherence (VFC0001)] [Listeria monocytogenes EGD-e]
CFSAN117542	NODE_4_length_321562_cov_38.408316	214129	215529	+	pdgA	1-1401/1401	100	97	vfdb	NP_463944	(pdgA) Peptidoglycan N-deacetylase [PgdA (VF0442) - Immune modulation (VFC0258)] [Listeria monocytogenes EGD-e]
CFSAN117542	NODE_4_length_321562_cov_38.408316	245833	248235	+	inlA	1-2403/2403	100	96.75	vfdb	NP_463962	(inlA) Internalin A [InlA (VF0069) - Invasion (VFC0083)] [Listeria monocytogenes EGD-e]
CFSAN117542	NODE_4_length_321562_cov_38.408316	248320	250210	+	inlB	1-1891/1893	99.89	92.28	vfdb	NP_463963	(inlB) Internalin B [InlB (VF0070) - Invasion (VFC0083)] [Listeria monocytogenes EGD-e]
CFSAN117542	NODE_4_length_321562_cov_38.408316	251912	252529	+	lntA	1-618/618	100	95.95	vfdb	NP_463967	(lntA) listeria nuclear targeted protein A [LntA (VF0440) - Immune modulation (VFC0258)] [Listeria monocytogenes EGD-e]
CFSAN117542	NODE_5_length_308339_cov_37.077009	65662	67830	+	clpE	1-2175/2175	99.72	93.66	vfdb	NP_464522	(clpE) ATP-dependent protease [ClpE (VF0073) - Stress survival (VFC0282)] [Listeria monocytogenes EGD-e]
CFSAN117542	NODE_5_length_308339_cov_37.077009	125860	126855	-	lplA1	1-996/996	100	92.57	vfdb	NP_464456	(lplA1) lipoate protein ligase [LplA1 (VF0347) - Nutritional/Metabolic factor (VFC0272)] [Listeria monocytogenes EGD-e]
CFSAN117542	NODE_5_length_308339_cov_37.077009	224832	226217	-	hpt	1-1386/1386	100	97.76	vfdb	NP_464364	(hpt) hexose phosphate transport protein [Hpt (VF0264) - Nutritional/Metabolic factor (VFC0272)] [Listeria monocytogenes EGD-e]
CFSAN117542	NODE_6_length_225253_cov_37.605381	157652	159079	+	iap/cwhA	1-1449/1449	98.34	95.45	vfdb	NP_464110	(iap/cwhA) P60 extracellular protein invasion associated protein Iap [P60 (VF0068) - Invasion (VFC0083)] [Listeria monocytogenes EGD-e]
CFSAN117542	NODE_7_length_143436_cov_43.700849	18375	18971	+	clpP	1-597/597	100	96.82	vfdb	NP_465991	(clpP) ATP-dependent Clp protease proteolytic subunit [ClpP (VF0074) - Stress survival (VFC0282)] [Listeria monocytogenes EGD-e]
CFSAN117542	NODE_7_length_143436_cov_43.700849	20629	21795	+	inlP	1-1167/1167	100	95.29	vfdb	NP_465993	(inlP) internalin P [InlP (VF0577) - Adherence (VFC0001)] [Listeria monocytogenes EGD-e]
CFSAN117542	NODE_7_length_143436_cov_43.700849	101344	101781	-	gtcA	1-438/438	99.54	80.45	vfdb	NP_466072	(gtcA) wall teichoic acid glycosylation protein GtcA [GtcA (VF0607) - Post-translational modification (VFC0315)] [Listeria monocytogenes EGD-e]
CFSAN117542	NODE_9_length_90312_cov_41.418429	25105	25973	-	plcB	2-870/870	99.89	95.63	vfdb	NP_463736	(plcB) phospholipase C [PlcB (VF0067) - Exotoxin (VFC0235)] [Listeria monocytogenes EGD-e]
CFSAN117542	NODE_9_length_90312_cov_41.418429	26012	27929	-	actA	1-1918/1920	99.9	94.21	vfdb	NP_463735	(actA) actin-assembly inducing protein precursor [ActA (VF0066) - Motility (VFC0204)] [Listeria monocytogenes EGD-e]
CFSAN117542	NODE_9_length_90312_cov_41.418429	28129	29661	-	mpl	1-1533/1533	100	94.91	vfdb	NP_463734	(mpl) Zinc metalloproteinase precursor [Mpl (VF0065) - Exoenzyme (VFC0251)] [Listeria monocytogenes EGD-e]
CFSAN117542	NODE_9_length_90312_cov_41.418429	29996	31585	-	hly	1-1590/1590	100	97.36	vfdb	NP_463733	(hly) listeriolysin O precursor [LLO (VF0064) - Exotoxin (VFC0235)] [Listeria monocytogenes EGD-e]
CFSAN117542	NODE_9_length_90312_cov_41.418429	31828	32781	+	plcA	1-954/954	100	97.28	vfdb	NP_463732	(plcA) phosphatidylinositol-specific phospholipase c [PlcA (VF0063) - Exotoxin (VFC0235)] [Listeria monocytogenes EGD-e]
CFSAN117542	NODE_9_length_90312_cov_41.418429	33054	33767	+	prfA	1-714/714	100	97.48	vfdb	NP_463731	(prfA) listeriolysin positive regulatory protein [PrfA (VF0062) - Regulation (VFC0301)] [Listeria monocytogenes EGD-e]
CFSAN117545	NODE_10_length_104586_cov_35.563245	24834	26234	-	pdgA	1-1401/1401	100	97	vfdb	NP_463944	(pdgA) Peptidoglycan N-deacetylase [PgdA (VF0442) - Immune modulation (VFC0258)] [Listeria monocytogenes EGD-e]
CFSAN117545	NODE_10_length_104586_cov_35.563245	31620	34091	-	inlF	1-2466/2466	99.96	80.79	vfdb	NP_463939	(inlF) internalin F [InlF (VF0447) - Adherence (VFC0001)] [Listeria monocytogenes EGD-e]
CFSAN117545	NODE_12_length_87589_cov_40.882257	53918	54631	-	prfA	1-714/714	100	97.62	vfdb	NP_463731	(prfA) listeriolysin positive regulatory protein [PrfA (VF0062) - Regulation (VFC0301)] [Listeria monocytogenes EGD-e]
CFSAN117545	NODE_12_length_87589_cov_40.882257	54904	55857	-	plcA	1-954/954	100	97.38	vfdb	NP_463732	(plcA) phosphatidylinositol-specific phospholipase c [PlcA (VF0063) - Exotoxin (VFC0235)] [Listeria monocytogenes EGD-e]
CFSAN117545	NODE_12_length_87589_cov_40.882257	56100	57689	+	hly	1-1590/1590	100	97.3	vfdb	NP_463733	(hly) listeriolysin O precursor [LLO (VF0064) - Exotoxin (VFC0235)] [Listeria monocytogenes EGD-e]
CFSAN117545	NODE_12_length_87589_cov_40.882257	58020	59552	+	mpl	1-1533/1533	100	94.85	vfdb	NP_463734	(mpl) Zinc metalloproteinase precursor [Mpl (VF0065) - Exoenzyme (VFC0251)] [Listeria monocytogenes EGD-e]
CFSAN117545	NODE_12_length_87589_cov_40.882257	61603	62471	+	plcB	2-870/870	99.89	95.51	vfdb	NP_463736	(plcB) phospholipase C [PlcB (VF0067) - Exotoxin (VFC0235)] [Listeria monocytogenes EGD-e]
CFSAN117545	NODE_14_length_71293_cov_40.521218	40036	41013	-	bsh	1-978/978	100	97.75	vfdb	NP_465591	(bsh) bile salt hydrolase [BSH (VF0350) - Stress survival (VFC0282)] [Listeria monocytogenes EGD-e]
CFSAN117545	NODE_16_length_41287_cov_42.567031	2271	4733	+	clpC	1-2463/2463	100	94.07	vfdb	NP_463763	(clpC) endopeptidase Clp ATP-binding chain C [ClpC (VF0072) - Stress survival (VFC0282)] [Listeria monocytogenes EGD-e]
CFSAN117545	NODE_18_length_32188_cov_29.843891	20137	20754	-	lntA	1-618/618	100	96.12	vfdb	NP_463967	(lntA) listeria nuclear targeted protein A [LntA (VF0440) - Immune modulation (VFC0258)] [Listeria monocytogenes EGD-e]
CFSAN117545	NODE_18_length_32188_cov_29.843891	22456	24346	-	inlB	1-1891/1893	99.89	92.7	vfdb	NP_463963	(inlB) Internalin B [InlB (VF0070) - Invasion (VFC0083)] [Listeria monocytogenes EGD-e]
CFSAN117545	NODE_18_length_32188_cov_29.843891	24431	26833	-	inlA	1-2403/2403	100	96.75	vfdb	NP_463962	(inlA) Internalin A [InlA (VF0069) - Invasion (VFC0083)] [Listeria monocytogenes EGD-e]
CFSAN117545	NODE_20_length_23127_cov_36.574174	15288	16544	+	vip	1-1200/1200	100	85.28	vfdb	NP_463850	(vip) surface adhesin Vip [Vip (VF0443) - Invasion (VFC0083)] [Listeria monocytogenes EGD-e]
CFSAN117545	NODE_2_length_303523_cov_41.458849	235120	237720	+	lap	1-2601/2601	100	97.19	vfdb	NP_465159	(lap) Listeria adhesion protein Lap [Lap (VF0444) - Adherence (VFC0001)] [Listeria monocytogenes EGD-e]
CFSAN117545	NODE_2_length_303523_cov_41.458849	277572	282710	-	lapB	1-5136/5136	100	93.27	vfdb	NP_465191	(lapB) Listeria adhesion protein LapB [LapB (VF0446) - Adherence (VFC0001)] [Listeria monocytogenes EGD-e]
CFSAN117545	NODE_3_length_292356_cov_39.485722	114	431	+	llsX	1-318/318	100	97.17	vfdb	AHK25019	(llsX) LlsX [LLS (VF0410) - Exotoxin (VFC0235)] [Listeria innocua SLCC6294]
CFSAN117545	NODE_3_length_292356_cov_39.485722	428	1303	+	llsB	1-876/876	100	97.37	vfdb	AHK25020	(llsB) SagB family dehydrogenase LlsB [LLS (VF0410) - Exotoxin (VFC0235)] [Listeria innocua SLCC6294]
CFSAN117545	NODE_3_length_292356_cov_39.485722	1311	2228	+	llsY	1-918/918	100	96.19	vfdb	AHK25021	(llsY) LlsY [LLS (VF0410) - Exotoxin (VFC0235)] [Listeria innocua SLCC6294]
CFSAN117545	NODE_3_length_292356_cov_39.485722	2221	3534	+	llsD	1-1314/1314	100	98.1	vfdb	AHK25022	(llsD) streptolysin-associated protein LlsD [LLS (VF0410) - Exotoxin (VFC0235)] [Listeria innocua SLCC6294]
CFSAN117545	NODE_3_length_292356_cov_39.485722	3527	4114	+	llsP	1-588/588	100	93.71	vfdb	AHK25023	(llsP) CAAX amino terminal protease LlsP [LLS (VF0410) - Exotoxin (VFC0235)] [Listeria innocua SLCC6294]
CFSAN117545	NODE_3_length_292356_cov_39.485722	168239	170065	+	inlK	1-1797/1797	100	89	vfdb	NP_464815	(inlK) internalin K [InlK (VF0439) - Immune modulation (VFC0258)] [Listeria monocytogenes EGD-e]
CFSAN117545	NODE_3_length_292356_cov_39.485722	170098	171984	-	oatA	1-1869/1869	100	93.53	vfdb	NP_464816	(oatA) peptidoglycan O-acetyltransferase [OatA (VF0441) - Immune modulation (VFC0258)] [Listeria monocytogenes EGD-e]
CFSAN117545	NODE_4_length_264959_cov_39.725279	128126	129007	-	prsA2	1-882/882	100	96.37	vfdb	NP_465743	(prsA2) post translocation chaperone PrsA2 [PrsA2 (VF0449) - Post-translational modification (VFC0315)] [Listeria monocytogenes EGD-e]
CFSAN117545	NODE_4_length_264959_cov_39.725279	161088	161714	+	hbp1/svpA	1-624/624	100	90.27	vfdb	NP_465710	(hbp1/svpA) Haemoglobin binding protein 1 [SvpA (VF0263) - Nutritional/Metabolic factor (VFC0272)] [Listeria monocytogenes EGD-e]
CFSAN117545	NODE_4_length_264959_cov_39.725279	161727	163436	+	hbp2	1-1710/1710	100	93.51	vfdb	NP_465709	(hbp2) hypothetical protein [SvpA (VF0263) - Nutritional/Metabolic factor (VFC0272)] [Listeria monocytogenes EGD-e]
CFSAN117545	NODE_5_length_255721_cov_42.749579	6429	7319	-	inlC	1-891/891	100	97.19	vfdb	NP_465311	(inlC) internalin C [InlC (VF0438) - Immune modulation (VFC0258)] [Listeria monocytogenes EGD-e]
CFSAN117545	NODE_5_length_255721_cov_42.749579	50085	51797	+	fbpA	1-1713/1713	100	91.65	vfdb	NP_465354	(fbpA) fibronectin-binding protein [FbpA (VF0349) - Adherence (VFC0001)] [Listeria monocytogenes EGD-e]
CFSAN117545	NODE_5_length_255721_cov_42.749579	66367	66831	-	lspA	1-465/465	100	97.42	vfdb	NP_465369	(lspA) signal peptidase II [Lsp (VF0351) - Post-translational modification (VFC0315)] [Listeria monocytogenes EGD-e]
CFSAN117545	NODE_5_length_255721_cov_42.749579	69756	70688	-	lpeA	1-933/933	100	96.78	vfdb	NP_465372	(lpeA) lipoprotein promoting cell invasion [LpeA (VF0346) - Invasion (VFC0083)] [Listeria monocytogenes EGD-e]
CFSAN117545	NODE_6_length_225245_cov_40.863298	100403	100999	+	clpP	1-597/597	100	96.82	vfdb	NP_465991	(clpP) ATP-dependent Clp protease proteolytic subunit [ClpP (VF0074) - Stress survival (VFC0282)] [Listeria monocytogenes EGD-e]
CFSAN117545	NODE_6_length_225245_cov_40.863298	102657	103823	+	inlP	1-1167/1167	100	95.2	vfdb	NP_465993	(inlP) internalin P [InlP (VF0577) - Adherence (VFC0001)] [Listeria monocytogenes EGD-e]
CFSAN117545	NODE_6_length_225245_cov_40.863298	183371	183808	-	gtcA	1-438/438	99.54	80.45	vfdb	NP_466072	(gtcA) wall teichoic acid glycosylation protein GtcA [GtcA (VF0607) - Post-translational modification (VFC0315)] [Listeria monocytogenes EGD-e]
CFSAN117545	NODE_7_length_217777_cov_36.716595	163054	164439	+	hpt	1-1386/1386	100	97.62	vfdb	NP_464364	(hpt) hexose phosphate transport protein [Hpt (VF0264) - Nutritional/Metabolic factor (VFC0272)] [Listeria monocytogenes EGD-e]
CFSAN117545	NODE_8_length_207865_cov_36.483551	47931	48926	+	lplA1	1-996/996	100	92.77	vfdb	NP_464456	(lplA1) lipoate protein ligase [LplA1 (VF0347) - Nutritional/Metabolic factor (VFC0272)] [Listeria monocytogenes EGD-e]
CFSAN117545	NODE_8_length_207865_cov_36.483551	106960	109128	-	clpE	1-2175/2175	99.72	93.47	vfdb	NP_464522	(clpE) ATP-dependent protease [ClpE (VF0073) - Stress survival (VFC0282)] [Listeria monocytogenes EGD-e]
CFSAN117545	NODE_8_length_207865_cov_36.483551	206155	206304	+	llsA	1-150/150	100	98	vfdb	AHK25016	(llsA) listeriolysin S [LLS (VF0410) - Exotoxin (VFC0235)] [Listeria innocua SLCC6294]
CFSAN117545	NODE_8_length_207865_cov_36.483551	206369	207256	+	llsG	1-888/888	100	97.3	vfdb	AHK25017	(llsG) ABC transporter ATP-binding protein LlsG [LLS (VF0410) - Exotoxin (VFC0235)] [Listeria innocua SLCC6294]
CFSAN117545	NODE_8_length_207865_cov_36.483551	207256	207865	+	llsH	1-610/750	81.33	97.54	vfdb	AHK25018	(llsH) ABC transporter permease protein LlsH [LLS (VF0410) - Exotoxin (VFC0235)] [Listeria innocua SLCC6294]
CFSAN117545	NODE_9_length_187408_cov_34.418847	78614	80041	+	iap/cwhA	1-1449/1449	98.34	95.25	vfdb	NP_464110	(iap/cwhA) P60 extracellular protein invasion associated protein Iap [P60 (VF0068) - Invasion (VFC0083)] [Listeria monocytogenes EGD-e]
CFSAN117546	NODE_10_length_120846_cov_41.932074	15288	16544	+	vip	1-1200/1200	100	85.28	vfdb	NP_463850	(vip) surface adhesin Vip [Vip (VF0443) - Invasion (VFC0083)] [Listeria monocytogenes EGD-e]
CFSAN117546	NODE_10_length_120846_cov_41.932074	116077	118539	-	clpC	1-2463/2463	100	94.07	vfdb	NP_463763	(clpC) endopeptidase Clp ATP-binding chain C [ClpC (VF0072) - Stress survival (VFC0282)] [Listeria monocytogenes EGD-e]
CFSAN117546	NODE_12_length_85238_cov_48.719554	25070	25938	-	plcB	2-870/870	99.89	95.51	vfdb	NP_463736	(plcB) phospholipase C [PlcB (VF0067) - Exotoxin (VFC0235)] [Listeria monocytogenes EGD-e]
CFSAN117546	NODE_12_length_85238_cov_48.719554	27989	29521	-	mpl	1-1533/1533	100	94.85	vfdb	NP_463734	(mpl) Zinc metalloproteinase precursor [Mpl (VF0065) - Exoenzyme (VFC0251)] [Listeria monocytogenes EGD-e]
CFSAN117546	NODE_12_length_85238_cov_48.719554	29852	31441	-	hly	1-1590/1590	100	97.3	vfdb	NP_463733	(hly) listeriolysin O precursor [LLO (VF0064) - Exotoxin (VFC0235)] [Listeria monocytogenes EGD-e]
CFSAN117546	NODE_12_length_85238_cov_48.719554	31684	32637	+	plcA	1-954/954	100	97.38	vfdb	NP_463732	(plcA) phosphatidylinositol-specific phospholipase c [PlcA (VF0063) - Exotoxin (VFC0235)] [Listeria monocytogenes EGD-e]
CFSAN117546	NODE_12_length_85238_cov_48.719554	32910	33623	+	prfA	1-714/714	100	97.62	vfdb	NP_463731	(prfA) listeriolysin positive regulatory protein [PrfA (VF0062) - Regulation (VFC0301)] [Listeria monocytogenes EGD-e]
CFSAN117546	NODE_14_length_68421_cov_47.614578	37164	38141	-	bsh	1-978/978	100	97.75	vfdb	NP_465591	(bsh) bile salt hydrolase [BSH (VF0350) - Stress survival (VFC0282)] [Listeria monocytogenes EGD-e]
CFSAN117546	NODE_1_length_477600_cov_47.079979	20814	25952	+	lapB	1-5136/5136	100	93.27	vfdb	NP_465191	(lapB) Listeria adhesion protein LapB [LapB (VF0446) - Adherence (VFC0001)] [Listeria monocytogenes EGD-e]
CFSAN117546	NODE_1_length_477600_cov_47.079979	65804	68404	-	lap	1-2601/2601	100	97.19	vfdb	NP_465159	(lap) Listeria adhesion protein Lap [Lap (VF0444) - Adherence (VFC0001)] [Listeria monocytogenes EGD-e]
CFSAN117546	NODE_1_length_477600_cov_47.079979	424041	425927	+	oatA	1-1869/1869	100	93.53	vfdb	NP_464816	(oatA) peptidoglycan O-acetyltransferase [OatA (VF0441) - Immune modulation (VFC0258)] [Listeria monocytogenes EGD-e]
CFSAN117546	NODE_1_length_477600_cov_47.079979	425960	427786	-	inlK	1-1797/1797	100	89	vfdb	NP_464815	(inlK) internalin K [InlK (VF0439) - Immune modulation (VFC0258)] [Listeria monocytogenes EGD-e]
CFSAN117546	NODE_3_length_326641_cov_43.904436	114296	114883	-	llsP	1-588/588	100	93.71	vfdb	AHK25023	(llsP) CAAX amino terminal protease LlsP [LLS (VF0410) - Exotoxin (VFC0235)] [Listeria innocua SLCC6294]
CFSAN117546	NODE_3_length_326641_cov_43.904436	114876	116189	-	llsD	1-1314/1314	100	98.1	vfdb	AHK25022	(llsD) streptolysin-associated protein LlsD [LLS (VF0410) - Exotoxin (VFC0235)] [Listeria innocua SLCC6294]
CFSAN117546	NODE_3_length_326641_cov_43.904436	116182	117099	-	llsY	1-918/918	100	96.19	vfdb	AHK25021	(llsY) LlsY [LLS (VF0410) - Exotoxin (VFC0235)] [Listeria innocua SLCC6294]
CFSAN117546	NODE_3_length_326641_cov_43.904436	117107	117982	-	llsB	1-876/876	100	97.37	vfdb	AHK25020	(llsB) SagB family dehydrogenase LlsB [LLS (VF0410) - Exotoxin (VFC0235)] [Listeria innocua SLCC6294]
CFSAN117546	NODE_3_length_326641_cov_43.904436	117979	118296	-	llsX	1-318/318	100	97.17	vfdb	AHK25019	(llsX) LlsX [LLS (VF0410) - Exotoxin (VFC0235)] [Listeria innocua SLCC6294]
CFSAN117546	NODE_3_length_326641_cov_43.904436	118337	119086	-	llsH	1-750/750	100	97.47	vfdb	AHK25018	(llsH) ABC transporter permease protein LlsH [LLS (VF0410) - Exotoxin (VFC0235)] [Listeria innocua SLCC6294]
CFSAN117546	NODE_3_length_326641_cov_43.904436	119086	119973	-	llsG	1-888/888	100	97.3	vfdb	AHK25017	(llsG) ABC transporter ATP-binding protein LlsG [LLS (VF0410) - Exotoxin (VFC0235)] [Listeria innocua SLCC6294]
CFSAN117546	NODE_3_length_326641_cov_43.904436	120038	120187	-	llsA	1-150/150	100	98	vfdb	AHK25016	(llsA) listeriolysin S [LLS (VF0410) - Exotoxin (VFC0235)] [Listeria innocua SLCC6294]
CFSAN117546	NODE_3_length_326641_cov_43.904436	217214	219382	+	clpE	1-2175/2175	99.72	93.47	vfdb	NP_464522	(clpE) ATP-dependent protease [ClpE (VF0073) - Stress survival (VFC0282)] [Listeria monocytogenes EGD-e]
CFSAN117546	NODE_3_length_326641_cov_43.904436	277416	278411	-	lplA1	1-996/996	100	92.77	vfdb	NP_464456	(lplA1) lipoate protein ligase [LplA1 (VF0347) - Nutritional/Metabolic factor (VFC0272)] [Listeria monocytogenes EGD-e]
CFSAN117546	NODE_4_length_264959_cov_44.359934	128126	129007	-	prsA2	1-882/882	100	96.37	vfdb	NP_465743	(prsA2) post translocation chaperone PrsA2 [PrsA2 (VF0449) - Post-translational modification (VFC0315)] [Listeria monocytogenes EGD-e]
CFSAN117546	NODE_4_length_264959_cov_44.359934	161088	161714	+	hbp1/svpA	1-624/624	100	90.27	vfdb	NP_465710	(hbp1/svpA) Haemoglobin binding protein 1 [SvpA (VF0263) - Nutritional/Metabolic factor (VFC0272)] [Listeria monocytogenes EGD-e]
CFSAN117546	NODE_4_length_264959_cov_44.359934	161727	163436	+	hbp2	1-1710/1710	100	93.51	vfdb	NP_465709	(hbp2) hypothetical protein [SvpA (VF0263) - Nutritional/Metabolic factor (VFC0272)] [Listeria monocytogenes EGD-e]
CFSAN117546	NODE_5_length_264370_cov_49.293230	193683	194615	+	lpeA	1-933/933	100	96.78	vfdb	NP_465372	(lpeA) lipoprotein promoting cell invasion [LpeA (VF0346) - Invasion (VFC0083)] [Listeria monocytogenes EGD-e]
CFSAN117546	NODE_5_length_264370_cov_49.293230	197540	198004	+	lspA	1-465/465	100	97.42	vfdb	NP_465369	(lspA) signal peptidase II [Lsp (VF0351) - Post-translational modification (VFC0315)] [Listeria monocytogenes EGD-e]
CFSAN117546	NODE_5_length_264370_cov_49.293230	212574	214286	-	fbpA	1-1713/1713	100	91.65	vfdb	NP_465354	(fbpA) fibronectin-binding protein [FbpA (VF0349) - Adherence (VFC0001)] [Listeria monocytogenes EGD-e]
CFSAN117546	NODE_5_length_264370_cov_49.293230	257052	257942	+	inlC	1-891/891	100	97.19	vfdb	NP_465311	(inlC) internalin C [InlC (VF0438) - Immune modulation (VFC0258)] [Listeria monocytogenes EGD-e]
CFSAN117546	NODE_6_length_242503_cov_40.797699	152958	154385	+	iap/cwhA	1-1449/1449	98.34	95.25	vfdb	NP_464110	(iap/cwhA) P60 extracellular protein invasion associated protein Iap [P60 (VF0068) - Invasion (VFC0083)] [Listeria monocytogenes EGD-e]
CFSAN117546	NODE_7_length_202768_cov_47.960753	41438	41875	+	gtcA	1-438/438	99.54	80.45	vfdb	NP_466072	(gtcA) wall teichoic acid glycosylation protein GtcA [GtcA (VF0607) - Post-translational modification (VFC0315)] [Listeria monocytogenes EGD-e]
CFSAN117546	NODE_7_length_202768_cov_47.960753	121423	122589	-	inlP	1-1167/1167	100	95.2	vfdb	NP_465993	(inlP) internalin P [InlP (VF0577) - Adherence (VFC0001)] [Listeria monocytogenes EGD-e]
CFSAN117546	NODE_7_length_202768_cov_47.960753	124247	124843	-	clpP	1-597/597	100	96.82	vfdb	NP_465991	(clpP) ATP-dependent Clp protease proteolytic subunit [ClpP (VF0074) - Stress survival (VFC0282)] [Listeria monocytogenes EGD-e]
CFSAN117546	NODE_8_length_177103_cov_41.627577	86535	87920	-	hpt	1-1386/1386	100	97.62	vfdb	NP_464364	(hpt) hexose phosphate transport protein [Hpt (VF0264) - Nutritional/Metabolic factor (VFC0272)] [Listeria monocytogenes EGD-e]
CFSAN117546	NODE_9_length_162991_cov_39.237855	46239	46856	-	lntA	1-618/618	100	96.12	vfdb	NP_463967	(lntA) listeria nuclear targeted protein A [LntA (VF0440) - Immune modulation (VFC0258)] [Listeria monocytogenes EGD-e]
CFSAN117546	NODE_9_length_162991_cov_39.237855	48558	50448	-	inlB	1-1891/1893	99.89	92.7	vfdb	NP_463963	(inlB) Internalin B [InlB (VF0070) - Invasion (VFC0083)] [Listeria monocytogenes EGD-e]
CFSAN117546	NODE_9_length_162991_cov_39.237855	50533	52935	-	inlA	1-2403/2403	100	96.75	vfdb	NP_463962	(inlA) Internalin A [InlA (VF0069) - Invasion (VFC0083)] [Listeria monocytogenes EGD-e]
CFSAN117546	NODE_9_length_162991_cov_39.237855	83239	84639	-	pdgA	1-1401/1401	100	97	vfdb	NP_463944	(pdgA) Peptidoglycan N-deacetylase [PgdA (VF0442) - Immune modulation (VFC0258)] [Listeria monocytogenes EGD-e]
CFSAN117546	NODE_9_length_162991_cov_39.237855	90025	92496	-	inlF	1-2466/2466	99.96	80.79	vfdb	NP_463939	(inlF) internalin F [InlF (VF0447) - Adherence (VFC0001)] [Listeria monocytogenes EGD-e]
CFSAN117555	NODE_13_length_64254_cov_24.314407	25112	25981	-	plcB	1-870/870	100	100	vfdb	NP_463736	(plcB) phospholipase C [PlcB (VF0067) - Exotoxin (VFC0235)] [Listeria monocytogenes EGD-e]
CFSAN117555	NODE_13_length_64254_cov_24.314407	26017	27936	-	actA	1-1920/1920	100	100	vfdb	NP_463735	(actA) actin-assembly inducing protein precursor [ActA (VF0066) - Motility (VFC0204)] [Listeria monocytogenes EGD-e]
CFSAN117555	NODE_13_length_64254_cov_24.314407	28135	29667	-	mpl	1-1533/1533	100	99.94	vfdb	NP_463734	(mpl) Zinc metalloproteinase precursor [Mpl (VF0065) - Exoenzyme (VFC0251)] [Listeria monocytogenes EGD-e]
CFSAN117555	NODE_13_length_64254_cov_24.314407	29998	31587	-	hly	1-1590/1590	100	100	vfdb	NP_463733	(hly) listeriolysin O precursor [LLO (VF0064) - Exotoxin (VFC0235)] [Listeria monocytogenes EGD-e]
CFSAN117555	NODE_13_length_64254_cov_24.314407	31829	32782	+	plcA	1-954/954	100	100	vfdb	NP_463732	(plcA) phosphatidylinositol-specific phospholipase c [PlcA (VF0063) - Exotoxin (VFC0235)] [Listeria monocytogenes EGD-e]
CFSAN117555	NODE_13_length_64254_cov_24.314407	33053	33766	+	prfA	1-714/714	100	100	vfdb	NP_463731	(prfA) listeriolysin positive regulatory protein [PrfA (VF0062) - Regulation (VFC0301)] [Listeria monocytogenes EGD-e]
CFSAN117555	NODE_15_length_37890_cov_22.794985	20691	25826	+	lapB	1-5136/5136	100	98.87	vfdb	NP_465191	(lapB) Listeria adhesion protein LapB [LapB (VF0446) - Adherence (VFC0001)] [Listeria monocytogenes EGD-e]
CFSAN117555	NODE_1_length_546620_cov_24.273057	91065	91946	-	prsA2	1-882/882	100	100	vfdb	NP_465743	(prsA2) post translocation chaperone PrsA2 [PrsA2 (VF0449) - Post-translational modification (VFC0315)] [Listeria monocytogenes EGD-e]
CFSAN117555	NODE_1_length_546620_cov_24.273057	124029	124652	+	hbp1/svpA	1-624/624	100	100	vfdb	NP_465710	(hbp1/svpA) Haemoglobin binding protein 1 [SvpA (VF0263) - Nutritional/Metabolic factor (VFC0272)] [Listeria monocytogenes EGD-e]
CFSAN117555	NODE_1_length_546620_cov_24.273057	124667	126376	+	hbp2	1-1710/1710	100	100	vfdb	NP_465709	(hbp2) hypothetical protein [SvpA (VF0263) - Nutritional/Metabolic factor (VFC0272)] [Listeria monocytogenes EGD-e]
CFSAN117555	NODE_1_length_546620_cov_24.273057	251351	252328	+	bsh	1-978/978	100	100	vfdb	NP_465591	(bsh) bile salt hydrolase [BSH (VF0350) - Stress survival (VFC0282)] [Listeria monocytogenes EGD-e]
CFSAN117555	NODE_1_length_546620_cov_24.273057	474021	474953	+	lpeA	1-933/933	100	100	vfdb	NP_465372	(lpeA) lipoprotein promoting cell invasion [LpeA (VF0346) - Invasion (VFC0083)] [Listeria monocytogenes EGD-e]
CFSAN117555	NODE_1_length_546620_cov_24.273057	477878	478342	+	lspA	1-465/465	100	100	vfdb	NP_465369	(lspA) signal peptidase II [Lsp (VF0351) - Post-translational modification (VFC0315)] [Listeria monocytogenes EGD-e]
CFSAN117555	NODE_1_length_546620_cov_24.273057	492914	494626	-	fbpA	1-1713/1713	100	99.88	vfdb	NP_465354	(fbpA) fibronectin-binding protein [FbpA (VF0349) - Adherence (VFC0001)] [Listeria monocytogenes EGD-e]
CFSAN117555	NODE_1_length_546620_cov_24.273057	537658	538548	+	inlC	1-891/891	100	100	vfdb	NP_465311	(inlC) internalin C [InlC (VF0438) - Immune modulation (VFC0258)] [Listeria monocytogenes EGD-e]
CFSAN117555	NODE_2_length_424702_cov_24.449379	228530	231085	+	inlJ	1-2556/2556	100	100	vfdb	NP_466343	(inlJ) internalin J [InlJ (VF0445) - Adherence (VFC0001)] [Listeria monocytogenes EGD-e]
CFSAN117555	NODE_3_length_280008_cov_20.646929	28777	30494	-	aut	1-1719/1719	99.94	99.83	vfdb	NP_464601	(aut) autolysin [Auto (VF0348) - Invasion (VFC0083)] [Listeria monocytogenes EGD-e]
CFSAN117555	NODE_3_length_280008_cov_20.646929	107490	109664	+	clpE	1-2175/2175	100	100	vfdb	NP_464522	(clpE) ATP-dependent protease [ClpE (VF0073) - Stress survival (VFC0282)] [Listeria monocytogenes EGD-e]
CFSAN117555	NODE_3_length_280008_cov_20.646929	166758	167753	-	lplA1	1-996/996	100	100	vfdb	NP_464456	(lplA1) lipoate protein ligase [LplA1 (VF0347) - Nutritional/Metabolic factor (VFC0272)] [Listeria monocytogenes EGD-e]
CFSAN117555	NODE_3_length_280008_cov_20.646929	265027	266412	-	hpt	1-1386/1386	100	97.83	vfdb	NP_464364	(hpt) hexose phosphate transport protein [Hpt (VF0264) - Nutritional/Metabolic factor (VFC0272)] [Listeria monocytogenes EGD-e]
CFSAN117555	NODE_4_length_259391_cov_20.268622	206654	208522	+	oatA	1-1869/1869	100	99.57	vfdb	NP_464816	(oatA) peptidoglycan O-acetyltransferase [OatA (VF0441) - Immune modulation (VFC0258)] [Listeria monocytogenes EGD-e]
CFSAN117555	NODE_4_length_259391_cov_20.268622	208556	210352	-	inlK	1-1797/1797	100	100	vfdb	NP_464815	(inlK) internalin K [InlK (VF0439) - Immune modulation (VFC0258)] [Listeria monocytogenes EGD-e]
CFSAN117555	NODE_5_length_242303_cov_24.600609	34966	37719	-	ami	1-2754/2754	100	99.27	vfdb	NP_466081	(ami) autolysin amidase adhesin [Ami (VF0071) - Adherence (VFC0001)] [Listeria monocytogenes EGD-e]
CFSAN117555	NODE_5_length_242303_cov_24.600609	47469	47906	+	gtcA	1-438/438	100	100	vfdb	NP_466072	(gtcA) wall teichoic acid glycosylation protein GtcA [GtcA (VF0607) - Post-translational modification (VFC0315)] [Listeria monocytogenes EGD-e]
CFSAN117555	NODE_5_length_242303_cov_24.600609	127454	128620	-	inlP	1-1167/1167	100	99.14	vfdb	NP_465993	(inlP) internalin P [InlP (VF0577) - Adherence (VFC0001)] [Listeria monocytogenes EGD-e]
CFSAN117555	NODE_5_length_242303_cov_24.600609	130275	130871	-	clpP	1-597/597	100	100	vfdb	NP_465991	(clpP) ATP-dependent Clp protease proteolytic subunit [ClpP (VF0074) - Stress survival (VFC0282)] [Listeria monocytogenes EGD-e]
CFSAN117555	NODE_6_length_199764_cov_21.290021	177163	178605	+	iap/cwhA	1-1449/1449	99.59	99.59	vfdb	NP_464110	(iap/cwhA) P60 extracellular protein invasion associated protein Iap [P60 (VF0068) - Invasion (VFC0083)] [Listeria monocytogenes EGD-e]
CFSAN117555	NODE_7_length_181086_cov_21.539802	129491	130108	-	lntA	1-618/618	100	99.68	vfdb	NP_463967	(lntA) listeria nuclear targeted protein A [LntA (VF0440) - Immune modulation (VFC0258)] [Listeria monocytogenes EGD-e]
CFSAN117555	NODE_7_length_181086_cov_21.539802	138713	140605	-	inlB	1-1893/1893	100	100	vfdb	NP_463963	(inlB) Internalin B [InlB (VF0070) - Invasion (VFC0083)] [Listeria monocytogenes EGD-e]
CFSAN117555	NODE_7_length_181086_cov_21.539802	140690	143092	-	inlA	1-2403/2403	100	100	vfdb	NP_463962	(inlA) Internalin A [InlA (VF0069) - Invasion (VFC0083)] [Listeria monocytogenes EGD-e]
CFSAN117555	NODE_7_length_181086_cov_21.539802	158744	160144	-	pdgA	1-1401/1401	100	100	vfdb	NP_463944	(pdgA) Peptidoglycan N-deacetylase [PgdA (VF0442) - Immune modulation (VFC0258)] [Listeria monocytogenes EGD-e]
CFSAN117555	NODE_7_length_181086_cov_21.539802	165532	167997	-	inlF	1-2466/2466	100	100	vfdb	NP_463939	(inlF) internalin F [InlF (VF0447) - Adherence (VFC0001)] [Listeria monocytogenes EGD-e]
CFSAN117555	NODE_8_length_179399_cov_21.032810	25237	27837	-	lap	1-2601/2601	100	100	vfdb	NP_465159	(lap) Listeria adhesion protein Lap [Lap (VF0444) - Adherence (VFC0001)] [Listeria monocytogenes EGD-e]
CFSAN117555	NODE_9_length_167711_cov_22.970045	2304	4766	+	clpC	1-2463/2463	100	100	vfdb	NP_463763	(clpC) endopeptidase Clp ATP-binding chain C [ClpC (VF0072) - Stress survival (VFC0282)] [Listeria monocytogenes EGD-e]
CFSAN117559	NODE_10_length_101921_cov_20.523449	29879	30496	-	lntA	1-618/618	100	91.1	vfdb	NP_463967	(lntA) listeria nuclear targeted protein A [LntA (VF0440) - Immune modulation (VFC0258)] [Listeria monocytogenes EGD-e]
CFSAN117559	NODE_10_length_101921_cov_20.523449	32168	34060	-	inlB	1-1893/1893	100	99.37	vfdb	NP_463963	(inlB) Internalin B [InlB (VF0070) - Invasion (VFC0083)] [Listeria monocytogenes EGD-e]
CFSAN117559	NODE_10_length_101921_cov_20.523449	34145	36547	-	inlA	1-2403/2403	100	99.21	vfdb	NP_463962	(inlA) Internalin A [InlA (VF0069) - Invasion (VFC0083)] [Listeria monocytogenes EGD-e]
CFSAN117559	NODE_10_length_101921_cov_20.523449	52199	53599	-	pdgA	1-1401/1401	100	99.71	vfdb	NP_463944	(pdgA) Peptidoglycan N-deacetylase [PgdA (VF0442) - Immune modulation (VFC0258)] [Listeria monocytogenes EGD-e]
CFSAN117559	NODE_10_length_101921_cov_20.523449	58987	61452	-	inlF	1-2466/2466	100	98.22	vfdb	NP_463939	(inlF) internalin F [InlF (VF0447) - Adherence (VFC0001)] [Listeria monocytogenes EGD-e]
CFSAN117559	NODE_11_length_74872_cov_21.256245	20132	21013	+	prsA2	1-882/882	100	99.89	vfdb	NP_465743	(prsA2) post translocation chaperone PrsA2 [PrsA2 (VF0449) - Post-translational modification (VFC0315)] [Listeria monocytogenes EGD-e]
CFSAN117559	NODE_15_length_59009_cov_23.752352	30478	31198	-	prfA	1-714/714	100	99.03	vfdb	NP_463731	(prfA) listeriolysin positive regulatory protein [PrfA (VF0062) - Regulation (VFC0301)] [Listeria monocytogenes EGD-e]
CFSAN117559	NODE_15_length_59009_cov_23.752352	31469	32422	-	plcA	1-954/954	100	98.32	vfdb	NP_463732	(plcA) phosphatidylinositol-specific phospholipase c [PlcA (VF0063) - Exotoxin (VFC0235)] [Listeria monocytogenes EGD-e]
CFSAN117559	NODE_15_length_59009_cov_23.752352	32664	34253	+	hly	1-1590/1590	100	99.94	vfdb	NP_463733	(hly) listeriolysin O precursor [LLO (VF0064) - Exotoxin (VFC0235)] [Listeria monocytogenes EGD-e]
CFSAN117559	NODE_15_length_59009_cov_23.752352	34584	36116	+	mpl	1-1533/1533	100	99.22	vfdb	NP_463734	(mpl) Zinc metalloproteinase precursor [Mpl (VF0065) - Exoenzyme (VFC0251)] [Listeria monocytogenes EGD-e]
CFSAN117559	NODE_15_length_59009_cov_23.752352	38165	39034	+	plcB	1-870/870	100	99.77	vfdb	NP_463736	(plcB) phospholipase C [PlcB (VF0067) - Exotoxin (VFC0235)] [Listeria monocytogenes EGD-e]
CFSAN117559	NODE_17_length_41263_cov_23.355285	2271	4733	+	clpC	1-2463/2463	100	99.92	vfdb	NP_463763	(clpC) endopeptidase Clp ATP-binding chain C [ClpC (VF0072) - Stress survival (VFC0282)] [Listeria monocytogenes EGD-e]
CFSAN117559	NODE_1_length_442551_cov_19.336123	29194	31794	-	lap	1-2601/2601	100	99.85	vfdb	NP_465159	(lap) Listeria adhesion protein Lap [Lap (VF0444) - Adherence (VFC0001)] [Listeria monocytogenes EGD-e]
CFSAN117559	NODE_1_length_442551_cov_19.336123	389757	391625	+	oatA	1-1869/1869	100	99.89	vfdb	NP_464816	(oatA) peptidoglycan O-acetyltransferase [OatA (VF0441) - Immune modulation (VFC0258)] [Listeria monocytogenes EGD-e]
CFSAN117559	NODE_1_length_442551_cov_19.336123	391659	393455	-	inlK	1-1797/1797	100	98.61	vfdb	NP_464815	(inlK) internalin K [InlK (VF0439) - Immune modulation (VFC0258)] [Listeria monocytogenes EGD-e]
CFSAN117559	NODE_22_length_16829_cov_18.747635	6396	7283	-	inlC	4-891/891	99.66	99.89	vfdb	NP_465311	(inlC) internalin C [InlC (VF0438) - Immune modulation (VFC0258)] [Listeria monocytogenes EGD-e]
CFSAN117559	NODE_2_length_414041_cov_21.982252	31618	33330	+	fbpA	1-1713/1713	100	95.45	vfdb	NP_465354	(fbpA) fibronectin-binding protein [FbpA (VF0349) - Adherence (VFC0001)] [Listeria monocytogenes EGD-e]
CFSAN117559	NODE_2_length_414041_cov_21.982252	47906	48370	-	lspA	1-465/465	100	99.78	vfdb	NP_465369	(lspA) signal peptidase II [Lsp (VF0351) - Post-translational modification (VFC0315)] [Listeria monocytogenes EGD-e]
CFSAN117559	NODE_2_length_414041_cov_21.982252	51295	52227	-	lpeA	1-933/933	100	97.53	vfdb	NP_465372	(lpeA) lipoprotein promoting cell invasion [LpeA (VF0346) - Invasion (VFC0083)] [Listeria monocytogenes EGD-e]
CFSAN117559	NODE_2_length_414041_cov_21.982252	272673	273650	-	bsh	1-978/978	100	99.9	vfdb	NP_465591	(bsh) bile salt hydrolase [BSH (VF0350) - Stress survival (VFC0282)] [Listeria monocytogenes EGD-e]
CFSAN117559	NODE_2_length_414041_cov_21.982252	400088	401797	-	hbp2	1-1710/1710	100	99.94	vfdb	NP_465709	(hbp2) hypothetical protein [SvpA (VF0263) - Nutritional/Metabolic factor (VFC0272)] [Listeria monocytogenes EGD-e]
CFSAN117559	NODE_2_length_414041_cov_21.982252	401812	402435	-	hbp1/svpA	1-624/624	100	99.84	vfdb	NP_465710	(hbp1/svpA) Haemoglobin binding protein 1 [SvpA (VF0263) - Nutritional/Metabolic factor (VFC0272)] [Listeria monocytogenes EGD-e]
CFSAN117559	NODE_3_length_346247_cov_24.664140	108168	110723	-	inlJ	1-2556/2556	100	97.61	vfdb	NP_466343	(inlJ) internalin J [InlJ (VF0445) - Adherence (VFC0001)] [Listeria monocytogenes EGD-e]
CFSAN117559	NODE_4_length_227541_cov_23.886819	48140	48577	+	gtcA	1-438/438	100	99.77	vfdb	NP_466072	(gtcA) wall teichoic acid glycosylation protein GtcA [GtcA (VF0607) - Post-translational modification (VFC0315)] [Listeria monocytogenes EGD-e]
CFSAN117559	NODE_4_length_227541_cov_23.886819	128124	129290	-	inlP	1-1167/1167	100	92.8	vfdb	NP_465993	(inlP) internalin P [InlP (VF0577) - Adherence (VFC0001)] [Listeria monocytogenes EGD-e]
CFSAN117559	NODE_4_length_227541_cov_23.886819	130947	131543	-	clpP	1-597/597	100	99.83	vfdb	NP_465991	(clpP) ATP-dependent Clp protease proteolytic subunit [ClpP (VF0074) - Stress survival (VFC0282)] [Listeria monocytogenes EGD-e]
CFSAN117559	NODE_5_length_219483_cov_20.615488	113035	114471	-	iap/cwhA	1-1449/1449	99.17	98.28	vfdb	NP_464110	(iap/cwhA) P60 extracellular protein invasion associated protein Iap [P60 (VF0068) - Invasion (VFC0083)] [Listeria monocytogenes EGD-e]
CFSAN117559	NODE_6_length_206111_cov_20.236421	66822	68996	+	clpE	1-2175/2175	100	99.63	vfdb	NP_464522	(clpE) ATP-dependent protease [ClpE (VF0073) - Stress survival (VFC0282)] [Listeria monocytogenes EGD-e]
CFSAN117559	NODE_6_length_206111_cov_20.236421	126090	127085	-	lplA1	1-996/996	100	98.49	vfdb	NP_464456	(lplA1) lipoate protein ligase [LplA1 (VF0347) - Nutritional/Metabolic factor (VFC0272)] [Listeria monocytogenes EGD-e]
CFSAN117559	NODE_7_length_200189_cov_22.849432	188337	190055	-	aut	1-1719/1719	100	99.65	vfdb	NP_464601	(aut) autolysin [Auto (VF0348) - Invasion (VFC0083)] [Listeria monocytogenes EGD-e]
CFSAN117559	NODE_8_length_163390_cov_21.023147	19059	20444	-	hpt	1-1386/1386	100	97.69	vfdb	NP_464364	(hpt) hexose phosphate transport protein [Hpt (VF0264) - Nutritional/Metabolic factor (VFC0272)] [Listeria monocytogenes EGD-e]
CFSAN117561	NODE_10_length_95276_cov_28.980504	5263	6705	-	iap/cwhA	1-1449/1449	99.59	99.59	vfdb	NP_464110	(iap/cwhA) P60 extracellular protein invasion associated protein Iap [P60 (VF0068) - Invasion (VFC0083)] [Listeria monocytogenes EGD-e]
CFSAN117561	NODE_12_length_87244_cov_28.999725	13101	15566	+	inlF	1-2466/2466	100	100	vfdb	NP_463939	(inlF) internalin F [InlF (VF0447) - Adherence (VFC0001)] [Listeria monocytogenes EGD-e]
CFSAN117561	NODE_12_length_87244_cov_28.999725	20954	22354	+	pdgA	1-1401/1401	100	100	vfdb	NP_463944	(pdgA) Peptidoglycan N-deacetylase [PgdA (VF0442) - Immune modulation (VFC0258)] [Listeria monocytogenes EGD-e]
CFSAN117561	NODE_12_length_87244_cov_28.999725	38006	40408	+	inlA	1-2403/2403	100	100	vfdb	NP_463962	(inlA) Internalin A [InlA (VF0069) - Invasion (VFC0083)] [Listeria monocytogenes EGD-e]
CFSAN117561	NODE_12_length_87244_cov_28.999725	40493	42385	+	inlB	1-1893/1893	100	100	vfdb	NP_463963	(inlB) Internalin B [InlB (VF0070) - Invasion (VFC0083)] [Listeria monocytogenes EGD-e]
CFSAN117561	NODE_12_length_87244_cov_28.999725	50990	51607	+	lntA	1-618/618	100	99.68	vfdb	NP_463967	(lntA) listeria nuclear targeted protein A [LntA (VF0440) - Immune modulation (VFC0258)] [Listeria monocytogenes EGD-e]
CFSAN117561	NODE_14_length_84742_cov_36.491284	2304	4766	+	clpC	1-2463/2463	100	100	vfdb	NP_463763	(clpC) endopeptidase Clp ATP-binding chain C [ClpC (VF0072) - Stress survival (VFC0282)] [Listeria monocytogenes EGD-e]
CFSAN117561	NODE_16_length_80632_cov_33.348040	34249	36804	-	inlJ	1-2556/2556	100	100	vfdb	NP_466343	(inlJ) internalin J [InlJ (VF0445) - Adherence (VFC0001)] [Listeria monocytogenes EGD-e]
CFSAN117561	NODE_1_length_199929_cov_32.525020	129659	130636	-	bsh	1-978/978	100	100	vfdb	NP_465591	(bsh) bile salt hydrolase [BSH (VF0350) - Stress survival (VFC0282)] [Listeria monocytogenes EGD-e]
CFSAN117561	NODE_20_length_71276_cov_36.897103	23371	23808	-	gtcA	1-438/438	100	100	vfdb	NP_466072	(gtcA) wall teichoic acid glycosylation protein GtcA [GtcA (VF0607) - Post-translational modification (VFC0315)] [Listeria monocytogenes EGD-e]
CFSAN117561	NODE_20_length_71276_cov_36.897103	33558	36311	+	ami	1-2754/2754	100	99.27	vfdb	NP_466081	(ami) autolysin amidase adhesin [Ami (VF0071) - Adherence (VFC0001)] [Listeria monocytogenes EGD-e]
CFSAN117561	NODE_23_length_54521_cov_23.441280	25426	27143	-	aut	1-1719/1719	99.94	99.83	vfdb	NP_464601	(aut) autolysin [Auto (VF0348) - Invasion (VFC0083)] [Listeria monocytogenes EGD-e]
CFSAN117561	NODE_24_length_51787_cov_27.532191	19796	21664	+	oatA	1-1869/1869	100	99.57	vfdb	NP_464816	(oatA) peptidoglycan O-acetyltransferase [OatA (VF0441) - Immune modulation (VFC0258)] [Listeria monocytogenes EGD-e]
CFSAN117561	NODE_24_length_51787_cov_27.532191	21698	23494	-	inlK	1-1797/1797	100	100	vfdb	NP_464815	(inlK) internalin K [InlK (VF0439) - Immune modulation (VFC0258)] [Listeria monocytogenes EGD-e]
CFSAN117561	NODE_28_length_37663_cov_35.219176	25100	25969	-	plcB	1-870/870	100	100	vfdb	NP_463736	(plcB) phospholipase C [PlcB (VF0067) - Exotoxin (VFC0235)] [Listeria monocytogenes EGD-e]
CFSAN117561	NODE_28_length_37663_cov_35.219176	26005	27924	-	actA	1-1920/1920	100	100	vfdb	NP_463735	(actA) actin-assembly inducing protein precursor [ActA (VF0066) - Motility (VFC0204)] [Listeria monocytogenes EGD-e]
CFSAN117561	NODE_28_length_37663_cov_35.219176	28123	29655	-	mpl	1-1533/1533	100	99.94	vfdb	NP_463734	(mpl) Zinc metalloproteinase precursor [Mpl (VF0065) - Exoenzyme (VFC0251)] [Listeria monocytogenes EGD-e]
CFSAN117561	NODE_28_length_37663_cov_35.219176	29986	31575	-	hly	1-1590/1590	100	100	vfdb	NP_463733	(hly) listeriolysin O precursor [LLO (VF0064) - Exotoxin (VFC0235)] [Listeria monocytogenes EGD-e]
CFSAN117561	NODE_28_length_37663_cov_35.219176	31817	32770	+	plcA	1-954/954	100	100	vfdb	NP_463732	(plcA) phosphatidylinositol-specific phospholipase c [PlcA (VF0063) - Exotoxin (VFC0235)] [Listeria monocytogenes EGD-e]
CFSAN117561	NODE_28_length_37663_cov_35.219176	33041	33754	+	prfA	1-714/714	100	100	vfdb	NP_463731	(prfA) listeriolysin positive regulatory protein [PrfA (VF0062) - Regulation (VFC0301)] [Listeria monocytogenes EGD-e]
CFSAN117561	NODE_29_length_37063_cov_34.847899	20691	25826	+	lapB	1-5136/5136	100	98.87	vfdb	NP_465191	(lapB) Listeria adhesion protein LapB [LapB (VF0446) - Adherence (VFC0001)] [Listeria monocytogenes EGD-e]
CFSAN117561	NODE_2_length_187449_cov_30.409610	49214	51388	+	clpE	1-2175/2175	100	100	vfdb	NP_464522	(clpE) ATP-dependent protease [ClpE (VF0073) - Stress survival (VFC0282)] [Listeria monocytogenes EGD-e]
CFSAN117561	NODE_2_length_187449_cov_30.409610	108482	109477	-	lplA1	1-996/996	100	100	vfdb	NP_464456	(lplA1) lipoate protein ligase [LplA1 (VF0347) - Nutritional/Metabolic factor (VFC0272)] [Listeria monocytogenes EGD-e]
CFSAN117561	NODE_33_length_26635_cov_29.340426	6135	7520	+	hpt	1-1386/1386	100	97.83	vfdb	NP_464364	(hpt) hexose phosphate transport protein [Hpt (VF0264) - Nutritional/Metabolic factor (VFC0272)] [Listeria monocytogenes EGD-e]
CFSAN117561	NODE_3_length_179342_cov_31.591401	88588	89469	-	prsA2	1-882/882	100	100	vfdb	NP_465743	(prsA2) post translocation chaperone PrsA2 [PrsA2 (VF0449) - Post-translational modification (VFC0315)] [Listeria monocytogenes EGD-e]
CFSAN117561	NODE_3_length_179342_cov_31.591401	121552	122175	+	hbp1/svpA	1-624/624	100	100	vfdb	NP_465710	(hbp1/svpA) Haemoglobin binding protein 1 [SvpA (VF0263) - Nutritional/Metabolic factor (VFC0272)] [Listeria monocytogenes EGD-e]
CFSAN117561	NODE_3_length_179342_cov_31.591401	122190	123899	+	hbp2	1-1710/1710	100	100	vfdb	NP_465709	(hbp2) hypothetical protein [SvpA (VF0263) - Nutritional/Metabolic factor (VFC0272)] [Listeria monocytogenes EGD-e]
CFSAN117561	NODE_48_length_7411_cov_30.174492	126	1016	+	inlC	1-891/891	100	100	vfdb	NP_465311	(inlC) internalin C [InlC (VF0438) - Immune modulation (VFC0258)] [Listeria monocytogenes EGD-e]
CFSAN117561	NODE_4_length_155542_cov_34.501219	42890	44602	+	fbpA	1-1713/1713	100	99.88	vfdb	NP_465354	(fbpA) fibronectin-binding protein [FbpA (VF0349) - Adherence (VFC0001)] [Listeria monocytogenes EGD-e]
CFSAN117561	NODE_4_length_155542_cov_34.501219	59174	59638	-	lspA	1-465/465	100	100	vfdb	NP_465369	(lspA) signal peptidase II [Lsp (VF0351) - Post-translational modification (VFC0315)] [Listeria monocytogenes EGD-e]
CFSAN117561	NODE_4_length_155542_cov_34.501219	62563	63495	-	lpeA	1-933/933	100	100	vfdb	NP_465372	(lpeA) lipoprotein promoting cell invasion [LpeA (VF0346) - Invasion (VFC0083)] [Listeria monocytogenes EGD-e]
CFSAN117561	NODE_5_length_120523_cov_34.391018	56118	57284	-	inlP	1-1167/1167	100	99.14	vfdb	NP_465993	(inlP) internalin P [InlP (VF0577) - Adherence (VFC0001)] [Listeria monocytogenes EGD-e]
CFSAN117561	NODE_5_length_120523_cov_34.391018	58939	59535	-	clpP	1-597/597	100	100	vfdb	NP_465991	(clpP) ATP-dependent Clp protease proteolytic subunit [ClpP (VF0074) - Stress survival (VFC0282)] [Listeria monocytogenes EGD-e]
CFSAN117561	NODE_6_length_119970_cov_29.421652	24235	26835	-	lap	1-2601/2601	100	100	vfdb	NP_465159	(lap) Listeria adhesion protein Lap [Lap (VF0444) - Adherence (VFC0001)] [Listeria monocytogenes EGD-e]
CFSAN117565	NODE_11_length_92672_cov_33.850321	13090	15555	+	inlF	1-2466/2466	100	100	vfdb	NP_463939	(inlF) internalin F [InlF (VF0447) - Adherence (VFC0001)] [Listeria monocytogenes EGD-e]
CFSAN117565	NODE_11_length_92672_cov_33.850321	20943	22343	+	pdgA	1-1401/1401	100	100	vfdb	NP_463944	(pdgA) Peptidoglycan N-deacetylase [PgdA (VF0442) - Immune modulation (VFC0258)] [Listeria monocytogenes EGD-e]
CFSAN117565	NODE_11_length_92672_cov_33.850321	37995	40397	+	inlA	1-2403/2403	100	100	vfdb	NP_463962	(inlA) Internalin A [InlA (VF0069) - Invasion (VFC0083)] [Listeria monocytogenes EGD-e]
CFSAN117565	NODE_11_length_92672_cov_33.850321	40482	42374	+	inlB	1-1893/1893	100	100	vfdb	NP_463963	(inlB) Internalin B [InlB (VF0070) - Invasion (VFC0083)] [Listeria monocytogenes EGD-e]
CFSAN117565	NODE_11_length_92672_cov_33.850321	50979	51596	+	lntA	1-618/618	100	99.68	vfdb	NP_463967	(lntA) listeria nuclear targeted protein A [LntA (VF0440) - Immune modulation (VFC0258)] [Listeria monocytogenes EGD-e]
CFSAN117565	NODE_12_length_64254_cov_40.927285	30489	31202	-	prfA	1-714/714	100	100	vfdb	NP_463731	(prfA) listeriolysin positive regulatory protein [PrfA (VF0062) - Regulation (VFC0301)] [Listeria monocytogenes EGD-e]
CFSAN117565	NODE_12_length_64254_cov_40.927285	31473	32426	-	plcA	1-954/954	100	100	vfdb	NP_463732	(plcA) phosphatidylinositol-specific phospholipase c [PlcA (VF0063) - Exotoxin (VFC0235)] [Listeria monocytogenes EGD-e]
CFSAN117565	NODE_12_length_64254_cov_40.927285	32668	34257	+	hly	1-1590/1590	100	100	vfdb	NP_463733	(hly) listeriolysin O precursor [LLO (VF0064) - Exotoxin (VFC0235)] [Listeria monocytogenes EGD-e]
CFSAN117565	NODE_12_length_64254_cov_40.927285	34588	36120	+	mpl	1-1533/1533	100	99.94	vfdb	NP_463734	(mpl) Zinc metalloproteinase precursor [Mpl (VF0065) - Exoenzyme (VFC0251)] [Listeria monocytogenes EGD-e]
CFSAN117565	NODE_12_length_64254_cov_40.927285	36319	38238	+	actA	1-1920/1920	100	100	vfdb	NP_463735	(actA) actin-assembly inducing protein precursor [ActA (VF0066) - Motility (VFC0204)] [Listeria monocytogenes EGD-e]
CFSAN117565	NODE_12_length_64254_cov_40.927285	38274	39143	+	plcB	1-870/870	100	100	vfdb	NP_463736	(plcB) phospholipase C [PlcB (VF0067) - Exotoxin (VFC0235)] [Listeria monocytogenes EGD-e]
CFSAN117565	NODE_1_length_546623_cov_39.756174	8073	8963	-	inlC	1-891/891	100	100	vfdb	NP_465311	(inlC) internalin C [InlC (VF0438) - Immune modulation (VFC0258)] [Listeria monocytogenes EGD-e]
CFSAN117565	NODE_1_length_546623_cov_39.756174	51995	53707	+	fbpA	1-1713/1713	100	99.88	vfdb	NP_465354	(fbpA) fibronectin-binding protein [FbpA (VF0349) - Adherence (VFC0001)] [Listeria monocytogenes EGD-e]
CFSAN117565	NODE_1_length_546623_cov_39.756174	68279	68743	-	lspA	1-465/465	100	100	vfdb	NP_465369	(lspA) signal peptidase II [Lsp (VF0351) - Post-translational modification (VFC0315)] [Listeria monocytogenes EGD-e]
CFSAN117565	NODE_1_length_546623_cov_39.756174	71668	72600	-	lpeA	1-933/933	100	100	vfdb	NP_465372	(lpeA) lipoprotein promoting cell invasion [LpeA (VF0346) - Invasion (VFC0083)] [Listeria monocytogenes EGD-e]
CFSAN117565	NODE_1_length_546623_cov_39.756174	294293	295270	-	bsh	1-978/978	100	100	vfdb	NP_465591	(bsh) bile salt hydrolase [BSH (VF0350) - Stress survival (VFC0282)] [Listeria monocytogenes EGD-e]
CFSAN117565	NODE_1_length_546623_cov_39.756174	420245	421954	-	hbp2	1-1710/1710	100	100	vfdb	NP_465709	(hbp2) hypothetical protein [SvpA (VF0263) - Nutritional/Metabolic factor (VFC0272)] [Listeria monocytogenes EGD-e]
CFSAN117565	NODE_1_length_546623_cov_39.756174	421969	422592	-	hbp1/svpA	1-624/624	100	100	vfdb	NP_465710	(hbp1/svpA) Haemoglobin binding protein 1 [SvpA (VF0263) - Nutritional/Metabolic factor (VFC0272)] [Listeria monocytogenes EGD-e]
CFSAN117565	NODE_1_length_546623_cov_39.756174	454675	455556	+	prsA2	1-882/882	100	100	vfdb	NP_465743	(prsA2) post translocation chaperone PrsA2 [PrsA2 (VF0449) - Post-translational modification (VFC0315)] [Listeria monocytogenes EGD-e]
CFSAN117565	NODE_2_length_410198_cov_41.244260	228530	231085	+	inlJ	1-2556/2556	100	100	vfdb	NP_466343	(inlJ) internalin J [InlJ (VF0445) - Adherence (VFC0001)] [Listeria monocytogenes EGD-e]
CFSAN117565	NODE_3_length_343119_cov_34.833404	109654	111096	-	iap/cwhA	1-1449/1449	99.59	99.59	vfdb	NP_464110	(iap/cwhA) P60 extracellular protein invasion associated protein Iap [P60 (VF0068) - Invasion (VFC0083)] [Listeria monocytogenes EGD-e]
CFSAN117565	NODE_4_length_278345_cov_31.941535	27114	28831	-	aut	1-1719/1719	99.94	99.83	vfdb	NP_464601	(aut) autolysin [Auto (VF0348) - Invasion (VFC0083)] [Listeria monocytogenes EGD-e]
CFSAN117565	NODE_4_length_278345_cov_31.941535	105827	108001	+	clpE	1-2175/2175	100	100	vfdb	NP_464522	(clpE) ATP-dependent protease [ClpE (VF0073) - Stress survival (VFC0282)] [Listeria monocytogenes EGD-e]
CFSAN117565	NODE_4_length_278345_cov_31.941535	165095	166090	-	lplA1	1-996/996	100	100	vfdb	NP_464456	(lplA1) lipoate protein ligase [LplA1 (VF0347) - Nutritional/Metabolic factor (VFC0272)] [Listeria monocytogenes EGD-e]
CFSAN117565	NODE_4_length_278345_cov_31.941535	263364	264749	-	hpt	1-1386/1386	100	97.83	vfdb	NP_464364	(hpt) hexose phosphate transport protein [Hpt (VF0264) - Nutritional/Metabolic factor (VFC0272)] [Listeria monocytogenes EGD-e]
CFSAN117565	NODE_5_length_242303_cov_40.096917	34966	37719	-	ami	1-2754/2754	100	99.27	vfdb	NP_466081	(ami) autolysin amidase adhesin [Ami (VF0071) - Adherence (VFC0001)] [Listeria monocytogenes EGD-e]
CFSAN117565	NODE_5_length_242303_cov_40.096917	47469	47906	+	gtcA	1-438/438	100	100	vfdb	NP_466072	(gtcA) wall teichoic acid glycosylation protein GtcA [GtcA (VF0607) - Post-translational modification (VFC0315)] [Listeria monocytogenes EGD-e]
CFSAN117565	NODE_5_length_242303_cov_40.096917	127454	128620	-	inlP	1-1167/1167	100	99.14	vfdb	NP_465993	(inlP) internalin P [InlP (VF0577) - Adherence (VFC0001)] [Listeria monocytogenes EGD-e]
CFSAN117565	NODE_5_length_242303_cov_40.096917	130275	130871	-	clpP	1-597/597	100	100	vfdb	NP_465991	(clpP) ATP-dependent Clp protease proteolytic subunit [ClpP (VF0074) - Stress survival (VFC0282)] [Listeria monocytogenes EGD-e]
CFSAN117565	NODE_6_length_217173_cov_33.601937	151563	154163	+	lap	1-2601/2601	100	100	vfdb	NP_465159	(lap) Listeria adhesion protein Lap [Lap (VF0444) - Adherence (VFC0001)] [Listeria monocytogenes EGD-e]
CFSAN117565	NODE_6_length_217173_cov_33.601937	191348	196483	-	lapB	1-5136/5136	100	98.87	vfdb	NP_465191	(lapB) Listeria adhesion protein LapB [LapB (VF0446) - Adherence (VFC0001)] [Listeria monocytogenes EGD-e]
CFSAN117565	NODE_7_length_212571_cov_31.497628	206643	208511	+	oatA	1-1869/1869	100	99.57	vfdb	NP_464816	(oatA) peptidoglycan O-acetyltransferase [OatA (VF0441) - Immune modulation (VFC0258)] [Listeria monocytogenes EGD-e]
CFSAN117565	NODE_7_length_212571_cov_31.497628	208545	210341	-	inlK	1-1797/1797	100	100	vfdb	NP_464815	(inlK) internalin K [InlK (VF0439) - Immune modulation (VFC0258)] [Listeria monocytogenes EGD-e]
CFSAN117565	NODE_9_length_167711_cov_38.866449	2304	4766	+	clpC	1-2463/2463	100	100	vfdb	NP_463763	(clpC) endopeptidase Clp ATP-binding chain C [ClpC (VF0072) - Stress survival (VFC0282)] [Listeria monocytogenes EGD-e]
CFSAN117567	NODE_10_length_121210_cov_40.544866	2432	4894	+	clpC	1-2463/2463	100	94.07	vfdb	NP_463763	(clpC) endopeptidase Clp ATP-binding chain C [ClpC (VF0072) - Stress survival (VFC0282)] [Listeria monocytogenes EGD-e]
CFSAN117567	NODE_10_length_121210_cov_40.544866	104427	105683	-	vip	1-1200/1200	100	85.28	vfdb	NP_463850	(vip) surface adhesin Vip [Vip (VF0443) - Invasion (VFC0083)] [Listeria monocytogenes EGD-e]
CFSAN117567	NODE_12_length_108103_cov_39.317923	67091	68068	+	bsh	1-978/978	100	97.75	vfdb	NP_465591	(bsh) bile salt hydrolase [BSH (VF0350) - Stress survival (VFC0282)] [Listeria monocytogenes EGD-e]
CFSAN117567	NODE_13_length_104155_cov_39.704676	70255	72726	+	inlF	1-2466/2466	99.96	80.79	vfdb	NP_463939	(inlF) internalin F [InlF (VF0447) - Adherence (VFC0001)] [Listeria monocytogenes EGD-e]
CFSAN117567	NODE_13_length_104155_cov_39.704676	78112	79512	+	pdgA	1-1401/1401	100	97	vfdb	NP_463944	(pdgA) Peptidoglycan N-deacetylase [PgdA (VF0442) - Immune modulation (VFC0258)] [Listeria monocytogenes EGD-e]
CFSAN117567	NODE_16_length_78760_cov_35.346508	64596	66305	-	hbp2	1-1710/1710	100	93.51	vfdb	NP_465709	(hbp2) hypothetical protein [SvpA (VF0263) - Nutritional/Metabolic factor (VFC0272)] [Listeria monocytogenes EGD-e]
CFSAN117567	NODE_16_length_78760_cov_35.346508	66318	66944	-	hbp1/svpA	1-624/624	100	90.27	vfdb	NP_465710	(hbp1/svpA) Haemoglobin binding protein 1 [SvpA (VF0263) - Nutritional/Metabolic factor (VFC0272)] [Listeria monocytogenes EGD-e]
CFSAN117567	NODE_19_length_40280_cov_42.081463	14454	19592	-	lapB	1-5136/5136	100	93.29	vfdb	NP_465191	(lapB) Listeria adhesion protein LapB [LapB (VF0446) - Adherence (VFC0001)] [Listeria monocytogenes EGD-e]
CFSAN117567	NODE_1_length_463682_cov_36.873618	163548	164933	+	hpt	1-1386/1386	100	97.62	vfdb	NP_464364	(hpt) hexose phosphate transport protein [Hpt (VF0264) - Nutritional/Metabolic factor (VFC0272)] [Listeria monocytogenes EGD-e]
CFSAN117567	NODE_1_length_463682_cov_36.873618	299894	300889	+	lplA1	1-996/996	100	92.77	vfdb	NP_464456	(lplA1) lipoate protein ligase [LplA1 (VF0347) - Nutritional/Metabolic factor (VFC0272)] [Listeria monocytogenes EGD-e]
CFSAN117567	NODE_1_length_463682_cov_36.873618	358923	361091	-	clpE	1-2175/2175	99.72	93.47	vfdb	NP_464522	(clpE) ATP-dependent protease [ClpE (VF0073) - Stress survival (VFC0282)] [Listeria monocytogenes EGD-e]
CFSAN117567	NODE_1_length_463682_cov_36.873618	458119	458268	+	llsA	1-150/150	100	98	vfdb	AHK25016	(llsA) listeriolysin S [LLS (VF0410) - Exotoxin (VFC0235)] [Listeria innocua SLCC6294]
CFSAN117567	NODE_1_length_463682_cov_36.873618	458333	459220	+	llsG	1-888/888	100	97.3	vfdb	AHK25017	(llsG) ABC transporter ATP-binding protein LlsG [LLS (VF0410) - Exotoxin (VFC0235)] [Listeria innocua SLCC6294]
CFSAN117567	NODE_1_length_463682_cov_36.873618	459220	459969	+	llsH	1-750/750	100	97.47	vfdb	AHK25018	(llsH) ABC transporter permease protein LlsH [LLS (VF0410) - Exotoxin (VFC0235)] [Listeria innocua SLCC6294]
CFSAN117567	NODE_1_length_463682_cov_36.873618	460010	460327	+	llsX	1-318/318	100	97.17	vfdb	AHK25019	(llsX) LlsX [LLS (VF0410) - Exotoxin (VFC0235)] [Listeria innocua SLCC6294]
CFSAN117567	NODE_1_length_463682_cov_36.873618	460324	461199	+	llsB	1-876/876	100	97.37	vfdb	AHK25020	(llsB) SagB family dehydrogenase LlsB [LLS (VF0410) - Exotoxin (VFC0235)] [Listeria innocua SLCC6294]
CFSAN117567	NODE_1_length_463682_cov_36.873618	461207	462124	+	llsY	1-918/918	100	96.19	vfdb	AHK25021	(llsY) LlsY [LLS (VF0410) - Exotoxin (VFC0235)] [Listeria innocua SLCC6294]
CFSAN117567	NODE_1_length_463682_cov_36.873618	462117	463430	+	llsD	1-1314/1314	100	98.1	vfdb	AHK25022	(llsD) streptolysin-associated protein LlsD [LLS (VF0410) - Exotoxin (VFC0235)] [Listeria innocua SLCC6294]
CFSAN117567	NODE_20_length_32502_cov_34.008154	5671	8073	+	inlA	1-2403/2403	100	96.75	vfdb	NP_463962	(inlA) Internalin A [InlA (VF0069) - Invasion (VFC0083)] [Listeria monocytogenes EGD-e]
CFSAN117567	NODE_20_length_32502_cov_34.008154	8158	10048	+	inlB	1-1891/1893	99.89	92.7	vfdb	NP_463963	(inlB) Internalin B [InlB (VF0070) - Invasion (VFC0083)] [Listeria monocytogenes EGD-e]
CFSAN117567	NODE_20_length_32502_cov_34.008154	11750	12367	+	lntA	1-618/618	100	96.12	vfdb	NP_463967	(lntA) listeria nuclear targeted protein A [LntA (VF0440) - Immune modulation (VFC0258)] [Listeria monocytogenes EGD-e]
CFSAN117567	NODE_2_length_437215_cov_35.414200	49815	51641	+	inlK	1-1797/1797	100	89	vfdb	NP_464815	(inlK) internalin K [InlK (VF0439) - Immune modulation (VFC0258)] [Listeria monocytogenes EGD-e]
CFSAN117567	NODE_2_length_437215_cov_35.414200	51674	53560	-	oatA	1-1869/1869	100	93.53	vfdb	NP_464816	(oatA) peptidoglycan O-acetyltransferase [OatA (VF0441) - Immune modulation (VFC0258)] [Listeria monocytogenes EGD-e]
CFSAN117567	NODE_2_length_437215_cov_35.414200	409197	411797	+	lap	1-2601/2601	100	97.19	vfdb	NP_465159	(lap) Listeria adhesion protein Lap [Lap (VF0444) - Adherence (VFC0001)] [Listeria monocytogenes EGD-e]
CFSAN117567	NODE_3_length_255874_cov_42.186215	184793	185725	+	lpeA	1-933/933	100	96.78	vfdb	NP_465372	(lpeA) lipoprotein promoting cell invasion [LpeA (VF0346) - Invasion (VFC0083)] [Listeria monocytogenes EGD-e]
CFSAN117567	NODE_3_length_255874_cov_42.186215	188650	189114	+	lspA	1-465/465	100	97.42	vfdb	NP_465369	(lspA) signal peptidase II [Lsp (VF0351) - Post-translational modification (VFC0315)] [Listeria monocytogenes EGD-e]
CFSAN117567	NODE_3_length_255874_cov_42.186215	203684	205396	-	fbpA	1-1713/1713	100	91.65	vfdb	NP_465354	(fbpA) fibronectin-binding protein [FbpA (VF0349) - Adherence (VFC0001)] [Listeria monocytogenes EGD-e]
CFSAN117567	NODE_3_length_255874_cov_42.186215	248162	249052	+	inlC	1-891/891	100	97.19	vfdb	NP_465311	(inlC) internalin C [InlC (VF0438) - Immune modulation (VFC0258)] [Listeria monocytogenes EGD-e]
CFSAN117567	NODE_4_length_187319_cov_37.376084	107368	108795	-	iap/cwhA	1-1449/1449	98.34	95.25	vfdb	NP_464110	(iap/cwhA) P60 extracellular protein invasion associated protein Iap [P60 (VF0068) - Invasion (VFC0083)] [Listeria monocytogenes EGD-e]
CFSAN117567	NODE_6_length_159548_cov_40.108662	125877	126590	-	prfA	1-714/714	100	97.62	vfdb	NP_463731	(prfA) listeriolysin positive regulatory protein [PrfA (VF0062) - Regulation (VFC0301)] [Listeria monocytogenes EGD-e]
CFSAN117567	NODE_6_length_159548_cov_40.108662	126863	127816	-	plcA	1-954/954	100	97.38	vfdb	NP_463732	(plcA) phosphatidylinositol-specific phospholipase c [PlcA (VF0063) - Exotoxin (VFC0235)] [Listeria monocytogenes EGD-e]
CFSAN117567	NODE_6_length_159548_cov_40.108662	128059	129648	+	hly	1-1590/1590	100	97.3	vfdb	NP_463733	(hly) listeriolysin O precursor [LLO (VF0064) - Exotoxin (VFC0235)] [Listeria monocytogenes EGD-e]
CFSAN117567	NODE_6_length_159548_cov_40.108662	129979	131511	+	mpl	1-1533/1533	100	94.85	vfdb	NP_463734	(mpl) Zinc metalloproteinase precursor [Mpl (VF0065) - Exoenzyme (VFC0251)] [Listeria monocytogenes EGD-e]
CFSAN117567	NODE_6_length_159548_cov_40.108662	133562	134430	+	plcB	2-870/870	99.89	95.51	vfdb	NP_463736	(plcB) phospholipase C [PlcB (VF0067) - Exotoxin (VFC0235)] [Listeria monocytogenes EGD-e]
CFSAN117567	NODE_7_length_149208_cov_36.967474	20216	21097	+	prsA2	1-882/882	100	96.48	vfdb	NP_465743	(prsA2) post translocation chaperone PrsA2 [PrsA2 (VF0449) - Post-translational modification (VFC0315)] [Listeria monocytogenes EGD-e]
CFSAN117567	NODE_8_length_143540_cov_43.078180	41653	42090	+	gtcA	1-438/438	99.54	80.45	vfdb	NP_466072	(gtcA) wall teichoic acid glycosylation protein GtcA [GtcA (VF0607) - Post-translational modification (VFC0315)] [Listeria monocytogenes EGD-e]
CFSAN117567	NODE_8_length_143540_cov_43.078180	121638	122804	-	inlP	1-1167/1167	100	95.2	vfdb	NP_465993	(inlP) internalin P [InlP (VF0577) - Adherence (VFC0001)] [Listeria monocytogenes EGD-e]
CFSAN117567	NODE_8_length_143540_cov_43.078180	124462	125058	-	clpP	1-597/597	100	96.82	vfdb	NP_465991	(clpP) ATP-dependent Clp protease proteolytic subunit [ClpP (VF0074) - Stress survival (VFC0282)] [Listeria monocytogenes EGD-e]
CFSAN117571	NODE_10_length_143325_cov_30.813398	41438	41875	+	gtcA	1-438/438	99.54	80.45	vfdb	NP_466072	(gtcA) wall teichoic acid glycosylation protein GtcA [GtcA (VF0607) - Post-translational modification (VFC0315)] [Listeria monocytogenes EGD-e]
CFSAN117571	NODE_10_length_143325_cov_30.813398	121423	122589	-	inlP	1-1167/1167	100	95.2	vfdb	NP_465993	(inlP) internalin P [InlP (VF0577) - Adherence (VFC0001)] [Listeria monocytogenes EGD-e]
CFSAN117571	NODE_10_length_143325_cov_30.813398	124247	124843	-	clpP	1-597/597	100	96.82	vfdb	NP_465991	(clpP) ATP-dependent Clp protease proteolytic subunit [ClpP (VF0074) - Stress survival (VFC0282)] [Listeria monocytogenes EGD-e]
CFSAN117571	NODE_14_length_121210_cov_28.746133	2432	4894	+	clpC	1-2463/2463	100	94.07	vfdb	NP_463763	(clpC) endopeptidase Clp ATP-binding chain C [ClpC (VF0072) - Stress survival (VFC0282)] [Listeria monocytogenes EGD-e]
CFSAN117571	NODE_14_length_121210_cov_28.746133	104427	105683	-	vip	1-1200/1200	100	85.28	vfdb	NP_463850	(vip) surface adhesin Vip [Vip (VF0443) - Invasion (VFC0083)] [Listeria monocytogenes EGD-e]
CFSAN117571	NODE_15_length_104289_cov_28.014900	70255	72726	+	inlF	1-2466/2466	99.96	80.79	vfdb	NP_463939	(inlF) internalin F [InlF (VF0447) - Adherence (VFC0001)] [Listeria monocytogenes EGD-e]
CFSAN117571	NODE_15_length_104289_cov_28.014900	78112	79512	+	pdgA	1-1401/1401	100	97	vfdb	NP_463944	(pdgA) Peptidoglycan N-deacetylase [PgdA (VF0442) - Immune modulation (VFC0258)] [Listeria monocytogenes EGD-e]
CFSAN117571	NODE_1_length_417906_cov_25.854220	113212	113799	-	llsP	1-588/588	100	93.71	vfdb	AHK25023	(llsP) CAAX amino terminal protease LlsP [LLS (VF0410) - Exotoxin (VFC0235)] [Listeria innocua SLCC6294]
CFSAN117571	NODE_1_length_417906_cov_25.854220	113792	115105	-	llsD	1-1314/1314	100	98.1	vfdb	AHK25022	(llsD) streptolysin-associated protein LlsD [LLS (VF0410) - Exotoxin (VFC0235)] [Listeria innocua SLCC6294]
CFSAN117571	NODE_1_length_417906_cov_25.854220	115098	116015	-	llsY	1-918/918	100	96.19	vfdb	AHK25021	(llsY) LlsY [LLS (VF0410) - Exotoxin (VFC0235)] [Listeria innocua SLCC6294]
CFSAN117571	NODE_1_length_417906_cov_25.854220	116023	116898	-	llsB	1-876/876	100	97.37	vfdb	AHK25020	(llsB) SagB family dehydrogenase LlsB [LLS (VF0410) - Exotoxin (VFC0235)] [Listeria innocua SLCC6294]
CFSAN117571	NODE_1_length_417906_cov_25.854220	116895	117212	-	llsX	1-318/318	100	97.17	vfdb	AHK25019	(llsX) LlsX [LLS (VF0410) - Exotoxin (VFC0235)] [Listeria innocua SLCC6294]
CFSAN117571	NODE_1_length_417906_cov_25.854220	117253	118002	-	llsH	1-750/750	100	97.47	vfdb	AHK25018	(llsH) ABC transporter permease protein LlsH [LLS (VF0410) - Exotoxin (VFC0235)] [Listeria innocua SLCC6294]
CFSAN117571	NODE_1_length_417906_cov_25.854220	118002	118889	-	llsG	1-888/888	100	97.3	vfdb	AHK25017	(llsG) ABC transporter ATP-binding protein LlsG [LLS (VF0410) - Exotoxin (VFC0235)] [Listeria innocua SLCC6294]
CFSAN117571	NODE_1_length_417906_cov_25.854220	118954	119103	-	llsA	1-150/150	100	98	vfdb	AHK25016	(llsA) listeriolysin S [LLS (VF0410) - Exotoxin (VFC0235)] [Listeria innocua SLCC6294]
CFSAN117571	NODE_1_length_417906_cov_25.854220	216131	218299	+	clpE	1-2175/2175	99.72	93.47	vfdb	NP_464522	(clpE) ATP-dependent protease [ClpE (VF0073) - Stress survival (VFC0282)] [Listeria monocytogenes EGD-e]
CFSAN117571	NODE_1_length_417906_cov_25.854220	276333	277328	-	lplA1	1-996/996	100	92.77	vfdb	NP_464456	(lplA1) lipoate protein ligase [LplA1 (VF0347) - Nutritional/Metabolic factor (VFC0272)] [Listeria monocytogenes EGD-e]
CFSAN117571	NODE_1_length_417906_cov_25.854220	412289	413674	-	hpt	1-1386/1386	100	97.62	vfdb	NP_464364	(hpt) hexose phosphate transport protein [Hpt (VF0264) - Nutritional/Metabolic factor (VFC0272)] [Listeria monocytogenes EGD-e]
CFSAN117571	NODE_2_length_369423_cov_28.339403	6455	7345	-	inlC	1-891/891	100	97.19	vfdb	NP_465311	(inlC) internalin C [InlC (VF0438) - Immune modulation (VFC0258)] [Listeria monocytogenes EGD-e]
CFSAN117571	NODE_2_length_369423_cov_28.339403	50111	51823	+	fbpA	1-1713/1713	100	91.65	vfdb	NP_465354	(fbpA) fibronectin-binding protein [FbpA (VF0349) - Adherence (VFC0001)] [Listeria monocytogenes EGD-e]
CFSAN117571	NODE_2_length_369423_cov_28.339403	66393	66857	-	lspA	1-465/465	100	97.42	vfdb	NP_465369	(lspA) signal peptidase II [Lsp (VF0351) - Post-translational modification (VFC0315)] [Listeria monocytogenes EGD-e]
CFSAN117571	NODE_2_length_369423_cov_28.339403	69782	70714	-	lpeA	1-933/933	100	96.78	vfdb	NP_465372	(lpeA) lipoprotein promoting cell invasion [LpeA (VF0346) - Invasion (VFC0083)] [Listeria monocytogenes EGD-e]
CFSAN117571	NODE_2_length_369423_cov_28.339403	301547	302524	-	bsh	1-978/978	100	97.75	vfdb	NP_465591	(bsh) bile salt hydrolase [BSH (VF0350) - Stress survival (VFC0282)] [Listeria monocytogenes EGD-e]
CFSAN117571	NODE_4_length_228828_cov_27.300401	64611	66320	-	hbp2	1-1710/1710	100	93.51	vfdb	NP_465709	(hbp2) hypothetical protein [SvpA (VF0263) - Nutritional/Metabolic factor (VFC0272)] [Listeria monocytogenes EGD-e]
CFSAN117571	NODE_4_length_228828_cov_27.300401	66333	66959	-	hbp1/svpA	1-624/624	100	90.27	vfdb	NP_465710	(hbp1/svpA) Haemoglobin binding protein 1 [SvpA (VF0263) - Nutritional/Metabolic factor (VFC0272)] [Listeria monocytogenes EGD-e]
CFSAN117571	NODE_4_length_228828_cov_27.300401	99039	99920	+	prsA2	1-882/882	100	96.48	vfdb	NP_465743	(prsA2) post translocation chaperone PrsA2 [PrsA2 (VF0449) - Post-translational modification (VFC0315)] [Listeria monocytogenes EGD-e]
CFSAN117571	NODE_5_length_202331_cov_27.597995	57383	58810	+	iap/cwhA	1-1449/1449	98.34	95.25	vfdb	NP_464110	(iap/cwhA) P60 extracellular protein invasion associated protein Iap [P60 (VF0068) - Invasion (VFC0083)] [Listeria monocytogenes EGD-e]
CFSAN117571	NODE_5_length_202331_cov_27.597995	193258	193875	-	lntA	1-618/618	100	96.12	vfdb	NP_463967	(lntA) listeria nuclear targeted protein A [LntA (VF0440) - Immune modulation (VFC0258)] [Listeria monocytogenes EGD-e]
CFSAN117571	NODE_5_length_202331_cov_27.597995	195577	197467	-	inlB	1-1891/1893	99.89	92.7	vfdb	NP_463963	(inlB) Internalin B [InlB (VF0070) - Invasion (VFC0083)] [Listeria monocytogenes EGD-e]
CFSAN117571	NODE_5_length_202331_cov_27.597995	197552	199954	-	inlA	1-2403/2403	100	96.75	vfdb	NP_463962	(inlA) Internalin A [InlA (VF0069) - Invasion (VFC0083)] [Listeria monocytogenes EGD-e]
CFSAN117571	NODE_6_length_182374_cov_24.742487	50896	52722	+	inlK	1-1797/1797	100	89	vfdb	NP_464815	(inlK) internalin K [InlK (VF0439) - Immune modulation (VFC0258)] [Listeria monocytogenes EGD-e]
CFSAN117571	NODE_6_length_182374_cov_24.742487	52755	54641	-	oatA	1-1869/1869	100	93.53	vfdb	NP_464816	(oatA) peptidoglycan O-acetyltransferase [OatA (VF0441) - Immune modulation (VFC0258)] [Listeria monocytogenes EGD-e]
CFSAN117571	NODE_7_length_160194_cov_25.770983	91915	94515	+	lap	1-2601/2601	100	97.19	vfdb	NP_465159	(lap) Listeria adhesion protein Lap [Lap (VF0444) - Adherence (VFC0001)] [Listeria monocytogenes EGD-e]
CFSAN117571	NODE_7_length_160194_cov_25.770983	134368	139506	-	lapB	1-5136/5136	100	93.29	vfdb	NP_465191	(lapB) Listeria adhesion protein LapB [LapB (VF0446) - Adherence (VFC0001)] [Listeria monocytogenes EGD-e]
CFSAN117571	NODE_8_length_159548_cov_29.312757	125877	126590	-	prfA	1-714/714	100	97.62	vfdb	NP_463731	(prfA) listeriolysin positive regulatory protein [PrfA (VF0062) - Regulation (VFC0301)] [Listeria monocytogenes EGD-e]
CFSAN117571	NODE_8_length_159548_cov_29.312757	126863	127816	-	plcA	1-954/954	100	97.38	vfdb	NP_463732	(plcA) phosphatidylinositol-specific phospholipase c [PlcA (VF0063) - Exotoxin (VFC0235)] [Listeria monocytogenes EGD-e]
CFSAN117571	NODE_8_length_159548_cov_29.312757	128059	129648	+	hly	1-1590/1590	100	97.3	vfdb	NP_463733	(hly) listeriolysin O precursor [LLO (VF0064) - Exotoxin (VFC0235)] [Listeria monocytogenes EGD-e]
CFSAN117571	NODE_8_length_159548_cov_29.312757	129979	131511	+	mpl	1-1533/1533	100	94.85	vfdb	NP_463734	(mpl) Zinc metalloproteinase precursor [Mpl (VF0065) - Exoenzyme (VFC0251)] [Listeria monocytogenes EGD-e]
CFSAN117571	NODE_8_length_159548_cov_29.312757	133562	134430	+	plcB	2-870/870	99.89	95.51	vfdb	NP_463736	(plcB) phospholipase C [PlcB (VF0067) - Exotoxin (VFC0235)] [Listeria monocytogenes EGD-e]
CFSAN117572	NODE_11_length_69531_cov_38.166662	49507	51681	+	clpE	1-2175/2175	100	100	vfdb	NP_464522	(clpE) ATP-dependent protease [ClpE (VF0073) - Stress survival (VFC0282)] [Listeria monocytogenes EGD-e]
CFSAN117572	NODE_13_length_67413_cov_51.611881	19423	19860	-	gtcA	1-438/438	100	100	vfdb	NP_466072	(gtcA) wall teichoic acid glycosylation protein GtcA [GtcA (VF0607) - Post-translational modification (VFC0315)] [Listeria monocytogenes EGD-e]
CFSAN117572	NODE_13_length_67413_cov_51.611881	29610	32363	+	ami	1-2754/2754	100	99.27	vfdb	NP_466081	(ami) autolysin amidase adhesin [Ami (VF0071) - Adherence (VFC0001)] [Listeria monocytogenes EGD-e]
CFSAN117572	NODE_16_length_64317_cov_36.892008	57644	59086	+	iap/cwhA	1-1449/1449	99.59	99.59	vfdb	NP_464110	(iap/cwhA) P60 extracellular protein invasion associated protein Iap [P60 (VF0068) - Invasion (VFC0083)] [Listeria monocytogenes EGD-e]
CFSAN117572	NODE_24_length_44559_cov_28.872029	27465	29182	+	aut	1-1719/1719	99.94	99.83	vfdb	NP_464601	(aut) autolysin [Auto (VF0348) - Invasion (VFC0083)] [Listeria monocytogenes EGD-e]
CFSAN117572	NODE_26_length_37930_cov_38.619528	7609	8226	+	lntA	1-618/618	100	99.68	vfdb	NP_463967	(lntA) listeria nuclear targeted protein A [LntA (VF0440) - Immune modulation (VFC0258)] [Listeria monocytogenes EGD-e]
CFSAN117572	NODE_27_length_37622_cov_34.819789	23460	25169	-	hbp2	1-1710/1710	100	100	vfdb	NP_465709	(hbp2) hypothetical protein [SvpA (VF0263) - Nutritional/Metabolic factor (VFC0272)] [Listeria monocytogenes EGD-e]
CFSAN117572	NODE_27_length_37622_cov_34.819789	25184	25807	-	hbp1/svpA	1-624/624	100	100	vfdb	NP_465710	(hbp1/svpA) Haemoglobin binding protein 1 [SvpA (VF0263) - Nutritional/Metabolic factor (VFC0272)] [Listeria monocytogenes EGD-e]
CFSAN117572	NODE_28_length_37039_cov_44.351810	20691	25826	+	lapB	1-5136/5136	100	98.87	vfdb	NP_465191	(lapB) Listeria adhesion protein LapB [LapB (VF0446) - Adherence (VFC0001)] [Listeria monocytogenes EGD-e]
CFSAN117572	NODE_29_length_35532_cov_53.092106	2231	2827	-	clpP	1-597/597	100	100	vfdb	NP_465991	(clpP) ATP-dependent Clp protease proteolytic subunit [ClpP (VF0074) - Stress survival (VFC0282)] [Listeria monocytogenes EGD-e]
CFSAN117572	NODE_30_length_34677_cov_48.076556	30733	31446	-	prfA	1-714/714	100	100	vfdb	NP_463731	(prfA) listeriolysin positive regulatory protein [PrfA (VF0062) - Regulation (VFC0301)] [Listeria monocytogenes EGD-e]
CFSAN117572	NODE_30_length_34677_cov_48.076556	31717	32670	-	plcA	1-954/954	100	100	vfdb	NP_463732	(plcA) phosphatidylinositol-specific phospholipase c [PlcA (VF0063) - Exotoxin (VFC0235)] [Listeria monocytogenes EGD-e]
CFSAN117572	NODE_30_length_34677_cov_48.076556	32912	34501	+	hly	1-1590/1590	100	100	vfdb	NP_463733	(hly) listeriolysin O precursor [LLO (VF0064) - Exotoxin (VFC0235)] [Listeria monocytogenes EGD-e]
CFSAN117572	NODE_34_length_29827_cov_50.915556	161	1693	+	mpl	1-1533/1533	100	99.94	vfdb	NP_463734	(mpl) Zinc metalloproteinase precursor [Mpl (VF0065) - Exoenzyme (VFC0251)] [Listeria monocytogenes EGD-e]
CFSAN117572	NODE_34_length_29827_cov_50.915556	1892	3811	+	actA	1-1920/1920	100	100	vfdb	NP_463735	(actA) actin-assembly inducing protein precursor [ActA (VF0066) - Motility (VFC0204)] [Listeria monocytogenes EGD-e]
CFSAN117572	NODE_34_length_29827_cov_50.915556	3847	4716	+	plcB	1-870/870	100	100	vfdb	NP_463736	(plcB) phospholipase C [PlcB (VF0067) - Exotoxin (VFC0235)] [Listeria monocytogenes EGD-e]
CFSAN117572	NODE_38_length_26625_cov_38.535059	13220	14101	+	prsA2	1-882/882	100	100	vfdb	NP_465743	(prsA2) post translocation chaperone PrsA2 [PrsA2 (VF0449) - Post-translational modification (VFC0315)] [Listeria monocytogenes EGD-e]
CFSAN117572	NODE_3_length_119382_cov_38.101748	24199	26799	-	lap	1-2601/2601	100	100	vfdb	NP_465159	(lap) Listeria adhesion protein Lap [Lap (VF0444) - Adherence (VFC0001)] [Listeria monocytogenes EGD-e]
CFSAN117572	NODE_41_length_26105_cov_37.965933	19007	20392	-	hpt	1-1386/1386	100	97.83	vfdb	NP_464364	(hpt) hexose phosphate transport protein [Hpt (VF0264) - Nutritional/Metabolic factor (VFC0272)] [Listeria monocytogenes EGD-e]
CFSAN117572	NODE_44_length_23640_cov_32.038745	18651	20519	+	oatA	1-1869/1869	100	99.57	vfdb	NP_464816	(oatA) peptidoglycan O-acetyltransferase [OatA (VF0441) - Immune modulation (VFC0258)] [Listeria monocytogenes EGD-e]
CFSAN117572	NODE_44_length_23640_cov_32.038745	20553	22349	-	inlK	1-1797/1797	100	100	vfdb	NP_464815	(inlK) internalin K [InlK (VF0439) - Immune modulation (VFC0258)] [Listeria monocytogenes EGD-e]
CFSAN117572	NODE_46_length_22870_cov_42.009849	517	1917	-	pdgA	1-1401/1401	100	100	vfdb	NP_463944	(pdgA) Peptidoglycan N-deacetylase [PgdA (VF0442) - Immune modulation (VFC0258)] [Listeria monocytogenes EGD-e]
CFSAN117572	NODE_46_length_22870_cov_42.009849	7305	9770	-	inlF	1-2466/2466	100	100	vfdb	NP_463939	(inlF) internalin F [InlF (VF0447) - Adherence (VFC0001)] [Listeria monocytogenes EGD-e]
CFSAN117572	NODE_50_length_20310_cov_41.533667	845	2737	-	inlB	1-1893/1893	100	100	vfdb	NP_463963	(inlB) Internalin B [InlB (VF0070) - Invasion (VFC0083)] [Listeria monocytogenes EGD-e]
CFSAN117572	NODE_50_length_20310_cov_41.533667	2822	5224	-	inlA	1-2403/2403	100	100	vfdb	NP_463962	(inlA) Internalin A [InlA (VF0069) - Invasion (VFC0083)] [Listeria monocytogenes EGD-e]
CFSAN117572	NODE_51_length_19645_cov_51.969259	2271	4733	+	clpC	1-2463/2463	100	100	vfdb	NP_463763	(clpC) endopeptidase Clp ATP-binding chain C [ClpC (VF0072) - Stress survival (VFC0282)] [Listeria monocytogenes EGD-e]
CFSAN117572	NODE_5_length_105251_cov_47.177828	15138	17693	+	inlJ	1-2556/2556	100	100	vfdb	NP_466343	(inlJ) internalin J [InlJ (VF0445) - Adherence (VFC0001)] [Listeria monocytogenes EGD-e]
CFSAN117572	NODE_7_length_83839_cov_45.709480	6396	7286	-	inlC	1-891/891	100	100	vfdb	NP_465311	(inlC) internalin C [InlC (VF0438) - Immune modulation (VFC0258)] [Listeria monocytogenes EGD-e]
CFSAN117572	NODE_7_length_83839_cov_45.709480	50318	52030	+	fbpA	1-1713/1713	100	99.88	vfdb	NP_465354	(fbpA) fibronectin-binding protein [FbpA (VF0349) - Adherence (VFC0001)] [Listeria monocytogenes EGD-e]
CFSAN117572	NODE_7_length_83839_cov_45.709480	66602	67066	-	lspA	1-465/465	100	100	vfdb	NP_465369	(lspA) signal peptidase II [Lsp (VF0351) - Post-translational modification (VFC0315)] [Listeria monocytogenes EGD-e]
CFSAN117572	NODE_7_length_83839_cov_45.709480	69991	70923	-	lpeA	1-933/933	100	100	vfdb	NP_465372	(lpeA) lipoprotein promoting cell invasion [LpeA (VF0346) - Invasion (VFC0083)] [Listeria monocytogenes EGD-e]
CFSAN117572	NODE_8_length_80407_cov_40.744681	77453	78448	+	lplA1	1-996/996	100	100	vfdb	NP_464456	(lplA1) lipoate protein ligase [LplA1 (VF0347) - Nutritional/Metabolic factor (VFC0272)] [Listeria monocytogenes EGD-e]
CFSAN117572	NODE_9_length_74182_cov_40.081169	65703	66680	+	bsh	1-978/978	100	100	vfdb	NP_465591	(bsh) bile salt hydrolase [BSH (VF0350) - Stress survival (VFC0282)] [Listeria monocytogenes EGD-e]
CFSAN117577	NODE_11_length_74075_cov_16.453386	50487	52283	+	inlK	1-1797/1797	100	98.61	vfdb	NP_464815	(inlK) internalin K [InlK (VF0439) - Immune modulation (VFC0258)] [Listeria monocytogenes EGD-e]
CFSAN117577	NODE_11_length_74075_cov_16.453386	52317	54185	-	oatA	1-1869/1869	100	99.89	vfdb	NP_464816	(oatA) peptidoglycan O-acetyltransferase [OatA (VF0441) - Immune modulation (VFC0258)] [Listeria monocytogenes EGD-e]
CFSAN117577	NODE_13_length_59362_cov_22.873436	20329	21198	-	plcB	1-870/870	100	99.77	vfdb	NP_463736	(plcB) phospholipase C [PlcB (VF0067) - Exotoxin (VFC0235)] [Listeria monocytogenes EGD-e]
CFSAN117577	NODE_13_length_59362_cov_22.873436	23247	24779	-	mpl	1-1533/1533	100	99.22	vfdb	NP_463734	(mpl) Zinc metalloproteinase precursor [Mpl (VF0065) - Exoenzyme (VFC0251)] [Listeria monocytogenes EGD-e]
CFSAN117577	NODE_13_length_59362_cov_22.873436	25110	26699	-	hly	1-1590/1590	100	99.94	vfdb	NP_463733	(hly) listeriolysin O precursor [LLO (VF0064) - Exotoxin (VFC0235)] [Listeria monocytogenes EGD-e]
CFSAN117577	NODE_13_length_59362_cov_22.873436	26941	27894	+	plcA	1-954/954	100	98.32	vfdb	NP_463732	(plcA) phosphatidylinositol-specific phospholipase c [PlcA (VF0063) - Exotoxin (VFC0235)] [Listeria monocytogenes EGD-e]
CFSAN117577	NODE_13_length_59362_cov_22.873436	28165	28885	+	prfA	1-714/714	100	99.03	vfdb	NP_463731	(prfA) listeriolysin positive regulatory protein [PrfA (VF0062) - Regulation (VFC0301)] [Listeria monocytogenes EGD-e]
CFSAN117577	NODE_15_length_52813_cov_19.702274	31782	32663	-	prsA2	1-882/882	100	99.89	vfdb	NP_465743	(prsA2) post translocation chaperone PrsA2 [PrsA2 (VF0449) - Post-translational modification (VFC0315)] [Listeria monocytogenes EGD-e]
CFSAN117577	NODE_18_length_36226_cov_25.833624	2271	4733	+	clpC	1-2463/2463	100	99.92	vfdb	NP_463763	(clpC) endopeptidase Clp ATP-binding chain C [ClpC (VF0072) - Stress survival (VFC0282)] [Listeria monocytogenes EGD-e]
CFSAN117577	NODE_1_length_423639_cov_18.906888	70519	71904	+	hpt	1-1386/1386	100	97.69	vfdb	NP_464364	(hpt) hexose phosphate transport protein [Hpt (VF0264) - Nutritional/Metabolic factor (VFC0272)] [Listeria monocytogenes EGD-e]
CFSAN117577	NODE_1_length_423639_cov_18.906888	169975	170970	+	lplA1	1-996/996	100	98.49	vfdb	NP_464456	(lplA1) lipoate protein ligase [LplA1 (VF0347) - Nutritional/Metabolic factor (VFC0272)] [Listeria monocytogenes EGD-e]
CFSAN117577	NODE_1_length_423639_cov_18.906888	228064	230238	-	clpE	1-2175/2175	100	99.63	vfdb	NP_464522	(clpE) ATP-dependent protease [ClpE (VF0073) - Stress survival (VFC0282)] [Listeria monocytogenes EGD-e]
CFSAN117577	NODE_1_length_423639_cov_18.906888	307231	308949	+	aut	1-1719/1719	100	99.65	vfdb	NP_464601	(aut) autolysin [Auto (VF0348) - Invasion (VFC0083)] [Listeria monocytogenes EGD-e]
CFSAN117577	NODE_21_length_25983_cov_19.564975	118	741	+	hbp1/svpA	1-624/624	100	99.84	vfdb	NP_465710	(hbp1/svpA) Haemoglobin binding protein 1 [SvpA (VF0263) - Nutritional/Metabolic factor (VFC0272)] [Listeria monocytogenes EGD-e]
CFSAN117577	NODE_21_length_25983_cov_19.564975	756	2465	+	hbp2	1-1710/1710	100	99.94	vfdb	NP_465709	(hbp2) hypothetical protein [SvpA (VF0263) - Nutritional/Metabolic factor (VFC0272)] [Listeria monocytogenes EGD-e]
CFSAN117577	NODE_24_length_18146_cov_18.259448	6396	7283	-	inlC	4-891/891	99.66	99.89	vfdb	NP_465311	(inlC) internalin C [InlC (VF0438) - Immune modulation (VFC0258)] [Listeria monocytogenes EGD-e]
CFSAN117577	NODE_2_length_419011_cov_23.689148	235653	238208	+	inlJ	1-2556/2556	100	97.61	vfdb	NP_466343	(inlJ) internalin J [InlJ (VF0445) - Adherence (VFC0001)] [Listeria monocytogenes EGD-e]
CFSAN117577	NODE_3_length_376698_cov_20.630516	102965	103942	+	bsh	1-978/978	100	99.9	vfdb	NP_465591	(bsh) bile salt hydrolase [BSH (VF0350) - Stress survival (VFC0282)] [Listeria monocytogenes EGD-e]
CFSAN117577	NODE_3_length_376698_cov_20.630516	324388	325320	+	lpeA	1-933/933	100	97.53	vfdb	NP_465372	(lpeA) lipoprotein promoting cell invasion [LpeA (VF0346) - Invasion (VFC0083)] [Listeria monocytogenes EGD-e]
CFSAN117577	NODE_3_length_376698_cov_20.630516	328245	328709	+	lspA	1-465/465	100	99.78	vfdb	NP_465369	(lspA) signal peptidase II [Lsp (VF0351) - Post-translational modification (VFC0315)] [Listeria monocytogenes EGD-e]
CFSAN117577	NODE_3_length_376698_cov_20.630516	343285	344997	-	fbpA	1-1713/1713	100	95.45	vfdb	NP_465354	(fbpA) fibronectin-binding protein [FbpA (VF0349) - Adherence (VFC0001)] [Listeria monocytogenes EGD-e]
CFSAN117577	NODE_4_length_267574_cov_18.242298	28439	31039	-	lap	1-2601/2601	100	99.85	vfdb	NP_465159	(lap) Listeria adhesion protein Lap [Lap (VF0444) - Adherence (VFC0001)] [Listeria monocytogenes EGD-e]
CFSAN117577	NODE_5_length_229576_cov_19.300890	105060	106496	+	iap/cwhA	1-1449/1449	99.17	98.28	vfdb	NP_464110	(iap/cwhA) P60 extracellular protein invasion associated protein Iap [P60 (VF0068) - Invasion (VFC0083)] [Listeria monocytogenes EGD-e]
CFSAN117577	NODE_6_length_227080_cov_22.555221	47679	48116	+	gtcA	1-438/438	100	99.77	vfdb	NP_466072	(gtcA) wall teichoic acid glycosylation protein GtcA [GtcA (VF0607) - Post-translational modification (VFC0315)] [Listeria monocytogenes EGD-e]
CFSAN117577	NODE_6_length_227080_cov_22.555221	127663	128829	-	inlP	1-1167/1167	100	92.8	vfdb	NP_465993	(inlP) internalin P [InlP (VF0577) - Adherence (VFC0001)] [Listeria monocytogenes EGD-e]
CFSAN117577	NODE_6_length_227080_cov_22.555221	130486	131082	-	clpP	1-597/597	100	99.83	vfdb	NP_465991	(clpP) ATP-dependent Clp protease proteolytic subunit [ClpP (VF0074) - Stress survival (VFC0282)] [Listeria monocytogenes EGD-e]
CFSAN117577	NODE_8_length_134418_cov_19.843288	72009	74474	+	inlF	1-2466/2466	100	98.22	vfdb	NP_463939	(inlF) internalin F [InlF (VF0447) - Adherence (VFC0001)] [Listeria monocytogenes EGD-e]
CFSAN117577	NODE_8_length_134418_cov_19.843288	79862	81262	+	pdgA	1-1401/1401	100	99.71	vfdb	NP_463944	(pdgA) Peptidoglycan N-deacetylase [PgdA (VF0442) - Immune modulation (VFC0258)] [Listeria monocytogenes EGD-e]
CFSAN117577	NODE_8_length_134418_cov_19.843288	96914	99316	+	inlA	1-2403/2403	100	99.21	vfdb	NP_463962	(inlA) Internalin A [InlA (VF0069) - Invasion (VFC0083)] [Listeria monocytogenes EGD-e]
CFSAN117577	NODE_8_length_134418_cov_19.843288	99401	101293	+	inlB	1-1893/1893	100	99.37	vfdb	NP_463963	(inlB) Internalin B [InlB (VF0070) - Invasion (VFC0083)] [Listeria monocytogenes EGD-e]
CFSAN117577	NODE_8_length_134418_cov_19.843288	102965	103582	+	lntA	1-618/618	100	91.1	vfdb	NP_463967	(lntA) listeria nuclear targeted protein A [LntA (VF0440) - Immune modulation (VFC0258)] [Listeria monocytogenes EGD-e]
CFSAN117584	NODE_10_length_120311_cov_28.386383	32467	34353	+	oatA	1-1869/1869	100	93.53	vfdb	NP_464816	(oatA) peptidoglycan O-acetyltransferase [OatA (VF0441) - Immune modulation (VFC0258)] [Listeria monocytogenes EGD-e]
CFSAN117584	NODE_10_length_120311_cov_28.386383	34386	36212	-	inlK	1-1797/1797	100	89	vfdb	NP_464815	(inlK) internalin K [InlK (VF0439) - Immune modulation (VFC0258)] [Listeria monocytogenes EGD-e]
CFSAN117584	NODE_11_length_119279_cov_31.922100	113372	113989	-	lntA	1-618/618	100	96.12	vfdb	NP_463967	(lntA) listeria nuclear targeted protein A [LntA (VF0440) - Immune modulation (VFC0258)] [Listeria monocytogenes EGD-e]
CFSAN117584	NODE_11_length_119279_cov_31.922100	115691	117581	-	inlB	1-1891/1893	99.89	92.7	vfdb	NP_463963	(inlB) Internalin B [InlB (VF0070) - Invasion (VFC0083)] [Listeria monocytogenes EGD-e]
CFSAN117584	NODE_12_length_118237_cov_34.205207	12716	13972	+	vip	1-1200/1200	100	85.28	vfdb	NP_463850	(vip) surface adhesin Vip [Vip (VF0443) - Invasion (VFC0083)] [Listeria monocytogenes EGD-e]
CFSAN117584	NODE_12_length_118237_cov_34.205207	113505	115967	-	clpC	1-2463/2463	100	94.07	vfdb	NP_463763	(clpC) endopeptidase Clp ATP-binding chain C [ClpC (VF0072) - Stress survival (VFC0282)] [Listeria monocytogenes EGD-e]
CFSAN117584	NODE_13_length_111709_cov_35.174078	18483	19079	+	clpP	1-597/597	100	96.82	vfdb	NP_465991	(clpP) ATP-dependent Clp protease proteolytic subunit [ClpP (VF0074) - Stress survival (VFC0282)] [Listeria monocytogenes EGD-e]
CFSAN117584	NODE_13_length_111709_cov_35.174078	20737	21903	+	inlP	1-1167/1167	100	95.2	vfdb	NP_465993	(inlP) internalin P [InlP (VF0577) - Adherence (VFC0001)] [Listeria monocytogenes EGD-e]
CFSAN117584	NODE_13_length_111709_cov_35.174078	101451	101888	-	gtcA	1-438/438	99.54	80.45	vfdb	NP_466072	(gtcA) wall teichoic acid glycosylation protein GtcA [GtcA (VF0607) - Post-translational modification (VFC0315)] [Listeria monocytogenes EGD-e]
CFSAN117584	NODE_14_length_101102_cov_29.968566	78585	80012	+	iap/cwhA	1-1449/1449	98.34	95.25	vfdb	NP_464110	(iap/cwhA) P60 extracellular protein invasion associated protein Iap [P60 (VF0068) - Invasion (VFC0083)] [Listeria monocytogenes EGD-e]
CFSAN117584	NODE_18_length_60285_cov_34.184980	8489	10201	-	fbpA	1-1713/1713	100	91.65	vfdb	NP_465354	(fbpA) fibronectin-binding protein [FbpA (VF0349) - Adherence (VFC0001)] [Listeria monocytogenes EGD-e]
CFSAN117584	NODE_18_length_60285_cov_34.184980	52967	53857	+	inlC	1-891/891	100	97.19	vfdb	NP_465311	(inlC) internalin C [InlC (VF0438) - Immune modulation (VFC0258)] [Listeria monocytogenes EGD-e]
CFSAN117584	NODE_1_length_333676_cov_30.430174	264726	267326	+	lap	1-2601/2601	100	97.19	vfdb	NP_465159	(lap) Listeria adhesion protein Lap [Lap (VF0444) - Adherence (VFC0001)] [Listeria monocytogenes EGD-e]
CFSAN117584	NODE_1_length_333676_cov_30.430174	307179	312317	-	lapB	1-5136/5136	100	93.29	vfdb	NP_465191	(lapB) Listeria adhesion protein LapB [LapB (VF0446) - Adherence (VFC0001)] [Listeria monocytogenes EGD-e]
CFSAN117584	NODE_20_length_52836_cov_21.031266	17977	18564	-	llsP	1-588/588	100	93.71	vfdb	AHK25023	(llsP) CAAX amino terminal protease LlsP [LLS (VF0410) - Exotoxin (VFC0235)] [Listeria innocua SLCC6294]
CFSAN117584	NODE_20_length_52836_cov_21.031266	18557	19870	-	llsD	1-1314/1314	100	98.1	vfdb	AHK25022	(llsD) streptolysin-associated protein LlsD [LLS (VF0410) - Exotoxin (VFC0235)] [Listeria innocua SLCC6294]
CFSAN117584	NODE_20_length_52836_cov_21.031266	19863	20780	-	llsY	1-918/918	100	96.19	vfdb	AHK25021	(llsY) LlsY [LLS (VF0410) - Exotoxin (VFC0235)] [Listeria innocua SLCC6294]
CFSAN117584	NODE_20_length_52836_cov_21.031266	20788	21663	-	llsB	1-876/876	100	97.37	vfdb	AHK25020	(llsB) SagB family dehydrogenase LlsB [LLS (VF0410) - Exotoxin (VFC0235)] [Listeria innocua SLCC6294]
CFSAN117584	NODE_20_length_52836_cov_21.031266	21660	21977	-	llsX	1-318/318	100	97.17	vfdb	AHK25019	(llsX) LlsX [LLS (VF0410) - Exotoxin (VFC0235)] [Listeria innocua SLCC6294]
CFSAN117584	NODE_20_length_52836_cov_21.031266	22018	22767	-	llsH	1-750/750	100	97.47	vfdb	AHK25018	(llsH) ABC transporter permease protein LlsH [LLS (VF0410) - Exotoxin (VFC0235)] [Listeria innocua SLCC6294]
CFSAN117584	NODE_20_length_52836_cov_21.031266	22767	23654	-	llsG	1-888/888	100	97.3	vfdb	AHK25017	(llsG) ABC transporter ATP-binding protein LlsG [LLS (VF0410) - Exotoxin (VFC0235)] [Listeria innocua SLCC6294]
CFSAN117584	NODE_20_length_52836_cov_21.031266	23719	23868	-	llsA	1-150/150	100	98	vfdb	AHK25016	(llsA) listeriolysin S [LLS (VF0410) - Exotoxin (VFC0235)] [Listeria innocua SLCC6294]
CFSAN117584	NODE_24_length_39992_cov_29.086241	17014	18723	-	hbp2	1-1710/1710	100	93.51	vfdb	NP_465709	(hbp2) hypothetical protein [SvpA (VF0263) - Nutritional/Metabolic factor (VFC0272)] [Listeria monocytogenes EGD-e]
CFSAN117584	NODE_24_length_39992_cov_29.086241	18736	19362	-	hbp1/svpA	1-624/624	100	90.27	vfdb	NP_465710	(hbp1/svpA) Haemoglobin binding protein 1 [SvpA (VF0263) - Nutritional/Metabolic factor (VFC0272)] [Listeria monocytogenes EGD-e]
CFSAN117584	NODE_25_length_38611_cov_29.823459	31220	32620	-	pdgA	1-1401/1401	100	97	vfdb	NP_463944	(pdgA) Peptidoglycan N-deacetylase [PgdA (VF0442) - Immune modulation (VFC0258)] [Listeria monocytogenes EGD-e]
CFSAN117584	NODE_26_length_32782_cov_35.900230	25119	25987	-	plcB	2-870/870	99.89	95.51	vfdb	NP_463736	(plcB) phospholipase C [PlcB (VF0067) - Exotoxin (VFC0235)] [Listeria monocytogenes EGD-e]
CFSAN117584	NODE_26_length_32782_cov_35.900230	28038	29570	-	mpl	1-1533/1533	100	94.85	vfdb	NP_463734	(mpl) Zinc metalloproteinase precursor [Mpl (VF0065) - Exoenzyme (VFC0251)] [Listeria monocytogenes EGD-e]
CFSAN117584	NODE_26_length_32782_cov_35.900230	29901	31490	-	hly	1-1590/1590	100	97.3	vfdb	NP_463733	(hly) listeriolysin O precursor [LLO (VF0064) - Exotoxin (VFC0235)] [Listeria monocytogenes EGD-e]
CFSAN117584	NODE_26_length_32782_cov_35.900230	31733	32686	+	plcA	1-954/954	100	97.38	vfdb	NP_463732	(plcA) phosphatidylinositol-specific phospholipase c [PlcA (VF0063) - Exotoxin (VFC0235)] [Listeria monocytogenes EGD-e]
CFSAN117584	NODE_2_length_311676_cov_33.515444	6185	6649	-	lspA	1-465/465	100	97.42	vfdb	NP_465369	(lspA) signal peptidase II [Lsp (VF0351) - Post-translational modification (VFC0315)] [Listeria monocytogenes EGD-e]
CFSAN117584	NODE_2_length_311676_cov_33.515444	9574	10506	-	lpeA	1-933/933	100	96.78	vfdb	NP_465372	(lpeA) lipoprotein promoting cell invasion [LpeA (VF0346) - Invasion (VFC0083)] [Listeria monocytogenes EGD-e]
CFSAN117584	NODE_2_length_311676_cov_33.515444	241339	242316	-	bsh	1-978/978	100	97.75	vfdb	NP_465591	(bsh) bile salt hydrolase [BSH (VF0350) - Stress survival (VFC0282)] [Listeria monocytogenes EGD-e]
CFSAN117584	NODE_3_length_283894_cov_31.328097	163100	164485	+	hpt	1-1386/1386	100	97.62	vfdb	NP_464364	(hpt) hexose phosphate transport protein [Hpt (VF0264) - Nutritional/Metabolic factor (VFC0272)] [Listeria monocytogenes EGD-e]
CFSAN117584	NODE_5_length_145062_cov_29.271453	15679	16674	+	lplA1	1-996/996	100	92.77	vfdb	NP_464456	(lplA1) lipoate protein ligase [LplA1 (VF0347) - Nutritional/Metabolic factor (VFC0272)] [Listeria monocytogenes EGD-e]
CFSAN117584	NODE_5_length_145062_cov_29.271453	74708	76876	-	clpE	1-2175/2175	99.72	93.47	vfdb	NP_464522	(clpE) ATP-dependent protease [ClpE (VF0073) - Stress survival (VFC0282)] [Listeria monocytogenes EGD-e]
CFSAN117584	NODE_6_length_141152_cov_29.976018	128695	129576	-	prsA2	1-882/882	100	96.48	vfdb	NP_465743	(prsA2) post translocation chaperone PrsA2 [PrsA2 (VF0449) - Post-translational modification (VFC0315)] [Listeria monocytogenes EGD-e]
CFSAN117584	NODE_7_length_126697_cov_32.270562	108	821	+	prfA	1-714/714	100	97.62	vfdb	NP_463731	(prfA) listeriolysin positive regulatory protein [PrfA (VF0062) - Regulation (VFC0301)] [Listeria monocytogenes EGD-e]
CFSAN117588	NODE_11_length_87184_cov_44.889096	2271	4733	+	clpC	1-2463/2463	100	100	vfdb	NP_463763	(clpC) endopeptidase Clp ATP-binding chain C [ClpC (VF0072) - Stress survival (VFC0282)] [Listeria monocytogenes EGD-e]
CFSAN117588	NODE_13_length_64254_cov_45.339077	25112	25981	-	plcB	1-870/870	100	100	vfdb	NP_463736	(plcB) phospholipase C [PlcB (VF0067) - Exotoxin (VFC0235)] [Listeria monocytogenes EGD-e]
CFSAN117588	NODE_13_length_64254_cov_45.339077	26017	27936	-	actA	1-1920/1920	100	100	vfdb	NP_463735	(actA) actin-assembly inducing protein precursor [ActA (VF0066) - Motility (VFC0204)] [Listeria monocytogenes EGD-e]
CFSAN117588	NODE_13_length_64254_cov_45.339077	28135	29667	-	mpl	1-1533/1533	100	99.94	vfdb	NP_463734	(mpl) Zinc metalloproteinase precursor [Mpl (VF0065) - Exoenzyme (VFC0251)] [Listeria monocytogenes EGD-e]
CFSAN117588	NODE_13_length_64254_cov_45.339077	29998	31587	-	hly	1-1590/1590	100	100	vfdb	NP_463733	(hly) listeriolysin O precursor [LLO (VF0064) - Exotoxin (VFC0235)] [Listeria monocytogenes EGD-e]
CFSAN117588	NODE_13_length_64254_cov_45.339077	31829	32782	+	plcA	1-954/954	100	100	vfdb	NP_463732	(plcA) phosphatidylinositol-specific phospholipase c [PlcA (VF0063) - Exotoxin (VFC0235)] [Listeria monocytogenes EGD-e]
CFSAN117588	NODE_13_length_64254_cov_45.339077	33053	33766	+	prfA	1-714/714	100	100	vfdb	NP_463731	(prfA) listeriolysin positive regulatory protein [PrfA (VF0062) - Regulation (VFC0301)] [Listeria monocytogenes EGD-e]
CFSAN117588	NODE_1_length_542863_cov_40.434053	6793	7683	-	inlC	1-891/891	100	100	vfdb	NP_465311	(inlC) internalin C [InlC (VF0438) - Immune modulation (VFC0258)] [Listeria monocytogenes EGD-e]
CFSAN117588	NODE_1_length_542863_cov_40.434053	50715	52427	+	fbpA	1-1713/1713	100	99.88	vfdb	NP_465354	(fbpA) fibronectin-binding protein [FbpA (VF0349) - Adherence (VFC0001)] [Listeria monocytogenes EGD-e]
CFSAN117588	NODE_1_length_542863_cov_40.434053	66999	67463	-	lspA	1-465/465	100	100	vfdb	NP_465369	(lspA) signal peptidase II [Lsp (VF0351) - Post-translational modification (VFC0315)] [Listeria monocytogenes EGD-e]
CFSAN117588	NODE_1_length_542863_cov_40.434053	70388	71320	-	lpeA	1-933/933	100	100	vfdb	NP_465372	(lpeA) lipoprotein promoting cell invasion [LpeA (VF0346) - Invasion (VFC0083)] [Listeria monocytogenes EGD-e]
CFSAN117588	NODE_1_length_542863_cov_40.434053	293013	293990	-	bsh	1-978/978	100	100	vfdb	NP_465591	(bsh) bile salt hydrolase [BSH (VF0350) - Stress survival (VFC0282)] [Listeria monocytogenes EGD-e]
CFSAN117588	NODE_1_length_542863_cov_40.434053	418965	420674	-	hbp2	1-1710/1710	100	100	vfdb	NP_465709	(hbp2) hypothetical protein [SvpA (VF0263) - Nutritional/Metabolic factor (VFC0272)] [Listeria monocytogenes EGD-e]
CFSAN117588	NODE_1_length_542863_cov_40.434053	420689	421312	-	hbp1/svpA	1-624/624	100	100	vfdb	NP_465710	(hbp1/svpA) Haemoglobin binding protein 1 [SvpA (VF0263) - Nutritional/Metabolic factor (VFC0272)] [Listeria monocytogenes EGD-e]
CFSAN117588	NODE_1_length_542863_cov_40.434053	453395	454276	+	prsA2	1-882/882	100	100	vfdb	NP_465743	(prsA2) post translocation chaperone PrsA2 [PrsA2 (VF0449) - Post-translational modification (VFC0315)] [Listeria monocytogenes EGD-e]
CFSAN117588	NODE_2_length_424607_cov_44.079104	193618	196173	-	inlJ	1-2556/2556	100	100	vfdb	NP_466343	(inlJ) internalin J [InlJ (VF0445) - Adherence (VFC0001)] [Listeria monocytogenes EGD-e]
CFSAN117588	NODE_3_length_277140_cov_36.043684	25909	27626	-	aut	1-1719/1719	99.94	99.83	vfdb	NP_464601	(aut) autolysin [Auto (VF0348) - Invasion (VFC0083)] [Listeria monocytogenes EGD-e]
CFSAN117588	NODE_3_length_277140_cov_36.043684	104622	106796	+	clpE	1-2175/2175	100	100	vfdb	NP_464522	(clpE) ATP-dependent protease [ClpE (VF0073) - Stress survival (VFC0282)] [Listeria monocytogenes EGD-e]
CFSAN117588	NODE_3_length_277140_cov_36.043684	163890	164885	-	lplA1	1-996/996	100	100	vfdb	NP_464456	(lplA1) lipoate protein ligase [LplA1 (VF0347) - Nutritional/Metabolic factor (VFC0272)] [Listeria monocytogenes EGD-e]
CFSAN117588	NODE_3_length_277140_cov_36.043684	262159	263544	-	hpt	1-1386/1386	100	97.83	vfdb	NP_464364	(hpt) hexose phosphate transport protein [Hpt (VF0264) - Nutritional/Metabolic factor (VFC0272)] [Listeria monocytogenes EGD-e]
CFSAN117588	NODE_4_length_263416_cov_38.346368	59109	60551	+	iap/cwhA	1-1449/1449	99.59	99.59	vfdb	NP_464110	(iap/cwhA) P60 extracellular protein invasion associated protein Iap [P60 (VF0068) - Invasion (VFC0083)] [Listeria monocytogenes EGD-e]
CFSAN117588	NODE_4_length_263416_cov_38.346368	211272	211889	-	lntA	1-618/618	100	99.68	vfdb	NP_463967	(lntA) listeria nuclear targeted protein A [LntA (VF0440) - Immune modulation (VFC0258)] [Listeria monocytogenes EGD-e]
CFSAN117588	NODE_4_length_263416_cov_38.346368	220494	222386	-	inlB	1-1893/1893	100	100	vfdb	NP_463963	(inlB) Internalin B [InlB (VF0070) - Invasion (VFC0083)] [Listeria monocytogenes EGD-e]
CFSAN117588	NODE_4_length_263416_cov_38.346368	222471	224873	-	inlA	1-2403/2403	100	100	vfdb	NP_463962	(inlA) Internalin A [InlA (VF0069) - Invasion (VFC0083)] [Listeria monocytogenes EGD-e]
CFSAN117588	NODE_4_length_263416_cov_38.346368	240525	241925	-	pdgA	1-1401/1401	100	100	vfdb	NP_463944	(pdgA) Peptidoglycan N-deacetylase [PgdA (VF0442) - Immune modulation (VFC0258)] [Listeria monocytogenes EGD-e]
CFSAN117588	NODE_4_length_263416_cov_38.346368	247313	249778	-	inlF	1-2466/2466	100	100	vfdb	NP_463939	(inlF) internalin F [InlF (VF0447) - Adherence (VFC0001)] [Listeria monocytogenes EGD-e]
CFSAN117588	NODE_5_length_259414_cov_34.444338	49074	50870	+	inlK	1-1797/1797	100	100	vfdb	NP_464815	(inlK) internalin K [InlK (VF0439) - Immune modulation (VFC0258)] [Listeria monocytogenes EGD-e]
CFSAN117588	NODE_5_length_259414_cov_34.444338	50904	52772	-	oatA	1-1869/1869	100	99.57	vfdb	NP_464816	(oatA) peptidoglycan O-acetyltransferase [OatA (VF0441) - Immune modulation (VFC0258)] [Listeria monocytogenes EGD-e]
CFSAN117588	NODE_6_length_232447_cov_43.800702	101577	102173	+	clpP	1-597/597	100	100	vfdb	NP_465991	(clpP) ATP-dependent Clp protease proteolytic subunit [ClpP (VF0074) - Stress survival (VFC0282)] [Listeria monocytogenes EGD-e]
CFSAN117588	NODE_6_length_232447_cov_43.800702	103828	104994	+	inlP	1-1167/1167	100	99.14	vfdb	NP_465993	(inlP) internalin P [InlP (VF0577) - Adherence (VFC0001)] [Listeria monocytogenes EGD-e]
CFSAN117588	NODE_6_length_232447_cov_43.800702	184542	184979	-	gtcA	1-438/438	100	100	vfdb	NP_466072	(gtcA) wall teichoic acid glycosylation protein GtcA [GtcA (VF0607) - Post-translational modification (VFC0315)] [Listeria monocytogenes EGD-e]
CFSAN117588	NODE_6_length_232447_cov_43.800702	194729	197482	+	ami	1-2754/2754	100	99.27	vfdb	NP_466081	(ami) autolysin amidase adhesin [Ami (VF0071) - Adherence (VFC0001)] [Listeria monocytogenes EGD-e]
CFSAN117588	NODE_7_length_217173_cov_36.684933	20691	25826	+	lapB	1-5136/5136	100	98.87	vfdb	NP_465191	(lapB) Listeria adhesion protein LapB [LapB (VF0446) - Adherence (VFC0001)] [Listeria monocytogenes EGD-e]
CFSAN117588	NODE_7_length_217173_cov_36.684933	63011	65611	-	lap	1-2601/2601	100	100	vfdb	NP_465159	(lap) Listeria adhesion protein Lap [Lap (VF0444) - Adherence (VFC0001)] [Listeria monocytogenes EGD-e]
CFSAN119105	NODE_10_length_109010_cov_34.251922	68051	69028	+	bsh	1-978/978	100	97.75	vfdb	NP_465591	(bsh) bile salt hydrolase [BSH (VF0350) - Stress survival (VFC0282)] [Listeria monocytogenes EGD-e]
CFSAN119105	NODE_12_length_85189_cov_36.920117	25325	26193	-	plcB	2-870/870	99.89	95.51	vfdb	NP_463736	(plcB) phospholipase C [PlcB (VF0067) - Exotoxin (VFC0235)] [Listeria monocytogenes EGD-e]
CFSAN119105	NODE_12_length_85189_cov_36.920117	26232	28149	-	actA	1-1918/1920	99.9	94.06	vfdb	NP_463735	(actA) actin-assembly inducing protein precursor [ActA (VF0066) - Motility (VFC0204)] [Listeria monocytogenes EGD-e]
CFSAN119105	NODE_12_length_85189_cov_36.920117	28349	29881	-	mpl	1-1533/1533	100	94.78	vfdb	NP_463734	(mpl) Zinc metalloproteinase precursor [Mpl (VF0065) - Exoenzyme (VFC0251)] [Listeria monocytogenes EGD-e]
CFSAN119105	NODE_12_length_85189_cov_36.920117	30216	31805	-	hly	1-1590/1590	100	97.17	vfdb	NP_463733	(hly) listeriolysin O precursor [LLO (VF0064) - Exotoxin (VFC0235)] [Listeria monocytogenes EGD-e]
CFSAN119105	NODE_12_length_85189_cov_36.920117	32048	33001	+	plcA	1-954/954	100	97.59	vfdb	NP_463732	(plcA) phosphatidylinositol-specific phospholipase c [PlcA (VF0063) - Exotoxin (VFC0235)] [Listeria monocytogenes EGD-e]
CFSAN119105	NODE_12_length_85189_cov_36.920117	33274	33987	+	prfA	1-714/714	100	97.48	vfdb	NP_463731	(prfA) listeriolysin positive regulatory protein [PrfA (VF0062) - Regulation (VFC0301)] [Listeria monocytogenes EGD-e]
CFSAN119105	NODE_17_length_75997_cov_30.391868	11719	12345	+	hbp1/svpA	1-624/624	100	90.27	vfdb	NP_465710	(hbp1/svpA) Haemoglobin binding protein 1 [SvpA (VF0263) - Nutritional/Metabolic factor (VFC0272)] [Listeria monocytogenes EGD-e]
CFSAN119105	NODE_17_length_75997_cov_30.391868	12358	14082	+	hbp2	1-1710/1710	100	92.75	vfdb	NP_465709	(hbp2) hypothetical protein [SvpA (VF0263) - Nutritional/Metabolic factor (VFC0272)] [Listeria monocytogenes EGD-e]
CFSAN119105	NODE_18_length_74946_cov_27.612692	43952	45670	+	aut	1-1719/1719	100	96.97	vfdb	NP_464601	(aut) autolysin [Auto (VF0348) - Invasion (VFC0083)] [Listeria monocytogenes EGD-e]
CFSAN119105	NODE_18_length_74946_cov_27.612692	70604	70753	+	llsA	1-150/150	100	97.33	vfdb	AHK25016	(llsA) listeriolysin S [LLS (VF0410) - Exotoxin (VFC0235)] [Listeria innocua SLCC6294]
CFSAN119105	NODE_18_length_74946_cov_27.612692	70818	71705	+	llsG	1-888/888	100	97.64	vfdb	AHK25017	(llsG) ABC transporter ATP-binding protein LlsG [LLS (VF0410) - Exotoxin (VFC0235)] [Listeria innocua SLCC6294]
CFSAN119105	NODE_18_length_74946_cov_27.612692	71705	72454	+	llsH	1-750/750	100	97.07	vfdb	AHK25018	(llsH) ABC transporter permease protein LlsH [LLS (VF0410) - Exotoxin (VFC0235)] [Listeria innocua SLCC6294]
CFSAN119105	NODE_18_length_74946_cov_27.612692	72495	72812	+	llsX	1-318/318	100	97.17	vfdb	AHK25019	(llsX) LlsX [LLS (VF0410) - Exotoxin (VFC0235)] [Listeria innocua SLCC6294]
CFSAN119105	NODE_18_length_74946_cov_27.612692	72809	73684	+	llsB	1-876/876	100	97.49	vfdb	AHK25020	(llsB) SagB family dehydrogenase LlsB [LLS (VF0410) - Exotoxin (VFC0235)] [Listeria innocua SLCC6294]
CFSAN119105	NODE_18_length_74946_cov_27.612692	73692	74609	+	llsY	1-918/918	100	96.3	vfdb	AHK25021	(llsY) LlsY [LLS (VF0410) - Exotoxin (VFC0235)] [Listeria innocua SLCC6294]
CFSAN119105	NODE_1_length_252586_cov_37.411817	6431	7321	-	inlC	1-891/891	100	97.08	vfdb	NP_465311	(inlC) internalin C [InlC (VF0438) - Immune modulation (VFC0258)] [Listeria monocytogenes EGD-e]
CFSAN119105	NODE_1_length_252586_cov_37.411817	48613	50325	+	fbpA	1-1713/1713	100	91.77	vfdb	NP_465354	(fbpA) fibronectin-binding protein [FbpA (VF0349) - Adherence (VFC0001)] [Listeria monocytogenes EGD-e]
CFSAN119105	NODE_1_length_252586_cov_37.411817	64895	65359	-	lspA	1-465/465	100	97.42	vfdb	NP_465369	(lspA) signal peptidase II [Lsp (VF0351) - Post-translational modification (VFC0315)] [Listeria monocytogenes EGD-e]
CFSAN119105	NODE_1_length_252586_cov_37.411817	68284	69216	-	lpeA	1-933/933	100	96.89	vfdb	NP_465372	(lpeA) lipoprotein promoting cell invasion [LpeA (VF0346) - Invasion (VFC0083)] [Listeria monocytogenes EGD-e]
CFSAN119105	NODE_26_length_41278_cov_39.447255	36546	39008	-	clpC	1-2463/2463	100	94.07	vfdb	NP_463763	(clpC) endopeptidase Clp ATP-binding chain C [ClpC (VF0072) - Stress survival (VFC0282)] [Listeria monocytogenes EGD-e]
CFSAN119105	NODE_27_length_33730_cov_38.672113	19285	24423	+	lapB	1-5136/5136	100	93.36	vfdb	NP_465191	(lapB) Listeria adhesion protein LapB [LapB (VF0446) - Adherence (VFC0001)] [Listeria monocytogenes EGD-e]
CFSAN119105	NODE_2_length_247968_cov_31.880306	59751	61136	+	hpt	1-1386/1386	100	97.83	vfdb	NP_464364	(hpt) hexose phosphate transport protein [Hpt (VF0264) - Nutritional/Metabolic factor (VFC0272)] [Listeria monocytogenes EGD-e]
CFSAN119105	NODE_2_length_247968_cov_31.880306	159121	160116	+	lplA1	1-996/996	100	92.87	vfdb	NP_464456	(lplA1) lipoate protein ligase [LplA1 (VF0347) - Nutritional/Metabolic factor (VFC0272)] [Listeria monocytogenes EGD-e]
CFSAN119105	NODE_2_length_247968_cov_31.880306	217213	219381	-	clpE	1-2175/2175	99.72	93.61	vfdb	NP_464522	(clpE) ATP-dependent protease [ClpE (VF0073) - Stress survival (VFC0282)] [Listeria monocytogenes EGD-e]
CFSAN119105	NODE_4_length_185059_cov_33.099885	151905	154505	+	lap	1-2601/2601	100	97.23	vfdb	NP_465159	(lap) Listeria adhesion protein Lap [Lap (VF0444) - Adherence (VFC0001)] [Listeria monocytogenes EGD-e]
CFSAN119105	NODE_5_length_173485_cov_30.425264	49313	51091	+	inlK	1-1797/1797	99	89.48	vfdb	NP_464815	(inlK) internalin K [InlK (VF0439) - Immune modulation (VFC0258)] [Listeria monocytogenes EGD-e]
CFSAN119105	NODE_5_length_173485_cov_30.425264	51124	53010	-	oatA	1-1869/1869	100	93.59	vfdb	NP_464816	(oatA) peptidoglycan O-acetyltransferase [OatA (VF0441) - Immune modulation (VFC0258)] [Listeria monocytogenes EGD-e]
CFSAN119105	NODE_6_length_169805_cov_32.237768	107467	108906	-	iap/cwhA	1-1449/1449	99.17	96.14	vfdb	NP_464110	(iap/cwhA) P60 extracellular protein invasion associated protein Iap [P60 (VF0068) - Invasion (VFC0083)] [Listeria monocytogenes EGD-e]
CFSAN119105	NODE_7_length_158370_cov_32.898258	36557	37179	-	lntA	2-618/618	99.68	88.14	vfdb	NP_463967	(lntA) listeria nuclear targeted protein A [LntA (VF0440) - Immune modulation (VFC0258)] [Listeria monocytogenes EGD-e]
CFSAN119105	NODE_7_length_158370_cov_32.898258	39599	41489	-	inlB	1-1891/1893	99.89	95.08	vfdb	NP_463963	(inlB) Internalin B [InlB (VF0070) - Invasion (VFC0083)] [Listeria monocytogenes EGD-e]
CFSAN119105	NODE_7_length_158370_cov_32.898258	41574	43976	-	inlA	1-2403/2403	100	96.46	vfdb	NP_463962	(inlA) Internalin A [InlA (VF0069) - Invasion (VFC0083)] [Listeria monocytogenes EGD-e]
CFSAN119105	NODE_7_length_158370_cov_32.898258	57187	58587	-	pdgA	1-1401/1401	100	97	vfdb	NP_463944	(pdgA) Peptidoglycan N-deacetylase [PgdA (VF0442) - Immune modulation (VFC0258)] [Listeria monocytogenes EGD-e]
CFSAN119105	NODE_7_length_158370_cov_32.898258	63973	66444	-	inlF	1-2466/2466	99.96	80.91	vfdb	NP_463939	(inlF) internalin F [InlF (VF0447) - Adherence (VFC0001)] [Listeria monocytogenes EGD-e]
CFSAN119105	NODE_7_length_158370_cov_32.898258	150922	152166	+	vip	1-1200/1200	100	86.19	vfdb	NP_463850	(vip) surface adhesin Vip [Vip (VF0443) - Invasion (VFC0083)] [Listeria monocytogenes EGD-e]
CFSAN119105	NODE_8_length_146062_cov_36.426697	30454	33207	-	ami	1-2754/2754	100	97.86	vfdb	NP_466081	(ami) autolysin amidase adhesin [Ami (VF0071) - Adherence (VFC0001)] [Listeria monocytogenes EGD-e]
CFSAN119105	NODE_8_length_146062_cov_36.426697	42955	43392	+	gtcA	1-438/438	100	98.4	vfdb	NP_466072	(gtcA) wall teichoic acid glycosylation protein GtcA [GtcA (VF0607) - Post-translational modification (VFC0315)] [Listeria monocytogenes EGD-e]
CFSAN119105	NODE_8_length_146062_cov_36.426697	122940	124106	-	inlP	1-1167/1167	100	95.37	vfdb	NP_465993	(inlP) internalin P [InlP (VF0577) - Adherence (VFC0001)] [Listeria monocytogenes EGD-e]
CFSAN119105	NODE_8_length_146062_cov_36.426697	125763	126359	-	clpP	1-597/597	100	96.82	vfdb	NP_465991	(clpP) ATP-dependent Clp protease proteolytic subunit [ClpP (VF0074) - Stress survival (VFC0282)] [Listeria monocytogenes EGD-e]
CFSAN119105	NODE_9_length_110377_cov_32.548181	89200	90081	-	prsA2	1-882/882	100	96.14	vfdb	NP_465743	(prsA2) post translocation chaperone PrsA2 [PrsA2 (VF0449) - Post-translational modification (VFC0315)] [Listeria monocytogenes EGD-e]
CFSAN119106	NODE_10_length_87022_cov_30.596617	82257	84719	-	clpC	1-2463/2463	100	100	vfdb	NP_463763	(clpC) endopeptidase Clp ATP-binding chain C [ClpC (VF0072) - Stress survival (VFC0282)] [Listeria monocytogenes EGD-e]
CFSAN119106	NODE_14_length_64254_cov_31.834454	25112	25981	-	plcB	1-870/870	100	100	vfdb	NP_463736	(plcB) phospholipase C [PlcB (VF0067) - Exotoxin (VFC0235)] [Listeria monocytogenes EGD-e]
CFSAN119106	NODE_14_length_64254_cov_31.834454	26017	27936	-	actA	1-1920/1920	100	100	vfdb	NP_463735	(actA) actin-assembly inducing protein precursor [ActA (VF0066) - Motility (VFC0204)] [Listeria monocytogenes EGD-e]
CFSAN119106	NODE_14_length_64254_cov_31.834454	28135	29667	-	mpl	1-1533/1533	100	99.94	vfdb	NP_463734	(mpl) Zinc metalloproteinase precursor [Mpl (VF0065) - Exoenzyme (VFC0251)] [Listeria monocytogenes EGD-e]
CFSAN119106	NODE_14_length_64254_cov_31.834454	29998	31587	-	hly	1-1590/1590	100	100	vfdb	NP_463733	(hly) listeriolysin O precursor [LLO (VF0064) - Exotoxin (VFC0235)] [Listeria monocytogenes EGD-e]
CFSAN119106	NODE_14_length_64254_cov_31.834454	31829	32782	+	plcA	1-954/954	100	100	vfdb	NP_463732	(plcA) phosphatidylinositol-specific phospholipase c [PlcA (VF0063) - Exotoxin (VFC0235)] [Listeria monocytogenes EGD-e]
CFSAN119106	NODE_14_length_64254_cov_31.834454	33053	33766	+	prfA	1-714/714	100	100	vfdb	NP_463731	(prfA) listeriolysin positive regulatory protein [PrfA (VF0062) - Regulation (VFC0301)] [Listeria monocytogenes EGD-e]
CFSAN119106	NODE_1_length_435771_cov_27.640383	13090	15555	+	inlF	1-2466/2466	100	100	vfdb	NP_463939	(inlF) internalin F [InlF (VF0447) - Adherence (VFC0001)] [Listeria monocytogenes EGD-e]
CFSAN119106	NODE_1_length_435771_cov_27.640383	20943	22343	+	pdgA	1-1401/1401	100	100	vfdb	NP_463944	(pdgA) Peptidoglycan N-deacetylase [PgdA (VF0442) - Immune modulation (VFC0258)] [Listeria monocytogenes EGD-e]
CFSAN119106	NODE_1_length_435771_cov_27.640383	37995	40397	+	inlA	1-2403/2403	100	100	vfdb	NP_463962	(inlA) Internalin A [InlA (VF0069) - Invasion (VFC0083)] [Listeria monocytogenes EGD-e]
CFSAN119106	NODE_1_length_435771_cov_27.640383	40482	42374	+	inlB	1-1893/1893	100	100	vfdb	NP_463963	(inlB) Internalin B [InlB (VF0070) - Invasion (VFC0083)] [Listeria monocytogenes EGD-e]
CFSAN119106	NODE_1_length_435771_cov_27.640383	50979	51596	+	lntA	1-618/618	100	99.68	vfdb	NP_463967	(lntA) listeria nuclear targeted protein A [LntA (VF0440) - Immune modulation (VFC0258)] [Listeria monocytogenes EGD-e]
CFSAN119106	NODE_1_length_435771_cov_27.640383	202317	203759	-	iap/cwhA	1-1449/1449	99.59	99.59	vfdb	NP_464110	(iap/cwhA) P60 extracellular protein invasion associated protein Iap [P60 (VF0068) - Invasion (VFC0083)] [Listeria monocytogenes EGD-e]
CFSAN119106	NODE_2_length_410377_cov_31.098667	179293	181848	-	inlJ	1-2556/2556	100	100	vfdb	NP_466343	(inlJ) internalin J [InlJ (VF0445) - Adherence (VFC0001)] [Listeria monocytogenes EGD-e]
CFSAN119106	NODE_3_length_362155_cov_28.968980	6793	7683	-	inlC	1-891/891	100	100	vfdb	NP_465311	(inlC) internalin C [InlC (VF0438) - Immune modulation (VFC0258)] [Listeria monocytogenes EGD-e]
CFSAN119106	NODE_3_length_362155_cov_28.968980	50715	52427	+	fbpA	1-1713/1713	100	99.88	vfdb	NP_465354	(fbpA) fibronectin-binding protein [FbpA (VF0349) - Adherence (VFC0001)] [Listeria monocytogenes EGD-e]
CFSAN119106	NODE_3_length_362155_cov_28.968980	66999	67463	-	lspA	1-465/465	100	100	vfdb	NP_465369	(lspA) signal peptidase II [Lsp (VF0351) - Post-translational modification (VFC0315)] [Listeria monocytogenes EGD-e]
CFSAN119106	NODE_3_length_362155_cov_28.968980	70388	71320	-	lpeA	1-933/933	100	100	vfdb	NP_465372	(lpeA) lipoprotein promoting cell invasion [LpeA (VF0346) - Invasion (VFC0083)] [Listeria monocytogenes EGD-e]
CFSAN119106	NODE_3_length_362155_cov_28.968980	293013	293990	-	bsh	1-978/978	100	100	vfdb	NP_465591	(bsh) bile salt hydrolase [BSH (VF0350) - Stress survival (VFC0282)] [Listeria monocytogenes EGD-e]
CFSAN119106	NODE_4_length_333051_cov_26.712712	206643	208511	+	oatA	1-1869/1869	100	99.57	vfdb	NP_464816	(oatA) peptidoglycan O-acetyltransferase [OatA (VF0441) - Immune modulation (VFC0258)] [Listeria monocytogenes EGD-e]
CFSAN119106	NODE_4_length_333051_cov_26.712712	208545	210341	-	inlK	1-1797/1797	100	100	vfdb	NP_464815	(inlK) internalin K [InlK (VF0439) - Immune modulation (VFC0258)] [Listeria monocytogenes EGD-e]
CFSAN119106	NODE_5_length_277163_cov_26.673580	25931	27648	-	aut	1-1719/1719	99.94	99.83	vfdb	NP_464601	(aut) autolysin [Auto (VF0348) - Invasion (VFC0083)] [Listeria monocytogenes EGD-e]
CFSAN119106	NODE_5_length_277163_cov_26.673580	104644	106818	+	clpE	1-2175/2175	100	100	vfdb	NP_464522	(clpE) ATP-dependent protease [ClpE (VF0073) - Stress survival (VFC0282)] [Listeria monocytogenes EGD-e]
CFSAN119106	NODE_5_length_277163_cov_26.673580	163912	164907	-	lplA1	1-996/996	100	100	vfdb	NP_464456	(lplA1) lipoate protein ligase [LplA1 (VF0347) - Nutritional/Metabolic factor (VFC0272)] [Listeria monocytogenes EGD-e]
CFSAN119106	NODE_5_length_277163_cov_26.673580	262181	263566	-	hpt	1-1386/1386	100	97.83	vfdb	NP_464364	(hpt) hexose phosphate transport protein [Hpt (VF0264) - Nutritional/Metabolic factor (VFC0272)] [Listeria monocytogenes EGD-e]
CFSAN119106	NODE_6_length_233410_cov_30.681738	102324	102920	+	clpP	1-597/597	100	100	vfdb	NP_465991	(clpP) ATP-dependent Clp protease proteolytic subunit [ClpP (VF0074) - Stress survival (VFC0282)] [Listeria monocytogenes EGD-e]
CFSAN119106	NODE_6_length_233410_cov_30.681738	104575	105741	+	inlP	1-1167/1167	100	99.14	vfdb	NP_465993	(inlP) internalin P [InlP (VF0577) - Adherence (VFC0001)] [Listeria monocytogenes EGD-e]
CFSAN119106	NODE_6_length_233410_cov_30.681738	185289	185726	-	gtcA	1-438/438	100	100	vfdb	NP_466072	(gtcA) wall teichoic acid glycosylation protein GtcA [GtcA (VF0607) - Post-translational modification (VFC0315)] [Listeria monocytogenes EGD-e]
CFSAN119106	NODE_6_length_233410_cov_30.681738	195476	198229	+	ami	1-2754/2754	100	99.27	vfdb	NP_466081	(ami) autolysin amidase adhesin [Ami (VF0071) - Adherence (VFC0001)] [Listeria monocytogenes EGD-e]
CFSAN119106	NODE_7_length_217173_cov_26.720829	20691	25826	+	lapB	1-5136/5136	100	98.87	vfdb	NP_465191	(lapB) Listeria adhesion protein LapB [LapB (VF0446) - Adherence (VFC0001)] [Listeria monocytogenes EGD-e]
CFSAN119106	NODE_7_length_217173_cov_26.720829	63011	65611	-	lap	1-2601/2601	100	100	vfdb	NP_465159	(lap) Listeria adhesion protein Lap [Lap (VF0444) - Adherence (VFC0001)] [Listeria monocytogenes EGD-e]
CFSAN119106	NODE_8_length_180132_cov_28.070820	87790	88671	-	prsA2	1-882/882	100	100	vfdb	NP_465743	(prsA2) post translocation chaperone PrsA2 [PrsA2 (VF0449) - Post-translational modification (VFC0315)] [Listeria monocytogenes EGD-e]
CFSAN119106	NODE_8_length_180132_cov_28.070820	120754	121377	+	hbp1/svpA	1-624/624	100	100	vfdb	NP_465710	(hbp1/svpA) Haemoglobin binding protein 1 [SvpA (VF0263) - Nutritional/Metabolic factor (VFC0272)] [Listeria monocytogenes EGD-e]
CFSAN119106	NODE_8_length_180132_cov_28.070820	121392	123101	+	hbp2	1-1710/1710	100	100	vfdb	NP_465709	(hbp2) hypothetical protein [SvpA (VF0263) - Nutritional/Metabolic factor (VFC0272)] [Listeria monocytogenes EGD-e]
CFSAN119107	NODE_10_length_108841_cov_38.032967	87790	88671	-	prsA2	1-882/882	100	100	vfdb	NP_465743	(prsA2) post translocation chaperone PrsA2 [PrsA2 (VF0449) - Post-translational modification (VFC0315)] [Listeria monocytogenes EGD-e]
CFSAN119107	NODE_11_length_91077_cov_34.616899	39482	40099	-	lntA	1-618/618	100	99.68	vfdb	NP_463967	(lntA) listeria nuclear targeted protein A [LntA (VF0440) - Immune modulation (VFC0258)] [Listeria monocytogenes EGD-e]
CFSAN119107	NODE_11_length_91077_cov_34.616899	48704	50596	-	inlB	1-1893/1893	100	100	vfdb	NP_463963	(inlB) Internalin B [InlB (VF0070) - Invasion (VFC0083)] [Listeria monocytogenes EGD-e]
CFSAN119107	NODE_11_length_91077_cov_34.616899	50681	53083	-	inlA	1-2403/2403	100	100	vfdb	NP_463962	(inlA) Internalin A [InlA (VF0069) - Invasion (VFC0083)] [Listeria monocytogenes EGD-e]
CFSAN119107	NODE_11_length_91077_cov_34.616899	68735	70135	-	pdgA	1-1401/1401	100	100	vfdb	NP_463944	(pdgA) Peptidoglycan N-deacetylase [PgdA (VF0442) - Immune modulation (VFC0258)] [Listeria monocytogenes EGD-e]
CFSAN119107	NODE_11_length_91077_cov_34.616899	75523	77988	-	inlF	1-2466/2466	100	100	vfdb	NP_463939	(inlF) internalin F [InlF (VF0447) - Adherence (VFC0001)] [Listeria monocytogenes EGD-e]
CFSAN119107	NODE_13_length_64254_cov_42.201241	25112	25981	-	plcB	1-870/870	100	100	vfdb	NP_463736	(plcB) phospholipase C [PlcB (VF0067) - Exotoxin (VFC0235)] [Listeria monocytogenes EGD-e]
CFSAN119107	NODE_13_length_64254_cov_42.201241	26017	27936	-	actA	1-1920/1920	100	100	vfdb	NP_463735	(actA) actin-assembly inducing protein precursor [ActA (VF0066) - Motility (VFC0204)] [Listeria monocytogenes EGD-e]
CFSAN119107	NODE_13_length_64254_cov_42.201241	28135	29667	-	mpl	1-1533/1533	100	99.94	vfdb	NP_463734	(mpl) Zinc metalloproteinase precursor [Mpl (VF0065) - Exoenzyme (VFC0251)] [Listeria monocytogenes EGD-e]
CFSAN119107	NODE_13_length_64254_cov_42.201241	29998	31587	-	hly	1-1590/1590	100	100	vfdb	NP_463733	(hly) listeriolysin O precursor [LLO (VF0064) - Exotoxin (VFC0235)] [Listeria monocytogenes EGD-e]
CFSAN119107	NODE_13_length_64254_cov_42.201241	31829	32782	+	plcA	1-954/954	100	100	vfdb	NP_463732	(plcA) phosphatidylinositol-specific phospholipase c [PlcA (VF0063) - Exotoxin (VFC0235)] [Listeria monocytogenes EGD-e]
CFSAN119107	NODE_13_length_64254_cov_42.201241	33053	33766	+	prfA	1-714/714	100	100	vfdb	NP_463731	(prfA) listeriolysin positive regulatory protein [PrfA (VF0062) - Regulation (VFC0301)] [Listeria monocytogenes EGD-e]
CFSAN119107	NODE_1_length_433192_cov_37.555824	11881	12504	+	hbp1/svpA	1-624/624	100	100	vfdb	NP_465710	(hbp1/svpA) Haemoglobin binding protein 1 [SvpA (VF0263) - Nutritional/Metabolic factor (VFC0272)] [Listeria monocytogenes EGD-e]
CFSAN119107	NODE_1_length_433192_cov_37.555824	12519	14228	+	hbp2	1-1710/1710	100	100	vfdb	NP_465709	(hbp2) hypothetical protein [SvpA (VF0263) - Nutritional/Metabolic factor (VFC0272)] [Listeria monocytogenes EGD-e]
CFSAN119107	NODE_1_length_433192_cov_37.555824	139203	140180	+	bsh	1-978/978	100	100	vfdb	NP_465591	(bsh) bile salt hydrolase [BSH (VF0350) - Stress survival (VFC0282)] [Listeria monocytogenes EGD-e]
CFSAN119107	NODE_1_length_433192_cov_37.555824	361873	362805	+	lpeA	1-933/933	100	100	vfdb	NP_465372	(lpeA) lipoprotein promoting cell invasion [LpeA (VF0346) - Invasion (VFC0083)] [Listeria monocytogenes EGD-e]
CFSAN119107	NODE_1_length_433192_cov_37.555824	365730	366194	+	lspA	1-465/465	100	100	vfdb	NP_465369	(lspA) signal peptidase II [Lsp (VF0351) - Post-translational modification (VFC0315)] [Listeria monocytogenes EGD-e]
CFSAN119107	NODE_1_length_433192_cov_37.555824	380766	382478	-	fbpA	1-1713/1713	100	99.88	vfdb	NP_465354	(fbpA) fibronectin-binding protein [FbpA (VF0349) - Adherence (VFC0001)] [Listeria monocytogenes EGD-e]
CFSAN119107	NODE_1_length_433192_cov_37.555824	425510	426400	+	inlC	1-891/891	100	100	vfdb	NP_465311	(inlC) internalin C [InlC (VF0438) - Immune modulation (VFC0258)] [Listeria monocytogenes EGD-e]
CFSAN119107	NODE_2_length_410329_cov_41.928011	228530	231085	+	inlJ	1-2556/2556	100	100	vfdb	NP_466343	(inlJ) internalin J [InlJ (VF0445) - Adherence (VFC0001)] [Listeria monocytogenes EGD-e]
CFSAN119107	NODE_3_length_344690_cov_35.364897	232024	233466	+	iap/cwhA	1-1449/1449	99.59	99.59	vfdb	NP_464110	(iap/cwhA) P60 extracellular protein invasion associated protein Iap [P60 (VF0068) - Invasion (VFC0083)] [Listeria monocytogenes EGD-e]
CFSAN119107	NODE_4_length_333140_cov_34.635534	206643	208511	+	oatA	1-1869/1869	100	99.57	vfdb	NP_464816	(oatA) peptidoglycan O-acetyltransferase [OatA (VF0441) - Immune modulation (VFC0258)] [Listeria monocytogenes EGD-e]
CFSAN119107	NODE_4_length_333140_cov_34.635534	208545	210341	-	inlK	1-1797/1797	100	100	vfdb	NP_464815	(inlK) internalin K [InlK (VF0439) - Immune modulation (VFC0258)] [Listeria monocytogenes EGD-e]
CFSAN119107	NODE_5_length_277066_cov_33.193476	25834	27551	-	aut	1-1719/1719	99.94	99.83	vfdb	NP_464601	(aut) autolysin [Auto (VF0348) - Invasion (VFC0083)] [Listeria monocytogenes EGD-e]
CFSAN119107	NODE_5_length_277066_cov_33.193476	104547	106721	+	clpE	1-2175/2175	100	100	vfdb	NP_464522	(clpE) ATP-dependent protease [ClpE (VF0073) - Stress survival (VFC0282)] [Listeria monocytogenes EGD-e]
CFSAN119107	NODE_5_length_277066_cov_33.193476	163815	164810	-	lplA1	1-996/996	100	100	vfdb	NP_464456	(lplA1) lipoate protein ligase [LplA1 (VF0347) - Nutritional/Metabolic factor (VFC0272)] [Listeria monocytogenes EGD-e]
CFSAN119107	NODE_5_length_277066_cov_33.193476	262084	263469	-	hpt	1-1386/1386	100	97.83	vfdb	NP_464364	(hpt) hexose phosphate transport protein [Hpt (VF0264) - Nutritional/Metabolic factor (VFC0272)] [Listeria monocytogenes EGD-e]
CFSAN119107	NODE_6_length_233446_cov_40.998766	102360	102956	+	clpP	1-597/597	100	100	vfdb	NP_465991	(clpP) ATP-dependent Clp protease proteolytic subunit [ClpP (VF0074) - Stress survival (VFC0282)] [Listeria monocytogenes EGD-e]
CFSAN119107	NODE_6_length_233446_cov_40.998766	104611	105777	+	inlP	1-1167/1167	100	99.14	vfdb	NP_465993	(inlP) internalin P [InlP (VF0577) - Adherence (VFC0001)] [Listeria monocytogenes EGD-e]
CFSAN119107	NODE_6_length_233446_cov_40.998766	185325	185762	-	gtcA	1-438/438	100	100	vfdb	NP_466072	(gtcA) wall teichoic acid glycosylation protein GtcA [GtcA (VF0607) - Post-translational modification (VFC0315)] [Listeria monocytogenes EGD-e]
CFSAN119107	NODE_6_length_233446_cov_40.998766	195512	198265	+	ami	1-2754/2754	100	99.27	vfdb	NP_466081	(ami) autolysin amidase adhesin [Ami (VF0071) - Adherence (VFC0001)] [Listeria monocytogenes EGD-e]
CFSAN119107	NODE_7_length_217173_cov_34.336445	20691	25826	+	lapB	1-5136/5136	100	98.87	vfdb	NP_465191	(lapB) Listeria adhesion protein LapB [LapB (VF0446) - Adherence (VFC0001)] [Listeria monocytogenes EGD-e]
CFSAN119107	NODE_7_length_217173_cov_34.336445	63011	65611	-	lap	1-2601/2601	100	100	vfdb	NP_465159	(lap) Listeria adhesion protein Lap [Lap (VF0444) - Adherence (VFC0001)] [Listeria monocytogenes EGD-e]
CFSAN119107	NODE_9_length_119392_cov_38.737459	2304	4766	+	clpC	1-2463/2463	100	100	vfdb	NP_463763	(clpC) endopeptidase Clp ATP-binding chain C [ClpC (VF0072) - Stress survival (VFC0282)] [Listeria monocytogenes EGD-e]
CFSAN119110	NODE_12_length_75084_cov_22.352909	2304	4766	+	clpC	1-2463/2463	100	100	vfdb	NP_463763	(clpC) endopeptidase Clp ATP-binding chain C [ClpC (VF0072) - Stress survival (VFC0282)] [Listeria monocytogenes EGD-e]
CFSAN119110	NODE_15_length_64810_cov_18.087535	36311	38911	+	lap	1-2601/2601	100	100	vfdb	NP_465159	(lap) Listeria adhesion protein Lap [Lap (VF0444) - Adherence (VFC0001)] [Listeria monocytogenes EGD-e]
CFSAN119110	NODE_17_length_64444_cov_18.727724	57699	59141	+	iap/cwhA	1-1449/1449	99.59	99.59	vfdb	NP_464110	(iap/cwhA) P60 extracellular protein invasion associated protein Iap [P60 (VF0068) - Invasion (VFC0083)] [Listeria monocytogenes EGD-e]
CFSAN119110	NODE_18_length_64254_cov_21.539741	25112	25981	-	plcB	1-870/870	100	100	vfdb	NP_463736	(plcB) phospholipase C [PlcB (VF0067) - Exotoxin (VFC0235)] [Listeria monocytogenes EGD-e]
CFSAN119110	NODE_18_length_64254_cov_21.539741	26017	27936	-	actA	1-1920/1920	100	100	vfdb	NP_463735	(actA) actin-assembly inducing protein precursor [ActA (VF0066) - Motility (VFC0204)] [Listeria monocytogenes EGD-e]
CFSAN119110	NODE_18_length_64254_cov_21.539741	28135	29667	-	mpl	1-1533/1533	100	99.94	vfdb	NP_463734	(mpl) Zinc metalloproteinase precursor [Mpl (VF0065) - Exoenzyme (VFC0251)] [Listeria monocytogenes EGD-e]
CFSAN119110	NODE_18_length_64254_cov_21.539741	29998	31587	-	hly	1-1590/1590	100	100	vfdb	NP_463733	(hly) listeriolysin O precursor [LLO (VF0064) - Exotoxin (VFC0235)] [Listeria monocytogenes EGD-e]
CFSAN119110	NODE_18_length_64254_cov_21.539741	31829	32782	+	plcA	1-954/954	100	100	vfdb	NP_463732	(plcA) phosphatidylinositol-specific phospholipase c [PlcA (VF0063) - Exotoxin (VFC0235)] [Listeria monocytogenes EGD-e]
CFSAN119110	NODE_18_length_64254_cov_21.539741	33053	33766	+	prfA	1-714/714	100	100	vfdb	NP_463731	(prfA) listeriolysin positive regulatory protein [PrfA (VF0062) - Regulation (VFC0301)] [Listeria monocytogenes EGD-e]
CFSAN119110	NODE_1_length_342667_cov_20.496103	67810	68787	+	bsh	1-978/978	100	100	vfdb	NP_465591	(bsh) bile salt hydrolase [BSH (VF0350) - Stress survival (VFC0282)] [Listeria monocytogenes EGD-e]
CFSAN119110	NODE_1_length_342667_cov_20.496103	290480	291412	+	lpeA	1-933/933	100	100	vfdb	NP_465372	(lpeA) lipoprotein promoting cell invasion [LpeA (VF0346) - Invasion (VFC0083)] [Listeria monocytogenes EGD-e]
CFSAN119110	NODE_1_length_342667_cov_20.496103	294337	294801	+	lspA	1-465/465	100	100	vfdb	NP_465369	(lspA) signal peptidase II [Lsp (VF0351) - Post-translational modification (VFC0315)] [Listeria monocytogenes EGD-e]
CFSAN119110	NODE_1_length_342667_cov_20.496103	309373	311085	-	fbpA	1-1713/1713	100	99.88	vfdb	NP_465354	(fbpA) fibronectin-binding protein [FbpA (VF0349) - Adherence (VFC0001)] [Listeria monocytogenes EGD-e]
CFSAN119110	NODE_21_length_59584_cov_18.749769	57098	58807	-	hbp2	1-1710/1710	100	100	vfdb	NP_465709	(hbp2) hypothetical protein [SvpA (VF0263) - Nutritional/Metabolic factor (VFC0272)] [Listeria monocytogenes EGD-e]
CFSAN119110	NODE_21_length_59584_cov_18.749769	58822	59445	-	hbp1/svpA	1-624/624	100	100	vfdb	NP_465710	(hbp1/svpA) Haemoglobin binding protein 1 [SvpA (VF0263) - Nutritional/Metabolic factor (VFC0272)] [Listeria monocytogenes EGD-e]
CFSAN119110	NODE_25_length_43177_cov_19.806179	13101	15566	+	inlF	1-2466/2466	100	100	vfdb	NP_463939	(inlF) internalin F [InlF (VF0447) - Adherence (VFC0001)] [Listeria monocytogenes EGD-e]
CFSAN119110	NODE_25_length_43177_cov_19.806179	20954	22354	+	pdgA	1-1401/1401	100	100	vfdb	NP_463944	(pdgA) Peptidoglycan N-deacetylase [PgdA (VF0442) - Immune modulation (VFC0258)] [Listeria monocytogenes EGD-e]
CFSAN119110	NODE_25_length_43177_cov_19.806179	38006	40408	+	inlA	1-2403/2403	100	100	vfdb	NP_463962	(inlA) Internalin A [InlA (VF0069) - Invasion (VFC0083)] [Listeria monocytogenes EGD-e]
CFSAN119110	NODE_25_length_43177_cov_19.806179	40493	42385	+	inlB	1-1893/1893	100	100	vfdb	NP_463963	(inlB) Internalin B [InlB (VF0070) - Invasion (VFC0083)] [Listeria monocytogenes EGD-e]
CFSAN119110	NODE_28_length_37065_cov_19.244193	11240	16375	-	lapB	1-5136/5136	100	98.87	vfdb	NP_465191	(lapB) Listeria adhesion protein LapB [LapB (VF0446) - Adherence (VFC0001)] [Listeria monocytogenes EGD-e]
CFSAN119110	NODE_36_length_23192_cov_18.376545	7684	8301	+	lntA	1-618/618	100	99.68	vfdb	NP_463967	(lntA) listeria nuclear targeted protein A [LntA (VF0440) - Immune modulation (VFC0258)] [Listeria monocytogenes EGD-e]
CFSAN119110	NODE_3_length_133752_cov_21.111820	87374	89929	-	inlJ	1-2556/2556	100	100	vfdb	NP_466343	(inlJ) internalin J [InlJ (VF0445) - Adherence (VFC0001)] [Listeria monocytogenes EGD-e]
CFSAN119110	NODE_40_length_18639_cov_17.300400	6396	7286	-	inlC	1-891/891	100	100	vfdb	NP_465311	(inlC) internalin C [InlC (VF0438) - Immune modulation (VFC0258)] [Listeria monocytogenes EGD-e]
CFSAN119110	NODE_4_length_133379_cov_21.134009	2293	2889	+	clpP	1-597/597	100	100	vfdb	NP_465991	(clpP) ATP-dependent Clp protease proteolytic subunit [ClpP (VF0074) - Stress survival (VFC0282)] [Listeria monocytogenes EGD-e]
CFSAN119110	NODE_4_length_133379_cov_21.134009	4544	5710	+	inlP	1-1167/1167	100	99.14	vfdb	NP_465993	(inlP) internalin P [InlP (VF0577) - Adherence (VFC0001)] [Listeria monocytogenes EGD-e]
CFSAN119110	NODE_4_length_133379_cov_21.134009	85258	85695	-	gtcA	1-438/438	100	100	vfdb	NP_466072	(gtcA) wall teichoic acid glycosylation protein GtcA [GtcA (VF0607) - Post-translational modification (VFC0315)] [Listeria monocytogenes EGD-e]
CFSAN119110	NODE_4_length_133379_cov_21.134009	95445	98198	+	ami	1-2754/2754	100	99.27	vfdb	NP_466081	(ami) autolysin amidase adhesin [Ami (VF0071) - Adherence (VFC0001)] [Listeria monocytogenes EGD-e]
CFSAN119110	NODE_50_length_10854_cov_17.029738	4321	5706	+	hpt	1-1386/1386	100	97.83	vfdb	NP_464364	(hpt) hexose phosphate transport protein [Hpt (VF0264) - Nutritional/Metabolic factor (VFC0272)] [Listeria monocytogenes EGD-e]
CFSAN119110	NODE_5_length_125486_cov_17.441955	19216	21390	-	clpE	1-2175/2175	100	100	vfdb	NP_464522	(clpE) ATP-dependent protease [ClpE (VF0073) - Stress survival (VFC0282)] [Listeria monocytogenes EGD-e]
CFSAN119110	NODE_5_length_125486_cov_17.441955	98386	100103	+	aut	1-1719/1719	99.94	99.83	vfdb	NP_464601	(aut) autolysin [Auto (VF0348) - Invasion (VFC0083)] [Listeria monocytogenes EGD-e]
CFSAN119110	NODE_6_length_125179_cov_17.721700	121202	123070	+	oatA	1-1869/1869	100	99.57	vfdb	NP_464816	(oatA) peptidoglycan O-acetyltransferase [OatA (VF0441) - Immune modulation (VFC0258)] [Listeria monocytogenes EGD-e]
CFSAN119110	NODE_6_length_125179_cov_17.721700	123104	124900	-	inlK	1-1797/1797	100	100	vfdb	NP_464815	(inlK) internalin K [InlK (VF0439) - Immune modulation (VFC0258)] [Listeria monocytogenes EGD-e]
CFSAN119110	NODE_8_length_110257_cov_19.945410	86834	87715	-	prsA2	1-882/882	100	100	vfdb	NP_465743	(prsA2) post translocation chaperone PrsA2 [PrsA2 (VF0449) - Post-translational modification (VFC0315)] [Listeria monocytogenes EGD-e]
CFSAN119110	NODE_9_length_99042_cov_18.621311	37869	38864	-	lplA1	1-996/996	100	100	vfdb	NP_464456	(lplA1) lipoate protein ligase [LplA1 (VF0347) - Nutritional/Metabolic factor (VFC0272)] [Listeria monocytogenes EGD-e]
CFSAN119111	NODE_10_length_75214_cov_23.077697	73284	75001	+	aut	1-1719/1719	99.94	99.83	vfdb	NP_464601	(aut) autolysin [Auto (VF0348) - Invasion (VFC0083)] [Listeria monocytogenes EGD-e]
CFSAN119111	NODE_12_length_64254_cov_28.503937	25112	25981	-	plcB	1-870/870	100	100	vfdb	NP_463736	(plcB) phospholipase C [PlcB (VF0067) - Exotoxin (VFC0235)] [Listeria monocytogenes EGD-e]
CFSAN119111	NODE_12_length_64254_cov_28.503937	26017	27936	-	actA	1-1920/1920	100	100	vfdb	NP_463735	(actA) actin-assembly inducing protein precursor [ActA (VF0066) - Motility (VFC0204)] [Listeria monocytogenes EGD-e]
CFSAN119111	NODE_12_length_64254_cov_28.503937	28135	29667	-	mpl	1-1533/1533	100	99.94	vfdb	NP_463734	(mpl) Zinc metalloproteinase precursor [Mpl (VF0065) - Exoenzyme (VFC0251)] [Listeria monocytogenes EGD-e]
CFSAN119111	NODE_12_length_64254_cov_28.503937	29998	31587	-	hly	1-1590/1590	100	100	vfdb	NP_463733	(hly) listeriolysin O precursor [LLO (VF0064) - Exotoxin (VFC0235)] [Listeria monocytogenes EGD-e]
CFSAN119111	NODE_12_length_64254_cov_28.503937	31829	32782	+	plcA	1-954/954	100	100	vfdb	NP_463732	(plcA) phosphatidylinositol-specific phospholipase c [PlcA (VF0063) - Exotoxin (VFC0235)] [Listeria monocytogenes EGD-e]
CFSAN119111	NODE_12_length_64254_cov_28.503937	33053	33766	+	prfA	1-714/714	100	100	vfdb	NP_463731	(prfA) listeriolysin positive regulatory protein [PrfA (VF0062) - Regulation (VFC0301)] [Listeria monocytogenes EGD-e]
CFSAN119111	NODE_18_length_45810_cov_28.008712	135	1301	+	inlP	1-1167/1167	100	99.14	vfdb	NP_465993	(inlP) internalin P [InlP (VF0577) - Adherence (VFC0001)] [Listeria monocytogenes EGD-e]
CFSAN119111	NODE_1_length_166878_cov_27.408507	76878	79433	+	inlJ	1-2556/2556	100	100	vfdb	NP_466343	(inlJ) internalin J [InlJ (VF0445) - Adherence (VFC0001)] [Listeria monocytogenes EGD-e]
CFSAN119111	NODE_20_length_45638_cov_23.938718	40232	41674	+	iap/cwhA	1-1449/1449	99.59	99.59	vfdb	NP_464110	(iap/cwhA) P60 extracellular protein invasion associated protein Iap [P60 (VF0068) - Invasion (VFC0083)] [Listeria monocytogenes EGD-e]
CFSAN119111	NODE_25_length_35166_cov_28.353720	33055	33651	+	clpP	1-597/597	100	100	vfdb	NP_465991	(clpP) ATP-dependent Clp protease proteolytic subunit [ClpP (VF0074) - Stress survival (VFC0282)] [Listeria monocytogenes EGD-e]
CFSAN119111	NODE_2_length_144245_cov_27.740407	31680	33392	+	fbpA	1-1713/1713	100	99.88	vfdb	NP_465354	(fbpA) fibronectin-binding protein [FbpA (VF0349) - Adherence (VFC0001)] [Listeria monocytogenes EGD-e]
CFSAN119111	NODE_2_length_144245_cov_27.740407	47964	48428	-	lspA	1-465/465	100	100	vfdb	NP_465369	(lspA) signal peptidase II [Lsp (VF0351) - Post-translational modification (VFC0315)] [Listeria monocytogenes EGD-e]
CFSAN119111	NODE_2_length_144245_cov_27.740407	51353	52285	-	lpeA	1-933/933	100	100	vfdb	NP_465372	(lpeA) lipoprotein promoting cell invasion [LpeA (VF0346) - Invasion (VFC0083)] [Listeria monocytogenes EGD-e]
CFSAN119111	NODE_30_length_33935_cov_26.437766	8481	13616	-	lapB	1-5136/5136	100	98.87	vfdb	NP_465191	(lapB) Listeria adhesion protein LapB [LapB (VF0446) - Adherence (VFC0001)] [Listeria monocytogenes EGD-e]
CFSAN119111	NODE_32_length_32181_cov_22.623604	29098	31272	-	clpE	1-2175/2175	100	100	vfdb	NP_464522	(clpE) ATP-dependent protease [ClpE (VF0073) - Stress survival (VFC0282)] [Listeria monocytogenes EGD-e]
CFSAN119111	NODE_34_length_31605_cov_24.953205	20573	21454	+	prsA2	1-882/882	100	100	vfdb	NP_465743	(prsA2) post translocation chaperone PrsA2 [PrsA2 (VF0449) - Post-translational modification (VFC0315)] [Listeria monocytogenes EGD-e]
CFSAN119111	NODE_40_length_27107_cov_24.488955	252	2852	+	lap	1-2601/2601	100	100	vfdb	NP_465159	(lap) Listeria adhesion protein Lap [Lap (VF0444) - Adherence (VFC0001)] [Listeria monocytogenes EGD-e]
CFSAN119111	NODE_41_length_26798_cov_23.210491	116	739	+	hbp1/svpA	1-624/624	100	100	vfdb	NP_465710	(hbp1/svpA) Haemoglobin binding protein 1 [SvpA (VF0263) - Nutritional/Metabolic factor (VFC0272)] [Listeria monocytogenes EGD-e]
CFSAN119111	NODE_41_length_26798_cov_23.210491	754	2463	+	hbp2	1-1710/1710	100	100	vfdb	NP_465709	(hbp2) hypothetical protein [SvpA (VF0263) - Nutritional/Metabolic factor (VFC0272)] [Listeria monocytogenes EGD-e]
CFSAN119111	NODE_52_length_18632_cov_21.882086	11347	12237	+	inlC	1-891/891	100	100	vfdb	NP_465311	(inlC) internalin C [InlC (VF0438) - Immune modulation (VFC0258)] [Listeria monocytogenes EGD-e]
CFSAN119111	NODE_53_length_18331_cov_27.384476	2777	5242	-	inlF	1-2466/2466	100	100	vfdb	NP_463939	(inlF) internalin F [InlF (VF0447) - Adherence (VFC0001)] [Listeria monocytogenes EGD-e]
CFSAN119111	NODE_5_length_87671_cov_23.567280	58709	59704	+	lplA1	1-996/996	100	100	vfdb	NP_464456	(lplA1) lipoate protein ligase [LplA1 (VF0347) - Nutritional/Metabolic factor (VFC0272)] [Listeria monocytogenes EGD-e]
CFSAN119111	NODE_60_length_17272_cov_26.073316	754	2646	-	inlB	1-1893/1893	100	100	vfdb	NP_463963	(inlB) Internalin B [InlB (VF0070) - Invasion (VFC0083)] [Listeria monocytogenes EGD-e]
CFSAN119111	NODE_60_length_17272_cov_26.073316	2731	5133	-	inlA	1-2403/2403	100	100	vfdb	NP_463962	(inlA) Internalin A [InlA (VF0069) - Invasion (VFC0083)] [Listeria monocytogenes EGD-e]
CFSAN119111	NODE_63_length_14986_cov_21.520089	11558	13426	+	oatA	1-1869/1869	100	99.57	vfdb	NP_464816	(oatA) peptidoglycan O-acetyltransferase [OatA (VF0441) - Immune modulation (VFC0258)] [Listeria monocytogenes EGD-e]
CFSAN119111	NODE_63_length_14986_cov_21.520089	13460	14986	-	inlK	271-1797/1797	84.97	100	vfdb	NP_464815	(inlK) internalin K [InlK (VF0439) - Immune modulation (VFC0258)] [Listeria monocytogenes EGD-e]
CFSAN119111	NODE_66_length_14152_cov_23.032299	5852	6469	-	lntA	1-618/618	100	99.68	vfdb	NP_463967	(lntA) listeria nuclear targeted protein A [LntA (VF0440) - Immune modulation (VFC0258)] [Listeria monocytogenes EGD-e]
CFSAN119111	NODE_70_length_12252_cov_22.042887	5146	6531	-	hpt	1-1386/1386	100	97.83	vfdb	NP_464364	(hpt) hexose phosphate transport protein [Hpt (VF0264) - Nutritional/Metabolic factor (VFC0272)] [Listeria monocytogenes EGD-e]
CFSAN119111	NODE_7_length_82858_cov_27.665240	34906	37659	-	ami	1-2754/2754	100	99.27	vfdb	NP_466081	(ami) autolysin amidase adhesin [Ami (VF0071) - Adherence (VFC0001)] [Listeria monocytogenes EGD-e]
CFSAN119111	NODE_7_length_82858_cov_27.665240	47409	47846	+	gtcA	1-438/438	100	100	vfdb	NP_466072	(gtcA) wall teichoic acid glycosylation protein GtcA [GtcA (VF0607) - Post-translational modification (VFC0315)] [Listeria monocytogenes EGD-e]
CFSAN119111	NODE_85_length_7809_cov_22.985681	2659	4059	+	pdgA	1-1401/1401	100	100	vfdb	NP_463944	(pdgA) Peptidoglycan N-deacetylase [PgdA (VF0442) - Immune modulation (VFC0258)] [Listeria monocytogenes EGD-e]
CFSAN119111	NODE_8_length_77199_cov_24.325086	7618	8595	-	bsh	1-978/978	100	100	vfdb	NP_465591	(bsh) bile salt hydrolase [BSH (VF0350) - Stress survival (VFC0282)] [Listeria monocytogenes EGD-e]
CFSAN119111	NODE_92_length_6500_cov_30.039699	2435	4897	+	clpC	1-2463/2463	100	100	vfdb	NP_463763	(clpC) endopeptidase Clp ATP-binding chain C [ClpC (VF0072) - Stress survival (VFC0282)] [Listeria monocytogenes EGD-e]
CFSAN119113	NODE_15_length_61935_cov_22.095829	19025	20911	+	oatA	1-1869/1869	100	93.48	vfdb	NP_464816	(oatA) peptidoglycan O-acetyltransferase [OatA (VF0441) - Immune modulation (VFC0258)] [Listeria monocytogenes EGD-e]
CFSAN119113	NODE_15_length_61935_cov_22.095829	20944	22764	-	inlK	1-1797/1797	100	89.18	vfdb	NP_464815	(inlK) internalin K [InlK (VF0439) - Immune modulation (VFC0258)] [Listeria monocytogenes EGD-e]
CFSAN119113	NODE_16_length_59662_cov_27.754968	21748	22725	+	bsh	1-978/978	100	97.75	vfdb	NP_465591	(bsh) bile salt hydrolase [BSH (VF0350) - Stress survival (VFC0282)] [Listeria monocytogenes EGD-e]
CFSAN119113	NODE_1_length_156224_cov_26.293689	35792	37177	+	hpt	1-1386/1386	100	97.76	vfdb	NP_464364	(hpt) hexose phosphate transport protein [Hpt (VF0264) - Nutritional/Metabolic factor (VFC0272)] [Listeria monocytogenes EGD-e]
CFSAN119113	NODE_1_length_156224_cov_26.293689	135154	136149	+	lplA1	1-996/996	100	92.57	vfdb	NP_464456	(lplA1) lipoate protein ligase [LplA1 (VF0347) - Nutritional/Metabolic factor (VFC0272)] [Listeria monocytogenes EGD-e]
CFSAN119113	NODE_23_length_44818_cov_28.386252	21937	23337	-	pdgA	1-1401/1401	100	97	vfdb	NP_463944	(pdgA) Peptidoglycan N-deacetylase [PgdA (VF0442) - Immune modulation (VFC0258)] [Listeria monocytogenes EGD-e]
CFSAN119113	NODE_23_length_44818_cov_28.386252	28723	31194	-	inlF	1-2466/2466	99.96	80.95	vfdb	NP_463939	(inlF) internalin F [InlF (VF0447) - Adherence (VFC0001)] [Listeria monocytogenes EGD-e]
CFSAN119113	NODE_27_length_41696_cov_24.390483	38698	40407	-	hbp2	1-1710/1710	100	93.45	vfdb	NP_465709	(hbp2) hypothetical protein [SvpA (VF0263) - Nutritional/Metabolic factor (VFC0272)] [Listeria monocytogenes EGD-e]
CFSAN119113	NODE_27_length_41696_cov_24.390483	40420	41046	-	hbp1/svpA	1-624/624	100	90.27	vfdb	NP_465710	(hbp1/svpA) Haemoglobin binding protein 1 [SvpA (VF0263) - Nutritional/Metabolic factor (VFC0272)] [Listeria monocytogenes EGD-e]
CFSAN119113	NODE_28_length_41018_cov_24.791152	884	3052	+	clpE	1-2175/2175	99.72	93.66	vfdb	NP_464522	(clpE) ATP-dependent protease [ClpE (VF0073) - Stress survival (VFC0282)] [Listeria monocytogenes EGD-e]
CFSAN119113	NODE_29_length_40287_cov_29.488521	20685	25841	+	lapB	1-5136/5136	100	93.08	vfdb	NP_465191	(lapB) Listeria adhesion protein LapB [LapB (VF0446) - Adherence (VFC0001)] [Listeria monocytogenes EGD-e]
CFSAN119113	NODE_30_length_39880_cov_34.010289	2432	4894	+	clpC	1-2463/2463	100	94.15	vfdb	NP_463763	(clpC) endopeptidase Clp ATP-binding chain C [ClpC (VF0072) - Stress survival (VFC0282)] [Listeria monocytogenes EGD-e]
CFSAN119113	NODE_34_length_34493_cov_25.589012	25452	26069	-	lntA	1-618/618	100	95.95	vfdb	NP_463967	(lntA) listeria nuclear targeted protein A [LntA (VF0440) - Immune modulation (VFC0258)] [Listeria monocytogenes EGD-e]
CFSAN119113	NODE_34_length_34493_cov_25.589012	27771	29661	-	inlB	1-1891/1893	99.89	92.33	vfdb	NP_463963	(inlB) Internalin B [InlB (VF0070) - Invasion (VFC0083)] [Listeria monocytogenes EGD-e]
CFSAN119113	NODE_34_length_34493_cov_25.589012	29746	32148	-	inlA	1-2403/2403	100	96.75	vfdb	NP_463962	(inlA) Internalin A [InlA (VF0069) - Invasion (VFC0083)] [Listeria monocytogenes EGD-e]
CFSAN119113	NODE_36_length_32848_cov_30.120015	25104	25972	-	plcB	2-870/870	99.89	95.63	vfdb	NP_463736	(plcB) phospholipase C [PlcB (VF0067) - Exotoxin (VFC0235)] [Listeria monocytogenes EGD-e]
CFSAN119113	NODE_36_length_32848_cov_30.120015	26011	27928	-	actA	1-1918/1920	99.9	94.21	vfdb	NP_463735	(actA) actin-assembly inducing protein precursor [ActA (VF0066) - Motility (VFC0204)] [Listeria monocytogenes EGD-e]
CFSAN119113	NODE_36_length_32848_cov_30.120015	28128	29660	-	mpl	1-1533/1533	100	94.91	vfdb	NP_463734	(mpl) Zinc metalloproteinase precursor [Mpl (VF0065) - Exoenzyme (VFC0251)] [Listeria monocytogenes EGD-e]
CFSAN119113	NODE_36_length_32848_cov_30.120015	29995	31584	-	hly	1-1590/1590	100	97.36	vfdb	NP_463733	(hly) listeriolysin O precursor [LLO (VF0064) - Exotoxin (VFC0235)] [Listeria monocytogenes EGD-e]
CFSAN119113	NODE_36_length_32848_cov_30.120015	31827	32780	+	plcA	1-954/954	100	97.38	vfdb	NP_463732	(plcA) phosphatidylinositol-specific phospholipase c [PlcA (VF0063) - Exotoxin (VFC0235)] [Listeria monocytogenes EGD-e]
CFSAN119113	NODE_49_length_22201_cov_24.376778	248	1129	+	prsA2	1-882/882	100	96.37	vfdb	NP_465743	(prsA2) post translocation chaperone PrsA2 [PrsA2 (VF0449) - Post-translational modification (VFC0315)] [Listeria monocytogenes EGD-e]
CFSAN119113	NODE_55_length_18965_cov_22.397760	5050	6306	-	vip	1-1200/1200	100	85.36	vfdb	NP_463850	(vip) surface adhesin Vip [Vip (VF0443) - Invasion (VFC0083)] [Listeria monocytogenes EGD-e]
CFSAN119113	NODE_56_length_18450_cov_23.321563	11133	12023	+	inlC	1-891/891	100	97.19	vfdb	NP_465311	(inlC) internalin C [InlC (VF0438) - Immune modulation (VFC0258)] [Listeria monocytogenes EGD-e]
CFSAN119113	NODE_5_length_81222_cov_29.438523	1	400	+	gtcA	39-438/438	90.87	80.35	vfdb	NP_466072	(gtcA) wall teichoic acid glycosylation protein GtcA [GtcA (VF0607) - Post-translational modification (VFC0315)] [Listeria monocytogenes EGD-e]
CFSAN119113	NODE_5_length_81222_cov_29.438523	79950	81116	-	inlP	1-1167/1167	100	95.2	vfdb	NP_465993	(inlP) internalin P [InlP (VF0577) - Adherence (VFC0001)] [Listeria monocytogenes EGD-e]
CFSAN119113	NODE_6_length_76907_cov_25.721490	23772	26372	-	lap	1-2601/2601	100	96.85	vfdb	NP_465159	(lap) Listeria adhesion protein Lap [Lap (VF0444) - Adherence (VFC0001)] [Listeria monocytogenes EGD-e]
CFSAN119113	NODE_74_length_10828_cov_22.914307	5298	6725	-	iap/cwhA	1-1449/1449	98.34	95.45	vfdb	NP_464110	(iap/cwhA) P60 extracellular protein invasion associated protein Iap [P60 (VF0068) - Invasion (VFC0083)] [Listeria monocytogenes EGD-e]
CFSAN119113	NODE_77_length_9300_cov_14.799302	1527	2123	-	clpP	1-597/597	100	96.82	vfdb	NP_465991	(clpP) ATP-dependent Clp protease proteolytic subunit [ClpP (VF0074) - Stress survival (VFC0282)] [Listeria monocytogenes EGD-e]
CFSAN119113	NODE_7_length_73798_cov_30.638990	31615	33327	+	fbpA	1-1713/1713	100	91.71	vfdb	NP_465354	(fbpA) fibronectin-binding protein [FbpA (VF0349) - Adherence (VFC0001)] [Listeria monocytogenes EGD-e]
CFSAN119113	NODE_7_length_73798_cov_30.638990	47898	48362	-	lspA	1-465/465	100	97.42	vfdb	NP_465369	(lspA) signal peptidase II [Lsp (VF0351) - Post-translational modification (VFC0315)] [Listeria monocytogenes EGD-e]
CFSAN119113	NODE_7_length_73798_cov_30.638990	51287	52219	-	lpeA	1-933/933	100	96.68	vfdb	NP_465372	(lpeA) lipoprotein promoting cell invasion [LpeA (VF0346) - Invasion (VFC0083)] [Listeria monocytogenes EGD-e]
CFSAN119113	NODE_87_length_4718_cov_30.958179	108	821	+	prfA	1-714/714	100	97.48	vfdb	NP_463731	(prfA) listeriolysin positive regulatory protein [PrfA (VF0062) - Regulation (VFC0301)] [Listeria monocytogenes EGD-e]
CFSAN119117	NODE_11_length_87679_cov_19.544088	2304	4766	+	clpC	1-2463/2463	100	100	vfdb	NP_463763	(clpC) endopeptidase Clp ATP-binding chain C [ClpC (VF0072) - Stress survival (VFC0282)] [Listeria monocytogenes EGD-e]
CFSAN119117	NODE_13_length_86025_cov_17.479220	18570	19547	+	bsh	1-978/978	100	100	vfdb	NP_465591	(bsh) bile salt hydrolase [BSH (VF0350) - Stress survival (VFC0282)] [Listeria monocytogenes EGD-e]
CFSAN119117	NODE_14_length_72120_cov_14.637117	43577	46177	+	lap	1-2601/2601	100	100	vfdb	NP_465159	(lap) Listeria adhesion protein Lap [Lap (VF0444) - Adherence (VFC0001)] [Listeria monocytogenes EGD-e]
CFSAN119117	NODE_16_length_64648_cov_19.158956	30489	31202	-	prfA	1-714/714	100	100	vfdb	NP_463731	(prfA) listeriolysin positive regulatory protein [PrfA (VF0062) - Regulation (VFC0301)] [Listeria monocytogenes EGD-e]
CFSAN119117	NODE_16_length_64648_cov_19.158956	31473	32426	-	plcA	1-954/954	100	100	vfdb	NP_463732	(plcA) phosphatidylinositol-specific phospholipase c [PlcA (VF0063) - Exotoxin (VFC0235)] [Listeria monocytogenes EGD-e]
CFSAN119117	NODE_16_length_64648_cov_19.158956	32668	34257	+	hly	1-1590/1590	100	100	vfdb	NP_463733	(hly) listeriolysin O precursor [LLO (VF0064) - Exotoxin (VFC0235)] [Listeria monocytogenes EGD-e]
CFSAN119117	NODE_16_length_64648_cov_19.158956	34588	36120	+	mpl	1-1533/1533	100	99.94	vfdb	NP_463734	(mpl) Zinc metalloproteinase precursor [Mpl (VF0065) - Exoenzyme (VFC0251)] [Listeria monocytogenes EGD-e]
CFSAN119117	NODE_16_length_64648_cov_19.158956	36319	38238	+	actA	1-1920/1920	100	100	vfdb	NP_463735	(actA) actin-assembly inducing protein precursor [ActA (VF0066) - Motility (VFC0204)] [Listeria monocytogenes EGD-e]
CFSAN119117	NODE_16_length_64648_cov_19.158956	38274	39143	+	plcB	1-870/870	100	100	vfdb	NP_463736	(plcB) phospholipase C [PlcB (VF0067) - Exotoxin (VFC0235)] [Listeria monocytogenes EGD-e]
CFSAN119117	NODE_19_length_49911_cov_16.637474	13090	15555	+	inlF	1-2466/2466	100	100	vfdb	NP_463939	(inlF) internalin F [InlF (VF0447) - Adherence (VFC0001)] [Listeria monocytogenes EGD-e]
CFSAN119117	NODE_19_length_49911_cov_16.637474	20943	22343	+	pdgA	1-1401/1401	100	100	vfdb	NP_463944	(pdgA) Peptidoglycan N-deacetylase [PgdA (VF0442) - Immune modulation (VFC0258)] [Listeria monocytogenes EGD-e]
CFSAN119117	NODE_19_length_49911_cov_16.637474	37995	40397	+	inlA	1-2403/2403	100	100	vfdb	NP_463962	(inlA) Internalin A [InlA (VF0069) - Invasion (VFC0083)] [Listeria monocytogenes EGD-e]
CFSAN119117	NODE_19_length_49911_cov_16.637474	40482	42374	+	inlB	1-1893/1893	100	100	vfdb	NP_463963	(inlB) Internalin B [InlB (VF0070) - Invasion (VFC0083)] [Listeria monocytogenes EGD-e]
CFSAN119117	NODE_1_length_418154_cov_15.685657	206654	208522	+	oatA	1-1869/1869	100	99.57	vfdb	NP_464816	(oatA) peptidoglycan O-acetyltransferase [OatA (VF0441) - Immune modulation (VFC0258)] [Listeria monocytogenes EGD-e]
CFSAN119117	NODE_1_length_418154_cov_15.685657	208556	210352	-	inlK	1-1797/1797	100	100	vfdb	NP_464815	(inlK) internalin K [InlK (VF0439) - Immune modulation (VFC0258)] [Listeria monocytogenes EGD-e]
CFSAN119117	NODE_23_length_34296_cov_18.505809	20691	25826	+	lapB	1-5136/5136	100	98.87	vfdb	NP_465191	(lapB) Listeria adhesion protein LapB [LapB (VF0446) - Adherence (VFC0001)] [Listeria monocytogenes EGD-e]
CFSAN119117	NODE_25_length_29311_cov_17.681572	27614	28231	-	lntA	1-618/618	100	99.68	vfdb	NP_463967	(lntA) listeria nuclear targeted protein A [LntA (VF0440) - Immune modulation (VFC0258)] [Listeria monocytogenes EGD-e]
CFSAN119117	NODE_29_length_18350_cov_14.989244	11062	11952	+	inlC	1-891/891	100	100	vfdb	NP_465311	(inlC) internalin C [InlC (VF0438) - Immune modulation (VFC0258)] [Listeria monocytogenes EGD-e]
CFSAN119117	NODE_2_length_258002_cov_15.789941	6770	8487	-	aut	1-1719/1719	99.94	99.83	vfdb	NP_464601	(aut) autolysin [Auto (VF0348) - Invasion (VFC0083)] [Listeria monocytogenes EGD-e]
CFSAN119117	NODE_2_length_258002_cov_15.789941	85483	87657	+	clpE	1-2175/2175	100	100	vfdb	NP_464522	(clpE) ATP-dependent protease [ClpE (VF0073) - Stress survival (VFC0282)] [Listeria monocytogenes EGD-e]
CFSAN119117	NODE_2_length_258002_cov_15.789941	144751	145746	-	lplA1	1-996/996	100	100	vfdb	NP_464456	(lplA1) lipoate protein ligase [LplA1 (VF0347) - Nutritional/Metabolic factor (VFC0272)] [Listeria monocytogenes EGD-e]
CFSAN119117	NODE_2_length_258002_cov_15.789941	243020	244405	-	hpt	1-1386/1386	100	97.83	vfdb	NP_464364	(hpt) hexose phosphate transport protein [Hpt (VF0264) - Nutritional/Metabolic factor (VFC0272)] [Listeria monocytogenes EGD-e]
CFSAN119117	NODE_3_length_199214_cov_18.545525	119994	122549	-	inlJ	1-2556/2556	100	100	vfdb	NP_466343	(inlJ) internalin J [InlJ (VF0445) - Adherence (VFC0001)] [Listeria monocytogenes EGD-e]
CFSAN119117	NODE_4_length_195787_cov_16.228284	90639	92081	+	iap/cwhA	1-1449/1449	99.59	99.59	vfdb	NP_464110	(iap/cwhA) P60 extracellular protein invasion associated protein Iap [P60 (VF0068) - Invasion (VFC0083)] [Listeria monocytogenes EGD-e]
CFSAN119117	NODE_5_length_193140_cov_17.777746	140932	141864	+	lpeA	1-933/933	100	100	vfdb	NP_465372	(lpeA) lipoprotein promoting cell invasion [LpeA (VF0346) - Invasion (VFC0083)] [Listeria monocytogenes EGD-e]
CFSAN119117	NODE_5_length_193140_cov_17.777746	144789	145253	+	lspA	1-465/465	100	100	vfdb	NP_465369	(lspA) signal peptidase II [Lsp (VF0351) - Post-translational modification (VFC0315)] [Listeria monocytogenes EGD-e]
CFSAN119117	NODE_5_length_193140_cov_17.777746	159825	161537	-	fbpA	1-1713/1713	100	99.88	vfdb	NP_465354	(fbpA) fibronectin-binding protein [FbpA (VF0349) - Adherence (VFC0001)] [Listeria monocytogenes EGD-e]
CFSAN119117	NODE_6_length_192011_cov_19.203420	35182	37935	-	ami	1-2754/2754	100	99.27	vfdb	NP_466081	(ami) autolysin amidase adhesin [Ami (VF0071) - Adherence (VFC0001)] [Listeria monocytogenes EGD-e]
CFSAN119117	NODE_6_length_192011_cov_19.203420	47685	48122	+	gtcA	1-438/438	100	100	vfdb	NP_466072	(gtcA) wall teichoic acid glycosylation protein GtcA [GtcA (VF0607) - Post-translational modification (VFC0315)] [Listeria monocytogenes EGD-e]
CFSAN119117	NODE_6_length_192011_cov_19.203420	127670	128836	-	inlP	1-1167/1167	100	99.14	vfdb	NP_465993	(inlP) internalin P [InlP (VF0577) - Adherence (VFC0001)] [Listeria monocytogenes EGD-e]
CFSAN119117	NODE_6_length_192011_cov_19.203420	130491	131087	-	clpP	1-597/597	100	100	vfdb	NP_465991	(clpP) ATP-dependent Clp protease proteolytic subunit [ClpP (VF0074) - Stress survival (VFC0282)] [Listeria monocytogenes EGD-e]
CFSAN119117	NODE_7_length_179049_cov_16.581790	57030	58739	-	hbp2	1-1710/1710	100	100	vfdb	NP_465709	(hbp2) hypothetical protein [SvpA (VF0263) - Nutritional/Metabolic factor (VFC0272)] [Listeria monocytogenes EGD-e]
CFSAN119117	NODE_7_length_179049_cov_16.581790	58754	59377	-	hbp1/svpA	1-624/624	100	100	vfdb	NP_465710	(hbp1/svpA) Haemoglobin binding protein 1 [SvpA (VF0263) - Nutritional/Metabolic factor (VFC0272)] [Listeria monocytogenes EGD-e]
CFSAN119117	NODE_7_length_179049_cov_16.581790	91460	92341	+	prsA2	1-882/882	100	100	vfdb	NP_465743	(prsA2) post translocation chaperone PrsA2 [PrsA2 (VF0449) - Post-translational modification (VFC0315)] [Listeria monocytogenes EGD-e]
CFSAN119118	NODE_10_length_99624_cov_11.426757	77112	78539	+	iap/cwhA	1-1449/1449	98.34	95.25	vfdb	NP_464110	(iap/cwhA) P60 extracellular protein invasion associated protein Iap [P60 (VF0068) - Invasion (VFC0083)] [Listeria monocytogenes EGD-e]
CFSAN119118	NODE_11_length_90215_cov_12.182444	13174	14574	-	pdgA	1-1401/1401	100	97	vfdb	NP_463944	(pdgA) Peptidoglycan N-deacetylase [PgdA (VF0442) - Immune modulation (VFC0258)] [Listeria monocytogenes EGD-e]
CFSAN119118	NODE_11_length_90215_cov_12.182444	19960	22431	-	inlF	1-2466/2466	99.96	80.79	vfdb	NP_463939	(inlF) internalin F [InlF (VF0447) - Adherence (VFC0001)] [Listeria monocytogenes EGD-e]
CFSAN119118	NODE_1_length_255745_cov_12.478413	6695	7585	-	inlC	1-891/891	100	97.19	vfdb	NP_465311	(inlC) internalin C [InlC (VF0438) - Immune modulation (VFC0258)] [Listeria monocytogenes EGD-e]
CFSAN119118	NODE_1_length_255745_cov_12.478413	50351	52063	+	fbpA	1-1713/1713	100	91.65	vfdb	NP_465354	(fbpA) fibronectin-binding protein [FbpA (VF0349) - Adherence (VFC0001)] [Listeria monocytogenes EGD-e]
CFSAN119118	NODE_1_length_255745_cov_12.478413	66633	67097	-	lspA	1-465/465	100	97.42	vfdb	NP_465369	(lspA) signal peptidase II [Lsp (VF0351) - Post-translational modification (VFC0315)] [Listeria monocytogenes EGD-e]
CFSAN119118	NODE_1_length_255745_cov_12.478413	70022	70954	-	lpeA	1-933/933	100	96.78	vfdb	NP_465372	(lpeA) lipoprotein promoting cell invasion [LpeA (VF0346) - Invasion (VFC0083)] [Listeria monocytogenes EGD-e]
CFSAN119118	NODE_24_length_41225_cov_14.149010	36493	38955	-	clpC	1-2463/2463	100	94.07	vfdb	NP_463763	(clpC) endopeptidase Clp ATP-binding chain C [ClpC (VF0072) - Stress survival (VFC0282)] [Listeria monocytogenes EGD-e]
CFSAN119118	NODE_28_length_37484_cov_12.598844	25070	25938	-	plcB	2-870/870	99.89	95.51	vfdb	NP_463736	(plcB) phospholipase C [PlcB (VF0067) - Exotoxin (VFC0235)] [Listeria monocytogenes EGD-e]
CFSAN119118	NODE_28_length_37484_cov_12.598844	27989	29521	-	mpl	1-1533/1533	100	94.85	vfdb	NP_463734	(mpl) Zinc metalloproteinase precursor [Mpl (VF0065) - Exoenzyme (VFC0251)] [Listeria monocytogenes EGD-e]
CFSAN119118	NODE_28_length_37484_cov_12.598844	29852	31441	-	hly	1-1590/1590	100	97.3	vfdb	NP_463733	(hly) listeriolysin O precursor [LLO (VF0064) - Exotoxin (VFC0235)] [Listeria monocytogenes EGD-e]
CFSAN119118	NODE_28_length_37484_cov_12.598844	31684	32637	+	plcA	1-954/954	100	97.38	vfdb	NP_463732	(plcA) phosphatidylinositol-specific phospholipase c [PlcA (VF0063) - Exotoxin (VFC0235)] [Listeria monocytogenes EGD-e]
CFSAN119118	NODE_28_length_37484_cov_12.598844	32909	33622	+	prfA	1-714/714	100	97.62	vfdb	NP_463731	(prfA) listeriolysin positive regulatory protein [PrfA (VF0062) - Regulation (VFC0301)] [Listeria monocytogenes EGD-e]
CFSAN119118	NODE_29_length_35165_cov_12.636851	20689	25827	+	lapB	1-5136/5136	100	93.29	vfdb	NP_465191	(lapB) Listeria adhesion protein LapB [LapB (VF0446) - Adherence (VFC0001)] [Listeria monocytogenes EGD-e]
CFSAN119118	NODE_33_length_28109_cov_12.775427	26422	27039	-	lntA	1-618/618	100	96.12	vfdb	NP_463967	(lntA) listeria nuclear targeted protein A [LntA (VF0440) - Immune modulation (VFC0258)] [Listeria monocytogenes EGD-e]
CFSAN119118	NODE_34_length_26721_cov_12.215537	438	3038	+	lap	1-2601/2601	100	97.19	vfdb	NP_465159	(lap) Listeria adhesion protein Lap [Lap (VF0444) - Adherence (VFC0001)] [Listeria monocytogenes EGD-e]
CFSAN119118	NODE_35_length_26463_cov_10.446651	5702	7087	+	hpt	1-1386/1386	100	97.62	vfdb	NP_464364	(hpt) hexose phosphate transport protein [Hpt (VF0264) - Nutritional/Metabolic factor (VFC0272)] [Listeria monocytogenes EGD-e]
CFSAN119118	NODE_37_length_24472_cov_12.294681	16558	17814	+	vip	1-1200/1200	100	85.28	vfdb	NP_463850	(vip) surface adhesin Vip [Vip (VF0443) - Invasion (VFC0083)] [Listeria monocytogenes EGD-e]
CFSAN119118	NODE_39_length_22914_cov_10.113398	154	1980	+	inlK	1-1797/1797	100	89	vfdb	NP_464815	(inlK) internalin K [InlK (VF0439) - Immune modulation (VFC0258)] [Listeria monocytogenes EGD-e]
CFSAN119118	NODE_39_length_22914_cov_10.113398	2013	3899	-	oatA	1-1869/1869	100	93.53	vfdb	NP_464816	(oatA) peptidoglycan O-acetyltransferase [OatA (VF0441) - Immune modulation (VFC0258)] [Listeria monocytogenes EGD-e]
CFSAN119118	NODE_41_length_21805_cov_12.051988	6588	7469	+	prsA2	1-882/882	100	96.48	vfdb	NP_465743	(prsA2) post translocation chaperone PrsA2 [PrsA2 (VF0449) - Post-translational modification (VFC0315)] [Listeria monocytogenes EGD-e]
CFSAN119118	NODE_49_length_15401_cov_11.051722	7699	9408	-	hbp2	1-1710/1710	100	93.51	vfdb	NP_465709	(hbp2) hypothetical protein [SvpA (VF0263) - Nutritional/Metabolic factor (VFC0272)] [Listeria monocytogenes EGD-e]
CFSAN119118	NODE_49_length_15401_cov_11.051722	9421	10047	-	hbp1/svpA	1-624/624	100	90.27	vfdb	NP_465710	(hbp1/svpA) Haemoglobin binding protein 1 [SvpA (VF0263) - Nutritional/Metabolic factor (VFC0272)] [Listeria monocytogenes EGD-e]
CFSAN119118	NODE_56_length_10912_cov_8.884376	5903	8305	+	inlA	1-2403/2403	100	96.75	vfdb	NP_463962	(inlA) Internalin A [InlA (VF0069) - Invasion (VFC0083)] [Listeria monocytogenes EGD-e]
CFSAN119118	NODE_56_length_10912_cov_8.884376	8390	10280	+	inlB	1-1891/1893	99.89	92.65	vfdb	NP_463963	(inlB) Internalin B [InlB (VF0070) - Invasion (VFC0083)] [Listeria monocytogenes EGD-e]
CFSAN119118	NODE_63_length_5833_cov_3.649141	61	210	+	llsA	1-150/150	100	98	vfdb	AHK25016	(llsA) listeriolysin S [LLS (VF0410) - Exotoxin (VFC0235)] [Listeria innocua SLCC6294]
CFSAN119118	NODE_63_length_5833_cov_3.649141	275	1162	+	llsG	1-888/888	100	97.3	vfdb	AHK25017	(llsG) ABC transporter ATP-binding protein LlsG [LLS (VF0410) - Exotoxin (VFC0235)] [Listeria innocua SLCC6294]
CFSAN119118	NODE_63_length_5833_cov_3.649141	1162	1911	+	llsH	1-750/750	100	97.47	vfdb	AHK25018	(llsH) ABC transporter permease protein LlsH [LLS (VF0410) - Exotoxin (VFC0235)] [Listeria innocua SLCC6294]
CFSAN119118	NODE_63_length_5833_cov_3.649141	1952	2269	+	llsX	1-318/318	100	97.17	vfdb	AHK25019	(llsX) LlsX [LLS (VF0410) - Exotoxin (VFC0235)] [Listeria innocua SLCC6294]
CFSAN119118	NODE_63_length_5833_cov_3.649141	2266	3141	+	llsB	1-876/876	100	97.37	vfdb	AHK25020	(llsB) SagB family dehydrogenase LlsB [LLS (VF0410) - Exotoxin (VFC0235)] [Listeria innocua SLCC6294]
CFSAN119118	NODE_63_length_5833_cov_3.649141	3149	4066	+	llsY	1-918/918	100	96.19	vfdb	AHK25021	(llsY) LlsY [LLS (VF0410) - Exotoxin (VFC0235)] [Listeria innocua SLCC6294]
CFSAN119118	NODE_63_length_5833_cov_3.649141	4059	5372	+	llsD	1-1314/1314	100	98.1	vfdb	AHK25022	(llsD) streptolysin-associated protein LlsD [LLS (VF0410) - Exotoxin (VFC0235)] [Listeria innocua SLCC6294]
CFSAN119118	NODE_6_length_119492_cov_11.047351	27688	28683	+	lplA1	1-996/996	100	92.77	vfdb	NP_464456	(lplA1) lipoate protein ligase [LplA1 (VF0347) - Nutritional/Metabolic factor (VFC0272)] [Listeria monocytogenes EGD-e]
CFSAN119118	NODE_6_length_119492_cov_11.047351	86717	88885	-	clpE	1-2175/2175	99.72	93.47	vfdb	NP_464522	(clpE) ATP-dependent protease [ClpE (VF0073) - Stress survival (VFC0282)] [Listeria monocytogenes EGD-e]
CFSAN119118	NODE_7_length_112183_cov_13.228698	10403	10840	+	gtcA	1-438/438	99.54	80.45	vfdb	NP_466072	(gtcA) wall teichoic acid glycosylation protein GtcA [GtcA (VF0607) - Post-translational modification (VFC0315)] [Listeria monocytogenes EGD-e]
CFSAN119118	NODE_7_length_112183_cov_13.228698	90388	91554	-	inlP	1-1167/1167	100	95.2	vfdb	NP_465993	(inlP) internalin P [InlP (VF0577) - Adherence (VFC0001)] [Listeria monocytogenes EGD-e]
CFSAN119118	NODE_7_length_112183_cov_13.228698	93212	93808	-	clpP	1-597/597	100	96.82	vfdb	NP_465991	(clpP) ATP-dependent Clp protease proteolytic subunit [ClpP (VF0074) - Stress survival (VFC0282)] [Listeria monocytogenes EGD-e]
CFSAN119118	NODE_8_length_108694_cov_12.015216	37029	38006	-	bsh	1-978/978	100	97.75	vfdb	NP_465591	(bsh) bile salt hydrolase [BSH (VF0350) - Stress survival (VFC0282)] [Listeria monocytogenes EGD-e]
CFSAN119119	NODE_10_length_119359_cov_20.351986	114627	117089	-	clpC	1-2463/2463	100	100	vfdb	NP_463763	(clpC) endopeptidase Clp ATP-binding chain C [ClpC (VF0072) - Stress survival (VFC0282)] [Listeria monocytogenes EGD-e]
CFSAN119119	NODE_13_length_100534_cov_16.972990	19317	24452	+	lapB	1-5136/5136	100	98.87	vfdb	NP_465191	(lapB) Listeria adhesion protein LapB [LapB (VF0446) - Adherence (VFC0001)] [Listeria monocytogenes EGD-e]
CFSAN119119	NODE_13_length_100534_cov_16.972990	61637	64237	-	lap	1-2601/2601	100	100	vfdb	NP_465159	(lap) Listeria adhesion protein Lap [Lap (VF0444) - Adherence (VFC0001)] [Listeria monocytogenes EGD-e]
CFSAN119119	NODE_14_length_96737_cov_16.125349	43283	45151	+	oatA	1-1869/1869	100	99.57	vfdb	NP_464816	(oatA) peptidoglycan O-acetyltransferase [OatA (VF0441) - Immune modulation (VFC0258)] [Listeria monocytogenes EGD-e]
CFSAN119119	NODE_14_length_96737_cov_16.125349	45185	46981	-	inlK	1-1797/1797	100	100	vfdb	NP_464815	(inlK) internalin K [InlK (VF0439) - Immune modulation (VFC0258)] [Listeria monocytogenes EGD-e]
CFSAN119119	NODE_15_length_74815_cov_18.186924	20435	21316	+	prsA2	1-882/882	100	100	vfdb	NP_465743	(prsA2) post translocation chaperone PrsA2 [PrsA2 (VF0449) - Post-translational modification (VFC0315)] [Listeria monocytogenes EGD-e]
CFSAN119119	NODE_17_length_64254_cov_21.581580	30489	31202	-	prfA	1-714/714	100	100	vfdb	NP_463731	(prfA) listeriolysin positive regulatory protein [PrfA (VF0062) - Regulation (VFC0301)] [Listeria monocytogenes EGD-e]
CFSAN119119	NODE_17_length_64254_cov_21.581580	31473	32426	-	plcA	1-954/954	100	100	vfdb	NP_463732	(plcA) phosphatidylinositol-specific phospholipase c [PlcA (VF0063) - Exotoxin (VFC0235)] [Listeria monocytogenes EGD-e]
CFSAN119119	NODE_17_length_64254_cov_21.581580	32668	34257	+	hly	1-1590/1590	100	100	vfdb	NP_463733	(hly) listeriolysin O precursor [LLO (VF0064) - Exotoxin (VFC0235)] [Listeria monocytogenes EGD-e]
CFSAN119119	NODE_17_length_64254_cov_21.581580	34588	36120	+	mpl	1-1533/1533	100	99.94	vfdb	NP_463734	(mpl) Zinc metalloproteinase precursor [Mpl (VF0065) - Exoenzyme (VFC0251)] [Listeria monocytogenes EGD-e]
CFSAN119119	NODE_17_length_64254_cov_21.581580	36319	38238	+	actA	1-1920/1920	100	100	vfdb	NP_463735	(actA) actin-assembly inducing protein precursor [ActA (VF0066) - Motility (VFC0204)] [Listeria monocytogenes EGD-e]
CFSAN119119	NODE_17_length_64254_cov_21.581580	38274	39143	+	plcB	1-870/870	100	100	vfdb	NP_463736	(plcB) phospholipase C [PlcB (VF0067) - Exotoxin (VFC0235)] [Listeria monocytogenes EGD-e]
CFSAN119119	NODE_18_length_61246_cov_18.909324	9651	10268	-	lntA	1-618/618	100	99.68	vfdb	NP_463967	(lntA) listeria nuclear targeted protein A [LntA (VF0440) - Immune modulation (VFC0258)] [Listeria monocytogenes EGD-e]
CFSAN119119	NODE_18_length_61246_cov_18.909324	18873	20765	-	inlB	1-1893/1893	100	100	vfdb	NP_463963	(inlB) Internalin B [InlB (VF0070) - Invasion (VFC0083)] [Listeria monocytogenes EGD-e]
CFSAN119119	NODE_18_length_61246_cov_18.909324	20850	23252	-	inlA	1-2403/2403	100	100	vfdb	NP_463962	(inlA) Internalin A [InlA (VF0069) - Invasion (VFC0083)] [Listeria monocytogenes EGD-e]
CFSAN119119	NODE_18_length_61246_cov_18.909324	38904	40304	-	pdgA	1-1401/1401	100	100	vfdb	NP_463944	(pdgA) Peptidoglycan N-deacetylase [PgdA (VF0442) - Immune modulation (VFC0258)] [Listeria monocytogenes EGD-e]
CFSAN119119	NODE_18_length_61246_cov_18.909324	45692	48157	-	inlF	1-2466/2466	100	100	vfdb	NP_463939	(inlF) internalin F [InlF (VF0447) - Adherence (VFC0001)] [Listeria monocytogenes EGD-e]
CFSAN119119	NODE_1_length_342444_cov_21.790381	228530	231085	+	inlJ	1-2556/2556	100	100	vfdb	NP_466343	(inlJ) internalin J [InlJ (VF0445) - Adherence (VFC0001)] [Listeria monocytogenes EGD-e]
CFSAN119119	NODE_21_length_37651_cov_18.205522	23657	25366	-	hbp2	1-1710/1710	100	100	vfdb	NP_465709	(hbp2) hypothetical protein [SvpA (VF0263) - Nutritional/Metabolic factor (VFC0272)] [Listeria monocytogenes EGD-e]
CFSAN119119	NODE_21_length_37651_cov_18.205522	25381	26004	-	hbp1/svpA	1-624/624	100	100	vfdb	NP_465710	(hbp1/svpA) Haemoglobin binding protein 1 [SvpA (VF0263) - Nutritional/Metabolic factor (VFC0272)] [Listeria monocytogenes EGD-e]
CFSAN119119	NODE_2_length_251637_cov_17.039179	13867	15252	+	hpt	1-1386/1386	100	97.83	vfdb	NP_464364	(hpt) hexose phosphate transport protein [Hpt (VF0264) - Nutritional/Metabolic factor (VFC0272)] [Listeria monocytogenes EGD-e]
CFSAN119119	NODE_2_length_251637_cov_17.039179	112526	113521	+	lplA1	1-996/996	100	100	vfdb	NP_464456	(lplA1) lipoate protein ligase [LplA1 (VF0347) - Nutritional/Metabolic factor (VFC0272)] [Listeria monocytogenes EGD-e]
CFSAN119119	NODE_2_length_251637_cov_17.039179	170615	172789	-	clpE	1-2175/2175	100	100	vfdb	NP_464522	(clpE) ATP-dependent protease [ClpE (VF0073) - Stress survival (VFC0282)] [Listeria monocytogenes EGD-e]
CFSAN119119	NODE_2_length_251637_cov_17.039179	249785	251502	+	aut	1-1719/1719	99.94	99.83	vfdb	NP_464601	(aut) autolysin [Auto (VF0348) - Invasion (VFC0083)] [Listeria monocytogenes EGD-e]
CFSAN119119	NODE_3_length_226404_cov_18.818355	6793	7683	-	inlC	1-891/891	100	100	vfdb	NP_465311	(inlC) internalin C [InlC (VF0438) - Immune modulation (VFC0258)] [Listeria monocytogenes EGD-e]
CFSAN119119	NODE_3_length_226404_cov_18.818355	50715	52427	+	fbpA	1-1713/1713	100	99.88	vfdb	NP_465354	(fbpA) fibronectin-binding protein [FbpA (VF0349) - Adherence (VFC0001)] [Listeria monocytogenes EGD-e]
CFSAN119119	NODE_3_length_226404_cov_18.818355	66999	67463	-	lspA	1-465/465	100	100	vfdb	NP_465369	(lspA) signal peptidase II [Lsp (VF0351) - Post-translational modification (VFC0315)] [Listeria monocytogenes EGD-e]
CFSAN119119	NODE_3_length_226404_cov_18.818355	70388	71320	-	lpeA	1-933/933	100	100	vfdb	NP_465372	(lpeA) lipoprotein promoting cell invasion [LpeA (VF0346) - Invasion (VFC0083)] [Listeria monocytogenes EGD-e]
CFSAN119119	NODE_4_length_203603_cov_17.959396	141104	142546	-	iap/cwhA	1-1449/1449	99.59	99.59	vfdb	NP_464110	(iap/cwhA) P60 extracellular protein invasion associated protein Iap [P60 (VF0068) - Invasion (VFC0083)] [Listeria monocytogenes EGD-e]
CFSAN119119	NODE_5_length_192067_cov_21.083349	35182	37935	-	ami	1-2754/2754	100	99.27	vfdb	NP_466081	(ami) autolysin amidase adhesin [Ami (VF0071) - Adherence (VFC0001)] [Listeria monocytogenes EGD-e]
CFSAN119119	NODE_5_length_192067_cov_21.083349	47685	48122	+	gtcA	1-438/438	100	100	vfdb	NP_466072	(gtcA) wall teichoic acid glycosylation protein GtcA [GtcA (VF0607) - Post-translational modification (VFC0315)] [Listeria monocytogenes EGD-e]
CFSAN119119	NODE_5_length_192067_cov_21.083349	127670	128836	-	inlP	1-1167/1167	100	99.14	vfdb	NP_465993	(inlP) internalin P [InlP (VF0577) - Adherence (VFC0001)] [Listeria monocytogenes EGD-e]
CFSAN119119	NODE_5_length_192067_cov_21.083349	130491	131087	-	clpP	1-597/597	100	100	vfdb	NP_465991	(clpP) ATP-dependent Clp protease proteolytic subunit [ClpP (VF0074) - Stress survival (VFC0282)] [Listeria monocytogenes EGD-e]
CFSAN119119	NODE_6_length_168788_cov_18.273306	101338	102315	+	bsh	1-978/978	100	100	vfdb	NP_465591	(bsh) bile salt hydrolase [BSH (VF0350) - Stress survival (VFC0282)] [Listeria monocytogenes EGD-e]
CFSAN119120	NODE_12_length_88953_cov_21.380913	37358	37975	-	lntA	1-618/618	100	99.68	vfdb	NP_463967	(lntA) listeria nuclear targeted protein A [LntA (VF0440) - Immune modulation (VFC0258)] [Listeria monocytogenes EGD-e]
CFSAN119120	NODE_12_length_88953_cov_21.380913	46580	48472	-	inlB	1-1893/1893	100	100	vfdb	NP_463963	(inlB) Internalin B [InlB (VF0070) - Invasion (VFC0083)] [Listeria monocytogenes EGD-e]
CFSAN119120	NODE_12_length_88953_cov_21.380913	48557	50959	-	inlA	1-2403/2403	100	100	vfdb	NP_463962	(inlA) Internalin A [InlA (VF0069) - Invasion (VFC0083)] [Listeria monocytogenes EGD-e]
CFSAN119120	NODE_12_length_88953_cov_21.380913	66611	68011	-	pdgA	1-1401/1401	100	100	vfdb	NP_463944	(pdgA) Peptidoglycan N-deacetylase [PgdA (VF0442) - Immune modulation (VFC0258)] [Listeria monocytogenes EGD-e]
CFSAN119120	NODE_12_length_88953_cov_21.380913	73399	75864	-	inlF	1-2466/2466	100	100	vfdb	NP_463939	(inlF) internalin F [InlF (VF0447) - Adherence (VFC0001)] [Listeria monocytogenes EGD-e]
CFSAN119120	NODE_13_length_84663_cov_25.148741	2271	4733	+	clpC	1-2463/2463	100	100	vfdb	NP_463763	(clpC) endopeptidase Clp ATP-binding chain C [ClpC (VF0072) - Stress survival (VFC0282)] [Listeria monocytogenes EGD-e]
CFSAN119120	NODE_15_length_80281_cov_21.362664	21142	22584	-	iap/cwhA	1-1449/1449	99.59	99.59	vfdb	NP_464110	(iap/cwhA) P60 extracellular protein invasion associated protein Iap [P60 (VF0068) - Invasion (VFC0083)] [Listeria monocytogenes EGD-e]
CFSAN119120	NODE_16_length_76200_cov_17.747019	26979	28696	-	aut	1-1719/1719	99.94	99.83	vfdb	NP_464601	(aut) autolysin [Auto (VF0348) - Invasion (VFC0083)] [Listeria monocytogenes EGD-e]
CFSAN119120	NODE_17_length_64648_cov_24.658576	25506	26375	-	plcB	1-870/870	100	100	vfdb	NP_463736	(plcB) phospholipase C [PlcB (VF0067) - Exotoxin (VFC0235)] [Listeria monocytogenes EGD-e]
CFSAN119120	NODE_17_length_64648_cov_24.658576	26411	28330	-	actA	1-1920/1920	100	100	vfdb	NP_463735	(actA) actin-assembly inducing protein precursor [ActA (VF0066) - Motility (VFC0204)] [Listeria monocytogenes EGD-e]
CFSAN119120	NODE_17_length_64648_cov_24.658576	28529	30061	-	mpl	1-1533/1533	100	99.94	vfdb	NP_463734	(mpl) Zinc metalloproteinase precursor [Mpl (VF0065) - Exoenzyme (VFC0251)] [Listeria monocytogenes EGD-e]
CFSAN119120	NODE_17_length_64648_cov_24.658576	30392	31981	-	hly	1-1590/1590	100	100	vfdb	NP_463733	(hly) listeriolysin O precursor [LLO (VF0064) - Exotoxin (VFC0235)] [Listeria monocytogenes EGD-e]
CFSAN119120	NODE_17_length_64648_cov_24.658576	32223	33176	+	plcA	1-954/954	100	100	vfdb	NP_463732	(plcA) phosphatidylinositol-specific phospholipase c [PlcA (VF0063) - Exotoxin (VFC0235)] [Listeria monocytogenes EGD-e]
CFSAN119120	NODE_17_length_64648_cov_24.658576	33447	34160	+	prfA	1-714/714	100	100	vfdb	NP_463731	(prfA) listeriolysin positive regulatory protein [PrfA (VF0062) - Regulation (VFC0301)] [Listeria monocytogenes EGD-e]
CFSAN119120	NODE_1_length_540611_cov_22.400432	6399	7289	-	inlC	1-891/891	100	100	vfdb	NP_465311	(inlC) internalin C [InlC (VF0438) - Immune modulation (VFC0258)] [Listeria monocytogenes EGD-e]
CFSAN119120	NODE_1_length_540611_cov_22.400432	50321	52033	+	fbpA	1-1713/1713	100	99.88	vfdb	NP_465354	(fbpA) fibronectin-binding protein [FbpA (VF0349) - Adherence (VFC0001)] [Listeria monocytogenes EGD-e]
CFSAN119120	NODE_1_length_540611_cov_22.400432	66605	67069	-	lspA	1-465/465	100	100	vfdb	NP_465369	(lspA) signal peptidase II [Lsp (VF0351) - Post-translational modification (VFC0315)] [Listeria monocytogenes EGD-e]
CFSAN119120	NODE_1_length_540611_cov_22.400432	69994	70926	-	lpeA	1-933/933	100	100	vfdb	NP_465372	(lpeA) lipoprotein promoting cell invasion [LpeA (VF0346) - Invasion (VFC0083)] [Listeria monocytogenes EGD-e]
CFSAN119120	NODE_1_length_540611_cov_22.400432	292619	293596	-	bsh	1-978/978	100	100	vfdb	NP_465591	(bsh) bile salt hydrolase [BSH (VF0350) - Stress survival (VFC0282)] [Listeria monocytogenes EGD-e]
CFSAN119120	NODE_1_length_540611_cov_22.400432	418571	420280	-	hbp2	1-1710/1710	100	100	vfdb	NP_465709	(hbp2) hypothetical protein [SvpA (VF0263) - Nutritional/Metabolic factor (VFC0272)] [Listeria monocytogenes EGD-e]
CFSAN119120	NODE_1_length_540611_cov_22.400432	420295	420918	-	hbp1/svpA	1-624/624	100	100	vfdb	NP_465710	(hbp1/svpA) Haemoglobin binding protein 1 [SvpA (VF0263) - Nutritional/Metabolic factor (VFC0272)] [Listeria monocytogenes EGD-e]
CFSAN119120	NODE_1_length_540611_cov_22.400432	453001	453882	+	prsA2	1-882/882	100	100	vfdb	NP_465743	(prsA2) post translocation chaperone PrsA2 [PrsA2 (VF0449) - Post-translational modification (VFC0315)] [Listeria monocytogenes EGD-e]
CFSAN119120	NODE_21_length_34822_cov_22.324427	8997	14132	-	lapB	1-5136/5136	100	98.87	vfdb	NP_465191	(lapB) Listeria adhesion protein LapB [LapB (VF0446) - Adherence (VFC0001)] [Listeria monocytogenes EGD-e]
CFSAN119120	NODE_2_length_223195_cov_24.220247	19910	21778	+	oatA	1-1869/1869	100	99.57	vfdb	NP_464816	(oatA) peptidoglycan O-acetyltransferase [OatA (VF0441) - Immune modulation (VFC0258)] [Listeria monocytogenes EGD-e]
CFSAN119120	NODE_2_length_223195_cov_24.220247	21812	23608	-	inlK	1-1797/1797	100	100	vfdb	NP_464815	(inlK) internalin K [InlK (VF0439) - Immune modulation (VFC0258)] [Listeria monocytogenes EGD-e]
CFSAN119120	NODE_3_length_192847_cov_24.296238	35182	37935	-	ami	1-2754/2754	100	99.27	vfdb	NP_466081	(ami) autolysin amidase adhesin [Ami (VF0071) - Adherence (VFC0001)] [Listeria monocytogenes EGD-e]
CFSAN119120	NODE_3_length_192847_cov_24.296238	47685	48122	+	gtcA	1-438/438	100	100	vfdb	NP_466072	(gtcA) wall teichoic acid glycosylation protein GtcA [GtcA (VF0607) - Post-translational modification (VFC0315)] [Listeria monocytogenes EGD-e]
CFSAN119120	NODE_3_length_192847_cov_24.296238	127670	128836	-	inlP	1-1167/1167	100	99.14	vfdb	NP_465993	(inlP) internalin P [InlP (VF0577) - Adherence (VFC0001)] [Listeria monocytogenes EGD-e]
CFSAN119120	NODE_3_length_192847_cov_24.296238	130491	131087	-	clpP	1-597/597	100	100	vfdb	NP_465991	(clpP) ATP-dependent Clp protease proteolytic subunit [ClpP (VF0074) - Stress survival (VFC0282)] [Listeria monocytogenes EGD-e]
CFSAN119120	NODE_5_length_180056_cov_19.890824	151563	154163	+	lap	1-2601/2601	100	100	vfdb	NP_465159	(lap) Listeria adhesion protein Lap [Lap (VF0444) - Adherence (VFC0001)] [Listeria monocytogenes EGD-e]
CFSAN119120	NODE_6_length_176080_cov_20.321313	13598	14983	+	hpt	1-1386/1386	100	97.83	vfdb	NP_464364	(hpt) hexose phosphate transport protein [Hpt (VF0264) - Nutritional/Metabolic factor (VFC0272)] [Listeria monocytogenes EGD-e]
CFSAN119120	NODE_6_length_176080_cov_20.321313	112257	113252	+	lplA1	1-996/996	100	100	vfdb	NP_464456	(lplA1) lipoate protein ligase [LplA1 (VF0347) - Nutritional/Metabolic factor (VFC0272)] [Listeria monocytogenes EGD-e]
CFSAN119120	NODE_6_length_176080_cov_20.321313	170237	172411	-	clpE	1-2175/2175	100	100	vfdb	NP_464522	(clpE) ATP-dependent protease [ClpE (VF0073) - Stress survival (VFC0282)] [Listeria monocytogenes EGD-e]
CFSAN119120	NODE_8_length_157820_cov_23.681096	43799	46354	+	inlJ	1-2556/2556	100	100	vfdb	NP_466343	(inlJ) internalin J [InlJ (VF0445) - Adherence (VFC0001)] [Listeria monocytogenes EGD-e]
CFSAN119122	NODE_11_length_92908_cov_20.012632	56296	58851	-	inlJ	1-2556/2556	100	97.61	vfdb	NP_466343	(inlJ) internalin J [InlJ (VF0445) - Adherence (VFC0001)] [Listeria monocytogenes EGD-e]
CFSAN119122	NODE_13_length_85912_cov_17.621449	29863	30480	-	lntA	1-618/618	100	91.1	vfdb	NP_463967	(lntA) listeria nuclear targeted protein A [LntA (VF0440) - Immune modulation (VFC0258)] [Listeria monocytogenes EGD-e]
CFSAN119122	NODE_13_length_85912_cov_17.621449	32152	34044	-	inlB	1-1893/1893	100	99.37	vfdb	NP_463963	(inlB) Internalin B [InlB (VF0070) - Invasion (VFC0083)] [Listeria monocytogenes EGD-e]
CFSAN119122	NODE_13_length_85912_cov_17.621449	34129	36531	-	inlA	1-2403/2403	100	99.21	vfdb	NP_463962	(inlA) Internalin A [InlA (VF0069) - Invasion (VFC0083)] [Listeria monocytogenes EGD-e]
CFSAN119122	NODE_13_length_85912_cov_17.621449	52183	53583	-	pdgA	1-1401/1401	100	99.71	vfdb	NP_463944	(pdgA) Peptidoglycan N-deacetylase [PgdA (VF0442) - Immune modulation (VFC0258)] [Listeria monocytogenes EGD-e]
CFSAN119122	NODE_13_length_85912_cov_17.621449	58971	61436	-	inlF	1-2466/2466	100	98.22	vfdb	NP_463939	(inlF) internalin F [InlF (VF0447) - Adherence (VFC0001)] [Listeria monocytogenes EGD-e]
CFSAN119122	NODE_15_length_74063_cov_14.527389	19879	21747	+	oatA	1-1869/1869	100	99.89	vfdb	NP_464816	(oatA) peptidoglycan O-acetyltransferase [OatA (VF0441) - Immune modulation (VFC0258)] [Listeria monocytogenes EGD-e]
CFSAN119122	NODE_15_length_74063_cov_14.527389	21781	23577	-	inlK	1-1797/1797	100	98.61	vfdb	NP_464815	(inlK) internalin K [InlK (VF0439) - Immune modulation (VFC0258)] [Listeria monocytogenes EGD-e]
CFSAN119122	NODE_17_length_68146_cov_20.843676	19659	20096	-	gtcA	1-438/438	100	99.77	vfdb	NP_466072	(gtcA) wall teichoic acid glycosylation protein GtcA [GtcA (VF0607) - Post-translational modification (VFC0315)] [Listeria monocytogenes EGD-e]
CFSAN119122	NODE_1_length_358592_cov_18.232003	66919	67896	+	bsh	1-978/978	100	99.9	vfdb	NP_465591	(bsh) bile salt hydrolase [BSH (VF0350) - Stress survival (VFC0282)] [Listeria monocytogenes EGD-e]
CFSAN119122	NODE_1_length_358592_cov_18.232003	288342	289274	+	lpeA	1-933/933	100	97.53	vfdb	NP_465372	(lpeA) lipoprotein promoting cell invasion [LpeA (VF0346) - Invasion (VFC0083)] [Listeria monocytogenes EGD-e]
CFSAN119122	NODE_1_length_358592_cov_18.232003	292199	292663	+	lspA	1-465/465	100	99.78	vfdb	NP_465369	(lspA) signal peptidase II [Lsp (VF0351) - Post-translational modification (VFC0315)] [Listeria monocytogenes EGD-e]
CFSAN119122	NODE_1_length_358592_cov_18.232003	307239	308951	-	fbpA	1-1713/1713	100	95.45	vfdb	NP_465354	(fbpA) fibronectin-binding protein [FbpA (VF0349) - Adherence (VFC0001)] [Listeria monocytogenes EGD-e]
CFSAN119122	NODE_1_length_358592_cov_18.232003	351307	352194	+	inlC	4-891/891	99.66	99.89	vfdb	NP_465311	(inlC) internalin C [InlC (VF0438) - Immune modulation (VFC0258)] [Listeria monocytogenes EGD-e]
CFSAN119122	NODE_23_length_37262_cov_19.621166	24913	25782	-	plcB	1-870/870	100	99.77	vfdb	NP_463736	(plcB) phospholipase C [PlcB (VF0067) - Exotoxin (VFC0235)] [Listeria monocytogenes EGD-e]
CFSAN119122	NODE_23_length_37262_cov_19.621166	27831	29363	-	mpl	1-1533/1533	100	99.22	vfdb	NP_463734	(mpl) Zinc metalloproteinase precursor [Mpl (VF0065) - Exoenzyme (VFC0251)] [Listeria monocytogenes EGD-e]
CFSAN119122	NODE_23_length_37262_cov_19.621166	29694	31283	-	hly	1-1590/1590	100	99.94	vfdb	NP_463733	(hly) listeriolysin O precursor [LLO (VF0064) - Exotoxin (VFC0235)] [Listeria monocytogenes EGD-e]
CFSAN119122	NODE_23_length_37262_cov_19.621166	31525	32478	+	plcA	1-954/954	100	98.32	vfdb	NP_463732	(plcA) phosphatidylinositol-specific phospholipase c [PlcA (VF0063) - Exotoxin (VFC0235)] [Listeria monocytogenes EGD-e]
CFSAN119122	NODE_23_length_37262_cov_19.621166	32749	33469	+	prfA	1-714/714	100	99.03	vfdb	NP_463731	(prfA) listeriolysin positive regulatory protein [PrfA (VF0062) - Regulation (VFC0301)] [Listeria monocytogenes EGD-e]
CFSAN119122	NODE_24_length_36208_cov_23.119675	2271	4733	+	clpC	1-2463/2463	100	99.92	vfdb	NP_463763	(clpC) endopeptidase Clp ATP-binding chain C [ClpC (VF0072) - Stress survival (VFC0282)] [Listeria monocytogenes EGD-e]
CFSAN119122	NODE_2_length_338568_cov_16.521568	4242	5960	-	aut	1-1719/1719	100	99.65	vfdb	NP_464601	(aut) autolysin [Auto (VF0348) - Invasion (VFC0083)] [Listeria monocytogenes EGD-e]
CFSAN119122	NODE_2_length_338568_cov_16.521568	82953	85127	+	clpE	1-2175/2175	100	99.63	vfdb	NP_464522	(clpE) ATP-dependent protease [ClpE (VF0073) - Stress survival (VFC0282)] [Listeria monocytogenes EGD-e]
CFSAN119122	NODE_2_length_338568_cov_16.521568	142221	143216	-	lplA1	1-996/996	100	98.49	vfdb	NP_464456	(lplA1) lipoate protein ligase [LplA1 (VF0347) - Nutritional/Metabolic factor (VFC0272)] [Listeria monocytogenes EGD-e]
CFSAN119122	NODE_2_length_338568_cov_16.521568	241287	242672	-	hpt	1-1386/1386	100	97.69	vfdb	NP_464364	(hpt) hexose phosphate transport protein [Hpt (VF0264) - Nutritional/Metabolic factor (VFC0272)] [Listeria monocytogenes EGD-e]
CFSAN119122	NODE_32_length_13266_cov_16.827156	7641	9077	-	iap/cwhA	1-1449/1449	99.17	98.28	vfdb	NP_464110	(iap/cwhA) P60 extracellular protein invasion associated protein Iap [P60 (VF0068) - Invasion (VFC0083)] [Listeria monocytogenes EGD-e]
CFSAN119122	NODE_3_length_265118_cov_15.833326	236683	239283	+	lap	1-2601/2601	100	99.85	vfdb	NP_465159	(lap) Listeria adhesion protein Lap [Lap (VF0444) - Adherence (VFC0001)] [Listeria monocytogenes EGD-e]
CFSAN119122	NODE_5_length_159463_cov_19.511724	96147	96743	+	clpP	1-597/597	100	99.83	vfdb	NP_465991	(clpP) ATP-dependent Clp protease proteolytic subunit [ClpP (VF0074) - Stress survival (VFC0282)] [Listeria monocytogenes EGD-e]
CFSAN119122	NODE_5_length_159463_cov_19.511724	98400	99566	+	inlP	1-1167/1167	100	92.8	vfdb	NP_465993	(inlP) internalin P [InlP (VF0577) - Adherence (VFC0001)] [Listeria monocytogenes EGD-e]
CFSAN119122	NODE_6_length_146199_cov_17.538851	53860	54741	-	prsA2	1-882/882	100	99.89	vfdb	NP_465743	(prsA2) post translocation chaperone PrsA2 [PrsA2 (VF0449) - Post-translational modification (VFC0315)] [Listeria monocytogenes EGD-e]
CFSAN119122	NODE_6_length_146199_cov_17.538851	86824	87447	+	hbp1/svpA	1-624/624	100	99.84	vfdb	NP_465710	(hbp1/svpA) Haemoglobin binding protein 1 [SvpA (VF0263) - Nutritional/Metabolic factor (VFC0272)] [Listeria monocytogenes EGD-e]
CFSAN119122	NODE_6_length_146199_cov_17.538851	87462	89171	+	hbp2	1-1710/1710	100	99.94	vfdb	NP_465709	(hbp2) hypothetical protein [SvpA (VF0263) - Nutritional/Metabolic factor (VFC0272)] [Listeria monocytogenes EGD-e]
CFSAN119123	NODE_10_length_118038_cov_17.125993	59769	60935	-	inlP	1-1167/1167	100	92.8	vfdb	NP_465993	(inlP) internalin P [InlP (VF0577) - Adherence (VFC0001)] [Listeria monocytogenes EGD-e]
CFSAN119123	NODE_10_length_118038_cov_17.125993	62592	63188	-	clpP	1-597/597	100	99.83	vfdb	NP_465991	(clpP) ATP-dependent Clp protease proteolytic subunit [ClpP (VF0074) - Stress survival (VFC0282)] [Listeria monocytogenes EGD-e]
CFSAN119123	NODE_11_length_116802_cov_15.788284	112070	114532	-	clpC	1-2463/2463	100	99.92	vfdb	NP_463763	(clpC) endopeptidase Clp ATP-binding chain C [ClpC (VF0072) - Stress survival (VFC0282)] [Listeria monocytogenes EGD-e]
CFSAN119123	NODE_12_length_113527_cov_15.335476	24357	26066	-	hbp2	1-1710/1710	100	99.94	vfdb	NP_465709	(hbp2) hypothetical protein [SvpA (VF0263) - Nutritional/Metabolic factor (VFC0272)] [Listeria monocytogenes EGD-e]
CFSAN119123	NODE_12_length_113527_cov_15.335476	26081	26704	-	hbp1/svpA	1-624/624	100	99.84	vfdb	NP_465710	(hbp1/svpA) Haemoglobin binding protein 1 [SvpA (VF0263) - Nutritional/Metabolic factor (VFC0272)] [Listeria monocytogenes EGD-e]
CFSAN119123	NODE_12_length_113527_cov_15.335476	58787	59668	+	prsA2	1-882/882	100	99.89	vfdb	NP_465743	(prsA2) post translocation chaperone PrsA2 [PrsA2 (VF0449) - Post-translational modification (VFC0315)] [Listeria monocytogenes EGD-e]
CFSAN119123	NODE_14_length_68249_cov_17.125730	48051	48488	+	gtcA	1-438/438	100	99.77	vfdb	NP_466072	(gtcA) wall teichoic acid glycosylation protein GtcA [GtcA (VF0607) - Post-translational modification (VFC0315)] [Listeria monocytogenes EGD-e]
CFSAN119123	NODE_15_length_59009_cov_16.862997	30478	31198	-	prfA	1-714/714	100	99.03	vfdb	NP_463731	(prfA) listeriolysin positive regulatory protein [PrfA (VF0062) - Regulation (VFC0301)] [Listeria monocytogenes EGD-e]
CFSAN119123	NODE_15_length_59009_cov_16.862997	31469	32422	-	plcA	1-954/954	100	98.32	vfdb	NP_463732	(plcA) phosphatidylinositol-specific phospholipase c [PlcA (VF0063) - Exotoxin (VFC0235)] [Listeria monocytogenes EGD-e]
CFSAN119123	NODE_15_length_59009_cov_16.862997	32664	34253	+	hly	1-1590/1590	100	99.94	vfdb	NP_463733	(hly) listeriolysin O precursor [LLO (VF0064) - Exotoxin (VFC0235)] [Listeria monocytogenes EGD-e]
CFSAN119123	NODE_15_length_59009_cov_16.862997	34584	36116	+	mpl	1-1533/1533	100	99.22	vfdb	NP_463734	(mpl) Zinc metalloproteinase precursor [Mpl (VF0065) - Exoenzyme (VFC0251)] [Listeria monocytogenes EGD-e]
CFSAN119123	NODE_15_length_59009_cov_16.862997	38165	39034	+	plcB	1-870/870	100	99.77	vfdb	NP_463736	(plcB) phospholipase C [PlcB (VF0067) - Exotoxin (VFC0235)] [Listeria monocytogenes EGD-e]
CFSAN119123	NODE_1_length_433975_cov_13.110158	40895	42691	+	inlK	1-1797/1797	100	98.61	vfdb	NP_464815	(inlK) internalin K [InlK (VF0439) - Immune modulation (VFC0258)] [Listeria monocytogenes EGD-e]
CFSAN119123	NODE_1_length_433975_cov_13.110158	42725	44593	-	oatA	1-1869/1869	100	99.89	vfdb	NP_464816	(oatA) peptidoglycan O-acetyltransferase [OatA (VF0441) - Immune modulation (VFC0258)] [Listeria monocytogenes EGD-e]
CFSAN119123	NODE_1_length_433975_cov_13.110158	402556	405156	+	lap	1-2601/2601	100	99.85	vfdb	NP_465159	(lap) Listeria adhesion protein Lap [Lap (VF0444) - Adherence (VFC0001)] [Listeria monocytogenes EGD-e]
CFSAN119123	NODE_20_length_16635_cov_13.002605	9353	10240	+	inlC	4-891/891	99.66	99.89	vfdb	NP_465311	(inlC) internalin C [InlC (VF0438) - Immune modulation (VFC0258)] [Listeria monocytogenes EGD-e]
CFSAN119123	NODE_2_length_399501_cov_13.828972	4367	6085	-	aut	1-1719/1719	100	99.65	vfdb	NP_464601	(aut) autolysin [Auto (VF0348) - Invasion (VFC0083)] [Listeria monocytogenes EGD-e]
CFSAN119123	NODE_2_length_399501_cov_13.828972	83078	85252	+	clpE	1-2175/2175	100	99.63	vfdb	NP_464522	(clpE) ATP-dependent protease [ClpE (VF0073) - Stress survival (VFC0282)] [Listeria monocytogenes EGD-e]
CFSAN119123	NODE_2_length_399501_cov_13.828972	142346	143341	-	lplA1	1-996/996	100	98.49	vfdb	NP_464456	(lplA1) lipoate protein ligase [LplA1 (VF0347) - Nutritional/Metabolic factor (VFC0272)] [Listeria monocytogenes EGD-e]
CFSAN119123	NODE_2_length_399501_cov_13.828972	241412	242797	-	hpt	1-1386/1386	100	97.69	vfdb	NP_464364	(hpt) hexose phosphate transport protein [Hpt (VF0264) - Nutritional/Metabolic factor (VFC0272)] [Listeria monocytogenes EGD-e]
CFSAN119123	NODE_3_length_375781_cov_14.674738	31677	33389	+	fbpA	1-1713/1713	100	95.45	vfdb	NP_465354	(fbpA) fibronectin-binding protein [FbpA (VF0349) - Adherence (VFC0001)] [Listeria monocytogenes EGD-e]
CFSAN119123	NODE_3_length_375781_cov_14.674738	47965	48429	-	lspA	1-465/465	100	99.78	vfdb	NP_465369	(lspA) signal peptidase II [Lsp (VF0351) - Post-translational modification (VFC0315)] [Listeria monocytogenes EGD-e]
CFSAN119123	NODE_3_length_375781_cov_14.674738	51354	52286	-	lpeA	1-933/933	100	97.53	vfdb	NP_465372	(lpeA) lipoprotein promoting cell invasion [LpeA (VF0346) - Invasion (VFC0083)] [Listeria monocytogenes EGD-e]
CFSAN119123	NODE_3_length_375781_cov_14.674738	272732	273709	-	bsh	1-978/978	100	99.9	vfdb	NP_465591	(bsh) bile salt hydrolase [BSH (VF0350) - Stress survival (VFC0282)] [Listeria monocytogenes EGD-e]
CFSAN119123	NODE_4_length_280763_cov_16.497534	84115	86670	+	inlJ	1-2556/2556	100	97.61	vfdb	NP_466343	(inlJ) internalin J [InlJ (VF0445) - Adherence (VFC0001)] [Listeria monocytogenes EGD-e]
CFSAN119123	NODE_5_length_211582_cov_14.288865	118780	120216	-	iap/cwhA	1-1449/1449	99.17	98.28	vfdb	NP_464110	(iap/cwhA) P60 extracellular protein invasion associated protein Iap [P60 (VF0068) - Invasion (VFC0083)] [Listeria monocytogenes EGD-e]
CFSAN119123	NODE_9_length_142077_cov_14.090990	38496	39113	-	lntA	1-618/618	100	91.1	vfdb	NP_463967	(lntA) listeria nuclear targeted protein A [LntA (VF0440) - Immune modulation (VFC0258)] [Listeria monocytogenes EGD-e]
CFSAN119123	NODE_9_length_142077_cov_14.090990	40785	42677	-	inlB	1-1893/1893	100	99.37	vfdb	NP_463963	(inlB) Internalin B [InlB (VF0070) - Invasion (VFC0083)] [Listeria monocytogenes EGD-e]
CFSAN119123	NODE_9_length_142077_cov_14.090990	42762	45164	-	inlA	1-2403/2403	100	99.21	vfdb	NP_463962	(inlA) Internalin A [InlA (VF0069) - Invasion (VFC0083)] [Listeria monocytogenes EGD-e]
CFSAN119123	NODE_9_length_142077_cov_14.090990	60816	62216	-	pdgA	1-1401/1401	100	99.71	vfdb	NP_463944	(pdgA) Peptidoglycan N-deacetylase [PgdA (VF0442) - Immune modulation (VFC0258)] [Listeria monocytogenes EGD-e]
CFSAN119123	NODE_9_length_142077_cov_14.090990	67604	70069	-	inlF	1-2466/2466	100	98.22	vfdb	NP_463939	(inlF) internalin F [InlF (VF0447) - Adherence (VFC0001)] [Listeria monocytogenes EGD-e]
CFSAN119134	NODE_10_length_102904_cov_17.950232	82120	83505	+	hpt	1-1386/1386	100	97.76	vfdb	NP_464364	(hpt) hexose phosphate transport protein [Hpt (VF0264) - Nutritional/Metabolic factor (VFC0272)] [Listeria monocytogenes EGD-e]
CFSAN119134	NODE_12_length_90290_cov_21.289930	25105	25973	-	plcB	2-870/870	99.89	95.63	vfdb	NP_463736	(plcB) phospholipase C [PlcB (VF0067) - Exotoxin (VFC0235)] [Listeria monocytogenes EGD-e]
CFSAN119134	NODE_12_length_90290_cov_21.289930	26012	27929	-	actA	1-1918/1920	99.9	94.21	vfdb	NP_463735	(actA) actin-assembly inducing protein precursor [ActA (VF0066) - Motility (VFC0204)] [Listeria monocytogenes EGD-e]
CFSAN119134	NODE_12_length_90290_cov_21.289930	28129	29661	-	mpl	1-1533/1533	100	94.91	vfdb	NP_463734	(mpl) Zinc metalloproteinase precursor [Mpl (VF0065) - Exoenzyme (VFC0251)] [Listeria monocytogenes EGD-e]
CFSAN119134	NODE_12_length_90290_cov_21.289930	29996	31585	-	hly	1-1590/1590	100	97.36	vfdb	NP_463733	(hly) listeriolysin O precursor [LLO (VF0064) - Exotoxin (VFC0235)] [Listeria monocytogenes EGD-e]
CFSAN119134	NODE_12_length_90290_cov_21.289930	31828	32781	+	plcA	1-954/954	100	97.28	vfdb	NP_463732	(plcA) phosphatidylinositol-specific phospholipase c [PlcA (VF0063) - Exotoxin (VFC0235)] [Listeria monocytogenes EGD-e]
CFSAN119134	NODE_12_length_90290_cov_21.289930	33054	33767	+	prfA	1-714/714	100	97.48	vfdb	NP_463731	(prfA) listeriolysin positive regulatory protein [PrfA (VF0062) - Regulation (VFC0301)] [Listeria monocytogenes EGD-e]
CFSAN119134	NODE_1_length_524070_cov_18.708951	6431	7321	-	inlC	1-891/891	100	97.19	vfdb	NP_465311	(inlC) internalin C [InlC (VF0438) - Immune modulation (VFC0258)] [Listeria monocytogenes EGD-e]
CFSAN119134	NODE_1_length_524070_cov_18.708951	50075	51787	+	fbpA	1-1713/1713	100	91.71	vfdb	NP_465354	(fbpA) fibronectin-binding protein [FbpA (VF0349) - Adherence (VFC0001)] [Listeria monocytogenes EGD-e]
CFSAN119134	NODE_1_length_524070_cov_18.708951	66358	66822	-	lspA	1-465/465	100	97.42	vfdb	NP_465369	(lspA) signal peptidase II [Lsp (VF0351) - Post-translational modification (VFC0315)] [Listeria monocytogenes EGD-e]
CFSAN119134	NODE_1_length_524070_cov_18.708951	69747	70679	-	lpeA	1-933/933	100	96.68	vfdb	NP_465372	(lpeA) lipoprotein promoting cell invasion [LpeA (VF0346) - Invasion (VFC0083)] [Listeria monocytogenes EGD-e]
CFSAN119134	NODE_1_length_524070_cov_18.708951	301648	302625	-	bsh	1-978/978	100	97.75	vfdb	NP_465591	(bsh) bile salt hydrolase [BSH (VF0350) - Stress survival (VFC0282)] [Listeria monocytogenes EGD-e]
CFSAN119134	NODE_1_length_524070_cov_18.708951	434181	435890	-	hbp2	1-1710/1710	100	93.45	vfdb	NP_465709	(hbp2) hypothetical protein [SvpA (VF0263) - Nutritional/Metabolic factor (VFC0272)] [Listeria monocytogenes EGD-e]
CFSAN119134	NODE_1_length_524070_cov_18.708951	435903	436529	-	hbp1/svpA	1-624/624	100	90.27	vfdb	NP_465710	(hbp1/svpA) Haemoglobin binding protein 1 [SvpA (VF0263) - Nutritional/Metabolic factor (VFC0272)] [Listeria monocytogenes EGD-e]
CFSAN119134	NODE_1_length_524070_cov_18.708951	468610	469491	+	prsA2	1-882/882	100	96.37	vfdb	NP_465743	(prsA2) post translocation chaperone PrsA2 [PrsA2 (VF0449) - Post-translational modification (VFC0315)] [Listeria monocytogenes EGD-e]
CFSAN119134	NODE_20_length_31311_cov_17.656491	18945	19562	-	lntA	1-618/618	100	95.95	vfdb	NP_463967	(lntA) listeria nuclear targeted protein A [LntA (VF0440) - Immune modulation (VFC0258)] [Listeria monocytogenes EGD-e]
CFSAN119134	NODE_20_length_31311_cov_17.656491	21264	23154	-	inlB	1-1891/1893	99.89	92.33	vfdb	NP_463963	(inlB) Internalin B [InlB (VF0070) - Invasion (VFC0083)] [Listeria monocytogenes EGD-e]
CFSAN119134	NODE_20_length_31311_cov_17.656491	23239	25641	-	inlA	1-2403/2403	100	96.75	vfdb	NP_463962	(inlA) Internalin A [InlA (VF0069) - Invasion (VFC0083)] [Listeria monocytogenes EGD-e]
CFSAN119134	NODE_3_length_321723_cov_16.419601	53957	55777	+	inlK	1-1797/1797	100	89.18	vfdb	NP_464815	(inlK) internalin K [InlK (VF0439) - Immune modulation (VFC0258)] [Listeria monocytogenes EGD-e]
CFSAN119134	NODE_3_length_321723_cov_16.419601	55810	57696	-	oatA	1-1869/1869	100	93.48	vfdb	NP_464816	(oatA) peptidoglycan O-acetyltransferase [OatA (VF0441) - Immune modulation (VFC0258)] [Listeria monocytogenes EGD-e]
CFSAN119134	NODE_4_length_228717_cov_19.860554	13189	14589	-	pdgA	1-1401/1401	100	97	vfdb	NP_463944	(pdgA) Peptidoglycan N-deacetylase [PgdA (VF0442) - Immune modulation (VFC0258)] [Listeria monocytogenes EGD-e]
CFSAN119134	NODE_4_length_228717_cov_19.860554	19975	22446	-	inlF	1-2466/2466	99.96	80.95	vfdb	NP_463939	(inlF) internalin F [InlF (VF0447) - Adherence (VFC0001)] [Listeria monocytogenes EGD-e]
CFSAN119134	NODE_4_length_228717_cov_19.860554	112407	113663	+	vip	1-1200/1200	100	85.36	vfdb	NP_463850	(vip) surface adhesin Vip [Vip (VF0443) - Invasion (VFC0083)] [Listeria monocytogenes EGD-e]
CFSAN119134	NODE_4_length_228717_cov_19.860554	223824	226286	-	clpC	1-2463/2463	100	94.15	vfdb	NP_463763	(clpC) endopeptidase Clp ATP-binding chain C [ClpC (VF0072) - Stress survival (VFC0282)] [Listeria monocytogenes EGD-e]
CFSAN119134	NODE_5_length_205540_cov_17.442153	78687	79682	+	lplA1	1-996/996	100	92.57	vfdb	NP_464456	(lplA1) lipoate protein ligase [LplA1 (VF0347) - Nutritional/Metabolic factor (VFC0272)] [Listeria monocytogenes EGD-e]
CFSAN119134	NODE_5_length_205540_cov_17.442153	137712	139880	-	clpE	1-2175/2175	99.72	93.66	vfdb	NP_464522	(clpE) ATP-dependent protease [ClpE (VF0073) - Stress survival (VFC0282)] [Listeria monocytogenes EGD-e]
CFSAN119134	NODE_6_length_159913_cov_16.905887	20685	25841	+	lapB	1-5136/5136	100	93.08	vfdb	NP_465191	(lapB) Listeria adhesion protein LapB [LapB (VF0446) - Adherence (VFC0001)] [Listeria monocytogenes EGD-e]
CFSAN119134	NODE_6_length_159913_cov_16.905887	65698	68298	-	lap	1-2601/2601	100	96.85	vfdb	NP_465159	(lap) Listeria adhesion protein Lap [Lap (VF0444) - Adherence (VFC0001)] [Listeria monocytogenes EGD-e]
CFSAN119134	NODE_7_length_143436_cov_21.821679	41656	42093	+	gtcA	1-438/438	99.54	80.45	vfdb	NP_466072	(gtcA) wall teichoic acid glycosylation protein GtcA [GtcA (VF0607) - Post-translational modification (VFC0315)] [Listeria monocytogenes EGD-e]
CFSAN119134	NODE_7_length_143436_cov_21.821679	121642	122808	-	inlP	1-1167/1167	100	95.29	vfdb	NP_465993	(inlP) internalin P [InlP (VF0577) - Adherence (VFC0001)] [Listeria monocytogenes EGD-e]
CFSAN119134	NODE_7_length_143436_cov_21.821679	124466	125062	-	clpP	1-597/597	100	96.82	vfdb	NP_465991	(clpP) ATP-dependent Clp protease proteolytic subunit [ClpP (VF0074) - Stress survival (VFC0282)] [Listeria monocytogenes EGD-e]
CFSAN119134	NODE_9_length_116313_cov_18.007178	109578	111005	+	iap/cwhA	1-1449/1449	98.34	95.45	vfdb	NP_464110	(iap/cwhA) P60 extracellular protein invasion associated protein Iap [P60 (VF0068) - Invasion (VFC0083)] [Listeria monocytogenes EGD-e]
CFSAN119135	NODE_10_length_77947_cov_14.185646	10108	11085	-	bsh	1-978/978	100	97.75	vfdb	NP_465591	(bsh) bile salt hydrolase [BSH (VF0350) - Stress survival (VFC0282)] [Listeria monocytogenes EGD-e]
CFSAN119135	NODE_11_length_76503_cov_14.138132	12118	12744	+	hbp1/svpA	1-624/624	100	90.27	vfdb	NP_465710	(hbp1/svpA) Haemoglobin binding protein 1 [SvpA (VF0263) - Nutritional/Metabolic factor (VFC0272)] [Listeria monocytogenes EGD-e]
CFSAN119135	NODE_11_length_76503_cov_14.138132	12757	14466	+	hbp2	1-1710/1710	100	93.45	vfdb	NP_465709	(hbp2) hypothetical protein [SvpA (VF0263) - Nutritional/Metabolic factor (VFC0272)] [Listeria monocytogenes EGD-e]
CFSAN119135	NODE_12_length_74110_cov_12.210305	19065	20951	+	oatA	1-1869/1869	100	93.48	vfdb	NP_464816	(oatA) peptidoglycan O-acetyltransferase [OatA (VF0441) - Immune modulation (VFC0258)] [Listeria monocytogenes EGD-e]
CFSAN119135	NODE_12_length_74110_cov_12.210305	20984	22804	-	inlK	1-1797/1797	100	89.18	vfdb	NP_464815	(inlK) internalin K [InlK (VF0439) - Immune modulation (VFC0258)] [Listeria monocytogenes EGD-e]
CFSAN119135	NODE_17_length_61089_cov_14.236147	3956	4837	+	prsA2	1-882/882	100	96.37	vfdb	NP_465743	(prsA2) post translocation chaperone PrsA2 [PrsA2 (VF0449) - Post-translational modification (VFC0315)] [Listeria monocytogenes EGD-e]
CFSAN119135	NODE_1_length_255301_cov_14.717557	185048	185980	+	lpeA	1-933/933	100	96.68	vfdb	NP_465372	(lpeA) lipoprotein promoting cell invasion [LpeA (VF0346) - Invasion (VFC0083)] [Listeria monocytogenes EGD-e]
CFSAN119135	NODE_1_length_255301_cov_14.717557	188905	189369	+	lspA	1-465/465	100	97.42	vfdb	NP_465369	(lspA) signal peptidase II [Lsp (VF0351) - Post-translational modification (VFC0315)] [Listeria monocytogenes EGD-e]
CFSAN119135	NODE_1_length_255301_cov_14.717557	203940	205652	-	fbpA	1-1713/1713	100	91.71	vfdb	NP_465354	(fbpA) fibronectin-binding protein [FbpA (VF0349) - Adherence (VFC0001)] [Listeria monocytogenes EGD-e]
CFSAN119135	NODE_1_length_255301_cov_14.717557	247824	248714	+	inlC	1-891/891	100	97.19	vfdb	NP_465311	(inlC) internalin C [InlC (VF0438) - Immune modulation (VFC0258)] [Listeria monocytogenes EGD-e]
CFSAN119135	NODE_21_length_46826_cov_14.666695	13772	16243	+	inlF	1-2466/2466	99.96	80.95	vfdb	NP_463939	(inlF) internalin F [InlF (VF0447) - Adherence (VFC0001)] [Listeria monocytogenes EGD-e]
CFSAN119135	NODE_21_length_46826_cov_14.666695	21629	23029	+	pdgA	1-1401/1401	100	97	vfdb	NP_463944	(pdgA) Peptidoglycan N-deacetylase [PgdA (VF0442) - Immune modulation (VFC0258)] [Listeria monocytogenes EGD-e]
CFSAN119135	NODE_23_length_43103_cov_13.332488	15209	16594	+	hpt	1-1386/1386	100	97.76	vfdb	NP_464364	(hpt) hexose phosphate transport protein [Hpt (VF0264) - Nutritional/Metabolic factor (VFC0272)] [Listeria monocytogenes EGD-e]
CFSAN119135	NODE_24_length_40297_cov_15.170475	14457	19613	-	lapB	1-5136/5136	100	93.08	vfdb	NP_465191	(lapB) Listeria adhesion protein LapB [LapB (VF0446) - Adherence (VFC0001)] [Listeria monocytogenes EGD-e]
CFSAN119135	NODE_27_length_38550_cov_14.656117	26184	26801	-	lntA	1-618/618	100	95.95	vfdb	NP_463967	(lntA) listeria nuclear targeted protein A [LntA (VF0440) - Immune modulation (VFC0258)] [Listeria monocytogenes EGD-e]
CFSAN119135	NODE_27_length_38550_cov_14.656117	28503	30393	-	inlB	1-1891/1893	99.89	92.33	vfdb	NP_463963	(inlB) Internalin B [InlB (VF0070) - Invasion (VFC0083)] [Listeria monocytogenes EGD-e]
CFSAN119135	NODE_27_length_38550_cov_14.656117	30478	32880	-	inlA	1-2403/2403	100	96.75	vfdb	NP_463962	(inlA) Internalin A [InlA (VF0069) - Invasion (VFC0083)] [Listeria monocytogenes EGD-e]
CFSAN119135	NODE_2_length_198279_cov_13.380284	71426	72421	+	lplA1	1-996/996	100	92.57	vfdb	NP_464456	(lplA1) lipoate protein ligase [LplA1 (VF0347) - Nutritional/Metabolic factor (VFC0272)] [Listeria monocytogenes EGD-e]
CFSAN119135	NODE_2_length_198279_cov_13.380284	130451	132619	-	clpE	1-2175/2175	99.72	93.66	vfdb	NP_464522	(clpE) ATP-dependent protease [ClpE (VF0073) - Stress survival (VFC0282)] [Listeria monocytogenes EGD-e]
CFSAN119135	NODE_33_length_29138_cov_14.602668	16522	17778	+	vip	1-1200/1200	100	85.36	vfdb	NP_463850	(vip) surface adhesin Vip [Vip (VF0443) - Invasion (VFC0083)] [Listeria monocytogenes EGD-e]
CFSAN119135	NODE_34_length_28338_cov_12.806281	25357	27957	-	lap	1-2601/2601	100	96.85	vfdb	NP_465159	(lap) Listeria adhesion protein Lap [Lap (VF0444) - Adherence (VFC0001)] [Listeria monocytogenes EGD-e]
CFSAN119135	NODE_35_length_28054_cov_17.949726	2271	4733	+	clpC	1-2463/2463	100	94.15	vfdb	NP_463763	(clpC) endopeptidase Clp ATP-binding chain C [ClpC (VF0072) - Stress survival (VFC0282)] [Listeria monocytogenes EGD-e]
CFSAN119135	NODE_3_length_175773_cov_14.124939	52343	53770	-	iap/cwhA	1-1449/1449	98.34	95.45	vfdb	NP_464110	(iap/cwhA) P60 extracellular protein invasion associated protein Iap [P60 (VF0068) - Invasion (VFC0083)] [Listeria monocytogenes EGD-e]
CFSAN119135	NODE_6_length_143813_cov_17.285588	18424	19020	+	clpP	1-597/597	100	96.82	vfdb	NP_465991	(clpP) ATP-dependent Clp protease proteolytic subunit [ClpP (VF0074) - Stress survival (VFC0282)] [Listeria monocytogenes EGD-e]
CFSAN119135	NODE_6_length_143813_cov_17.285588	20678	21844	+	inlP	1-1167/1167	100	95.29	vfdb	NP_465993	(inlP) internalin P [InlP (VF0577) - Adherence (VFC0001)] [Listeria monocytogenes EGD-e]
CFSAN119135	NODE_6_length_143813_cov_17.285588	101393	101830	-	gtcA	1-438/438	99.54	80.45	vfdb	NP_466072	(gtcA) wall teichoic acid glycosylation protein GtcA [GtcA (VF0607) - Post-translational modification (VFC0315)] [Listeria monocytogenes EGD-e]
CFSAN119135	NODE_9_length_87916_cov_16.935391	53947	54660	-	prfA	1-714/714	100	97.48	vfdb	NP_463731	(prfA) listeriolysin positive regulatory protein [PrfA (VF0062) - Regulation (VFC0301)] [Listeria monocytogenes EGD-e]
CFSAN119135	NODE_9_length_87916_cov_16.935391	54933	55886	-	plcA	1-954/954	100	97.28	vfdb	NP_463732	(plcA) phosphatidylinositol-specific phospholipase c [PlcA (VF0063) - Exotoxin (VFC0235)] [Listeria monocytogenes EGD-e]
CFSAN119135	NODE_9_length_87916_cov_16.935391	56129	57718	+	hly	1-1590/1590	100	97.36	vfdb	NP_463733	(hly) listeriolysin O precursor [LLO (VF0064) - Exotoxin (VFC0235)] [Listeria monocytogenes EGD-e]
CFSAN119135	NODE_9_length_87916_cov_16.935391	58053	59585	+	mpl	1-1533/1533	100	94.91	vfdb	NP_463734	(mpl) Zinc metalloproteinase precursor [Mpl (VF0065) - Exoenzyme (VFC0251)] [Listeria monocytogenes EGD-e]
CFSAN119135	NODE_9_length_87916_cov_16.935391	59785	61702	+	actA	1-1918/1920	99.9	94.21	vfdb	NP_463735	(actA) actin-assembly inducing protein precursor [ActA (VF0066) - Motility (VFC0204)] [Listeria monocytogenes EGD-e]
CFSAN119135	NODE_9_length_87916_cov_16.935391	61741	62609	+	plcB	2-870/870	99.89	95.63	vfdb	NP_463736	(plcB) phospholipase C [PlcB (VF0067) - Exotoxin (VFC0235)] [Listeria monocytogenes EGD-e]
CFSAN119136	NODE_12_length_90312_cov_28.412197	56546	57259	-	prfA	1-714/714	100	97.48	vfdb	NP_463731	(prfA) listeriolysin positive regulatory protein [PrfA (VF0062) - Regulation (VFC0301)] [Listeria monocytogenes EGD-e]
CFSAN119136	NODE_12_length_90312_cov_28.412197	57532	58485	-	plcA	1-954/954	100	97.28	vfdb	NP_463732	(plcA) phosphatidylinositol-specific phospholipase c [PlcA (VF0063) - Exotoxin (VFC0235)] [Listeria monocytogenes EGD-e]
CFSAN119136	NODE_12_length_90312_cov_28.412197	58728	60317	+	hly	1-1590/1590	100	97.36	vfdb	NP_463733	(hly) listeriolysin O precursor [LLO (VF0064) - Exotoxin (VFC0235)] [Listeria monocytogenes EGD-e]
CFSAN119136	NODE_12_length_90312_cov_28.412197	60652	62184	+	mpl	1-1533/1533	100	94.91	vfdb	NP_463734	(mpl) Zinc metalloproteinase precursor [Mpl (VF0065) - Exoenzyme (VFC0251)] [Listeria monocytogenes EGD-e]
CFSAN119136	NODE_12_length_90312_cov_28.412197	62384	64301	+	actA	1-1918/1920	99.9	94.21	vfdb	NP_463735	(actA) actin-assembly inducing protein precursor [ActA (VF0066) - Motility (VFC0204)] [Listeria monocytogenes EGD-e]
CFSAN119136	NODE_12_length_90312_cov_28.412197	64340	65208	+	plcB	2-870/870	99.89	95.63	vfdb	NP_463736	(plcB) phospholipase C [PlcB (VF0067) - Exotoxin (VFC0235)] [Listeria monocytogenes EGD-e]
CFSAN119136	NODE_19_length_35160_cov_25.714441	9320	14476	-	lapB	1-5136/5136	100	93.08	vfdb	NP_465191	(lapB) Listeria adhesion protein LapB [LapB (VF0446) - Adherence (VFC0001)] [Listeria monocytogenes EGD-e]
CFSAN119136	NODE_1_length_449499_cov_21.839643	30481	33081	-	lap	1-2601/2601	100	96.85	vfdb	NP_465159	(lap) Listeria adhesion protein Lap [Lap (VF0444) - Adherence (VFC0001)] [Listeria monocytogenes EGD-e]
CFSAN119136	NODE_1_length_449499_cov_21.839643	388710	390596	+	oatA	1-1869/1869	100	93.48	vfdb	NP_464816	(oatA) peptidoglycan O-acetyltransferase [OatA (VF0441) - Immune modulation (VFC0258)] [Listeria monocytogenes EGD-e]
CFSAN119136	NODE_1_length_449499_cov_21.839643	390629	392449	-	inlK	1-1797/1797	100	89.18	vfdb	NP_464815	(inlK) internalin K [InlK (VF0439) - Immune modulation (VFC0258)] [Listeria monocytogenes EGD-e]
[truncated: 297 more rows]

## Sheet: Table S5
Supplementary data: Table S5 AMR data
[truncated: 121 more rows]

## Sheet: Table S6
Supplementary data: Table S6: AMR and Conjugative plasmid genes
[truncated: 66 more rows]

[truncated: 3 more sheets: Table S7, Table S8, Table S9]
